# Supplementary material for: Two Different High Throughput Sequencing Approaches Identify Thousands of De Novo Genomic Markers for the Genetically Depleted Bornean Elephant
Source: PLoS One. 2012 Nov 21;7(11):e49533. doi: 10.1371/journal.pone.0049533 (PMC3504023; doi:10.1371/journal.pone.0049533)
Supplement: Table S1 — List of RAD tags/loci with genotypes. A complete list (vcf file) of all RAD tag/loci where genotypes were obtained for all individuals (100%) for 1,200 loci/RAD tags, and for 75% of the individuals (i.e. six or more) for 1,700 loci. For the remaining 400 loci, the SNPs were shared by less than six individuals. Eight E. m. borneensis samples were used in the discovery panel of RAD-sequencing using Illumina platform. (XLSX) [file pone.0049533.s001.xlsx]

## Sheet: Table S1
##fileformat=VCFv4.1
##fileDate=2012-02-19 13:18:34
##source=FGX_popgen.pl
##contig=N/A
##phasing=none
##INFO=<ID=NS,Number=1,Type=Integer,Description="Number of Samples With Data">
##INFO=<ID=DP,Number=1,Type=Integer,Description="Total Depth">
##INFO=<ID=AN,Number=1,Type=Integer,Description="Number of Alleles in Population">
##INFO=<ID=AS,Number=.,Type=String,Description="Annotated SNP">
##FILTER=<ID=q10,Description="Quality below 10">
##FILTER=<ID=s50,Description="Less than 50% of samples have data">
##FORMAT=<ID=GT,Number=1,Type=String,Description="FGX Consensus Genotype (threshold model)">
##FORMAT=<ID=DP,Number=1,Type=Integer,Description="Sample Read Depth">
##FORMAT=<ID=GQ,Number=1,Type=Integer,Description="Genotype Quality (SAMtools bayesian framework)">
##FORMAT=<ID=EC,Number=.,Type=String,Description="Alternate Allele Counts in Sample">
##FORMAT=<ID=SG,Number=.,Type=String,Description="SAMtools Consensus Genotype (diploid model)">
#CHROM	POS	ID	REF	ALT	QUAL	FILTER	INFO	FORMAT	Elephant_1_sequence_2_pileup.txt	Elephant_2_sequence_2_pileup.txt	Elephant_3_sequence_2_pileup.txt	Elephant_4_sequence_2_pileup.txt	Elephant_5_sequence_2_pileup.txt	Elephant_6_sequence_2_pileup.txt	Elephant_7_sequence_2_pileup.txt	Elephant_8_sequence_2_pileup.txt
10581_GGCCGGGACAGCCTTTCCAGGGAGCCGGGACGCCG_NODE_2_length_293_cov_12.409556	184	.	C	T	83.62	PASS	NS=8:AN=1:DP=225:AS=CACTCCCTACTAAATCAGGTTTTCTTGCCCTGAGCGTCCGTTTTCAGGGT[C/T]TCAAGGACTGGACAAAGGTAAAACAATAATTTTGCCACTGCTTGCTGTGG	GT:DP:GQ:EC:SG	0/1:19:78:12:Y	0:37:138:0:C	0:36:135:0:C	0:31:120:0:C	0/1:36:81:20:Y	0/1:17:64:8:Y	0/1:44:26:8:C	0/1:5:27:3:Y
6224_GGCCGCAGAGGACGAGCTGGTGGCAGAACTTGTGG_NODE_2_length_323_cov_9.343654	63	.	C	A	19.86	PASS	NS=7:AN=1:DP=45:AS=ATTTCACGGCAGATTTCAAGCTGTGCTAAACACTGGCAGCAACAGTCTTT[C/A]AAAGCTATCCTACAATTGAGACGTTTCACTAATTCTGACCTAAATGAGCT	GT:DP:GQ:EC:SG	.:0:0:0:.	1:24:84:24:A	1:5:12:5:A	1:1:6:1:A	1:3:6:3:A	1:3:6:3:A	1:8:21:8:A	1:1:4:1:C
10003_GGCCGTTTCCCCCGGAGAACTGCCTCGCCGTAGCC_NODE_2_length_182_cov_6.456044	66	.	T	C	72	PASS	NS=8:AN=1:DP=434	GT:DP:GQ:EC:SG	0/1:24:19:4:T	0/1:54:148:30:Y	0/1:75:129:28:Y	0/1:99:78:16:T	0/1:112:108:15:T	0:14:69:0:T	0/1:37:24:8:Y	0/1:19:1:4:T
5056_GGCCGCGGCACTGGTTGCTATAGTGGCCGTGGTCG_NODE_2_length_290_cov_17.110344	158	.	A	G	79.25	PASS	NS=8:AN=1:DP=298:AS=ATTTTTAAAAAGTTGAATGGTGGAGGATGCATTCATCAAATATATTTGGC[A/G]GGGTATAAAGCCAGTGGTCAATAAAGCCTTTAAGTTAAGGAAACTGACAT	GT:DP:GQ:EC:SG	1:37:102:37:G	0/1:56:66:37:R	0/1:66:71:37:R	0:53:193:0:A	1:26:75:26:G	1:16:48:16:G	0/1:35:42:11:R	0/1:9:37:5:R
3351_GGCCGGTACTCAGGAAATGTTTGGACAAGTGAACC_NODE_2_length_194_cov_7.463918	104	.	C	A	22.25	PASS	NS=8:AN=1:DP=135	GT:DP:GQ:EC:SG	0/1:3:19:1:C	0/1:11:20:7:M	0/1:6:13:5:M	0/1:31:30:17:M	0/1:40:34:23:M	0/1:7:15:6:M	0/1:31:32:23:M	1:6:15:6:A
7485_GGCCGCAGACTGGGCAGTGAGCTCCGGGATCTCGG_NODE_2_length_291_cov_10.646049	270	.	T	C	46.67	PASS	NS=6:AN=1:DP=47	GT:DP:GQ:EC:SG	0/1:5:1:4:Y	.:0:0:0:N	0:13:78:0:T	0:18:84:0:T	0:3:39:0:T	0:4:39:0:T	0:4:39:0:T	.:0:0:0:N
7646_GGCCGCGAGCCTGTGCATCCTTGGAAGACATCCTT_NODE_2_length_295_cov_12.467796	251	.	G	A	123.62	PASS	NS=8:AN=1:DP=271	GT:DP:GQ:EC:SG	0:21:93:0:G	0:11:60:0:G	0:38:144:0:G	0:61:212:0:G	0:56:196:0:G	0:28:111:0:G	1:38:92:38:A	0:18:81:0:G
3467_GGCCGTGGGCAGCCAGGTGGCGGTGAGGGAAGGGG_NODE_2_length_282_cov_19.312057	114	.	G	T	67.5	PASS	NS=8:AN=1:DP=169:AS=GGCAGTTCTACCTTGTCCTAGGAGCAGGAAGCAGTGGGCTTTTTGGTTTA[G/T]ACCCCAAATATTGCATGGGACATACTTAAAAAAAATAATTTGTTGTTTAC	GT:DP:GQ:EC:SG	0:22:96:0:G	0/1:38:78:13:K	0/1:30:41:7:K	0:36:135:0:G	0:12:63:0:G	0:11:60:0:G	0/1:13:58:6:K	0/1:7:9:2:K
6484_GGCCGGTTCAGGCGCGGTCACCTGCCCGAGCTGCA_NODE_2_length_201_cov_8.422886	151	.	C	T	75.5	PASS	NS=8:AN=1:DP=165:AS=GGAACCCCCGTAGACATCCCCCAGGACTCCCGGAGCTGAGAGCACTCCCG[C/T]CCCCTGGGGCCTATCGTTTGGGTCTGACTGACCCCCAGTCCTGCACGCTC	GT:DP:GQ:EC:SG	1:14:42:14:T	1:6:15:6:T	0:39:147:0:C	0:38:141:0:C	1:19:63:19:T	0:25:102:0:C	0/1:16:43:7:Y	0:8:51:0:C
963_GGCCGCGGGAAACTGAGTCCTGGCTTGCCCGCTGG_NODE_2_length_318_cov_12.915094	57	.	C	T	23.83	PASS	NS=6:AN=1:DP=46:AS=AAAGCTGTATTGCCTCACTTCCCTCTCTGCTCTTAAAATATGAGTCACAG[C/T]ACAGTTTAAGAATTACACTCCCTGTCTCCTACATTTGCAAAAGTTAAGTG	GT:DP:GQ:EC:SG	.:0:0:0:.	1:15:42:15:T	1:15:42:15:T	1:4:9:4:T	1:1:7:1:C	1:1:13:1:C	1:10:30:10:T	.:0:0:0:.
3247_GGCCGCGAGAGCCAATCCGCTTGCACGGGAGGCCC_NODE_2_length_160_cov_6.825000	56	.	A	C	12	PASS	NS=6:AN=1:DP=14:AS=TGAGCGTCACCAGGACACCCCCTGCTTAGTCAGTCACTGGAATGCTCTGC[A/C]TCACTGGAGGAAGAGGTGTCAAAACTTGAAAATAACATGGGGCAGGTGTA	GT:DP:GQ:EC:SG	.:0:0:0:.	0/1:4:17:3:M	1:2:3:2:C	0:1:30:0:A	0/1:2:9:1:A	.:0:0:0:.	1:3:6:3:C	0/1:2:7:1:A
7287_GGCCGTGGGAGACAGGATGGGAAGGGAAATCAGCG_NODE_1_length_131_cov_56.541985	68	.	G	A	40.5	PASS	NS=8:AN=1:DP=530	GT:DP:GQ:EC:SG	0/1:75:48:19:R	0/1:10:25:1:G	0/1:20:38:5:R	0/1:78:46:20:R	0/1:90:34:22:R	0/1:52:84:18:R	0/1:73:32:18:R	0/1:132:17:34:R
1235_GGCCGGTTAGCTCAGTTGGTTAGAGCGTGGTGCTA_NODE_7_length_240_cov_5.387500	125	.	C	G	50.29	PASS	NS=7:AN=1:DP=95	GT:DP:GQ:EC:SG	0/1:8:1:2:S	0:20:90:0:C	0/1:20:33:6:S	0:17:78:0:C	0:8:51:0:C	0:7:48:0:C	0:15:51:0:C	.:0:0:0:.
3477_GGCCGGTGGCTGTGCACACAATATCCTGCAAACAC_NODE_2_length_204_cov_22.990196	147	.	G	A	97.12	PASS	NS=8:AN=1:DP=216:AS=TTTCTCTTGTGCTCTCCAGTATTATTAGCAATTTTTTACAATGAGAATAT[G/A]TATTTTCGTAATTGGATCAAATAAGCTATTTTTATTTTGGGGGAAAAGTT	GT:DP:GQ:EC:SG	0:36:135:0:G	0:6:45:0:G	0:23:96:0:G	0/1:43:109:21:R	0:27:108:0:G	0/1:22:77:8:R	0:27:108:0:G	0:32:99:0:G
1124_GGCCGGTAGATGGCGTGGGGGTCTCTGAGCTGCAC_NODE_2_length_226_cov_14.712389	182	.	A	G	58.5	PASS	NS=8:AN=1:DP=137:AS=AAGCTTTTAAAAAAACAAAACTTTAAAAAATATACACCTTAGAATTGTGG[A/G]AATTATATATATAGAGAGAGAGAGTTCGGGTGAGCTTGTCTGCTAACCTA	GT:DP:GQ:EC:SG	1:12:33:12:G	0/1:20:48:11:R	0:23:96:0:A	0/1:25:64:2:A	0/1:16:23:6:R	0:11:60:0:A	0:29:114:0:A	0:1:30:0:A
9984_GGCCGCACAGGGCTTCCAGAGCCCTCTCCTCCTTC_NODE_2_length_208_cov_16.240385	116	.	A	G	61.38	PASS	NS=8:AN=1:DP=261:AS=AGTCCCATAAATCTTCCTCGGAGGAATTAGTTAATTAATCAATTAATTAA[A/G]GAAAAGTGGACCCCCACTCCCCAAACCCCGTTTAAGCTGAACACCGGGGT	GT:DP:GQ:EC:SG	1:24:69:24:G	1:18:51:18:G	1:65:95:65:G	0/1:59:45:23:R	1:46:90:46:G	1:19:54:19:G	1:24:69:24:G	0/1:6:18:5:R
6819_GGCCGCGACTGATGGCGGGGCGGGGTGGCAGACGT_NODE_2_length_266_cov_6.620301	39	.	T	A	9.14	q10	NS=7:AN=1:DP=39	GT:DP:GQ:EC:SG	1:4:9:4:A	1:7:18:7:A	1:7:18:7:A	0/1:12:1:11:A	1:4:9:4:A	1:3:6:3:A	1:2:3:2:A	.:0:0:0:.
10692_GGCCGCTGTGCTCCCTCTTAATAAAACCTCCGCCG_NODE_2_length_275_cov_5.305455	34	.	A	C	5.67	q10	NS=6:AN=1:DP=16	GT:DP:GQ:EC:SG	.:0:0:0:.	1:2:3:2:C	1:7:18:7:C	1:1:2:1:A	.:0:0:0:.	1:1:2:1:A	1:3:6:3:C	1:2:3:2:C
1468_GGCCGGGCAGAGCTGCGTTCAGCTTCACAGCCAGG_NODE_3_length_240_cov_15.979167	19	.	G	A	69.62	PASS	NS=8:AN=1:DP=541	GT:DP:GQ:EC:SG	0:41:69:0:G	0/1:42:20:7:R	0/1:96:0:19:R	0/1:107:12:21:G	0:105:174:0:G	0/1:39:19:7:R	0:98:197:0:G	0:13:66:0:G
10419_GGCCGGTTCATGGTGGACTGCACCCGCCCACACAG_NODE_2_length_255_cov_7.184314	137	.	C	A	60.75	PASS	NS=8:AN=1:DP=177:AS=GTCTCAGGCATGAATGGTGTGGAGGGGAGGCAGACGCCTGTGGTGTAAGG[C/A]AGGCAGAAGGATCTGAGCAAGGATGATGGAGCGGTGCCCGTGTCTGCGGA	GT:DP:GQ:EC:SG	1:18:51:18:A	1:18:51:18:A	1:35:102:35:A	1:32:69:31:A	1:27:81:27:A	1:6:15:6:A	1:32:93:32:A	1:9:24:9:A
2603_GGCCGCAGGGAGGCTCCTAGGAAGTTGTTAGTAGT_NODE_2_length_315_cov_10.444445	251	.	G	T	68.25	PASS	NS=8:AN=1:DP=207:AS=GGCCCTGTAGTGACCCGGTGCCTTCCAACTTGGGAGGCTCAGAAAGGAAA[G/T]AAGGAGGCTGCGCCCAGGCGAACCTCAGTTTCCATGCTATCACAGGGGGC	GT:DP:GQ:EC:SG	0/1:43:109:25:K	1:8:21:8:T	1:20:57:20:T	0/1:34:48:11:K	0/1:23:40:7:K	1:17:51:17:T	0/1:33:106:18:K	0:29:114:0:G
4732_GGCCGCACCTTCCTCCCGTGGAAGCTGCTCGGCCC_NODE_3_length_177_cov_27.508474	88	.	C	T	67.12	PASS	NS=8:AN=1:DP=466	GT:DP:GQ:EC:SG	0/1:44:16:10:Y	0:14:36:0:C	0/1:38:44:13:Y	0/1:144:157:16:C	0/1:97:76:14:C	0:49:152:0:C	0/1:50:20:13:Y	0/1:30:36:4:C
268_GGCCGGGGAGAAAAGGCCTCTTGCTATACTCTTTT_NODE_2_length_323_cov_12.445821	291	.	C	G	21.57	PASS	NS=7:AN=1:DP=87	GT:DP:GQ:EC:SG	0/1:28:1:5:C	1:5:12:5:G	.:0:0:0:.	0:6:45:0:C	1:2:3:2:G	0:3:39:0:C	0/1:8:3:2:S	0/1:35:48:10:S
1326_GGCCGGTGGTAGTTGAGAACCCTAAGACGCTGGTG_NODE_2_length_228_cov_6.425438	74	.	G	A	16.43	PASS	NS=7:AN=1:DP=43:AS=AGCTCCTGCACACGCCCACGTGGTAGGGTATTAACACTTAACAGTGGAGG[G/A]GGTAGTTCTGCTCCCCTCCCCCTTGGAGCGATATCCTGCAATTTAACATA	GT:DP:GQ:EC:SG	1:2:3:2:A	1:11:30:11:A	1:8:21:8:A	1:11:30:11:A	1:1:2:1:G	.:0:0:0:.	1:9:24:9:A	1:1:5:1:G
3617_GGCCGGTTGTCTCGCGGGCTCCTCCTTACGGACCG_NODE_2_length_257_cov_7.147860	54	.	A	C	38.14	PASS	NS=7:AN=1:DP=94:AS=CCAGCTTGCCACGTCAGGGAACGTTTGGAAGCCCAGGTGCCCCAGATCTG[A/C]GAAACTAGAAAGCCAAACTACGTGAGGGATGGGGCCCAGTGGGGAAGATG	GT:DP:GQ:EC:SG	1:8:21:8:C	1:18:54:18:C	1:27:81:27:C	1:12:33:12:C	1:11:30:11:C	1:1:0:1:M	1:17:48:17:C	.:0:0:0:.
7064_GGCCGCCTGCACCAGCTGTTTGTGCCCACCGCCGC_NODE_2_length_263_cov_9.049430	92	.	T	C	75.12	PASS	NS=8:AN=1:DP=244:AS=TGAGCCCAGGGCTTTCTAGCTCGGGGAAGCTGAGAGGAGGGAGGGAAAAG[T/C]AGTCTGGTCACCAGCCCTGGGCATCAGAAAAGGGCAGGGGGACCCCTTCA	GT:DP:GQ:EC:SG	1:17:48:17:C	1:40:117:40:C	1:41:120:41:C	0/1:52:98:24:Y	0/1:42:68:26:Y	1:16:45:16:C	0/1:27:81:17:Y	1:9:24:9:C
1053_GGCCGCTTCCAGGCGCCCACTGGGGACCTGAGCCC_NODE_2_length_211_cov_18.526066	118	.	T	G	76.5	PASS	NS=8:AN=1:DP=267:AS=TACTTCTTGATGGCCTATTGCGTGCCAAGTACTGGATGATCCGGTGTTTG[T/G]AGCATCCCTTTTGCGAGTTCTCAGGCGTTGAGAATTTTATTCCAATCTTC	GT:DP:GQ:EC:SG	1:13:36:13:G	1:47:119:47:G	1:64:128:64:G	0/1:60:74:25:K	0/1:16:69:10:K	0/1:17:36:6:K	1:39:117:39:G	1:11:33:11:G
117_GGCCGGAACAGACTAAGTACCTGCTGAATTCCAGG_NODE_2_length_281_cov_6.597865	271	.	G	A	32.62	PASS	NS=8:AN=1:DP=42	GT:DP:GQ:EC:SG	0/1:3:8:1:G	0:7:48:0:G	0:4:39:0:G	0:9:57:0:G	0:4:39:0:G	0:5:42:0:G	0/1:8:22:5:R	0/1:2:6:1:G
8894_GGCCGGGGACTCTGGAAATCCCCCTTTACCCTCCA_NODE_2_length_232_cov_7.215517	91	.	A	G	45.62	PASS	NS=8:AN=1:DP=71:AS=TCTCAGTGGTGCTCAACAGTGCATCCACTGGGCAGCTTGCCTGTTCTCTG[A/G]GTAACTGTTCAAATCCTTACGGCTCACAGAGCCCCTGAGAATTAGCAAAA	GT:DP:GQ:EC:SG	0:2:33:0:A	0:3:39:0:A	1:25:72:25:G	0:15:72:0:A	0/1:9:14:3:R	0:5:42:0:A	0:10:60:0:A	0:2:33:0:A
3287_GGCCGCCGCTGCTTCGTGGAGGCCGCGGAGGTGGG_NODE_2_length_218_cov_7.513762	145	.	C	T	30.38	PASS	NS=8:AN=1:DP=469	GT:DP:GQ:EC:SG	0/1:32:10:6:C	0/1:63:41:24:Y	0/1:45:47:19:Y	0/1:73:39:28:Y	0/1:88:7:27:Y	0/1:46:41:16:Y	0/1:102:4:29:C	0/1:20:54:10:Y
10789_GGCCGGAAGGGGCGGGGCGAGGACGCCCCTCTAAC_NODE_2_length_221_cov_26.126698	132	.	G	A	108.75	PASS	NS=8:AN=1:DP=425:AS=ATGTTTAACACATCAAGGTGAGGTGCAATAGCACGATGGACGAACAACTT[G/A]TAAGTATGCAGGATGCCGGGGAATAAAGAGCAACAGTTGCGAAAATCCCT	GT:DP:GQ:EC:SG	1:32:93:32:A	0/1:29:79:12:R	1:39:114:39:A	0/1:75:97:35:R	0/1:76:100:34:R	0:26:105:0:G	1:122:177:122:A	0:26:105:0:G
9477_GGCCGAGCAACTGGCACCCGACAAAGCCAATCAGA_NODE_2_length_280_cov_13.096429	93	.	G	C	65.12	PASS	NS=8:AN=1:DP=165	GT:DP:GQ:EC:SG	0:20:87:0:G	0/1:40:73:14:S	1:16:45:16:C	0:42:153:0:G	0/1:18:25:4:S	0:14:69:0:G	1:13:36:13:C	0:2:33:0:G
2193_GGCCGCCCCGCACAAAGATGGCCGTGGACGCCGCA_NODE_3_length_173_cov_8.057803	73	.	A	G	75.62	PASS	NS=8:AN=1:DP=192:AS=GTCGATTTACTCATAGCAATCCTATAGGACAGAGTAGAACTGCCCCATGG[A/G]GTTTCCATGGAGCGCCTGGTGGATTCGAACTGCGGACCTTTTGGTTAGCA	GT:DP:GQ:EC:SG	0:14:69:0:A	0:4:42:0:A	1:35:102:35:G	0:35:132:0:A	0/1:39:57:29:R	0:13:66:0:A	1:44:104:44:G	0/1:8:33:6:R
1997_GGCCGGGGACAGCAGCAGCGGGAACGAGGTAGAGG_NODE_2_length_288_cov_18.718750	93	.	G	A	55.62	PASS	NS=8:AN=1:DP=177:AS=TGGATCCCCTGGGGCCCCATCACTTCCTGCCTTGCTTTACAGCCACCCCC[G/A]AGGAGGTCTTATGTTCCCCTTTATAAAGAATGTGAACTCCAGGAACCAGC	GT:DP:GQ:EC:SG	0/1:10:24:4:R	0/1:54:84:26:R	0/1:19:76:13:R	0:28:111:0:G	1:21:60:21:A	0/1:11:1:2:G	1:32:86:32:A	1:2:3:2:A
517_GGCCGCCGGCCTGGTACATCCCTGGGGGAGAAAAG_NODE_2_length_176_cov_7.460227	129	.	A	G	63.75	PASS	NS=8:AN=1:DP=133:AS=GAATTTGCTCTTTTCTTTGCAAGGCACCCTGTAAGTCCGTCTGAGACTGG[A/G]TTGGTGCAACCACGAATAAATGTAGAGAACCTGGCCTTCTTGGCCAAGTT	GT:DP:GQ:EC:SG	0:20:87:0:A	0:25:102:0:A	0/1:11:47:7:R	0:25:102:0:A	0:12:66:0:A	0/1:17:52:8:R	0/1:19:15:5:R	0:4:39:0:A
3672_GGCCGCTCAGCCCGGCTTCCCCACAGGTAGGCTGT_NODE_2_length_282_cov_7.652482	136	.	G	A	111	PASS	NS=8:AN=1:DP=253	GT:DP:GQ:EC:SG	0:24:99:0:G	0:19:84:0:G	0:42:156:0:G	0:55:193:0:G	0/1:37:72:15:R	0/1:17:49:7:R	0:50:181:0:G	0:9:54:0:G
385_GGCCGCGCACGCGCACTTCCGCTTCCTGCGCTGAG_NODE_2_length_300_cov_9.533334	111	.	C	T	40.5	PASS	NS=8:AN=1:DP=80:AS=ACTCACGGTGATCCTCCGTACAACAGAAGGAAACAAGGCCTGGTCCTGAG[C/T]CATCTTCACAATCGCTAAGCTGGAGCCCACTGTTGCAGCCACTGTGTCAA	GT:DP:GQ:EC:SG	0/1:3:9:2:Y	0:7:48:0:C	0:8:51:0:C	0:26:105:0:C	0/1:19:34:7:Y	0/1:7:1:6:Y	0:5:45:0:C	0:5:31:0:C
8812_GGCCGCAGTTTCCTCAGGGAGAAGCAGCCAGCCAC_NODE_2_length_161_cov_8.900621	125	.	C	T	35.86	PASS	NS=7:AN=1:DP=32	GT:DP:GQ:EC:SG	0:4:39:0:C	0:1:30:0:C	0:7:48:0:C	0:1:30:0:C	0:2:33:0:C	.:0:0:0:N	0/1:11:26:4:Y	0:6:45:0:C
1263_GGCCGTGTACCTCTGTGCCAGTAGCTTAGCCACAG_NODE_2_length_296_cov_17.766891	137	.	G	C	64.38	PASS	NS=8:AN=1:DP=357	GT:DP:GQ:EC:SG	0/1:15:42:5:S	0/1:53:31:11:S	0/1:65:72:20:S	0/1:75:13:12:G	0/1:46:114:27:S	0:22:93:0:G	0/1:63:74:19:S	0/1:18:76:7:S
8855_GGCCGCGTCGGGCGTGGGCCTCCGCTTCCTCCCGC_NODE_2_length_274_cov_7.726277	46	.	T	C	27.12	PASS	NS=8:AN=1:DP=37	GT:DP:GQ:EC:SG	0:2:33:0:T	1:15:9:14:C	0:2:33:0:T	0:5:45:0:T	0/1:8:1:3:Y	0:2:33:0:T	0:2:33:0:T	0:1:30:0:T
5656_GGCCGCGCGGCGCCTTTGCGTAGTGCTGTCAGGAA_NODE_2_length_254_cov_12.078740	132	.	A	G	93.88	PASS	NS=8:AN=1:DP=207:AS=TCTGCCCCTGTGTACTAAGAGCTGCTGCAATTCGGCTGAGAACACGCGCC[A/G]GCTGACACGCGCCACCTAAGAGTTGTCTGGGTGTTGGTTATGAGACACAG	GT:DP:GQ:EC:SG	0:7:48:0:A	0:20:87:0:A	0:64:202:0:A	0/1:42:81:17:R	0:16:75:0:A	0:21:90:0:A	0:26:108:0:A	0:11:60:0:A
1553_GGCCGCCCTCTGCTCGCTCCTGGATGCTGATGCGA_NODE_2_length_234_cov_10.252137	39	.	G	A	58.75	PASS	NS=8:AN=1:DP=172	GT:DP:GQ:EC:SG	0/1:16:40:4:R	0:20:87:0:G	0/1:59:47:6:G	0/1:24:70:7:R	0/1:14:70:6:R	0/1:12:30:1:G	0:21:90:0:G	0/1:6:36:3:R
6202_GGCCGCAACAACTTCCGAGAAGTCCGCGGCTTCCT_NODE_2_length_341_cov_5.278593	109	.	G	T	29.75	PASS	NS=8:AN=1:DP=83:AS=AGACAAGAAGGCTCTCTGGTTAAATGGAGGGGCTGAATAGGTCAGAGGGG[G/T]AGAACACGGAGTGTCCAGCAGACATGGGGCATCTGGGGGCTCCACCTCCA	GT:DP:GQ:EC:SG	1:6:15:6:T	1:31:88:31:T	1:17:48:17:T	1:12:36:12:T	1:2:3:2:T	1:6:18:6:T	1:6:24:6:T	1:3:6:3:T
6917_GGCCGCACCGACTCTCCTCCTAGCAGAGGCCGTGC_NODE_2_length_174_cov_11.994253	26	.	G	A	56.5	PASS	NS=8:AN=1:DP=89	GT:DP:GQ:EC:SG	0:5:42:0:G	0:23:96:0:G	0/1:28:93:16:R	0:10:57:0:G	0:8:51:0:G	0/1:5:29:3:R	0:9:54:0:G	0:1:30:0:G
7004_GGCCGCCGCCCCTCCCGCCCTTTGCTCGCAGCTTT_NODE_2_length_215_cov_6.720930	81	.	A	G	81.62	PASS	NS=8:AN=1:DP=208:AS=TAGAAAAGCATTACCATAGAGTTCATATACATTTTACACAGTCCGGTATT[A/G]AGACGCCCAATTCAAGCCCAAGGGGAACAGCGAAGGGTCTTTCCCCCATG	GT:DP:GQ:EC:SG	0:18:81:0:A	0:36:135:0:A	0:40:147:0:A	0/1:26:7:5:R	0/1:23:91:13:R	0:17:78:0:A	0/1:43:72:16:R	0:5:42:0:A
457_GGCCGTGCGTCTCCCACTTCTGCTCCCGCGTCTGC_NODE_2_length_254_cov_21.066929	28	.	C	T	52.86	PASS	NS=7:AN=1:DP=75	GT:DP:GQ:EC:SG	0:4:39:0:C	0/1:19:56:7:Y	0/1:15:79:9:Y	0:23:96:0:C	.:0:0:0:.	0:6:45:0:C	0:2:33:0:C	0/1:6:22:3:Y
1104_GGCCGTTCACGAAGGGCAGATATGCCGAGCTCATT_NODE_2_length_223_cov_6.896861	116	.	C	G	70.75	PASS	NS=8:AN=1:DP=619:AS=GAAAAGGCCTCTTGCTATTCTCTTTTCTTTCTGCCTGAATGCGGTCAATT[C/G]GCACTTGCCAAAGCAAGGTTTCCCAGCACAAACTACAAAGCAGCAGCTCT	GT:DP:GQ:EC:SG	0/1:46:42:12:S	0/1:72:121:24:S	0/1:99:124:30:S	0/1:143:16:35:C	0/1:120:89:14:C	0/1:20:26:4:S	0:85:132:0:C	0/1:34:16:7:S
9194_GGCCGCGGCGGACAATGCCGGTGCGCGGTTACCTT_NODE_2_length_267_cov_16.397003	140	.	G	C	75.75	PASS	NS=8:AN=1:DP=256:AS=TGCAAGTAGAAAAAGGGATATAAAAACGGGATGACACAGACCGCACCAGA[G/C]TCAAACGGTAAGCCGAGGAGCAAAGGAAGGATGCTACCCCGCCTGTCAGA	GT:DP:GQ:EC:SG	0:18:81:0:G	0/1:52:105:31:S	0/1:54:94:26:S	0/1:53:93:23:S	1:23:66:23:C	1:8:21:8:C	1:39:114:39:C	0/1:9:32:7:S
6920_GGCCGCCCGATGCCCTGGTGACAGTGACAGTGGTC_NODE_2_length_289_cov_11.733564	104	.	T	C	82.88	PASS	NS=8:AN=1:DP=199:AS=CCTCCTGAACAAAAGATTGAAATTACATTTCAAGCATCGATTTTTTTTTC[T/C]CTCCAGAGACAAAAAAGTCAGCAAGTGCAAGGGCGGCCTTGCGAACGGCC	GT:DP:GQ:EC:SG	0/1:10:30:8:Y	0:49:178:0:T	0/1:41:71:19:Y	0:36:135:0:T	0/1:20:60:10:Y	0:12:63:0:T	1:28:90:28:C	0:3:36:0:T
3287_GGCCGCCGCTGCTTCGTGGAGGCCGCGGAGGTGGG_NODE_2_length_218_cov_7.513762	67	.	G	C	56.75	PASS	NS=8:AN=1:DP=664	GT:DP:GQ:EC:SG	0/1:45:71:14:S	0/1:124:22:33:S	0/1:115:15:28:S	0/1:106:76:37:S	0/1:101:72:35:S	0/1:41:77:14:S	0/1:102:57:16:G	0/1:30:64:10:S
5344_GGCCGGCTTGGACTGCGCCGGCATGCAGTGACCAT_NODE_2_length_140_cov_10.657143	11	.	A	G	9.86	q10	NS=7:AN=1:DP=30	GT:DP:GQ:EC:SG	1:2:3:2:G	1:1:0:1:R	1:14:39:14:G	1:5:12:5:G	1:4:9:4:G	1:2:3:2:G	1:2:3:2:G	.:0:0:0:.
5989_GGCCGCGCGGCACCACGGGATATAGAGTCCTTAGG_NODE_2_length_297_cov_6.572391	35	.	T	G	11	PASS	NS=6:AN=1:DP=28	GT:DP:GQ:EC:SG	1:2:3:2:G	1:6:15:6:G	1:9:24:9:G	1:5:12:5:G	1:3:6:3:G	.:0:0:0:.	1:3:6:3:G	.:0:0:0:.
9177_GGCCGGTTAGGCTGGACCTCTCCTATTGGCTCAGT_NODE_2_length_145_cov_7.186207	34	.	G	A	56.62	PASS	NS=8:AN=1:DP=89	GT:DP:GQ:EC:SG	0:6:45:0:G	0:5:42:0:G	0:45:162:0:G	0:13:66:0:G	0:9:54:0:G	0:3:36:0:G	0/1:5:12:4:R	0:3:36:0:G
8498_GGCCGGCACGAGCCAACTGAAGCTGTGGTTCCTCA_NODE_2_length_274_cov_5.000000	78	.	G	C	59.88	PASS	NS=8:AN=1:DP=148:AS=CCAGAGGATTATCATTTGGGGACTTGTTGGCTGAAGGAAGGAGCGTGCTT[G/C]TTTTTATAGGAACTCCAGTTCCTCGTTTTGTTCTCCTCGGGTTAGTCTCC	GT:DP:GQ:EC:SG	0/1:14:32:4:S	0:22:93:0:G	0/1:34:88:17:S	0/1:24:83:10:S	0:17:78:0:G	1:12:33:12:C	1:23:69:23:C	1:2:3:2:C
4612_GGCCGCAGTTTCCTCAGGAAGAAGCAGCCAGGCGC_NODE_2_length_310_cov_4.264516	206	.	G	A	48.25	PASS	NS=8:AN=1:DP=71	GT:DP:GQ:EC:SG	0:12:63:0:G	0:8:51:0:G	0:3:36:0:G	0:25:105:0:G	0/1:6:25:3:R	0:7:48:0:G	0/1:3:10:1:G	0:7:48:0:G
7287_GGCCGTGGGAGACAGGATGGGAAGGGAAATCAGCG_NODE_1_length_131_cov_56.541985	22	.	G	A	22.25	PASS	NS=8:AN=1:DP=315	GT:DP:GQ:EC:SG	0/1:27:22:7:R	0/1:7:23:1:G	0/1:11:8:3:R	0/1:59:18:11:G	0/1:67:4:16:R	0/1:30:51:11:R	0/1:62:28:17:R	0/1:52:24:14:R
10583_GGCCGCAGTTCATCGTCTGGTTTTCCGGGACTTTC_NODE_3_length_163_cov_18.435583	11	.	C	A	22.83	PASS	NS=6:AN=1:DP=15	GT:DP:GQ:EC:SG	0:1:30:0:C	.:0:0:0:.	0:2:33:0:C	0/1:6:21:1:C	0:2:33:0:C	.:0:0:0:.	1:3:9:3:A	1:1:11:1:C
4286_GGCCGGGCTGCTCCGGCCTCCGCGCCACGGGAACA_NODE_2_length_150_cov_9.606667	105	.	A	G	32.38	PASS	NS=8:AN=1:DP=102	GT:DP:GQ:EC:SG	0:3:36:0:A	0:18:52:0:A	0/1:18:4:3:R	0/1:22:22:5:R	0/1:16:16:4:R	0:3:36:0:A	0:17:48:0:A	0:5:45:0:A
1263_GGCCGTGTACCTCTGTGCCAGTAGCTTAGCCACAG_NODE_2_length_296_cov_17.766891	224	.	G	C	71.12	PASS	NS=8:AN=1:DP=294:AS=TCTGCCACACACAGGAGATCATCAAAGTAACCCCAGTAAACACAAATCAG[G/C]AGAGGTTTGGGCAGACATTTCTGTCACCTTCTAATGATTTCCATCCATCC	GT:DP:GQ:EC:SG	0/1:17:15:4:S	0/1:8:20:4:S	0/1:21:52:2:G	0:63:187:0:G	0:67:144:0:G	0:44:92:0:G	0/1:51:3:13:S	0/1:23:56:2:G
11170_GGCCGTTGGAGCTGGCCAATGGGCGCCGGGGGCAG_NODE_2_length_341_cov_24.791788	75	.	G	A	48.75	PASS	NS=8:AN=1:DP=185	GT:DP:GQ:EC:SG	0:1:30:0:G	0/1:67:77:37:R	0/1:57:76:27:R	0/1:17:60:9:R	0/1:11:56:6:R	0/1:3:15:2:R	0/1:28:46:9:R	0:1:30:0:G
10886_GGCCGAGCTCCCGGAAGTGGAGGGTTTTGTTTCCG_NODE_2_length_284_cov_21.359156	172	.	C	A	147.5	PASS	NS=8:AN=1:DP=363:AS=GAGGATACAATTATTAAATTATCCTTATACGATCTTCTTCTTAGCCCTTA[C/A]CACAACTTCAATGAACCGTGATCTTAGCAGTTGCAGGTTCTTACTCGACT	GT:DP:GQ:EC:SG	0:28:111:0:C	0:30:117:0:C	0:88:224:0:C	0:85:227:0:C	0:47:168:0:C	0:41:150:0:C	0:32:123:0:C	0/1:12:60:8:M
385_GGCCGCGCACGCGCACTTCCGCTTCCTGCGCTGAG_NODE_3_length_138_cov_10.028986	53	.	T	C	62.5	PASS	NS=8:AN=1:DP=127:AS=TGAGTCTGTTAAAGATTAAAAAAAAAACAAAAAACCCACTGCTGTCGAGT[T/C]GATTCCGATTCATGGCGACCCTATAGGACAGAGTAAAACTGCCCTTTAGA	GT:DP:GQ:EC:SG	0/1:5:13:2:Y	0:13:66:0:T	0:14:69:0:T	0:41:150:0:T	0/1:17:63:7:Y	0/1:4:22:2:Y	0:27:108:0:T	0/1:6:9:2:Y
2480_GGCCGCTGCCCGGGCTCAGCCTTAAGAGGCAGCAC_NODE_2_length_286_cov_5.671329	141	.	A	G	71.88	PASS	NS=8:AN=1:DP=277:AS=AGACAGTTACTATTAACGTCACTCCTCCCTCACAGGCTTCCCTGACTACA[A/G]AAAAACCTACAGATGACAGCTATTCCGTAATCCCTGGTTTACCCCTCAAG	GT:DP:GQ:EC:SG	0/1:16:13:3:A	0:40:147:0:A	1:51:92:51:G	0/1:62:46:27:R	1:23:66:23:G	1:22:66:22:G	1:49:93:49:G	0/1:14:52:8:R
3041_GGCCGGACTGGATGGCTCCCTTCCACTCTGGCACC_NODE_2_length_277_cov_29.711191	127	.	G	A	104.38	PASS	NS=8:AN=1:DP=296:AS=AGAAAATTAAGAGCAGAGAAGTTGCTCTTTTAAGAGGAAGTTAGTTTTCT[G/A]GACAAACGCCGGTACACAAAAACAAGAAAGAGAAGCAAAGTCTCACAGTT	GT:DP:GQ:EC:SG	1:14:39:14:A	1:39:114:39:A	1:42:126:42:A	0/1:68:75:27:R	0:52:184:0:G	0:22:93:0:G	1:40:120:40:A	0:19:84:0:G
4877_GGCCGTATCCTCCCCCGGCAGACAGCCCACCCCGG_NODE_2_length_245_cov_10.322449	68	.	T	C	32.38	PASS	NS=8:AN=1:DP=86	GT:DP:GQ:EC:SG	0/1:6:9:2:Y	1:14:39:14:C	1:22:63:22:C	0:23:96:0:T	1:6:15:6:C	1:3:6:3:C	1:11:30:11:C	1:1:1:1:T
2302_GGCCGTGAACGGGGGTCAGCGGGGAGCAGGGCGAG_NODE_2_length_202_cov_24.712872	46	.	C	T	92.5	PASS	NS=8:AN=1:DP=239	GT:DP:GQ:EC:SG	0:12:63:0:C	0/1:44:86:28:Y	0/1:54:69:41:Y	0:35:132:0:C	0:28:111:0:C	0:18:81:0:C	0:44:159:0:C	0:4:39:0:C
636_GGCCGCTTTCCTTCAGCCGCCTTCTCCGAGAGCCC_NODE_4_length_159_cov_27.364780	66	.	G	C	64.5	PASS	NS=8:AN=1:DP=531	GT:DP:GQ:EC:SG	0/1:71:93:41:S	0/1:58:77:23:S	0/1:64:38:16:S	0/1:105:92:51:S	0/1:87:74:36:S	0/1:37:51:11:S	0/1:96:46:30:S	0/1:13:45:5:S
4959_GGCCGGCCTCCTGCTGCGGCTCCCCTATTCCACGT_NODE_2_length_288_cov_4.333333	133	.	T	C	71.25	PASS	NS=8:AN=1:DP=181:AS=AGCATTAACCCACAGACCCCTGTTTCTACAGGAGATGAGACTTTCCTCCA[T/C]GCTTTTCTCCAATCCTTACCCAAGACCTCTTTCCAGGCCCTGACGTGTCC	GT:DP:GQ:EC:SG	0/1:16:77:11:Y	0/1:26:90:15:Y	0/1:19:28:6:Y	0:33:126:0:T	1:28:81:28:C	1:10:27:10:C	1:44:129:44:C	1:5:12:5:C
5480_GGCCGCTTTCCCAAGCCCTTCCAGCTCAAACTATG_NODE_2_length_286_cov_7.506993	265	.	G	A	62.14	PASS	NS=7:AN=1:DP=158	GT:DP:GQ:EC:SG	0:34:77:0:G	0:27:87:0:G	.:0:0:0:.	0:16:49:0:G	0:26:105:0:G	0:5:42:0:G	0:8:51:0:G	0/1:42:24:10:R
4881_GGCCGCTAACCAAAACGTCGACAGTTCGAACCCAC_NODE_2_length_252_cov_5.210318	86	.	T	C	48.5	PASS	NS=8:AN=1:DP=160:AS=AGTAAATTAACTATTTGCACCACACGGATATTTAGTCCACATATATTTCC[T/C]ACGAGCAGAAGCCTGAGGCAAGAGGCTGGCACCTGGGGGTCAAAGGCAAG	GT:DP:GQ:EC:SG	1:15:42:15:C	0/1:41:63:16:Y	0/1:35:55:12:Y	0:19:84:0:T	1:10:27:10:C	1:9:24:9:C	0/1:21:66:10:Y	1:10:27:10:C
6964_GGCCGCCCTCAAGGGGCGCCTCCGATCCCCTAGGA_NODE_2_length_294_cov_17.581633	279	.	T	C	41.86	PASS	NS=7:AN=1:DP=79	GT:DP:GQ:EC:SG	0:4:39:0:T	.:0:0:0:.	1:4:9:4:C	0:32:123:0:T	0/1:5:25:1:T	0/1:10:6:9:C	0/1:13:55:7:Y	1:11:36:11:C
4084_GGCCGACAGAGGGAACCCGATCCGATGTGGTTCTA_NODE_2_length_314_cov_20.640127	210	.	G	C	109.62	PASS	NS=8:AN=1:DP=516:AS=GAGATAATTAAATAATTATTTTTCCTGCATTATTTTCGTTCCCCCAAAGC[G/C]CCACACTATATACACCTATTTTTTCTCCATAACTGATTGCATGTGTGGTC	GT:DP:GQ:EC:SG	0/1:21:57:16:S	0/1:54:72:28:S	0/1:87:71:44:S	0:124:247:0:G	1:82:116:82:C	1:34:99:34:C	1:80:116:80:C	1:34:99:34:C
3783_GGCCGGGGGTGGCCTAGAGGTCTGTCCCAGCGCAC_NODE_2_length_308_cov_7.327922	217	.	G	A,C	58.12	PASS	NS=8:AN=2:DP=181:AS=ATCCTTGCACACCCAGGTCACCTGAAGTGAGAGGAACAACAAAAAAAAAA[G/A,C]GGTGGCCGGGGAAGGAGTCCATGAAGTTCTGCAAGTTGGATCTGGAGAGT	GT:DP:GQ:EC:SG	0:19:84:0:G	0:11:60:0:G	0/1:18:15:5:R	0:54:196:0:G	0/1:46:29:19:R	0/2:13:38:1:G	0/1:17:7:6:R	0:3:36:0:G
8377_GGCCGAGCTCATTGCGGGAAAGCGAAAGCAAAGGA_NODE_2_length_216_cov_5.601852	82	.	C	A	41.5	PASS	NS=6:AN=1:DP=34	GT:DP:GQ:EC:SG	.:0:0:0:.	0:5:45:0:C	0:12:63:0:C	0/1:7:27:3:M	0:2:36:0:C	.:0:0:0:.	0:3:36:0:C	0:5:42:0:C
1039_GGCCGAGGGAGTTTCTGGGCCGCTGAGTGGTGGAG_NODE_2_length_226_cov_17.163717	20	.	G	A	11.33	PASS	NS=6:AN=1:DP=27	GT:DP:GQ:EC:SG	.:0:0:0:.	1:11:30:11:A	1:8:21:8:A	1:1:3:1:G	1:4:9:4:A	1:2:3:2:A	1:1:2:1:G	.:0:0:0:N
3292_GGCCGAGATAAGCCAACAGCCTTGTCTCAGAAGTT_NODE_2_length_338_cov_26.553255	317	.	C	T	49.29	PASS	NS=7:AN=1:DP=128	GT:DP:GQ:EC:SG	0/1:18:65:12:Y	1:2:3:2:T	.:0:0:0:.	0/1:36:67:19:Y	1:33:96:33:T	1:18:54:18:T	1:9:27:9:T	1:12:33:12:T
1235_GGCCGGTTAGCTCAGTTGGTTAGAGCGTGGTGCTA_NODE_7_length_240_cov_5.387500	147	.	G	A	51.75	PASS	NS=8:AN=1:DP=112	GT:DP:GQ:EC:SG	0/1:10:2:2:G	0:23:96:0:G	0/1:23:33:6:R	0:18:81:0:G	0:12:66:0:G	0:8:51:0:G	0:17:55:0:G	0:1:30:0:G
10157_GGCCGAAAAGTGGCGGCGGGAGGCAAGCCCGGCAT_NODE_2_length_238_cov_11.033613	31	.	A	C	20.17	PASS	NS=6:AN=1:DP=50	GT:DP:GQ:EC:SG	1:3:6:3:C	1:15:26:14:C	1:17:48:17:C	1:11:30:11:C	1:3:6:3:C	.:0:0:0:.	.:0:0:0:.	1:1:5:1:A
8606_GGCCGGTCCTGGCACCATGTTGCTAACACAGGCAA_NODE_2_length_309_cov_13.022654	287	.	G	T	46.71	PASS	NS=7:AN=1:DP=66	GT:DP:GQ:EC:SG	1:6:15:6:T	.:0:30:0:G	0:4:39:0:G	0:19:84:0:G	0:16:75:0:G	1:12:33:12:T	0:6:45:0:G	0:3:36:0:G
167_GGCCGCGGACGGCAAGGAGGCGGGCCCGGAGCCTG_NODE_1_length_396_cov_35.785355	207	.	G	A	114.12	PASS	NS=8:AN=1:DP=4467:AS=CACGACATCTCTCCCCACAGTGCTTTATCAGCTTCCGAAGGGAGGTTCGC[G/A]TAGCTTCTTTAACCTTGTAGTTGCATCGATACACGTAAGCCCGGCTTGCG	GT:DP:GQ:EC:SG	0/1:337:26:104:G	0/1:1391:40:515:R	0:677:255:0:G	0:488:255:0:G	0/1:605:20:185:R	0/1:308:35:97:R	0/1:607:92:158:G	0:54:190:0:G
10454_GGCCGTGAAGACCTCCAGGCGCGCTGTTTGTAGCG_NODE_2_length_307_cov_31.205212	43	.	A	G	28.29	PASS	NS=7:AN=1:DP=72	GT:DP:GQ:EC:SG	.:0:0:0:.	1:16:48:16:G	1:18:51:18:G	0/1:7:15:6:R	1:10:27:10:G	1:2:3:2:G	1:18:51:18:G	1:1:3:1:A
2456_GGCCGGGTCCACCGCAGGGAACAAGCCTGTAGGGA_NODE_2_length_166_cov_19.692772	17	.	A	G	64.86	PASS	NS=7:AN=1:DP=141	GT:DP:GQ:EC:SG	0/1:6:28:3:R	0/1:17:94:9:R	1:36:72:35:G	0/1:30:79:11:R	0/1:15:81:8:R	0/1:18:13:7:R	0/1:19:87:11:R	.:0:0:0:.
2731_GGCCGACGAGAAGGCGGCTTCCAGGCTGCGACCCC_NODE_2_length_354_cov_12.912430	245	.	A	G	133	PASS	NS=8:AN=1:DP=367:AS=GCCGGTAGCAGAAAGGGAGTCGCTAATCTGGCCCTGACACTACTGCATTT[A/G]TAGGGTTACTGATAAGAACCTTTCTCAACGCAGAGGGCCTAGCTCTCTAT	GT:DP:GQ:EC:SG	0:22:96:0:A	0/1:34:109:21:R	0/1:49:101:28:R	0:84:224:0:A	1:58:143:58:G	1:38:114:38:G	0:70:210:0:A	0/1:12:67:8:R
1736_GGCCGCCAGGTGGCGCCCGACAACCTGCACGACCA_NODE_2_length_299_cov_10.351171	153	.	G	C	120.75	PASS	NS=8:AN=1:DP=425:AS=GAAATGCACCAACTGCTCCTTGGAAACCCTATGGAGCAGTTCTACTCTGT[G/C]CTATAGGGTCGCTATCAGTCGGAATCTACTCCACCGCAACCGGTATATAT	GT:DP:GQ:EC:SG	1:30:87:30:C	1:51:124:51:C	1:87:137:87:C	0:59:205:0:G	1:51:125:51:C	1:34:99:34:C	1:98:147:98:C	1:15:42:15:C
1333_GGCCGCGTCTGCTTCCCAGGCGTGGGGACCCACCG_NODE_2_length_187_cov_7.887701	179	.	G	A	33.5	PASS	NS=6:AN=1:DP=23	GT:DP:GQ:EC:SG	0:1:30:0:G	1:3:6:3:A	0:2:33:0:G	0:9:54:0:G	.:0:0:0:N	.:0:0:0:N	0:7:48:0:G	0:1:30:0:G
3351_GGCCGGTACTCAGGAAATGTTTGGACAAGTGAACC_NODE_2_length_194_cov_7.463918	154	.	A	G	41.5	PASS	NS=8:AN=1:DP=135	GT:DP:GQ:EC:SG	1:12:33:12:G	1:5:12:5:G	0/1:10:52:7:R	0/1:33:93:20:R	0/1:30:94:18:R	1:9:24:9:G	0/1:24:12:21:R	0/1:12:12:10:R
2513_GGCCGCCGCCTCTCCGCACCCTGCCGCGCACAAAG_NODE_2_length_243_cov_7.991769	41	.	G	A	26.62	PASS	NS=8:AN=1:DP=181	GT:DP:GQ:EC:SG	0/1:9:14:4:R	0/1:59:10:17:R	0/1:44:25:14:R	0/1:15:35:7:R	0/1:18:59:11:R	0/1:8:1:2:G	0/1:23:54:18:R	1:5:15:5:A
6860_GGCCGGGGGGAGGACACGTAGGAGAAACCAGCCGA_NODE_4_length_161_cov_14.850932	80	.	G	A	37.62	PASS	NS=8:AN=1:DP=113:AS=CAACTCACCTTCACCAGCCACTAGAGGACGCTCTGATTCCGGAGAAGGCC[G/A]GCTTCTTGGTAACTTCAGAAATGGAAATTTCCTAGGATTTCTTCCCTTTC	GT:DP:GQ:EC:SG	0/1:8:3:2:R	1:23:72:23:A	0/1:14:33:8:R	0/1:18:42:6:R	0/1:12:22:6:R	0/1:4:3:2:R	0:32:123:0:G	1:2:3:2:A
4962_GGCCGAGTGCCATGGGCAGAAACATTGACACATAC_NODE_3_length_173_cov_4.890173	68	.	G	C	45.71	PASS	NS=7:AN=1:DP=245	GT:DP:GQ:EC:SG	0:1:30:0:G	0/1:105:17:28:S	0/1:62:0:12:S	0/1:22:77:11:S	0/1:21:77:11:S	0/1:13:41:5:S	0:21:78:0:G	.:0:0:0:.
5178_GGCCGCTTGTTGACCTCTGTTGCATCTCTCCCCAT_NODE_2_length_251_cov_10.239044	143	.	T	C	42.25	PASS	NS=8:AN=1:DP=145:AS=CCCCAGAGCAGCCCTCTGACAGGGCCCATCACCTAGGGGGCTTGAGGAAC[T/C]TAGGCTTTCTTTTCTTTCTATTCCCTTAGGTAGGGAGAGGAAGGGGAGGG	GT:DP:GQ:EC:SG	0:9:54:0:T	1:12:33:12:C	1:27:87:27:C	0/1:23:21:6:Y	0/1:14:2:3:T	1:13:36:13:C	0/1:35:72:20:Y	1:12:33:12:C
7544_GGCCGCTCGCCAGACTGACCATGCACAGAAGGTAC_NODE_2_length_219_cov_7.237443	180	.	G	A	46.38	PASS	NS=8:AN=1:DP=86	GT:DP:GQ:EC:SG	0/1:14:52:7:R	0/1:5:15:1:G	0/1:16:67:11:R	0:13:66:0:G	0:15:75:0:G	1:5:15:5:A	1:13:39:13:A	0:5:42:0:G
4732_GGCCGCACCTTCCTCCCGTGGAAGCTGCTCGGCCC_NODE_3_length_177_cov_27.508474	160	.	T	C	29.5	PASS	NS=8:AN=1:DP=106	GT:DP:GQ:EC:SG	0/1:20:49:12:Y	1:1:14:1:T	1:3:6:3:C	0/1:34:55:16:Y	0/1:18:55:11:Y	0/1:7:6:2:T	0/1:7:4:3:Y	0/1:16:47:12:Y
11134_GGCCGCTCCTCGGAGGGCGTAGGGCGCCGAAGGGG_NODE_2_length_285_cov_8.652632	42	.	C	T	47.43	PASS	NS=7:AN=1:DP=59	GT:DP:GQ:EC:SG	0:1:30:0:C	0:27:84:0:C	0/1:13:56:9:Y	0:4:39:0:C	0:3:36:0:C	0:2:33:0:C	0:9:54:0:C	.:0:0:0:.
5871_GGCCGGCAGCTCGCGGTAAGAGCTCAAGACACCCA_NODE_2_length_237_cov_11.350211	36	.	G	A	39.75	PASS	NS=8:AN=1:DP=77	GT:DP:GQ:EC:SG	0:6:45:0:G	0/1:13:36:5:R	1:15:42:15:A	0:12:63:0:G	0:16:75:0:G	0/1:5:27:3:R	1:9:24:9:A	1:1:6:1:G
7079_GGCCGGGGGCTGCCGCGCTCTGGTGGGGTCGTGTT_NODE_2_length_288_cov_14.298611	139	.	C	T	119.5	PASS	NS=8:AN=1:DP=259:AS=GGAAGGACGGCGCGCTTGGAAAGTTTTCAAGGTCTGAAGAGCTCTATTTC[C/T]GGGGCTGAGAAGAACACTATCTTTTCCGGCTCAAAATAAAGATTTATGGC	GT:DP:GQ:EC:SG	0/1:16:45:6:Y	0:38:144:0:C	0:37:141:0:C	0:49:175:0:C	0:49:178:0:C	0/1:11:38:6:Y	0:55:196:0:C	0:4:39:0:C
9426_GGCCGGCAAGGGGGACTGAGCCAACAGAGAGACGT_NODE_2_length_234_cov_14.991453	37	.	G	A,C	27.17	PASS	NS=6:AN=2:DP=65	GT:DP:GQ:EC:SG	.:0:0:0:.	2:26:75:26:C	2:19:54:19:C	2:3:6:3:C	1/2:6:1:1,5:C	2:5:12:5:C	2:6:15:6:C	.:0:0:0:.
5752_GGCCGCTTAACCCTTCGCTCCCCGACACGCGCCGT_NODE_2_length_206_cov_7.131068	15	.	G	C	24.83	PASS	NS=6:AN=1:DP=27	GT:DP:GQ:EC:SG	0:2:33:0:G	0/1:7:47:4:S	0/1:10:28:3:S	0:4:39:0:G	0/1:2:1:1:G	.:0:0:0:.	0/1:2:1:1:G	.:0:0:0:.
7522_GGCCGAATCCGGCGGGGCGGCTGGCTGGTCGGGGC_NODE_2_length_333_cov_10.348349	145	.	C	T	89	PASS	NS=8:AN=1:DP=231:AS=AAGGCAAGATGTAAAATCTGGGCAATGAGTAAATGGTTGGTATCATTCTA[C/T]TTCTTCTCTTTTTGACATATTTAAAATAGATGCCATGTCCCCAGACTGAA	GT:DP:GQ:EC:SG	0/1:16:69:10:Y	0/1:34:78:16:Y	0:63:206:0:C	0:35:132:0:C	0/1:27:35:8:Y	1:9:24:9:T	0:40:150:0:C	1:7:18:7:T
46_GGCCGCGCTGTTTGATCCGCCGTTTTACCAGAGGC_NODE_2_length_228_cov_17.714912	22	.	A	C	16.71	PASS	NS=7:AN=1:DP=46	GT:DP:GQ:EC:SG	1:2:3:2:C	1:13:36:13:C	1:9:24:9:C	1:8:21:8:C	1:8:21:8:C	1:1:0:1:M	1:5:12:5:C	.:0:0:0:.
10031_GGCCGTGTACCTCTGTGCCAGCAGCTTAGACACAG_NODE_1_length_159_cov_21.735849	127	.	C	T	37	PASS	NS=8:AN=1:DP=94	GT:DP:GQ:EC:SG	0/1:2:11:1:C	0/1:38:40:10:Y	0/1:11:50:5:Y	0:17:78:0:C	0:15:42:0:C	0/1:7:39:5:Y	1:3:6:3:T	0:1:30:0:C
11147_GGCCGATGCCGCAGCGCTGCAAGGTAACTCAGACC_NODE_2_length_303_cov_11.320132	287	.	C	A	14.12	PASS	NS=8:AN=1:DP=34	GT:DP:GQ:EC:SG	1:4:12:4:A	1:1:5:1:A	1:5:15:5:A	1:7:18:7:A	1:9:24:9:A	1:1:9:1:C	1:6:18:6:A	1:1:12:1:C
3008_GGCCGGCGCCCCTTCACCGCGCTCTGGCTTCTGGG_NODE_2_length_273_cov_16.205128	42	.	T	C	44.62	PASS	NS=8:AN=1:DP=128	GT:DP:GQ:EC:SG	1:9:24:9:C	1:24:69:24:C	0/1:29:69:18:Y	0:21:90:0:T	0:9:54:0:T	0/1:9:35:5:Y	0/1:25:13:6:Y	1:2:3:2:C
6701_GGCCGTGTTCAGCTGTATTCAATTCTTTTCTACTC_NODE_1_length_204_cov_52.245098	46	.	A	T	15.14	PASS	NS=7:AN=1:DP=39	GT:DP:GQ:EC:SG	.:0:0:0:.	1:19:54:19:T	1:7:18:7:T	1:3:6:3:T	1:6:18:6:T	1:1:2:1:A	1:2:3:2:T	1:1:5:1:A
4195_GGCCGTTTGCCCCGCCTTCTCTCCTGCCATCAGCC_NODE_2_length_283_cov_14.204947	46	.	T	C	21.5	PASS	NS=8:AN=1:DP=75	GT:DP:GQ:EC:SG	1:2:3:2:C	1:32:93:32:C	1:4:9:4:C	0/1:13:6:12:C	1:7:18:7:C	1:5:12:5:C	1:11:30:11:C	1:1:1:1:T
9979_GGCCGCATGTGACTGGTGGCGTAGTGGTTAAGAGT_NODE_2_length_317_cov_15.987382	57	.	T	C	24.12	PASS	NS=8:AN=1:DP=58	GT:DP:GQ:EC:SG	0:3:36:0:T	1:15:10:14:C	1:2:3:2:C	0/1:19:9:3:T	1:8:21:8:C	0:4:39:0:T	0:6:45:0:T	0:1:30:0:T
5643_GGCCGTGCGCGGTTGCTCGCGCCTACGCTAAATGT_NODE_1_length_185_cov_25.783783	114	.	C	T	64.88	PASS	NS=8:AN=1:DP=1227:AS=AGCCTGGACCCTAAATCCCTAACCCCTCATGGCATCCTTTCACCGCTGAA[C/T]ACTACTCCATCCTGTGGATGTACCACACACCACAAGGCGGCACAGTCCGA	GT:DP:GQ:EC:SG	0/1:117:3:27:Y	0/1:250:137:51:C	0/1:293:177:54:C	0/1:151:7:36:C	0/1:144:16:34:C	0/1:59:14:12:Y	0/1:127:128:15:C	0/1:86:37:23:Y
721_GGCCGTCTAAGATGCATCAGTTGGTCTCAACCCAC_NODE_2_length_165_cov_4.987879	91	.	C	T	28.38	PASS	NS=8:AN=1:DP=39	GT:DP:GQ:EC:SG	0:2:33:0:C	0/1:2:6:1:C	0:5:42:0:C	0/1:12:17:4:Y	0:5:42:0:C	0/1:2:11:1:C	0/1:8:40:6:Y	0:3:36:0:C
2313_GGCCGACTTTCCGAGACGCGGGTCAGGACTGTGCT_NODE_2_length_180_cov_6.838889	11	.	G	C	9	q10	NS=6:AN=1:DP=24	GT:DP:GQ:EC:SG	.:0:0:0:N	.:0:0:0:.	1:3:6:3:C	1:6:15:6:C	1:2:3:2:C	1:3:6:3:C	1:9:24:9:C	1:1:0:1:C
2858_GGCCGACAAAGCGCGCCGCTGGGCCTGGGACAGTG_NODE_2_length_301_cov_6.611296	203	.	C	A	52.88	PASS	NS=8:AN=1:DP=339	GT:DP:GQ:EC:SG	0/1:21:61:16:M	0/1:39:45:14:M	0/1:40:71:24:M	0/1:75:38:56:M	0/1:55:64:37:M	0/1:31:64:23:M	0/1:69:69:35:M	0/1:9:11:3:M
7419_GGCCGGGTGTTTGCATAGAACGTTATCCGCTGAAT_NODE_2_length_176_cov_9.522727	122	.	C	G	30	PASS	NS=8:AN=1:DP=90	GT:DP:GQ:EC:SG	1:1:10:1:C	0/1:11:25:9:S	0/1:11:26:4:S	0/1:17:43:14:S	0/1:20:60:15:S	0/1:9:48:6:S	0/1:17:19:14:S	1:4:9:4:G
9289_GGCCGCCACGGCACGACTCCGACCGCTCTGCGCGC_NODE_2_length_292_cov_22.099316	273	.	T	C	47	PASS	NS=8:AN=1:DP=85	GT:DP:GQ:EC:SG	0:5:42:0:T	0:1:30:0:T	0/1:10:37:7:Y	0:38:141:0:T	0:6:45:0:T	0/1:4:17:1:T	0/1:16:22:6:Y	0:5:42:0:T
5469_GGCCGGGCTTGGACTTCATCGTGGGGACAGTGATG_NODE_2_length_293_cov_17.566553	131	.	T	C	99.62	PASS	NS=8:AN=1:DP=252:AS=GGCTAACTGAACTGCGGGCTTTAGTTCAGTCCTCACATATCCATGCTTCA[T/C]TGAGTACTTCCTCTGCTCCAGGCACTATCTGGGGACATAAGAATAAGACC	GT:DP:GQ:EC:SG	0/1:7:30:3:Y	0/1:53:91:32:Y	0:67:217:0:T	0:45:165:0:T	0/1:35:95:20:Y	0:12:63:0:T	0:24:102:0:T	0/1:9:34:7:Y
2858_GGCCGACAAAGCGCGCCGCTGGGCCTGGGACAGTG_NODE_2_length_301_cov_6.611296	272	.	G	A,T	24.25	PASS	NS=8:AN=2:DP=546	GT:DP:GQ:EC:SG	0/2:50:48:14:K	0/2:19:14:4:K	0/1/2:27:15:3,6:K	0/2:185:31:59:K	0/2:87:54:32:K	0/2:64:2:13:G	0/1/2:81:11:7,18:K	0/2:33:19:5:G
3003_GGCCGATTCTCAGGCTTCCCGACCGCCAGCGTGAA_NODE_4_length_170_cov_14.694118	31	.	A	C,G	24.29	PASS	NS=7:AN=2:DP=66	GT:DP:GQ:EC:SG	2:7:18:7:G	2:16:45:16:G	2:17:48:17:G	0/1/2:7:11:1,5:S	2:8:21:8:G	2:5:12:5:G	2:6:15:6:G	.:0:0:0:.
9004_GGCCGTGACGGACCAACGGCCAGATGGGCTCAACT_NODE_4_length_231_cov_14.290043	174	.	G	A	67.62	PASS	NS=8:AN=1:DP=324	GT:DP:GQ:EC:SG	0/1:31:89:20:R	0/1:24:87:15:R	0/1:59:82:33:R	0/1:90:90:47:R	0/1:43:76:27:R	0/1:20:5:5:R	0/1:49:81:24:R	0/1:8:31:6:R
8408_GGCCGCAGCATCAGGGGAAAGGTGAGAAGAGAAAG_NODE_2_length_252_cov_14.111111	36	.	C	T	36.38	PASS	NS=8:AN=1:DP=84	GT:DP:GQ:EC:SG	0:6:45:0:C	0/1:30:61:14:Y	1:28:81:28:T	0:7:48:0:C	0:3:36:0:C	0/1:3:5:2:Y	1:5:12:5:T	1:2:3:2:T
10655_GGCCGGGAGCTCCAGGGCGCGCTGTCCCGCGTCAC_NODE_2_length_247_cov_6.032389	150	.	T	C	76.12	PASS	NS=8:AN=1:DP=248:AS=GAAAGTCTGTCTCTCTATGTAAAACAGGAAGTGGTTTCGATGAGTTGCAG[T/C]TCAGATAATAAGAAAAGTTTTTGAGACTAAAGAGCAGACAAGGCGCGGGG	GT:DP:GQ:EC:SG	0/1:31:89:17:Y	0/1:45:77:18:Y	0/1:64:89:32:Y	0:34:129:0:T	1:17:51:17:C	0/1:9:34:7:Y	1:42:122:42:C	1:6:18:6:C
3247_GGCCGCGAGAGCCAATCCGCTTGCACGGGAGGCCC_NODE_2_length_160_cov_6.825000	115	.	G	A	23.88	PASS	NS=8:AN=1:DP=76	GT:DP:GQ:EC:SG	0:6:45:0:G	0:4:39:0:G	0/1:10:7:2:R	0/1:13:19:3:R	0/1:15:46:5:R	0/1:6:2:2:R	0/1:18:11:4:R	0/1:4:22:2:R
4047_GGCCGCCGCATCAGTCTTGTTATTGCCAGAGCTGG_NODE_2_length_197_cov_5.243655	98	.	C	T	37.25	PASS	NS=8:AN=1:DP=115:AS=GTCGCCCAAGATCCCCAGGTCAGCAGAAGGAAGTGGTGCTAGATCCCATA[C/T]CTACAAATAGGGAAACTGAGGCTCAGAGCTGGGCAGGGGGCTCGGAAGCC	GT:DP:GQ:EC:SG	1:11:30:11:T	1:22:66:22:T	1:36:105:36:T	0/1:10:1:9:T	1:12:33:12:T	1:3:6:3:T	1:19:54:19:T	1:2:3:2:T
1905_GGCCGCTTGGTAGGAGAACTGTCGATCGGGCCCGG_NODE_2_length_325_cov_12.655385	200	.	C	G	47.38	PASS	NS=8:AN=1:DP=282	GT:DP:GQ:EC:SG	0/1:19:47:5:S	0/1:31:79:11:S	0/1:38:76:12:S	0/1:62:16:13:S	0/1:52:39:12:S	0/1:17:64:6:S	0/1:50:30:6:C	0/1:13:28:4:S
9171_GGCCGTCCACTCAATTCTGATTCACAGCAAAAATA_NODE_2_length_156_cov_12.083333	23	.	T	G	27.29	PASS	NS=7:AN=1:DP=38	GT:DP:GQ:EC:SG	0/1:4:10:1:T	1:1:1:1:T	0:3:36:0:T	0:15:60:0:T	0/1:9:41:4:K	.:0:0:0:.	0:4:39:0:T	0/1:2:4:1:T
8064_GGCCGTCATGGCGCTGCAGGAGGCGTGCGAGGCCT_NODE_2_length_295_cov_18.528814	114	.	C	T	112.75	PASS	NS=8:AN=1:DP=258:AS=CTGCTTTCCACCCACATAGTGCTTTGATATACCTTTGACAGTTTTATTCA[C/T]CTTTCATAATTGGTGGAGCATTTAATGCATTTGAAATGCTTAAGGACCAG	GT:DP:GQ:EC:SG	0:15:72:0:C	0:67:211:0:C	0:54:190:0:C	0:49:178:0:C	0/1:21:38:6:Y	0:12:63:0:C	1:32:99:32:T	0:8:51:0:C
2063_GGCCGTTTGGGTGCAACCCCCCCCCTGAATTTTCC_NODE_2_length_325_cov_18.692308	314	.	G	A	33.12	PASS	NS=8:AN=1:DP=57	GT:DP:GQ:EC:SG	0:7:48:0:G	1:6:15:6:A	1:3:6:3:A	0/1:19:22:2:G	0:1:30:0:G	0:6:45:0:G	0:5:42:0:G	0:10:57:0:G
2143_GGCCGGTCAGGGCGGGTGTGTGAGATTTTGTGTGT_NODE_2_length_292_cov_8.363013	276	.	C	T	43.62	PASS	NS=8:AN=1:DP=97	GT:DP:GQ:EC:SG	0/1:14:31:11:Y	0/1:7:14:6:Y	0:9:54:0:C	0:30:117:0:C	0/1:7:22:5:Y	1:8:21:8:T	0:12:63:0:C	1:10:27:10:T
9661_GGCCGGAAGCCGGAGATCGCGAGACGCGACTCGGT_NODE_2_length_227_cov_9.854626	219	.	C	T	5	q10	NS=6:AN=1:DP=17	GT:DP:GQ:EC:SG	1:4:12:4:T	.:0:0:0:.	1:1:6:1:C	0/1:6:5:5:Y	1:2:3:2:T	1:2:1:2:C	.:0:0:0:N	1:2:3:2:T
404_GGCCGGTTCCGCAGACCCCTCCATTTTACCCAAGG_NODE_2_length_207_cov_6.101449	89	.	G	A	64	PASS	NS=8:AN=1:DP=139	GT:DP:GQ:EC:SG	0:10:57:0:G	0:12:63:0:G	0:38:141:0:G	0:23:96:0:G	0/1:23:3:5:R	0:18:84:0:G	0/1:9:23:4:R	0:6:45:0:G
2560_GGCCGGAAGACGGTGGGGCCGGCCACAGCGCGGGG_NODE_1_length_299_cov_65.020065	299	.	A	G	54.88	PASS	NS=8:AN=1:DP=263	GT:DP:GQ:EC:SG	0/1:68:76:8:A	0:5:45:0:A	0/1:43:38:12:R	0/1:90:62:16:A	0:16:68:0:A	0/1:17:33:2:A	0:17:63:0:A	0:7:54:0:A
1417_GGCCGCGGGCGGCAAGGAGGCGGGCCCGGATCCTG_NODE_2_length_223_cov_8.937220	50	.	G	T	215.5	PASS	NS=8:AN=1:DP=4343	GT:DP:GQ:EC:SG	1:216:208:216:T	1:1002:225:1002:T	1:1056:225:1056:T	1:1063:225:1061:T	1:317:225:317:T	1:245:225:244:T	1:294:225:294:T	1:150:166:150:T
83_GGCCGAGGACGCGCTGCTGGGGGGACACCACCAAA_NODE_2_length_268_cov_13.802238	34	.	A	C	24.43	PASS	NS=7:AN=1:DP=45	GT:DP:GQ:EC:SG	1:6:27:6:C	1:22:66:22:C	1:11:45:11:C	1:1:12:1:A	1:1:6:1:C	1:1:6:1:A	1:3:9:3:C	.:0:0:0:.
3634_GGCCGCCCTCTCGTGGCCAGTGGGGAGGAGCGCAA_NODE_2_length_280_cov_12.817857	92	.	G	A	39.88	PASS	NS=8:AN=1:DP=138	GT:DP:GQ:EC:SG	0/1:8:33:1:G	1:15:42:15:A	0/1:10:6:2:G	0:50:178:0:G	0/1:20:5:4:R	0/1:8:24:1:G	0/1:26:1:5:R	0:1:30:0:G
1690_GGCCGCAGCTTCCTCAGGGAGAAGTAGCCAGACAC_NODE_2_length_232_cov_7.926724	153	.	A	G	89.62	PASS	NS=8:AN=1:DP=244	GT:DP:GQ:EC:SG	0/1:10:32:1:A	0:23:99:0:A	0/1:30:50:12:R	0:43:156:0:A	0:51:181:0:A	0:16:75:0:A	0/1:53:107:4:A	0/1:18:17:3:A
1364_GGCCGTTTCCACAGGCCACGCGCTCGCCCGCGATC_NODE_2_length_265_cov_7.064151	157	.	G	C	48	PASS	NS=8:AN=1:DP=194:AS=GGAGTAAAGCTCGTCCTGCAAACTCAGGCGTCTTAATCCTGATCTCTGCT[G/C]AATTTCCTCTCCCCAAAATGAACGTCTCGCGCCTAGTTTGACCCTTAAGG	GT:DP:GQ:EC:SG	0/1:12:15:2:G	0/1:29:94:14:S	0/1:53:64:19:S	0/1:19:57:7:S	0/1:31:37:8:S	1:6:15:6:C	0/1:40:93:27:S	1:4:9:4:C
10031_GGCCGTGTACCTCTGTGCCAGCAGCTTAGACACAG_NODE_1_length_159_cov_21.735849	44	.	T	A	23.5	PASS	NS=6:AN=1:DP=65	GT:DP:GQ:EC:SG	.:0:0:0:.	0/1:31:1:4:W	0/1:14:92:8:W	0/1:8:6:2:W	0/1:7:3:2:T	0:1:30:0:T	1:4:9:4:A	.:0:0:0:.
2856_GGCCGCCGGCTCCGAAGTCCCTGGGGGCTCAGCTG_NODE_2_length_296_cov_20.672297	234	.	C	T,G	30.25	PASS	NS=8:AN=2:DP=72	GT:DP:GQ:EC:SG	0/2:7:20:3:S	0:6:45:0:C	0:7:48:0:C	0/1:14:29:4:Y	0/1:16:4:3:Y	0:4:39:0:C	0:9:54:0:C	0/1/2:9:3:1,2:C
3854_GGCCGGAAAAGCGCTGCAAAAACGCAAGGGGTTGT_NODE_2_length_323_cov_9.089784	240	.	G	A	131.88	PASS	NS=8:AN=1:DP=329:AS=TGGGTACTCGGGCTGAGGGGAGGAAGGCTTTGGAGTCATATCCAGGCAGC[G/A]GCAAGGCAGGTTCCCTCCGGTGATGCTCTGGAATCTTTGGCCTGACTAAG	GT:DP:GQ:EC:SG	0:22:93:0:G	0/1:12:27:5:R	0:72:208:0:G	0:92:225:0:G	0:36:135:0:G	0:29:114:0:G	0:53:187:0:G	0:13:66:0:G
1248_GGCCGCTATTTGCATACGGCTTATTTGCATGGAAC_NODE_2_length_237_cov_6.059072	7	.	G	A	19.17	PASS	NS=6:AN=1:DP=21	GT:DP:GQ:EC:SG	.:0:0:0:N	0:1:30:0:G	1:2:3:2:A	0:9:54:0:G	1:1:5:1:G	.:0:17:0:G	0/1:7:20:3:R	1:1:3:1:G
3035_GGCCGCCGCCACGATGGAGAAGGGCAGGAGGCCGC_NODE_2_length_323_cov_16.396284	50	.	C	T	29.5	PASS	NS=6:AN=1:DP=65	GT:DP:GQ:EC:SG	.:0:0:0:.	1:15:42:15:T	1:26:75:26:T	1:4:9:4:T	1:12:33:12:T	1:2:3:2:T	1:6:15:6:T	.:0:0:0:.
5100_GGCCGACCATCAGCATGGAGCATATCAGTGCCTTC_NODE_2_length_325_cov_23.843077	117	.	T	G	100.38	PASS	NS=8:AN=1:DP=272	GT:DP:GQ:EC:SG	0/1:8:34:4:K	1:63:128:62:G	0/1:48:91:26:K	0:42:153:0:T	0/1:31:92:20:K	0/1:9:37:4:K	0:52:184:0:T	0:19:84:0:T
7150_GGCCGGGCTGGTCCAGGAAGTCCCTCCGACCACCG_NODE_2_length_318_cov_5.424528	282	.	G	T,C	45.75	PASS	NS=8:AN=2:DP=179	GT:DP:GQ:EC:SG	0/2:14:56:7:S	0/1/2:9:23:1,1:G	0/2:18:17:5:S	0/2:50:68:22:S	0/2:31:27:10:S	0/2:21:72:13:S	0/2:24:53:15:S	0/2:12:50:8:S
5855_GGCCGTAGCACGCAAGCGCGCGACATCAGTCCCCG_NODE_2_length_338_cov_12.707101	36	.	A	C	18.71	PASS	NS=7:AN=1:DP=50	GT:DP:GQ:EC:SG	.:0:0:0:.	1:18:51:18:C	1:21:60:21:C	1:3:6:3:C	1:2:3:2:C	1:1:0:1:M	1:4:9:4:C	1:1:2:1:A
2858_GGCCGACAAAGCGCGCCGCTGGGCCTGGGACAGTG_NODE_2_length_301_cov_6.611296	261	.	G	C	26.25	PASS	NS=8:AN=1:DP=650	GT:DP:GQ:EC:SG	0/1:59:54:20:S	0/1:29:29:8:S	0/1:30:0:6:S	0/1:211:10:67:S	0/1:112:63:43:S	0/1:71:14:13:G	0/1:101:21:21:G	0/1:37:19:5:G
5327_GGCCGGTTCCGCAGAGCCCTCCATTTTACCCGTGG_NODE_2_length_216_cov_5.384259	25	.	C	G	35.5	PASS	NS=8:AN=1:DP=37	GT:DP:GQ:EC:SG	0:5:42:0:C	0:6:45:0:C	0/1:4:25:3:S	0:8:51:0:C	1:1:1:1:C	0:5:42:0:C	0:7:48:0:C	0:1:30:0:C
3558_GGCCGGGCAACGGCGGAGTAGCCGCCCACCTGTCT_NODE_2_length_179_cov_6.765363	113	.	C	T	30.75	PASS	NS=8:AN=1:DP=84	GT:DP:GQ:EC:SG	1:6:15:6:T	1:12:45:12:T	1:15:45:15:T	1:24:66:23:T	1:10:27:10:T	1:6:21:6:T	1:9:24:9:T	1:2:3:2:T
142_GGCCGTCTACACGCTCTGCCGGCCCTCCTCTTTCA_NODE_2_length_301_cov_9.631229	152	.	A	G	108.25	PASS	NS=8:AN=1:DP=405:AS=TCCCTATTCCACCCTCCACCATCCACCCCTCCCCCAAAAAAGCCGACAAA[A/G]TCTCCGAAGTACGTGAAGCCCACTGCAAACAATCCTTTCTACAGTTCGCG	GT:DP:GQ:EC:SG	1:15:42:15:G	0/1:49:73:28:R	0/1:75:57:30:R	0:71:212:0:A	0:69:206:0:A	1:41:101:41:G	1:74:112:74:G	0:11:63:0:A
10560_GGCCGTGGGGCCCGAGAGTCCGAGGCCGGCGGGAG_NODE_2_length_278_cov_7.251799	81	.	G	A	63.12	PASS	NS=8:AN=1:DP=145:AS=ATGAAAATTCATCAAAAATAATGAAAAATTCTTTGTTTCTAACTGTTGTA[G/A]TAAGAACACCTTTGAGTTCAAAGACATCCATGAATCTACAAATAACCCAA	GT:DP:GQ:EC:SG	0/1:2:4:1:G	0/1:55:96:31:R	0:31:120:0:G	0:23:96:0:G	0/1:4:18:3:R	0:9:54:0:G	0:17:78:0:G	0:4:39:0:G
4784_GGCCGCGGCGAAGCCGGGCAGCTGCGGGTCGGTTG_NODE_2_length_284_cov_5.471831	147	.	C	T	48.86	PASS	NS=7:AN=1:DP=113:AS=TAAATGTATTTATGTAGTACATACATACACGTGTGGAAAGCCTGGTGGCG[C/T]AGTGGTTAAGTGCTACAGCTGCTAATCAAAAGGCTGGCAGTTCGAATCCA	GT:DP:GQ:EC:SG	1:6:15:6:T	1:13:42:13:T	1:24:72:24:T	1:22:63:22:T	1:18:54:18:T	1:7:21:7:T	1:23:75:23:T	.:0:0:0:.
3671_GGCCGGCGGCAGCCGCTGCTTGGTGGAGGCCGCGG_NODE_2_length_200_cov_7.645000	108	.	C	G	49.33	PASS	NS=6:AN=1:DP=62	GT:DP:GQ:EC:SG	0/1:24:100:14:S	0:6:45:0:C	0:1:30:0:C	.:0:0:0:.	0/1:4:14:1:C	.:0:0:0:.	0:2:33:0:C	0/1:25:74:18:S
4327_GGCCGTTCAGAAGAGCCCTCCATTTTCCTCATGGA_NODE_2_length_222_cov_4.648649	133	.	C	T	48.12	PASS	NS=8:AN=1:DP=125:AS=CTCTACCCACTGGGGAGCGGTCCAGCCAGAAGCCTCCCCCGTTTCATCTC[C/T]AGGCTCTCTCTCAGGCCCCTCATACTTGTGATGTGTCTCAGGGGTAGAAT	GT:DP:GQ:EC:SG	0:7:48:0:C	0/1:18:11:3:C	0/1:9:21:3:Y	0:44:159:0:C	0:29:64:0:C	0/1:2:4:1:C	0/1:10:33:1:C	0:6:45:0:C
1263_GGCCGTGTACCTCTGTGCCAGTAGCTTAGCCACAG_NODE_2_length_296_cov_17.766891	71	.	A	G	39.38	PASS	NS=8:AN=1:DP=191	GT:DP:GQ:EC:SG	0/1:5:21:4:R	0/1:66:22:52:R	0/1:38:61:20:R	0/1:32:51:13:R	0/1:21:54:12:R	0/1:8:36:6:R	0/1:19:64:12:R	0/1:2:6:1:A
8367_GGCCGAGGGCCCAGGTCCCCGGGCCGCCTCTGAGT_NODE_2_length_206_cov_8.975728	61	.	C	T	52.5	PASS	NS=8:AN=1:DP=182:AS=CTGATCACATATCCTGGCTCCTGATGCCCAGCCAGACCCCTCCGTTCATA[C/T]CCAGTGGGCCCCCCCGCCCCCATGAGTCCTTCAGGCCTGGGCAGGTACTC	GT:DP:GQ:EC:SG	1:22:63:22:T	1:26:75:26:T	1:63:116:63:T	1:24:47:23:T	1:19:54:19:T	0/1:7:8:6:Y	1:19:54:19:T	1:2:3:2:T
9963_GGCCGTTTTGAATTGGACAATCATATAGTCCACTA_NODE_2_length_146_cov_6.513699	45	.	C	T	30.62	PASS	NS=8:AN=1:DP=36	GT:DP:GQ:EC:SG	0:1:30:0:C	0:5:42:0:C	0:4:39:0:C	0/1:12:34:1:C	0:3:36:0:C	1:1:2:1:C	0/1:7:26:3:Y	0:3:36:0:C
935_GGCCGCTTCCAAGACTGCTTCTCCCGCAGCCTTTT_NODE_2_length_204_cov_11.504902	32	.	C	T	18.25	PASS	NS=8:AN=1:DP=64	GT:DP:GQ:EC:SG	1:2:3:2:T	1:12:33:12:T	1:17:54:17:T	1:17:20:16:T	1:2:3:2:T	1:3:6:3:T	1:9:24:9:T	1:2:3:2:T
167_GGCCGCGGACGGCAAGGAGGCGGGCCCGGAGCCTG_NODE_1_length_396_cov_35.785355	124	.	G	A	156	PASS	NS=8:AN=1:DP=3777	GT:DP:GQ:EC:SG	0/1:60:37:14:R	0/1:1622:151:330:G	0/1:1077:221:128:G	0:236:255:0:G	0/1:272:194:38:G	0/1:156:128:22:G	0/1:346:211:36:G	0:8:51:0:G
7824_GGCCGTCAGCTAGTCCAGGTTCCTCATTTGCAGAT_NODE_2_length_299_cov_9.183947	30	.	C	T	40.17	PASS	NS=6:AN=1:DP=47	GT:DP:GQ:EC:SG	.:0:0:0:.	0/1:18:72:9:Y	0:14:69:0:C	0:8:51:0:C	1:2:6:2:T	0:1:30:0:C	0/1:4:13:2:Y	.:0:0:0:.
1468_GGCCGGGCAGAGCTGCGTTCAGCTTCACAGCCAGG_NODE_2_length_189_cov_25.164021	180	.	T	C	41.62	PASS	NS=8:AN=1:DP=373	GT:DP:GQ:EC:SG	0/1:21:45:9:Y	0/1:86:41:29:Y	0/1:61:44:19:Y	0/1:60:17:17:Y	0/1:52:66:20:Y	0/1:26:69:15:Y	0/1:59:44:20:Y	0/1:8:7:2:T
9765_GGCCGTTGTCAGAATCAAGCAGAGCTTTCCTGACA_NODE_2_length_236_cov_16.415255	51	.	C	A	17.25	PASS	NS=8:AN=1:DP=56:AS=TGCTGCTGCTGTGGCTACCGGGTGGTGTCTCAGGTAAGAGGAGAAGGGGG[C/A]TAATGGGCTGGCTTGGGGTGGGGGAGGGGATGGCTAAGGGGATGGGAGCT	GT:DP:GQ:EC:SG	1:3:6:3:A	1:8:24:8:A	1:7:18:7:A	0/1:10:3:9:M	1:13:36:13:A	1:1:15:1:C	1:11:30:11:A	1:3:6:3:A
7327_GGCCGCTCGCCAGGGCCGGTGGGAAGCGGGGCCAG_NODE_2_length_294_cov_6.285714	47	.	A	T	27	PASS	NS=8:AN=1:DP=75	GT:DP:GQ:EC:SG	1:10:27:10:T	1:24:75:24:T	1:12:36:12:T	1:6:15:6:T	1:10:27:10:T	1:2:6:2:T	1:10:27:10:T	1:1:3:1:T
4563_GGCCGGGCTGGCTGGCGAGGGCACTGCTCGGCCAA_NODE_2_length_298_cov_8.268456	240	.	C	T	89.25	PASS	NS=8:AN=1:DP=198:AS=CACCCATGAGGAGGAGACCGCACTGGTTAACCCTCTGGTCTACCAGGCCC[C/T]GTTCCCAGGTTGCAGCAGCGAGACAAACTGTTGCTCAAGATAATCCCTCA	GT:DP:GQ:EC:SG	0/1:17:57:9:Y	0/1:9:33:7:Y	0:18:81:0:C	0:54:190:0:C	0/1:22:47:17:Y	0:20:87:0:C	0:41:150:0:C	0/1:17:69:10:Y
6946_GGCCGGAAACCCCGCCATCCATATATTTTTCATAC_NODE_2_length_324_cov_15.611111	128	.	G	A	47.25	PASS	NS=8:AN=1:DP=109:AS=AGAAACTATAATTTACACATGGCAAAAGCTGGTGGGGGAGGGCAGTGCTC[G/A]TTTCTTTCCAAATCCATTCAATGATTGATGCCTACTTTCTTATCAAAATG	GT:DP:GQ:EC:SG	0:13:66:0:G	0/1:22:79:11:R	1:11:30:11:A	0:22:77:0:G	1:15:48:15:A	0/1:10:20:3:R	1:13:39:13:A	0/1:3:19:2:R
30_GGCCGAGCAGGATGAAGAACTAGGACAATTACCGG_NODE_2_length_255_cov_9.713725	60	.	A	C	29.71	PASS	NS=7:AN=1:DP=79:AS=GCTCTCCGTGTCTGCCCACATGACACCTCTGCTGCGCCCCAGAAGGCCAC[A/C]TGTCAGCCTGCCCACAGCCGTTGAAGTGGCAAGGCAGAAAATGGAAAGTG	GT:DP:GQ:EC:SG	1:2:3:2:C	1:28:84:28:C	1:13:36:13:C	0/1:10:7:9:M	1:7:21:7:C	1:2:6:2:C	1:17:51:17:C	.:0:0:0:.
8395_GGCCGGGCAACCGTGGATGCACTACCTCCAGTTCC_NODE_2_length_213_cov_6.910798	34	.	A	T	19.29	PASS	NS=7:AN=1:DP=51	GT:DP:GQ:EC:SG	1:2:6:2:T	1:13:36:13:T	1:11:30:11:T	1:4:9:4:T	1:6:15:6:T	1:6:15:6:T	1:9:24:9:T	.:0:0:0:.
10846_GGCCGCTGCAGGGTTCCAACCGCTACCCAAGTTGC_NODE_2_length_227_cov_12.872247	14	.	C	T	21.5	PASS	NS=8:AN=1:DP=43	GT:DP:GQ:EC:SG	0:2:33:0:C	1:18:51:18:T	1:5:12:5:T	0:10:57:0:C	1:3:6:3:T	1:1:4:1:C	1:3:6:3:T	1:1:3:1:C
10340_GGCCGTGACCGTCTTGCGCTCGGCGTGCTCCCTCC_NODE_2_length_321_cov_11.607476	65	.	C	T	31.12	PASS	NS=8:AN=1:DP=94:AS=AATTATGTTGATTTTCATTTCTTATCGTCCGTATCGTTTTCCGGTGCACG[C/T]TTATTATTTTTCCAAATCGATACAAACTGTTAAAAGCAAAGAACACGCTG	GT:DP:GQ:EC:SG	1:1:14:1:C	1:23:72:23:T	1:24:69:24:T	0/1:12:1:11:T	1:10:27:10:T	1:2:3:2:T	1:20:60:20:T	1:2:3:2:T
10652_GGCCGGGATTCCTCCAGTCTCAGTCAGACCATTAA_NODE_4_length_167_cov_6.155689	92	.	G	C	80	PASS	NS=8:AN=1:DP=194	GT:DP:GQ:EC:SG	0:35:132:0:G	0:10:57:0:G	0:14:69:0:G	0:33:126:0:G	0:30:92:0:G	0:18:81:0:G	0/1:19:32:6:S	0/1:35:51:4:G
7275_GGCCGTGACCTTGTATCAACAAGCCGAGGAGTGCC_NODE_2_length_141_cov_8.971631	60	.	C	G	59.88	PASS	NS=8:AN=1:DP=113	GT:DP:GQ:EC:SG	0:5:42:0:C	0/1:25:108:16:S	0/1:25:99:14:S	0/1:20:92:12:S	1:9:30:9:G	0/1:8:23:3:S	1:15:42:15:G	0/1:6:43:4:S
7386_GGCCGGGCCCCAGTGTCCGGAGGATCCTTCCCCAG_NODE_2_length_322_cov_5.742236	175	.	T	G	77.62	PASS	NS=8:AN=1:DP=220:AS=CCAGCTGATAATACCCGGAAAAATACTCGCAGTAGTCGCAACGGCCTGGG[T/G]TCATTTCACCTCGATTTACCCCGCGTACCCGGTTTTGTCTAGGAGTGGAA	GT:DP:GQ:EC:SG	1:18:51:18:G	0:22:99:0:T	0:38:144:0:T	0:28:114:0:T	1:60:95:60:G	0/1:10:24:4:K	0/1:42:61:26:K	0:2:33:0:T
907_GGCCGGAGCGGAGTCGCCAACAATAACGCTGCCCC_NODE_2_length_297_cov_25.552189	16	.	C	T	12.83	PASS	NS=6:AN=1:DP=30	GT:DP:GQ:EC:SG	1:1:5:1:C	1:5:12:5:T	1:7:18:7:T	1:2:3:2:T	1:7:18:7:T	.:0:0:0:N	1:8:21:8:T	.:0:0:0:.
9456_GGCCGGGACGGCGCCTGGAGTCGCTCTGGCCGCGG_NODE_2_length_223_cov_11.071749	146	.	G	A	157	PASS	NS=8:AN=1:DP=444:AS=CAAGCCCCTTTGCGAAGGGAGAGGTCCCACAACACTGCTTCCTATGAAAA[G/A]TGACTCAGCATGACTGGGCACCGCCACCTCCAAATTTGGGCATGAGCGGG	GT:DP:GQ:EC:SG	0/1:29:69:18:R	0:47:168:0:G	0:92:220:0:G	0:76:213:0:G	0:83:214:0:G	0:23:96:0:G	0:81:210:0:G	0:13:66:0:G
10771_GGCCGCGAATCCGGAACATTTTACTGGAGAGAGGA_NODE_2_length_355_cov_19.394365	315	.	A	G	45.12	PASS	NS=8:AN=1:DP=108:AS=AGAAACCCCTACAAATGGGCTTGCTATTCATCTTGGAAGTCAAGCCCTGC[A/G]GCAACTGCCTATCGCCGAGCTGAGACATATTACCCAAATACAACGCAACG	GT:DP:GQ:EC:SG	0/1:13:43:6:R	0:3:36:0:A	1:1:0:1:A	0/1:25:66:12:R	1:18:51:18:G	1:12:33:12:G	0:21:90:0:A	1:15:42:15:G
8377_GGCCGAGCTCATTGCGGGAAAGCGAAAGCAAAGGA_NODE_2_length_216_cov_5.601852	56	.	G	A	12.5	PASS	NS=6:AN=1:DP=33	GT:DP:GQ:EC:SG	.:0:0:0:.	1:5:12:5:A	0/1:10:5:3:R	0/1:8:34:4:R	0/1:3:9:2:R	.:0:0:0:.	1:3:6:3:A	1:4:9:4:A
6701_GGCCGTGTTCAGCTGTATTCAATTCTTTTCTACTC_NODE_1_length_204_cov_52.245098	52	.	G	A	31.71	PASS	NS=7:AN=1:DP=67	GT:DP:GQ:EC:SG	.:0:0:0:N	0/1:29:45:5:G	0/1:11:21:2:G	0:4:39:0:G	0:7:48:0:G	0:1:19:0:G	0/1:14:20:9:R	0:1:30:0:G
2150_GGCCGGGGTCGGGAAGGGAGGGACTGGCGGGAGCC_NODE_2_length_274_cov_4.167883	174	.	C	G	25	PASS	NS=7:AN=1:DP=61:AS=GTACGTATGAGAGTGCGAGGCGTGAGCGGTGTGGCGGGTTGAGGGTCTGC[C/G]CCGGGCACAGGAGGCTGTGCACGCCAATGGCGAATGGGGCTGTGCCTGGC	GT:DP:GQ:EC:SG	1:5:12:5:G	1:1:13:1:C	1:14:39:14:G	1:18:51:18:G	1:7:18:7:G	1:5:12:5:G	1:11:30:11:G	.:0:0:0:N
6637_GGCCGATATGAATTCAAACCTCAGTGTAGAAATCT_NODE_2_length_286_cov_16.912588	148	.	T	A	70	PASS	NS=8:AN=1:DP=416	GT:DP:GQ:EC:SG	1:19:54:19:A	1:28:81:28:A	0/1:86:39:33:W	0/1:78:30:28:W	0:80:209:0:T	0/1:38:65:19:W	0/1:75:50:29:W	0/1:12:32:5:W
9077_GGCCGGTCCCCCCAAAGTCATCCAGGCGCCTCCAT_NODE_2_length_286_cov_9.339161	173	.	A	C	68.12	PASS	NS=8:AN=1:DP=164:AS=ATAGGGTCGCTGTGGCTTGGAATCAACTCGACAGCAGTGGTTTGGTTTTA[A/C]TGAGAAGAAAAATCAAGGAGTAAATCAGATGTGGAAGGTAACGTGCCACA	GT:DP:GQ:EC:SG	0:20:87:0:A	0/1:14:10:3:A	1:10:27:10:C	0:56:196:0:A	1:18:60:18:C	0:17:78:0:A	1:23:69:23:C	0/1:6:18:1:A
4206_GGCCGCGGGAAGAGGAGCGCGCTGTCTTTCCGGCT_NODE_2_length_268_cov_13.817164	37	.	G	T	13.43	PASS	NS=7:AN=1:DP=34	GT:DP:GQ:EC:SG	1:1:3:1:G	1:8:24:8:T	1:13:39:13:T	1:4:9:4:T	1:1:9:1:G	.:0:0:0:N	1:6:4:6:T	1:1:6:1:G
9177_GGCCGGTTAGGCTGGACCTCTCCTATTGGCTCAGT_NODE_2_length_145_cov_7.186207	111	.	C	T	39.25	PASS	NS=8:AN=1:DP=71	GT:DP:GQ:EC:SG	0:5:42:0:C	1:4:9:4:T	0:10:57:0:C	0/1:20:38:2:C	0/1:13:27:2:C	0:7:51:0:C	0:9:54:0:C	0:3:36:0:C
5377_GGCCGGGCAACACTGCATGGGATTTCCTCTGCCAG_NODE_2_length_195_cov_9.220512	97	.	C	G	46.62	PASS	NS=8:AN=1:DP=95	GT:DP:GQ:EC:SG	0/1:9:24:1:C	0/1:7:28:3:S	0:18:81:0:C	0/1:15:42:5:S	0/1:26:90:14:S	0:5:42:0:C	0:2:33:0:C	0/1:13:33:4:S
1450_GGCCGAGGGGGCGGCGCCCTCTGGTGGCAGATTGC_NODE_2_length_313_cov_11.702875	34	.	C	G	12.14	PASS	NS=7:AN=1:DP=41	GT:DP:GQ:EC:SG	.:0:0:0:.	1:11:30:11:G	1:7:18:7:G	0/1:9:2:8:S	1:5:12:5:G	1:4:9:4:G	1:4:9:4:G	1:1:5:1:C
5743_GGCCGGCTGGGAGTAAAAGCAGTTCTTACAGGGCA_NODE_2_length_326_cov_20.328220	174	.	C	T	77.62	PASS	NS=8:AN=1:DP=216:AS=ACTCCTGCAGCTTATGTTTTAGTATTAATAAACAAAGCACATGAGTAAAT[C/T]ATAAAGTATATTAGAAGGTACGTGTCCCATGGAAAAAATAAAACCGGGTA	GT:DP:GQ:EC:SG	1:15:42:15:T	0/1:39:92:24:Y	1:40:107:40:T	0/1:40:49:11:Y	0:33:126:0:C	0/1:7:22:3:Y	0:34:129:0:C	0/1:8:54:5:Y
8812_GGCCGCAGTTTCCTCAGGGAGAAGCAGCCAGCCAC_NODE_2_length_161_cov_8.900621	82	.	A	G	18.88	PASS	NS=8:AN=1:DP=34	GT:DP:GQ:EC:SG	1:2:3:2:G	0:2:33:0:A	0/1:11:21:3:R	0:6:45:0:A	1:2:1:2:A	1:1:9:1:A	0/1:5:33:3:R	0/1:5:6:2:R
9003_GGCCGAGCCTGGGCCAGCCCCGGGGCGCCCCCCAT_NODE_2_length_275_cov_17.603636	52	.	T	C	33.12	PASS	NS=8:AN=1:DP=150	GT:DP:GQ:EC:SG	0/1:7:13:2:Y	0/1:39:57:3:T	0/1:29:56:8:Y	0/1:30:29:6:Y	0/1:13:56:5:Y	0/1:6:16:2:Y	0/1:24:37:6:Y	0/1:2:1:1:T
2621_GGCCGGCCCCGCAGGTGCTCCGCAGCCCCGGAGGA_NODE_2_length_327_cov_10.363914	120	.	A	T	25.12	PASS	NS=8:AN=1:DP=81:AS=CTGAGGCACAGGACAAGGGGGAACTTTCCCAAGGTTTCACAGGCACCAAG[A/T]GGCAAGGCACTTGAACAGAAGCTCCGAGGAGAGAGAATTGGCCACGAGGC	GT:DP:GQ:EC:SG	1:11:30:11:T	1:10:27:10:T	1:24:69:24:T	0/1:13:6:12:T	1:5:12:5:T	1:4:9:4:T	1:13:48:13:T	1:1:0:1:W
5123_GGCCGCCCCTTTGTTTTCATGCACTTGTTCTGCGG_NODE_2_length_272_cov_6.941176	32	.	T	C	10.83	PASS	NS=6:AN=1:DP=12	GT:DP:GQ:EC:SG	1:1:7:1:T	1:2:3:2:C	1:1:6:1:T	0:1:30:0:T	.:0:0:0:.	1:6:15:6:C	1:1:4:1:T	.:0:0:0:.
4011_GGCCGGCCCCTCTCCTCGCCACCTGCCCGCTACAC_NODE_2_length_387_cov_3.232558	125	.	C	A	32.25	PASS	NS=8:AN=1:DP=92:AS=ACATGCAATTGTTGAATAACCAAACTGCATCTTAAGTGTGTGGAGTAGCC[C/A]GAACTGAAAGAACGTGTAAAATGTAGGTAAAGGAAAGCATGAGGTCAACC	GT:DP:GQ:EC:SG	1:1:3:1:C	1:29:84:29:A	1:29:84:29:A	1:7:18:7:A	1:13:39:13:A	1:6:15:6:A	1:5:12:5:A	1:2:3:2:A
10032_GGCCGGTTGTTCCTCCTGCTTCTGTGTAGCCTGAT_NODE_2_length_151_cov_15.344371	76	.	C	T	68.62	PASS	NS=8:AN=1:DP=201:AS=ACGGAAGCCGATCACCATGGATCTCCCATGGAGCCCGTGGTAGGCTCAAA[C/T]CACAGACCTTTTGGTTAGAAGCTAAGCGCTTAACCACTGAATCAACAGGA	GT:DP:GQ:EC:SG	0:9:54:0:C	0/1:21:56:9:Y	0/1:62:1:12:C	0:21:93:0:C	0:27:108:0:C	0:14:69:0:C	0:44:162:0:C	1:3:6:3:T
7419_GGCCGGGTGTTTGCATAGAACGTTATCCGCTGAAT_NODE_2_length_176_cov_9.522727	132	.	C	A,G	24.38	PASS	NS=8:AN=2:DP=66	GT:DP:GQ:EC:SG	0:1:30:0:C	0/2:10:42:5:S	0/1/2:8:3:3,2:M	0/1/2:9:5:1,7:R	0/2:18:77:9:S	0/1/2:9:21:1,6:S	0/2:9:14:7:S	2:2:3:2:G
4573_GGCCGTGGGGCGGAGAGCCGGGGTACGCACCTGGG_NODE_2_length_308_cov_3.512987	228	.	G	C	89.88	PASS	NS=8:AN=1:DP=247:AS=ATGACCTCTGGGGTGACCTGTGACCCATTCCAGTGGGGTTAAGGTGTCCT[G/C]CTCACACTGCCCCTGCCTGGAGGCCTGGCCCTGGCCCGGGGTGAATTGGG	GT:DP:GQ:EC:SG	1:23:66:23:C	0:34:129:0:G	0:60:201:0:G	0/1:51:92:33:S	0/1:26:88:13:S	1:9:24:9:C	0/1:40:80:17:S	0:4:39:0:G
4485_GGCCGAAGCTAGGATCACAGCAGGAGGAGGCAATG_NODE_2_length_335_cov_18.501493	170	.	G	T	109	PASS	NS=8:AN=1:DP=248:AS=AGGTTTCCTTTAATATTATTCTTTAAACTGTACTTACATACTCTATACTG[G/T]ATATATATTTGTATACTTGTATTTGTATGTAATATAAATATATATTTCAC	GT:DP:GQ:EC:SG	0/1:19:90:11:K	0:25:102:0:G	0/1:27:92:18:K	0:64:217:0:G	0:42:153:0:G	0:15:72:0:G	0/1:41:89:19:K	0/1:15:57:7:K
2147_GGCCGGGGCGGGGTGGTCCACCGTGGTGGTGCCGC_NODE_2_length_238_cov_4.857143	34	.	A	C	15.88	PASS	NS=8:AN=1:DP=49	GT:DP:GQ:EC:SG	1:3:6:3:C	1:11:30:11:C	1:11:33:11:C	1:8:21:8:C	1:4:9:4:C	1:4:9:4:C	1:7:18:7:C	1:1:1:1:A
8010_GGCCGTGGGCGGGCGAGCGAAGGACGAGCCTCTGC_NODE_2_length_303_cov_12.475247	193	.	G	A	112.75	PASS	NS=8:AN=1:DP=268	GT:DP:GQ:EC:SG	0:23:99:0:G	0/1:36:14:5:G	0:50:181:0:G	0:47:168:0:G	0:52:184:0:G	0:13:66:0:G	0:37:138:0:G	0/1:10:52:5:R
5945_GGCCGAGTGCTACGAGCAGCTAGGCCAGCTGCATC_NODE_2_length_247_cov_22.327936	34	.	G	A	22.38	PASS	NS=8:AN=1:DP=185	GT:DP:GQ:EC:SG	0/1:14:22:2:G	0/1:45:29:21:R	0/1:33:15:9:R	0/1:36:2:8:G	0/1:6:16:4:R	0/1:13:27:2:G	0/1:34:29:14:R	0:4:39:0:G
8677_GGCCGGACCCAGCCCCTGCACGTCGTTGGCGGGTC_NODE_2_length_327_cov_13.376146	101	.	A	C	25.14	PASS	NS=7:AN=1:DP=62:AS=TTAGGGAAGCCGACTGCCACATCGTTCTTCCCCAGGAGCGGCTGGTGTTT[A/C]GAACCATCGACCTTTCGGTTAGCAGCCGAGCGCTTTAGTCACTGGGCCAC	GT:DP:GQ:EC:SG	1:1:2:1:A	1:10:27:10:C	1:17:51:17:C	1:12:36:12:C	1:5:12:5:C	1:4:9:4:C	1:13:39:13:C	.:0:0:0:.
9342_GGCCGCTAGGGGCTGCTGCCCCGCTGCTCTGCGGC_NODE_2_length_303_cov_7.848185	158	.	T	C	62.25	PASS	NS=8:AN=1:DP=175:AS=TATGACCCTTCCTTCACCTGCTCACCTGCCCTTGACCCTCCAATTGTTTC[T/C]TTAAATTCTGTGCTGAGGTGAGTGCCTCATTGGCCTCACCCTGTCAGCTC	GT:DP:GQ:EC:SG	1:15:42:15:C	0/1:19:44:8:Y	0/1:22:41:8:Y	0:48:171:0:T	1:26:75:26:C	1:8:21:8:C	1:33:95:33:C	1:4:9:4:C
721_GGCCGTCTAAGATGCATCAGTTGGTCTCAACCCAC_NODE_2_length_165_cov_4.987879	109	.	T	C	10.71	PASS	NS=7:AN=1:DP=38	GT:DP:GQ:EC:SG	0/1:5:5:2:Y	.:0:17:0:T	1:6:15:6:C	0/1:9:3:2:Y	0/1:5:22:3:Y	1:4:9:4:C	1:6:15:6:C	1:3:6:3:C
10148_GGCCGCACAGTAGAAAACCGGCATATTCTAACTCT_NODE_2_length_151_cov_6.887417	112	.	T	C	23.86	PASS	NS=7:AN=1:DP=52	GT:DP:GQ:EC:SG	1:6:15:6:C	0:1:33:0:T	1:6:15:6:C	0/1:19:74:11:Y	1:7:18:7:C	1:3:6:3:C	.:0:0:0:.	0/1:10:6:9:Y
6425_GGCCGTCTGCATCCTCAGGTTCCACAACCACAGAT_NODE_2_length_349_cov_17.346704	44	.	C	G	43.17	PASS	NS=6:AN=1:DP=50	GT:DP:GQ:EC:SG	.:0:0:0:.	0/1:20:63:7:S	0/1:19:81:8:S	0:3:36:0:C	0/1:3:10:1:C	0:2:33:0:C	0:3:36:0:C	.:0:0:0:.
6238_GGCCGCGGGCTTTCTCCCGTGGAGGGGCGAGGAGG_NODE_2_length_168_cov_10.154762	29	.	T	G	12.75	PASS	NS=8:AN=1:DP=52	GT:DP:GQ:EC:SG	1:4:9:4:G	1:9:24:9:G	1:7:18:7:G	0/1:11:0:10:G	1:2:3:2:G	1:9:24:9:G	1:8:21:8:G	1:2:3:2:G
631_GGCCGCTCACCGAAGGCTTAGAGGTTCAAATGCAC_NODE_2_length_267_cov_7.033708	166	.	A	G	53	PASS	NS=8:AN=1:DP=144	GT:DP:GQ:EC:SG	0/1:6:46:4:R	0/1:14:24:12:R	0/1:40:84:14:R	0/1:30:105:15:R	0/1:17:60:12:R	0/1:15:7:13:R	1:14:39:14:G	0/1:8:59:5:R
9003_GGCCGAGCCTGGGCCAGCCCCGGGGCGCCCCCCAT_NODE_2_length_275_cov_17.603636	75	.	T	C	20.38	PASS	NS=8:AN=1:DP=182	GT:DP:GQ:EC:SG	0/1:14:15:2:T	0/1:36:54:3:T	0/1:37:22:8:Y	0/1:37:5:6:Y	0/1:22:23:5:Y	0/1:8:3:2:Y	0/1:24:23:6:Y	0/1:4:18:1:T
9177_GGCCGGTTAGGCTGGACCTCTCCTATTGGCTCAGT_NODE_2_length_145_cov_7.186207	65	.	C	G	45.12	PASS	NS=8:AN=1:DP=144	GT:DP:GQ:EC:SG	0:13:66:0:C	0/1:7:36:5:S	0/1:45:49:5:C	0/1:36:56:3:C	0:15:72:0:C	0:6:48:0:C	0/1:12:9:2:C	0/1:10:25:1:C
8232_GGCCGTGGGGGACGCGGTGGAGAGGGGCCCGGGCC_NODE_2_length_247_cov_17.506073	215	.	T	C	67.5	PASS	NS=8:AN=1:DP=158	GT:DP:GQ:EC:SG	1:19:54:19:C	1:1:0:1:C	0/1:13:8:3:T	0:49:175:0:T	0:21:93:0:T	0:8:51:0:T	0:33:132:0:T	0/1:14:27:5:Y
6820_GGCCGTGCCCGCCTGGAGTTGGCCTCCATGGCTGC_NODE_3_length_143_cov_6.188811	106	.	A	G	45.75	PASS	NS=8:AN=1:DP=79	GT:DP:GQ:EC:SG	0:1:30:0:A	1:19:54:19:G	0:14:69:0:A	0/1:11:27:1:A	0:12:63:0:A	0:8:51:0:A	0:13:66:0:A	1:1:6:1:A
5377_GGCCGGGCAACACTGCATGGGATTTCCTCTGCCAG_NODE_2_length_195_cov_9.220512	113	.	G	A	47.5	PASS	NS=8:AN=1:DP=73	GT:DP:GQ:EC:SG	0:11:60:0:G	0:3:36:0:G	0/1:13:28:5:R	0:9:54:0:G	0:28:111:0:G	0:1:36:0:G	0:1:30:0:G	0/1:7:25:1:G
5918_GGCCGGGCCAGGTCTCTCTGCTTTAGGGAAAGAGC_NODE_2_length_287_cov_5.282230	205	.	G	A,T	36.5	PASS	NS=8:AN=2:DP=68	GT:DP:GQ:EC:SG	0:5:42:0:G	0/2:16:12:2:G	0/2:13:35:4:K	0:9:54:0:G	0:9:54:0:G	0:3:36:0:G	0/1/2:12:29:1,1:G	0:1:30:0:G
8370_GGCCGCTTGAAGGATGGGGAGGGCGGGGCGGCGAA_NODE_2_length_296_cov_4.030406	132	.	T	C	13	PASS	NS=7:AN=1:DP=23	GT:DP:GQ:EC:SG	1:1:9:1:C	1:5:12:5:C	1:11:33:11:C	1:1:5:1:C	1:3:6:3:C	1:1:12:1:T	1:1:14:1:T	.:0:0:0:.
9004_GGCCGTGACGGACCAACGGCCAGATGGGCTCAACT_NODE_4_length_231_cov_14.290043	217	.	C	T	8.5	q10	NS=6:AN=1:DP=24	GT:DP:GQ:EC:SG	1:3:6:3:T	.:0:0:0:N	1:8:24:8:T	0/1:7:10:6:Y	1:3:6:3:T	1:2:1:2:C	.:0:0:0:N	1:1:4:1:C
8064_GGCCGTCATGGCGCTGCAGGAGGCGTGCGAGGCCT_NODE_3_length_283_cov_11.816255	294	.	T	A	29.67	PASS	NS=6:AN=1:DP=22	GT:DP:GQ:EC:SG	0:5:42:0:T	.:0:0:0:.	0:5:42:0:T	0:2:33:0:T	0/1:3:16:1:T	.:0:0:0:N	1:4:9:4:A	0:3:36:0:T
9087_GGCCGGGTGACAGACTCTGGCCAGGCAGTCTCTTT_NODE_2_length_226_cov_13.008849	91	.	C	T	145.5	PASS	NS=8:AN=1:DP=384:AS=GTTCCAGAAGTCTGCTTACAATTAGCCTCCAGCTCCAGTCCCTCCACCAG[C/T]AAGGCTAGGAATGTGTTGAGCTCTAGCCTCTGATCAGGGAAATCTCCAGG	GT:DP:GQ:EC:SG	0:29:114:0:C	0:66:207:0:C	0/1:60:88:29:Y	0:45:165:0:C	0:87:219:0:C	0:28:111:0:C	0:58:200:0:C	0:11:60:0:C
8421_GGCCGTTTTCTGCCATCCTCCTGCCCGGCAGCCGC_NODE_2_length_259_cov_5.011583	141	.	G	A	8.29	q10	NS=7:AN=1:DP=13:AS=GGGGTGCCAAGCCCAAGGACAATCCTTTCAGGAGGGGCAGGGCTGGAGAG[G/A]ACTATATTGGCAGCTCTTTTGGTTTTTTGGGCAGGAAAAGGAAATTAACT	GT:DP:GQ:EC:SG	1:1:3:1:G	1:4:1:4:A	.:0:0:0:N	0/1:4:3:3:R	1:1:12:1:G	1:1:11:1:G	1:1:14:1:G	1:1:14:1:G
9095_GGCCGACTGCGCAGCAGCGCCGCGCTCTGGATTTC_NODE_2_length_253_cov_31.577076	160	.	A	G	134.5	PASS	NS=8:AN=1:DP=430:AS=GGGCAGTGTTGTCTGCTCCCCTGTTCCCCCACTCCTCAAAGCTCTCTTTT[A/G]CAGAGGACACATGTATTTTCAAGCTTTCACGATTGTAGTTGCCATTCTTT	GT:DP:GQ:EC:SG	1:47:141:47:G	1:38:111:38:G	1:33:96:33:G	0:96:227:0:A	1:69:146:69:G	0/1:32:83:14:R	1:85:152:85:G	0:30:120:0:A
9147_GGCCGCAGCTCCTCGACCTCACCTTCTGCTGCCGT_NODE_2_length_212_cov_13.283019	203	.	G	C	34.62	PASS	NS=8:AN=1:DP=61	GT:DP:GQ:EC:SG	0:1:30:0:G	1:3:6:3:C	0/1:2:9:1:G	0:23:96:0:G	0:9:54:0:G	0/1:6:2:2:G	0:14:72:0:G	0/1:3:8:2:S
9944_GGCCGCCAAGAGGAGGCTCCTTAAGGAGCGGATCT_NODE_2_length_246_cov_7.756098	252	.	G	A	16	PASS	NS=8:AN=1:DP=34	GT:DP:GQ:EC:SG	1:2:3:2:A	1:1:14:1:G	1:7:18:7:A	0/1:9:7:2:G	0:7:48:0:G	0:1:30:0:G	0/1:3:0:2:R	0/1:4:8:3:R
471_GGCCGAGTCTGAAGCCGCGGGAAAGAGGAGGCTCC_NODE_2_length_266_cov_4.928571	190	.	G	C	73.25	PASS	NS=8:AN=1:DP=184:AS=AGTCCAAGGGAAAGTGAACGTCCCAGCCACTGGGCGGAGCCCTCTGCGTC[G/C]CCACGCGGAATCCGGCCCTTCCTGCGCCGTTTGGCGCAGAACTCAGAAGG	GT:DP:GQ:EC:SG	0:18:81:0:G	1:26:75:26:C	1:36:100:36:C	0:34:132:0:G	1:28:81:28:C	1:11:30:11:C	1:27:78:27:C	1:4:9:4:C
7463_GGCCGTGGAGACTTCTGAAATTGAGTGCTACCATA_NODE_2_length_222_cov_6.783784	160	.	G	A	34.88	PASS	NS=8:AN=1:DP=55	GT:DP:GQ:EC:SG	0/1:3:14:2:R	0:5:42:0:G	0/1:4:24:3:R	0:11:60:0:G	0/1:15:61:8:R	0/1:7:22:1:G	0/1:8:49:5:R	0/1:2:7:1:G
1468_GGCCGGGCAGAGCTGCGTTCAGCTTCACAGCCAGG_NODE_2_length_189_cov_25.164021	138	.	A	T	39.62	PASS	NS=8:AN=1:DP=1240	GT:DP:GQ:EC:SG	0/1:62:56:22:W	0/1:343:13:99:A	0/1:249:66:67:A	0/1:175:0:53:A	0/1:133:88:24:A	0/1:75:58:30:W	0/1:182:25:52:A	0/1:21:11:5:W
8278_GGCCGATCTCAGGAACTCTCTGTGTTTTTAGGAAG_NODE_2_length_268_cov_15.421641	201	.	G	A	111.62	PASS	NS=8:AN=1:DP=222:AS=GCCATCCAATCATCTATTTCCTTTTCATTAGAAAACTCAGCATTTACATC[G/A]CAGCAAGAGACATTTAAAACCCCAAGCCTGCGGCTGCTTCCCCACTTGTC	GT:DP:GQ:EC:SG	0:12:63:0:G	0/1:16:94:9:R	0:21:90:0:G	0:45:162:0:G	0:58:202:0:G	0:13:66:0:G	0:39:144:0:G	0/1:18:72:7:R
7850_GGCCGCCCACCAACTAACACCACCAGCACCACCGC_NODE_1_length_214_cov_20.411215	121	.	G	A	36	PASS	NS=7:AN=1:DP=109	GT:DP:GQ:EC:SG	.:0:0:0:.	0/1:30:57:10:R	0/1:33:75:13:R	0/1:9:53:5:R	0/1:18:30:2:G	0/1:9:30:1:G	0/1:8:3:2:R	0/1:2:4:1:G
2103_GGCCGATTCTGACTCACAGCGACCCTATGCACAAC_NODE_2_length_282_cov_19.946808	234	.	C	T	77.12	PASS	NS=8:AN=1:DP=171	GT:DP:GQ:EC:SG	0/1:11:14:2:C	0/1:14:50:8:Y	0:30:93:0:C	0:42:153:0:C	0:22:93:0:C	0:14:69:0:C	0:17:78:0:C	0:21:67:0:C
9159_GGCCGCGACCCCGGGCTTTTCCCGCAGGCCCGAGC_NODE_2_length_169_cov_6.378698	78	.	G	C	53.12	PASS	NS=8:AN=1:DP=132:AS=GGCGGGGAGACCTGGAGGGGCTGGGCTGAGGGGAGAGACTGTGCGAGGGG[G/C]GCCGGAGGGCCAGGGATCTTAACTGGTGCCGTCTCAAGTCCTTCAAGGAA	GT:DP:GQ:EC:SG	0/1:13:49:7:S	0/1:16:40:7:S	0/1:20:58:11:S	0:39:144:0:G	1:14:39:14:C	1:7:18:7:C	1:22:69:22:C	1:1:8:1:G
4147_GGCCGCAGCCTCTGCGGAGCTGCGCGGGAAGCGGC_NODE_2_length_313_cov_8.188498	63	.	C	G	8.71	q10	NS=7:AN=1:DP=26	GT:DP:GQ:EC:SG	.:0:0:0:.	1:1:1:1:C	1:2:3:2:G	1:2:3:2:G	1:11:30:11:G	1:3:6:3:G	1:6:18:6:G	1:1:0:1:C
6655_GGCCGGCTCGTCCCTTTGCCCTGCGGGGTCAAGAG_NODE_2_length_295_cov_6.261017	38	.	T	C	38	PASS	NS=7:AN=1:DP=60	GT:DP:GQ:EC:SG	0:2:33:0:T	0/1:15:41:6:Y	0/1:21:70:12:Y	0:5:42:0:T	0/1:4:17:1:T	0:4:39:0:T	1:9:24:9:C	.:0:0:0:.
6798_GGCCGAGGTTGCAGGCTCCCGTCTGCTTTCGCAGA_NODE_2_length_221_cov_4.592760	196	.	G	A	22	PASS	NS=8:AN=1:DP=65	GT:DP:GQ:EC:SG	1:3:6:3:A	1:4:12:4:A	1:14:42:14:A	1:23:56:22:A	1:10:27:10:A	1:2:3:2:A	1:8:21:8:A	1:1:9:1:G
8127_GGCCGGACGGGGAGAGCCGCCCGATCTTCTCGCAG_NODE_2_length_240_cov_16.166666	86	.	A	T	79.43	PASS	NS=7:AN=1:DP=135:AS=ATAACAATAAATGTTAAGGACCATGCACGCGGCCCGGCCAAAAAATAGAG[A/T]TTGGCGAACTTTCTCTATAATGGTCAGAGAGTAAATAATCAACTATTCAA	GT:DP:GQ:EC:SG	0:16:75:0:A	0:19:87:0:A	0/1:29:67:16:W	0:28:111:0:A	0:28:117:0:A	0:10:57:0:A	0:5:42:0:A	.:0:30:0:A
9650_GGCCGCAGCCCCGCTGCATCCCCGCGCGCGGCCAG_NODE_2_length_334_cov_5.014970	288	.	C	T	59	PASS	NS=8:AN=1:DP=110	GT:DP:GQ:EC:SG	0:16:75:0:C	1:3:6:3:T	0:23:99:0:C	0:33:129:0:C	0/1:10:32:7:Y	0/1:8:26:4:Y	0:12:63:0:C	0:5:42:0:C
3012_GGCCGGAGCTGGTTCTGGAGTCACCCCCTCCCCAC_NODE_2_length_270_cov_9.362963	93	.	C	T	118.38	PASS	NS=8:AN=1:DP=272:AS=TGCTGAAACACGCTCCCCTTCCTTCTCCCCCTGGTAATTCCTACGAGGAG[C/T]TCTGGGCTCCACTCAAATTCCTCCTGCCAGAAGACTTTGAGGCCGACCTC	GT:DP:GQ:EC:SG	0:7:48:0:C	0:52:187:0:C	0:89:213:0:C	0:28:114:0:C	0:38:141:0:C	0:7:48:0:C	0:40:147:0:C	0/1:11:49:8:Y
3337_GGCCGGAGCGAACTGGCCCTCGGAATTGCGACCTT_NODE_2_length_226_cov_9.615045	30	.	C	T	20.5	PASS	NS=6:AN=1:DP=46	GT:DP:GQ:EC:SG	1:1:3:1:T	1:12:33:12:T	1:20:57:20:T	1:3:6:3:T	1:5:12:5:T	.:0:0:0:.	1:5:12:5:T	.:0:0:0:.
329_GGCCGGTTTAAAGAGCTACTACAACAGGGGCTCTA_NODE_11_length_141_cov_4.758865	111	.	C	G	36	PASS	NS=6:AN=1:DP=46	GT:DP:GQ:EC:SG	.:0:0:0:.	0/1:20:16:5:S	0:12:66:0:C	0/1:5:26:3:S	0:3:36:0:C	0:2:33:0:C	0:4:39:0:C	.:0:0:0:.
3834_GGCCGAGGCTGGAGAAATGAGGTGAGCTGAGGGCC_NODE_2_length_245_cov_9.089796	21	.	G	T	53.5	PASS	NS=6:AN=1:DP=58	GT:DP:GQ:EC:SG	.:0:0:0:.	0:14:69:0:G	0:20:87:0:G	0:8:51:0:G	0/1:4:24:3:K	0:5:42:0:G	0:7:48:0:G	.:0:0:0:.
1121_GGCCGGCCAGCGCTCACGCGCGGATCAAGGCGCGC_NODE_2_length_146_cov_10.164384	75	.	A	T	79.62	PASS	NS=8:AN=1:DP=208:AS=TCGGTAAGCAGCCAAGCGCTTTAACTACTGCGCCACCAGGGCTCCTTAGC[A/T]ATAAATAGAGTCACAAATACAATAGTGTGCAGGGAGGGGGGACAAATGAG	GT:DP:GQ:EC:SG	1:21:60:21:T	1:8:21:8:T	1:35:102:35:T	0:52:184:0:A	1:29:87:29:T	1:28:84:28:T	1:31:90:31:T	1:4:9:4:T
9198_GGCCGACATCCTTTCTTTCATCCACACAGCGGTCT_NODE_2_length_242_cov_6.239669	136	.	G	C	62.88	PASS	NS=8:AN=1:DP=197	GT:DP:GQ:EC:SG	0/1:16:43:13:S	0/1:43:88:34:S	0/1:33:91:21:S	0/1:37:87:26:S	0/1:19:41:15:S	0/1:17:12:15:S	0/1:21:84:13:S	0/1:11:57:6:S
10714_GGCCGGGTGGCGGGGAGGGGGTGGTGCAAATAAGG_NODE_2_length_162_cov_25.969135	70	.	T	C	119.88	PASS	NS=8:AN=1:DP=292:AS=AGTATGCTTTACATATACACACAGATTTCCCACCAACTTAAGGGCATCCA[T/C]ATCTGAAATGAAAGAGACACGCATTCCTTTAAAGGGGGCAACCGCACTTT	GT:DP:GQ:EC:SG	0/1:33:81:12:Y	1:18:51:18:C	0/1:31:99:15:Y	0:62:214:0:T	0/1:43:103:22:Y	0:39:144:0:T	0:52:184:0:T	0/1:14:83:8:Y
3634_GGCCGCCCTCTCGTGGCCAGTGGGGAGGAGCGCAA_NODE_2_length_280_cov_12.817857	169	.	C	T	84.38	PASS	NS=8:AN=1:DP=235	GT:DP:GQ:EC:SG	0/1:13:42:5:Y	0:18:81:0:C	0/1:38:66:29:Y	0:69:208:0:C	0:47:171:0:C	0/1:14:68:8:Y	0/1:31:5:27:T	0/1:5:34:3:Y
5020_GGCCGCGCTGCGTCCCCTCGCCTCATCGGGCCTCG_NODE_2_length_201_cov_12.059702	50	.	A	G	22.5	PASS	NS=6:AN=1:DP=51	GT:DP:GQ:EC:SG	1:5:12:5:G	1:14:39:14:G	1:9:24:9:G	1:13:36:13:G	1:4:9:4:G	.:0:0:0:.	1:6:15:6:G	.:0:0:0:.
599_GGCCGTTTTCGTGAAGAATCTGCGCGTTGTTCCAG_NODE_2_length_282_cov_17.716312	219	.	A	G	92.25	PASS	NS=8:AN=1:DP=281:AS=CCACACAGGAAGTCAGTAATTTCACAAGAAAGGTTAACATGGTACACGCC[A/G]AAAGTCCACACGGGTGTGGCGCACCTTACCAACACGGCTAAGGCAGGGAG	GT:DP:GQ:EC:SG	0/1:33:52:13:R	0:12:63:0:A	0/1:37:20:10:R	0:69:216:0:A	0:48:171:0:A	0:19:84:0:A	0/1:48:66:31:R	0/1:15:66:10:R
9007_GGCCGCGGCTGATGTCAGGGGCGCAGAATGAGAAC_NODE_2_length_171_cov_8.298245	156	.	C	T	32.14	PASS	NS=7:AN=1:DP=20	GT:DP:GQ:EC:SG	0:2:33:0:C	0:1:30:0:C	0:1:30:0:C	0:6:48:0:C	0:5:42:0:C	0:2:33:0:C	1:3:9:3:T	.:0:0:0:N
11070_GGCCGCCACATCGCAGGAAGCAGACACGCGTGAAA_NODE_2_length_305_cov_7.390164	93	.	A	G	22.29	PASS	NS=7:AN=1:DP=55	GT:DP:GQ:EC:SG	1:7:18:7:G	1:12:33:12:G	1:24:78:24:G	1:5:12:5:G	1:3:6:3:G	1:2:3:2:G	1:2:6:2:G	.:0:0:0:.
10614_GGCCGTCATACAGGAAGCAGATGGTCGGCAGCAGA_NODE_3_length_144_cov_12.208333	20	.	A	C	11.83	PASS	NS=6:AN=1:DP=28	GT:DP:GQ:EC:SG	.:0:0:0:.	1:4:9:4:C	1:10:27:10:C	1:4:9:4:C	1:1:5:1:A	1:3:6:3:C	1:6:15:6:C	.:0:0:0:.
6801_GGCCGTTTGCTTTGGATCCATGGCAACGTGAGGGC_NODE_2_length_196_cov_16.306122	21	.	T	C	42.62	PASS	NS=8:AN=1:DP=63	GT:DP:GQ:EC:SG	0/1:8:40:6:Y	1:6:15:6:C	0:16:75:0:T	0:7:48:0:T	0:5:42:0:T	0:5:42:0:T	0:13:66:0:T	0/1:3:13:1:T
9727_GGCCGAGGAATGGCGGGCTGCCTTTACCGTTAGCC_NODE_2_length_306_cov_25.166666	211	.	G	A	98.88	PASS	NS=8:AN=1:DP=314:AS=ATATGAATGTAACCGTACCAAACTCAGAAGAGGATCACTTCAAATAATCA[G/A]AGAAAGATGGACTGGCACTTACATTTTGGGCAGTGCAAAGACCTTGCCTG	GT:DP:GQ:EC:SG	0/1:33:50:11:R	0:22:93:0:G	0/1:41:70:17:R	0:71:221:0:G	0:48:171:0:G	0/1:23:53:9:R	0/1:57:73:25:R	0/1:19:60:8:R
2456_GGCCGGGTCCACCGCAGGGAACAAGCCTGTAGGGA_NODE_2_length_166_cov_19.692772	139	.	A	G	41.62	PASS	NS=8:AN=1:DP=309	GT:DP:GQ:EC:SG	0/1:19:50:13:R	0/1:13:46:7:R	0/1:38:22:29:R	0/1:89:65:51:R	0/1:48:58:34:R	0/1:37:60:23:R	0/1:48:10:41:R	0/1:17:22:13:R
5911_GGCCGCTTTTTTCTTGTTTTGGTACCCCGGGGGGC_NODE_2_length_164_cov_26.871952	41	.	G	A	46.75	PASS	NS=8:AN=1:DP=90	GT:DP:GQ:EC:SG	1:4:9:4:A	0/1:24:71:11:R	0/1:20:45:7:R	0:12:63:0:G	0:10:57:0:G	0:8:54:0:G	0/1:9:39:5:R	0:3:36:0:G
3950_GGCCGGACCTTCCTCCCGTAGAAGCCGCTCGGCCC_NODE_2_length_227_cov_11.660793	14	.	C	T	8.5	q10	NS=6:AN=1:DP=8	GT:DP:GQ:EC:SG	.:0:0:0:.	1:2:2:2:C	1:1:0:1:C	0:1:30:0:C	1:2:3:2:T	1:1:13:1:C	1:1:3:1:T	.:0:0:0:.
8331_GGCCGGGAGGCGAGCCCACCGAGCTCTATGCAAAC_NODE_2_length_180_cov_13.577778	100	.	A	G	124	PASS	NS=8:AN=1:DP=354:AS=CCACTGACACTCAGCCTGTGAGATCTGCTTGGATTCCCAGAGGGTGGGAC[A/G]CTGCAACCACCTCTCCGCCTCTCTTGCTGCCCAACTGCTTCCTCTGCGCA	GT:DP:GQ:EC:SG	0/1:27:97:14:R	1:47:126:47:G	0:40:147:0:A	0:71:211:0:A	0:67:198:0:A	0/1:20:81:11:R	0/1:67:87:29:R	1:15:45:15:G
4384_GGCCGGCTCTGGGCCCTTGGGCCACACTTCTGTCC_NODE_2_length_165_cov_12.939394	40	.	G	T	79.12	PASS	NS=8:AN=1:DP=155	GT:DP:GQ:EC:SG	0/1:17:30:4:K	0:13:66:0:G	0:25:102:0:G	0:27:108:0:G	0:29:114:0:G	0:11:60:0:G	0:28:111:0:G	0:5:42:0:G
8058_GGCCGTTCCTTTTTTCCTCCATCACCCCTCCCGAC_NODE_2_length_238_cov_10.537815	105	.	C	T	96.38	PASS	NS=8:AN=1:DP=197:AS=GATGTCCACCTGAGTCCTGCCTACAGTCCTCCGCTCTACCAGCTGAGCTA[C/T]CGAAGGGCGCACTCCAGTACCGCTGGGGATATTTCTTTCAAGAAATGCTG	GT:DP:GQ:EC:SG	0:10:57:0:C	0:42:156:0:C	0:50:184:0:C	0:27:111:0:C	0:27:111:0:C	0:3:36:0:C	0/1:37:86:25:Y	0:1:30:0:C
6524_GGCCGGCTTCCCGGGGCTCCTGGCCCATTTGTGAC_NODE_2_length_253_cov_9.272727	179	.	G	A	104.62	PASS	NS=8:AN=1:DP=345:AS=CATGGCAACCCCACAGGTGTCGGAGTCAGAGCTGCTCCACAGGGTTTTCA[G/A]TGGCTGAGTGTTCAGAAGGCCTTTCCTCCAAGGCACCTCTGGGCTTTTGG	GT:DP:GQ:EC:SG	0:36:135:0:G	0:21:90:0:G	0:25:102:0:G	0:65:205:0:G	0/1:71:86:38:R	0/1:59:49:19:R	1:50:119:50:A	1:18:51:18:A
6759_GGCCGGGGCGAACCAGCGCCCGGGGCGTCCGCGGC_NODE_2_length_184_cov_4.081522	161	.	T	G	38.25	PASS	NS=8:AN=1:DP=32	GT:DP:GQ:EC:SG	0:2:33:0:T	0:2:33:0:T	0:4:42:0:T	0:11:60:0:T	0/1:5:30:3:K	0:1:30:0:T	0:6:48:0:T	0:1:30:0:T
2000_GGCCGTGTATTACTGTGCGAAAGACACAGTGAGGG_NODE_5_length_210_cov_20.195238	183	.	T	A	53.38	PASS	NS=8:AN=1:DP=106	GT:DP:GQ:EC:SG	0/1:8:4:2:W	0/1:6:40:4:W	0:7:48:0:T	0:26:105:0:T	0:19:87:0:T	0:11:63:0:T	0:9:54:0:T	0/1:20:26:3:T
355_GGCCGAGGGCGAAGAAATGGTGACGGAACCATCCT_NODE_2_length_255_cov_20.141176	124	.	G	C	105.75	PASS	NS=8:AN=1:DP=380:AS=GAGGTGGAATGAACTGGACAGCAACGGGTTTTGTGGCTTTTTTTGTGGAA[G/C]CAAGATGCAAGAGTTCTCTCCCTACTGCCCTCCAGAAGTGAACGTAGGCA	GT:DP:GQ:EC:SG	0/1:22:29:7:S	1:56:128:56:C	1:63:129:63:C	0:56:196:0:G	1:66:131:66:C	1:20:60:20:C	1:85:140:85:C	1:12:33:12:C
3132_GGCCGGCCGGTTTAAAGAGCTACTACAACAGGGGC_NODE_2_length_211_cov_13.284360	97	.	A	G	19.29	PASS	NS=7:AN=1:DP=34	GT:DP:GQ:EC:SG	1:6:15:6:G	1:3:6:3:G	0:4:39:0:A	0:5:42:0:A	0/1:4:24:3:R	1:3:6:3:G	0/1:9:3:8:R	.:0:0:0:.
404_GGCCGGTTCCGCAGACCCCTCCATTTTACCCAAGG_NODE_2_length_207_cov_6.101449	126	.	G	C	40.62	PASS	NS=8:AN=1:DP=168	GT:DP:GQ:EC:SG	0/1:11:3:10:S	0/1:11:24:9:S	0/1:50:34:11:S	0/1:34:103:15:S	0/1:27:48:21:S	0/1:14:37:6:S	0/1:13:64:6:S	0/1:8:12:7:S
5994_GGCCGGTCGGGAAGCTCTGTTGTGCGCCTCGCCTC_NODE_2_length_232_cov_8.017241	44	.	A	T	33	PASS	NS=8:AN=1:DP=66	GT:DP:GQ:EC:SG	0:5:42:0:A	0/1:22:38:6:W	0:7:48:0:A	0:17:78:0:A	0:6:45:0:A	1:2:3:2:T	0/1:6:3:5:W	1:1:7:1:A
9979_GGCCGCATGTGACTGGTGGCGTAGTGGTTAAGAGT_NODE_2_length_317_cov_15.987382	36	.	G	C	27.86	PASS	NS=7:AN=1:DP=27	GT:DP:GQ:EC:SG	.:0:0:0:.	0:11:60:0:G	0:1:30:0:G	0/1:8:52:5:S	0:2:33:0:G	1:1:1:1:G	1:3:6:3:C	1:1:13:1:G
4843_GGCCGTCACCCTGTGGAGACGTGCCCATGAGCTCC_NODE_2_length_323_cov_20.170279	120	.	G	A	105.25	PASS	NS=8:AN=1:DP=233	GT:DP:GQ:EC:SG	0/1:3:8:1:G	0:33:126:0:G	0:55:193:0:G	0:25:102:0:G	0:54:190:0:G	0/1:11:39:5:R	0:51:181:0:G	1:1:3:1:G
5752_GGCCGCTTAACCCTTCGCTCCCCGACACGCGCCGT_NODE_2_length_206_cov_7.131068	126	.	A	C	59.12	PASS	NS=8:AN=1:DP=324	GT:DP:GQ:EC:SG	0/1:33:59:15:M	0/1:32:70:22:M	0/1:55:70:29:M	0/1:93:61:42:M	0/1:49:72:30:M	0/1:17:63:10:M	0/1:41:69:24:M	0/1:4:9:2:M
10247_GGCCGCTCCTCCCTATCTGGGCGGCACAGCCGCGC_NODE_2_length_245_cov_9.579592	90	.	A	G	56.75	PASS	NS=8:AN=1:DP=121:AS=GGCGGTGGTCCCAGCCGCGTCCGCCTGGACTGCAGTCTCCCCGACCCAAG[A/G]AACCAGCTGTGCGGGCGCAGGCGCAGTGGCTGGTTGCTGCTGGGCGCAAA	GT:DP:GQ:EC:SG	0:13:66:0:A	0/1:28:13:5:A	0:32:123:0:A	0:24:102:0:A	0:12:63:0:A	0:8:51:0:A	1:3:6:3:G	0:1:30:0:A
7287_GGCCGTGGGAGACAGGATGGGAAGGGAAATCAGCG_NODE_1_length_131_cov_56.541985	121	.	A	G	43.57	PASS	NS=7:AN=1:DP=102	GT:DP:GQ:EC:SG	0/1:25:72:12:R	.:0:0:0:.	0:1:30:0:A	0:8:54:0:A	0/1:6:23:3:R	0:3:36:0:A	0/1:3:17:1:A	0/1:56:73:26:R
8730_GGCCGCGAGAGCCAATCCGCTCGCACAGGAGGCCC_NODE_2_length_173_cov_8.502891	170	.	C	T	29.29	PASS	NS=7:AN=1:DP=197	GT:DP:GQ:EC:SG	0/1:68:8:61:T	.:0:0:0:.	1:2:9:2:T	0/1:14:41:9:Y	1:14:39:14:T	1:3:6:3:T	1:9:27:9:T	1:87:75:84:T
7419_GGCCGGGTGTTTGCATAGAACGTTATCCGCTGAAT_NODE_2_length_176_cov_9.522727	71	.	G	C	59.75	PASS	NS=8:AN=1:DP=583	GT:DP:GQ:EC:SG	0:22:65:0:G	0:166:196:0:G	0/1:119:24:23:G	0/1:76:38:18:S	0/1:68:9:11:G	0/1:22:19:4:S	0/1:92:117:8:G	0/1:18:10:4:S
8492_GGCCGTGACCTAGGGTCACGACCTTGCTTGTATGC_NODE_2_length_307_cov_26.413681	26	.	G	A	53	PASS	NS=6:AN=1:DP=147	GT:DP:GQ:EC:SG	.:0:0:0:.	1:71:105:71:A	1:33:96:33:A	1:11:30:11:A	1:4:9:4:A	1:8:21:8:A	1:20:57:20:A	.:0:0:0:.
9641_GGCCGGCTGTTACCCTGCTCTCTAATTTTGCACCA_NODE_2_length_319_cov_5.385580	113	.	A	T	67.43	PASS	NS=7:AN=1:DP=168:AS=TTACTGAGGGCAGCCTTCCAGAGATGCCCCTGGCATGTGCCTCAGTTTTC[A/T]CACCTGTGATAACAATGCTGCCCTGCTTAGCTCCTGGTGGGTGAGACCCA	GT:DP:GQ:EC:SG	1:7:18:7:T	1:55:148:55:T	1:28:84:28:T	1:29:84:29:T	1:18:51:18:T	1:6:15:6:T	1:25:72:25:T	.:0:0:0:.
9581_GGCCGCCCATTCAGGTGAGCAGACGGCCCCTGGGG_NODE_2_length_239_cov_4.853557	143	.	G	C	32.88	PASS	NS=8:AN=1:DP=161	GT:DP:GQ:EC:SG	0:2:33:0:G	0/1:33:56:4:G	0/1:42:35:10:S	0/1:31:34:3:G	0/1:11:11:2:G	0:7:48:0:G	0/1:33:13:5:G	0:2:33:0:G
10032_GGCCGGTTGTTCCTCCTGCTTCTGTGTAGCCTGAT_NODE_2_length_151_cov_15.344371	11	.	C	T	6.29	q10	NS=7:AN=1:DP=26	GT:DP:GQ:EC:SG	1:2:3:2:T	0/1:5:1:2:Y	1:5:12:5:T	0/1:4:4:2:Y	1:2:3:2:T	1:1:7:1:C	0/1:7:14:3:Y	.:0:0:0:.
3671_GGCCGGCGGCAGCCGCTGCTTGGTGGAGGCCGCGG_NODE_2_length_200_cov_7.645000	103	.	A	T,C	30.83	PASS	NS=6:AN=2:DP=63	GT:DP:GQ:EC:SG	2:24:69:24:C	1:7:18:7:T	1:1:0:1:A	.:0:0:0:.	0/2:4:13:3:M	.:0:0:0:.	0:2:33:0:A	2:25:52:24:C
6924_GGCCGGGCAGCACTGCCTGGGCAGAACCAGCCAGT_NODE_2_length_359_cov_17.961002	298	.	A	T	48.38	PASS	NS=8:AN=1:DP=262:AS=ATTCCAGGGGATGGGGGCAGGCAAAAGGCGGGGTTCTGTGTTTCTATTTT[A/T]AAAATGCTTATAAGGCTCATCCTTTGTTGTGCATAAGACTGACAGATGAG	GT:DP:GQ:EC:SG	0/1:25:18:11:W	0/1:18:12:7:W	0/1:22:56:2:A	0/1:57:22:15:A	0/1:31:35:21:W	0:31:132:0:A	0/1:52:7:17:W	0:26:105:0:A
8690_GGCCGATCTGCAATCACGGTCCGGATCTCCACTGC_NODE_2_length_339_cov_19.982302	93	.	A	C	49.14	PASS	NS=7:AN=1:DP=130:AS=CATCAAGTGGATTCCGACTCATAGCGACCCTATAGGACAGAGTAGATCTG[A/C]CTCAAGGGGTTTTAAATGAGCGGCTGGTGGATTCGAACATAATAGGGTCT	GT:DP:GQ:EC:SG	1:4:9:4:C	1:51:122:51:C	1:31:90:31:C	1:5:12:5:C	1:4:12:4:C	1:4:9:4:C	1:31:90:31:C	.:0:0:0:.
6001_GGCCGGAATCGAGCCCGGGGCTGCCTCCCCAGACC_NODE_2_length_277_cov_6.642599	64	.	C	A	52.88	PASS	NS=8:AN=1:DP=150:AS=CTCTAACAGGAGCAACGTGCACAACAGATGTATGTGAGCTATCTAAGGAA[C/A]AGGGCTGTGATGGTATCTGACAGGCAGCACATCACCAGCTCGTCACAGGT	GT:DP:GQ:EC:SG	1:10:27:10:A	1:36:102:36:A	1:26:75:26:A	1:25:72:25:A	1:26:75:26:A	1:6:15:6:A	1:19:54:19:A	1:2:3:2:A
1178_GGCCGGGAGGCTGCACCGCGCGCGGGCAGGCGGCC_NODE_2_length_262_cov_9.759542	258	.	A	C	7	q10	NS=7:AN=1:DP=22	GT:DP:GQ:EC:SG	1:3:6:3:C	.:0:0:0:.	1:6:15:6:C	1:7:18:7:C	1:1:4:1:A	1:2:3:2:C	1:2:3:2:C	1:1:0:1:A
847_GGCCGTGCTCCGGCCTTGCTCTCCGAGTGCATTCG_NODE_2_length_251_cov_8.920319	167	.	A	C	79.62	PASS	NS=8:AN=1:DP=184:AS=GTCCGGTACATAGGGATTATCCTCCGTCATGCCTCCAAACCCTCAAGGGG[A/C]AAGGCCCCCATACCCTTGGACTTTTCCTCCACGTCTCCCCTAAATGTTTC	GT:DP:GQ:EC:SG	0/1:12:47:9:M	0/1:9:9:3:M	0:46:168:0:A	0:29:117:0:A	0/1:21:41:7:M	1:19:54:19:C	0:38:144:0:A	0:10:57:0:A
268_GGCCGGGGAGAAAAGGCCTCTTGCTATACTCTTTT_NODE_2_length_323_cov_12.445821	109	.	A	C	58.38	PASS	NS=8:AN=1:DP=168	GT:DP:GQ:EC:SG	0/1:14:20:2:A	0/1:59:54:12:M	0:19:54:0:A	0:22:69:0:A	0:19:84:0:A	0:12:63:0:A	0:1:30:0:A	0:22:93:0:A
2858_GGCCGACAAAGCGCGCCGCTGGGCCTGGGACAGTG_NODE_2_length_301_cov_6.611296	270	.	G	A	42.88	PASS	NS=8:AN=1:DP=558	GT:DP:GQ:EC:SG	0/1:52:65:16:R	0/1:18:46:7:R	0/1:28:2:5:R	0/1:185:1:52:R	0/1:87:27:22:R	0/1:66:91:30:R	0/1:87:18:21:R	0/1:35:93:17:R
6474_GGCCGAGGCAACTCAAATCACAGTGGATCTGAAGA_NODE_2_length_273_cov_7.849817	254	.	G	C	27.67	PASS	NS=6:AN=1:DP=42	GT:DP:GQ:EC:SG	0/1:9:36:4:S	.:0:0:0:.	0:1:30:0:G	0/1:13:11:3:S	0:10:57:0:G	.:0:0:0:.	0/1:4:17:1:G	0/1:5:15:1:G
6634_GGCCGCTTGGCCTCAGGCCATCGGGGTCGGGCCTC_NODE_4_length_161_cov_12.919254	87	.	A	G	66.38	PASS	NS=8:AN=1:DP=332:AS=GACACAATGGTTAACCACTTAGCTGCTCACTGAGAGGAACCCGCCCAGTG[A/G]TTCTGTGGGAGAAAGACCTGGCGATCTGTTTCCGTAAAGATTACAGCCAA	GT:DP:GQ:EC:SG	0/1:31:85:17:R	0/1:21:50:8:R	0/1:39:64:14:R	0/1:82:77:38:R	0/1:50:54:19:R	0/1:24:49:8:R	0/1:63:74:38:R	0/1:22:78:12:R
387_GGCCGAGAAGCCGCAAATGAGCCCACCATGTGGCG_NODE_2_length_324_cov_13.447531	17	.	T	A	8.17	q10	NS=6:AN=1:DP=15	GT:DP:GQ:EC:SG	.:0:0:0:.	1:4:12:4:A	1:2:3:2:A	0/1:3:18:2:W	1:1:3:1:A	1:1:4:1:T	1:4:9:4:A	.:0:0:0:.
384_GGCCGGGAGCACAAACTGTTGTGGGCACCCTCTTT_NODE_2_length_301_cov_14.561461	94	.	T	C	53.62	PASS	NS=8:AN=1:DP=265	GT:DP:GQ:EC:SG	0/1:5:15:1:T	0/1:63:44:8:T	0/1:57:36:8:T	0:34:96:0:T	0/1:34:95:14:Y	0/1:11:21:3:Y	0/1:47:55:13:Y	0/1:14:67:9:Y
1263_GGCCGTGTACCTCTGTGCCAGTAGCTTAGCCACAG_NODE_2_length_296_cov_17.766891	143	.	G	T	82.62	PASS	NS=8:AN=1:DP=441	GT:DP:GQ:EC:SG	0/1:15:24:2:G	0/1:67:69:31:K	0:71:149:0:G	0/1:83:33:25:K	0/1:59:64:7:G	0/1:37:53:13:K	0:87:198:0:G	0:22:71:0:G
7287_GGCCGTGGGAGACAGGATGGGAAGGGAAATCAGCG_NODE_1_length_131_cov_56.541985	138	.	C	T	31.83	PASS	NS=6:AN=1:DP=42	GT:DP:GQ:EC:SG	0:9:54:0:C	.:0:0:0:.	.:0:0:0:.	0:2:33:0:C	0:1:30:0:C	0/1:2:10:1:C	0:1:30:0:C	0/1:27:34:7:Y
8492_GGCCGTGACCTAGGGTCACGACCTTGCTTGTATGC_NODE_2_length_307_cov_26.413681	54	.	C	T	47.12	PASS	NS=8:AN=1:DP=426	GT:DP:GQ:EC:SG	0:6:45:0:C	0/1:172:81:86:Y	0/1:95:68:42:Y	0/1:39:16:9:Y	0/1:27:26:7:Y	0/1:24:57:10:Y	0/1:60:48:20:Y	0:3:36:0:C
2912_GGCCGACAAAGTGCGCCGCCGGGCCTGGGACGGTG_NODE_2_length_268_cov_5.059701	199	.	C	T,G	56.25	PASS	NS=8:AN=2:DP=247	GT:DP:GQ:EC:SG	0/1/2:12:20:1,2:C	0/1:41:51:13:Y	0:35:108:0:C	0/1/2:42:5:4,8:C	0:36:104:0:C	0/1:11:42:1:C	0/1:64:104:6:C	0/1:6:16:1:C
1468_GGCCGGGCAGAGCTGCGTTCAGCTTCACAGCCAGG_NODE_2_length_189_cov_25.164021	38	.	A	G	47.17	PASS	NS=6:AN=1:DP=113	GT:DP:GQ:EC:SG	.:0:0:0:.	0/1:50:105:22:R	0/1:31:101:14:R	0/1:9:33:3:R	0/1:5:15:4:R	0/1:5:26:3:R	0/1:13:3:2:A	.:0:0:0:.
3112_GGCCGTGCCCTGCTGGGCCCGTTTTCCAGCTAAGA_NODE_2_length_356_cov_22.308989	170	.	T	C	88.62	PASS	NS=8:AN=1:DP=164:AS=CACTAGTGGCTCCCTTAGAGATTCTGGAAACCCTGTGGGGTCACTATGAG[T/C]TGGAATCCACTCCATGGCAGTGGGTTGTTTTTGAGTGATATTAATGATAT	GT:DP:GQ:EC:SG	0:14:75:0:T	0:42:153:0:T	0:13:66:0:T	0:30:120:0:T	0:28:114:0:T	0/1:9:37:7:Y	0:21:96:0:T	0:7:48:0:T
4610_GGCCGTTCTGAAAGGACTAAGGGGACACAGTATAG_NODE_2_length_329_cov_8.747721	167	.	G	T	41.86	PASS	NS=7:AN=1:DP=120:AS=CGGTTTCTATAGCGTGCCCCACTGTTTCTCCTCAGAAGCGCTCACAGTGC[G/T]TTTACCACCTTCTGTTTCTGCTGGACCAGGCCGCACTCGGCTTTGGTTTC	GT:DP:GQ:EC:SG	.:0:0:0:.	0/1:7:33:4:K	0/1:74:54:12:G	0/1:17:32:2:G	0:5:42:0:G	0:2:33:0:G	0:5:42:0:G	0:10:57:0:G
10765_GGCCGCGACCCTCCTCTCCTGTCTCCGGAGGAGGC_NODE_2_length_209_cov_8.937799	30	.	G	T	21.29	PASS	NS=7:AN=1:DP=55	GT:DP:GQ:EC:SG	1:1:11:1:G	1:15:42:15:T	1:14:25:13:T	1:10:27:10:T	1:4:12:4:T	.:0:0:0:.	1:10:27:10:T	1:1:5:1:G
1263_GGCCGTGTACCTCTGTGCCAGTAGCTTAGCCACAG_NODE_2_length_296_cov_17.766891	148	.	C	T	59.12	PASS	NS=8:AN=1:DP=509	GT:DP:GQ:EC:SG	0/1:16:69:8:Y	0/1:73:39:20:Y	0/1:83:29:22:Y	0/1:95:46:15:C	0/1:69:95:38:Y	0/1:45:63:4:C	0/1:101:71:39:Y	0/1:27:61:9:Y
1297_GGCCGGTTCACACCGAGGGAAGCCTGTGTGTCTGG_NODE_2_length_297_cov_6.508418	82	.	T	G	58.5	PASS	NS=8:AN=1:DP=134:AS=AAGGAAAATCCGGCGCTGTCTTCTGGTATTCTGCAGCTCACATACCCTCT[T/G]AGTGTTTCCTATCTCTTGGCTGTGGTTTCCCTTGCCTTTGCCTGGTGGCT	GT:DP:GQ:EC:SG	0:3:36:0:T	0/1:28:50:9:K	1:33:96:33:G	0/1:16:61:7:K	1:25:72:25:G	0/1:11:45:5:K	0:17:78:0:T	0:1:30:0:T
5752_GGCCGCTTAACCCTTCGCTCCCCGACACGCGCCGT_NODE_2_length_206_cov_7.131068	26	.	C	G	39.71	PASS	NS=7:AN=1:DP=67	GT:DP:GQ:EC:SG	0:9:54:0:C	0/1:12:13:2:C	0:28:114:0:C	0/1:8:24:4:S	0:5:42:0:C	0:1:30:0:C	0/1:4:1:2:S	.:0:0:0:.
1580_GGCCGGTGAGGGCTGTGTTTGTATCAGATGGAAAG_NODE_2_length_324_cov_4.067901	59	.	A	C	10.17	PASS	NS=6:AN=1:DP=23	GT:DP:GQ:EC:SG	.:0:0:0:.	1:10:27:10:C	1:4:9:4:C	1:1:6:1:A	1:6:15:6:C	1:1:3:1:A	1:1:1:1:A	.:0:0:0:.
3671_GGCCGGCGGCAGCCGCTGCTTGGTGGAGGCCGCGG_NODE_2_length_200_cov_7.645000	153	.	A	G	34.25	PASS	NS=8:AN=1:DP=192	GT:DP:GQ:EC:SG	0/1:14:6:3:R	0:18:52:0:A	0/1:40:29:5:A	0/1:48:36:12:R	0/1:12:32:4:R	0/1:17:63:10:R	0/1:34:32:4:A	0/1:9:24:1:A
2471_GGCCGAGGACAGAGTCGTCCTGTGTGGTAAGCGAA_NODE_2_length_392_cov_16.397959	307	.	C	T	72.12	PASS	NS=8:AN=1:DP=165:AS=GTTAGTTACGTAGTGTTCTGTGGCAACTGGACGGTTAGCTTGTTGACCAC[C/T]CAGCTTCCCTCTGACTCCTCCCTTTGCTCATTTCCTGTTTAGCTGCTTGG	GT:DP:GQ:EC:SG	0:48:175:0:C	1:1:5:1:C	1:11:33:11:T	0:34:129:0:C	1:11:36:11:T	0:11:60:0:C	1:11:30:11:T	1:38:109:38:T
8009_GGCCGGAGACGCCAAGAGTGAGGTTAGAAAGCAGC_NODE_2_length_291_cov_11.752578	39	.	C	G	17.86	PASS	NS=7:AN=1:DP=57	GT:DP:GQ:EC:SG	1:4:9:4:G	1:11:30:11:G	1:12:33:12:G	0/1:11:2:10:G	1:4:9:4:G	1:5:12:5:G	1:10:30:10:G	.:0:0:0:.
10697_GGCCGAGCTGAAGTTAGCTGTGGTGAGGGGTCACC_NODE_2_length_349_cov_24.971346	272	.	C	G	106.75	PASS	NS=8:AN=1:DP=266	GT:DP:GQ:EC:SG	0:61:204:0:C	0/1:7:17:3:S	0/1:16:11:4:S	0:53:183:0:C	0/1:25:69:12:S	0:30:123:0:C	1:25:72:25:G	0:49:175:0:C
6474_GGCCGAGGCAACTCAAATCACAGTGGATCTGAAGA_NODE_2_length_273_cov_7.849817	246	.	G	A	18.57	PASS	NS=7:AN=1:DP=53	GT:DP:GQ:EC:SG	0/1:10:39:4:R	0:1:30:0:G	1:1:0:1:A	0/1:15:3:3:R	0/1:16:24:2:G	.:0:0:0:.	0/1:4:13:1:G	0/1:6:21:3:R
2912_GGCCGACAAAGTGCGCCGCCGGGCCTGGGACGGTG_NODE_2_length_268_cov_5.059701	164	.	A	G	26.5	PASS	NS=8:AN=1:DP=370	GT:DP:GQ:EC:SG	0/1:19:7:5:A	0/1:97:9:29:A	0/1:42:38:15:R	0/1:85:48:34:R	0/1:35:6:8:R	0/1:17:24:3:A	0/1:72:70:10:A	0/1:3:10:1:A
2408_GGCCGAAGAGGGTCTGAGCCAGGCGGTGCCCTCGC_NODE_1_length_326_cov_46.475460	142	.	G	A	28.75	PASS	NS=8:AN=1:DP=500:AS=AAGATTTCAAAGGGCATCTCGAGAAGACAAAGTAAAGTATTATAATGACA[G/A]GCGCAAAGAGGTGGAGATAGAAAACCAAAAGCATTTCTAAAGCTGAAAGA	GT:DP:GQ:EC:SG	0/1:20:33:7:R	0/1:97:18:29:R	0/1:103:40:39:R	0/1:93:38:33:R	0/1:65:21:18:R	0/1:21:41:2:G	0/1:89:20:27:R	0/1:12:19:2:G
9678_GGCCGAGAAGGTTCCGCGTGGGACTGTAGAGGGAC_NODE_2_length_207_cov_8.661836	58	.	G	T	45.25	PASS	NS=8:AN=1:DP=419	GT:DP:GQ:EC:SG	0/1:28:30:4:G	0/1:81:12:18:K	0/1:105:77:38:K	0/1:70:79:25:K	0/1:45:54:13:K	0/1:25:22:6:K	0/1:58:62:20:K	0/1:7:26:1:G
10003_GGCCGTTTCCCCCGGAGAACTGCCTCGCCGTAGCC_NODE_2_length_182_cov_6.456044	44	.	G	A	34.12	PASS	NS=8:AN=1:DP=250	GT:DP:GQ:EC:SG	0/1:12:66:8:R	0/1:34:5:5:G	0/1:43:44:13:R	0/1:54:38:16:R	0/1:66:18:17:R	0/1:8:17:3:R	0/1:25:65:12:R	0/1:8:20:3:R
4048_GGCCGTAGCTTGGAGAGATGCCCTCCTATCTTGCT_NODE_2_length_233_cov_4.480687	224	.	C	T	15.17	PASS	NS=6:AN=1:DP=33	GT:DP:GQ:EC:SG	0/1:5:5:2:C	1:9:24:9:T	.:0:0:0:N	0:5:42:0:C	0/1:5:6:3:Y	0/1:3:11:2:Y	0/1:6:3:3:Y	.:0:0:0:N
5439_GGCCGACACACCCCAGACACAGTAGGTACTCGGGA_NODE_2_length_174_cov_7.189655	51	.	G	T	73	PASS	NS=8:AN=1:DP=131:AS=GAAGTTTTCCAACAGCTCTAACACCAAGCTCTGAGGGAGGGGCTGAAGAC[G/T]CTTAGAGTTTGCCCGAGGCCCCATAGCTGGTTCAGAAACCTTCAACATCC	GT:DP:GQ:EC:SG	0:4:39:0:G	0:55:193:0:G	0/1:13:40:4:K	0:7:48:0:G	0:19:84:0:G	0:11:60:0:G	0:17:78:0:G	0:5:42:0:G
4962_GGCCGAGTGCCATGGGCAGAAACATTGACACATAC_NODE_3_length_173_cov_4.890173	96	.	G	C	39	PASS	NS=8:AN=1:DP=202	GT:DP:GQ:EC:SG	1:1:1:1:G	0/1:83:43:25:S	0/1:30:8:5:G	0/1:36:71:14:S	0:12:63:0:G	0/1:16:4:3:S	0/1:21:86:12:S	0:3:36:0:G
268_GGCCGGGGAGAAAAGGCCTCTTGCTATACTCTTTT_NODE_2_length_323_cov_12.445821	256	.	C	G	105.25	PASS	NS=8:AN=1:DP=369	GT:DP:GQ:EC:SG	0:114:255:0:C	0/1:33:80:12:S	1:2:3:2:G	0:23:99:0:C	0:15:45:0:C	0:9:54:0:C	0:8:51:0:C	0:165:255:0:C
6491_GGCCGGCCCGGGAACGGCCTGACTCCTTGACGTGG_NODE_2_length_266_cov_25.360903	232	.	T	G	65.5	PASS	NS=8:AN=1:DP=119	GT:DP:GQ:EC:SG	0/1:23:74:10:K	0:1:30:0:T	0:11:60:0:T	0:31:120:0:T	0/1:20:84:11:K	0/1:3:9:1:T	0:21:90:0:T	0/1:9:57:6:K
1168_GGCCGGCTGCCCGGTCCTACTTCTCCCTGCCTCGG_NODE_3_length_164_cov_5.774390	55	.	C	G	97	PASS	NS=8:AN=1:DP=233:AS=CCTGGCTGCGAAGCCGCTTTAATTTTGAGAACGACATTTCCCAGAATCCT[C/G]TCCCTCCCGCGATTCCGGGTTAGAGGCGGCCAATGAAATCCCGCGAGATT	GT:DP:GQ:EC:SG	0:19:84:0:C	0/1:41:100:18:S	0/1:47:105:21:S	0:55:193:0:C	0:20:87:0:C	0:23:96:0:C	1:26:78:26:G	0:2:33:0:C
9138_GGCCGCGGGGCTTTGTAGGGGCTGTAGTCTCGGGT_NODE_2_length_343_cov_11.941691	26	.	A	C	9.33	q10	NS=6:AN=1:DP=19	GT:DP:GQ:EC:SG	.:0:0:0:.	1:8:21:8:C	1:3:6:3:C	0/1:4:22:3:M	1:1:3:1:C	1:1:3:1:A	1:2:1:2:A	.:0:0:0:.
6950_GGCCGAATAGGACCAAATACGGCTGAATCGTGCCG_NODE_1_length_344_cov_73.558136	127	.	T	G	95	PASS	NS=8:AN=1:DP=1890:AS=CCTCGATTTGTATCTATTCATCTATATTCAGCACTACTCGACTCTGACTA[T/G]TCTCCTCTACTGAACTCTACTCCATTCTACTCTTTGTATTCTCTTCTGTA	GT:DP:GQ:EC:SG	0/1:87:26:15:T	0/1:572:124:125:T	0/1:338:158:69:T	0/1:256:121:56:T	0/1:215:70:83:K	0/1:83:26:15:T	0/1:284:233:29:T	0/1:55:2:10:K
4582_GGCCGCCCCTTGGAAACCCTATGGGGCAGTTCTAC_NODE_3_length_173_cov_5.445086	114	.	T	C	24.88	PASS	NS=8:AN=1:DP=45:AS=CAACAATGGATTCAAAGATACCAGTGATCATGAAGATGGCACATGAGTAG[T/C]CAGTGTTTTGTTCTGTTATACATAAGACCACCCTGAATATGGGCCAACTC	GT:DP:GQ:EC:SG	0:2:33:0:T	1:8:21:8:C	1:15:42:15:C	0/1:10:14:3:Y	0:5:42:0:T	0:1:30:0:T	1:1:11:1:T	1:3:6:3:C
5816_GGCCGTGTCCTCAGGATTCACAGAGGTCAGTTGTA_NODE_6_length_143_cov_9.706294	90	.	C	T	41.75	PASS	NS=8:AN=1:DP=140	GT:DP:GQ:EC:SG	0:7:48:0:C	0/1:45:36:13:Y	0:27:86:0:C	0/1:23:50:9:Y	0/1:12:30:5:Y	0/1:10:33:1:C	0/1:10:6:2:C	0:6:45:0:C
1553_GGCCGCCCTCTGCTCGCTCCTGGATGCTGATGCGA_NODE_2_length_234_cov_10.252137	83	.	G	T	65.25	PASS	NS=8:AN=1:DP=267	GT:DP:GQ:EC:SG	0/1:28:15:7:K	0/1:36:119:19:K	0/1:70:91:19:K	0/1:49:134:23:K	0/1:33:18:7:G	0/1:16:23:5:K	0:25:71:0:G	0/1:10:51:7:K
10182_GGCCGAGGAAACCGCGGGGGTGAGTGCCGGACCCG_NODE_2_length_260_cov_8.700000	245	.	G	A	21.43	PASS	NS=7:AN=1:DP=50	GT:DP:GQ:EC:SG	1:8:21:8:A	0/1:4:11:1:G	1:1:1:1:G	0/1:11:18:4:R	0:12:63:0:G	1:3:6:3:A	1:11:30:11:A	.:0:0:0:N
7759_GGCCGTTCTTCCCATGCCCTCTGGGTGGACTCCAA_NODE_2_length_246_cov_5.544715	78	.	T	C	40.12	PASS	NS=8:AN=1:DP=53	GT:DP:GQ:EC:SG	0:3:36:0:T	0:4:39:0:T	0:8:51:0:T	0:19:66:0:T	0:6:45:0:T	0/1:2:8:1:T	0/1:10:46:5:Y	0:1:30:0:T
6957_GGCCGGCCTCTTCCCGATTCTGGAAGGCAAACAGC_NODE_2_length_325_cov_9.781538	86	.	T	A,C	44.86	PASS	NS=7:AN=2:DP=105:AS=ACAGTCTCAGCATCTCTTTTTCTCCACATCAGCTCATTCATGCATTCGTT[T/A,C]ATTTAACAAATACTTATAAACGTGTAGATTTAGTCTTCCATTTATCAGAT	GT:DP:GQ:EC:SG	2:3:6:3:C	0:39:144:0:T	0:32:95:0:T	0/2:8:22:1:T	2:9:24:9:C	1/2:8:8:1,7:C	2:6:15:6:C	.:0:0:0:.
8344_GGCCGCCCAGGGGAAGCCCCTACTTGCGCTGCGAC_NODE_2_length_286_cov_9.902098	218	.	C	T	62.25	PASS	NS=8:AN=1:DP=134:AS=TTTCTCCCACGGAGCGGCTGTTAGTTTCCAGTCGCCGAGCAGTGTAACCA[C/T]TGGGCCACACAAATATTAGCAGAGCAAAGGGTGTGTGAGATGACAGGTTT	GT:DP:GQ:EC:SG	1:2:3:2:T	0/1:5:15:3:Y	1:17:51:17:T	0:60:198:0:C	0:16:78:0:C	0:19:84:0:C	1:8:21:8:T	0:7:48:0:C
3467_GGCCGTGGGCAGCCAGGTGGCGGTGAGGGAAGGGG_NODE_2_length_282_cov_19.312057	177	.	C	T	108.62	PASS	NS=8:AN=1:DP=421:AS=GCATGGGACATACTTAAAAAAAATAATTTGTTGTTTACCTGAAATTCAAA[C/T]TTAGCTGGGTGTTCTGTATTTTCAGTTAAGAAGTCTGGGAAAGGGAGACT	GT:DP:GQ:EC:SG	0:29:114:0:C	0/1:56:41:17:Y	0/1:64:55:23:Y	0:99:228:0:C	0:68:211:0:C	0:36:135:0:C	0/1:64:60:25:Y	0/1:5:25:3:Y
4297_GGCCGCGGCGCCTCTCAAAGCCGAAAGCCAACCTA_NODE_2_length_246_cov_8.963414	156	.	C	T	89.62	PASS	NS=8:AN=1:DP=210	GT:DP:GQ:EC:SG	0:10:57:0:C	1:5:12:5:T	0/1:44:50:13:Y	0:58:202:0:C	0:33:126:0:C	0:15:75:0:C	0:43:159:0:C	0:2:36:0:C
3113_GGCCGATCACGGGCTGCCAGGCTGGGCAGCAGCAG_NODE_2_length_183_cov_10.830601	97	.	A	C	121.75	PASS	NS=8:AN=1:DP=328:AS=TTAGATAAAAAAAATCCAAAACCAAATCCGTTGCCTTCGAGTCGACTGCG[A/C]CTCACAGCGACCCTATAGGACAGAGTAGAGCTGCCGTATAGAGTTTCCCA	GT:DP:GQ:EC:SG	0:27:111:0:A	0:72:208:0:A	0:49:178:0:A	0/1:46:70:16:M	0/1:44:71:17:M	0:18:81:0:A	0:62:198:0:A	0:10:57:0:A
3178_GGCCGCCTGGGTTAGTTACAGGGATTTTGTCTTGC_NODE_2_length_262_cov_6.713740	101	.	G	T	38.75	PASS	NS=8:AN=1:DP=117:AS=GGAGAAGCGGGGGCGGGCTGAGGCAAACGGGAGAGGTTGCCCAGCAACGG[G/T]CGCTGCGCAAACCCGCCCTCGGAGGGCAGCACCGCTGGCAGTCAGGTGGC	GT:DP:GQ:EC:SG	1:14:42:14:T	1:24:67:23:T	1:21:66:21:T	1:28:67:27:T	0/1:9:8:8:T	1:8:24:8:T	1:11:33:11:T	1:2:3:2:T
6639_GGCCGTTTCCCCCGGAGAACTGCCTCGCGGTAGCC_NODE_7_length_150_cov_12.760000	123	.	A	G	8.17	q10	NS=6:AN=1:DP=16	GT:DP:GQ:EC:SG	1:4:9:4:G	1:3:6:3:G	1:5:15:5:G	1:2:3:2:G	1:1:10:1:A	1:1:6:1:A	.:0:0:0:.	.:0:0:0:.
1741_GGCCGTAACCCCAGTGCCAACTGAGATTTCGAGAG_NODE_2_length_313_cov_17.271566	128	.	C	T	117.62	PASS	NS=8:AN=1:DP=399:AS=AAGATAGAGAGAGATCAGAGTTTTATCACTCTTTTTGCCCTTCTCTGGTC[C/T]GCCACTCCTCATCTGGTTGTGTGCCGTGGAGTTGACTCCCACTTACAGCG	GT:DP:GQ:EC:SG	0:17:78:0:C	0/1:57:93:34:Y	0/1:69:87:31:Y	0:72:215:0:C	0/1:74:91:40:Y	0:24:102:0:C	0:76:218:0:C	0:10:57:0:C
5961_GGCCGTGTCATCAAGGCCATGAACAACAACTGGCA_NODE_2_length_286_cov_8.870629	154	.	G	A	64.12	PASS	NS=8:AN=1:DP=222:AS=CCTTCTTGGGGGATTCCTCTCCAGCAATGCTCAGCCGCGTGGGTGCAGGC[G/A]GGGACTGATGCAGCTCCAAGTCCTTTATCCCATCACTGTCTTAACTGGCT	GT:DP:GQ:EC:SG	0:18:81:0:G	0/1:39:49:14:R	0/1:70:60:29:R	0/1:47:71:23:R	0:10:57:0:G	0:9:54:0:G	0:28:111:0:G	0:1:30:0:G
7502_GGCCGGCGCGGCTCTCCCCTGCGCCGCCCGCCGCC_NODE_2_length_327_cov_4.648318	149	.	G	A	50.75	PASS	NS=8:AN=1:DP=107:AS=TTACAAGTTGGGGATCACTGGCCCAGAGCTTGTGGAGGGGGTGGTGCAGG[G/A]AGCTCTGCTAGGGGGAAGAGATGAAGAAAGGGAAAGGTGGAGTTTATTGC	GT:DP:GQ:EC:SG	1:6:15:6:A	0/1:24:51:11:R	0:35:132:0:G	0:18:81:0:G	1:2:3:2:A	0:8:54:0:G	0/1:12:37:6:R	0:2:33:0:G
3461_GGCCGCTGGCCCCAGGTGAGGACGCGGTTCGAGGG_NODE_2_length_329_cov_15.875380	56	.	T	A	23.14	PASS	NS=7:AN=1:DP=61:AS=TGTAAGTTCGTTATTAGGAAATAGGGAAACGCTGTTTTAAAAAGTAAAAA[T/A]AAAACAAGTCACGTTCACAATCCCACCACCCACTGAAATATTCTAAGAAC	GT:DP:GQ:EC:SG	1:2:3:2:A	1:15:42:15:A	1:22:63:22:A	1:3:6:3:A	1:6:15:6:A	1:4:9:4:A	1:9:24:9:A	.:0:0:0:N
6591_GGCCGGGGGAGGGGAGCCCACTCCCTTTCTTGCCT_NODE_2_length_319_cov_18.796238	243	.	C	T	129.88	PASS	NS=8:AN=1:DP=363:AS=CCTTATCATCATCCGAGACACAGAAGCCTCCATGATTGACATGTCCACTT[C/T]CTTAAAACTCCAGGAAAAAGTCTCTGGAGTTTTGTGCAACAATCTCCGCG	GT:DP:GQ:EC:SG	0:28:114:0:C	0:34:129:0:C	0:38:144:0:C	0:86:211:0:C	0/1:54:60:28:Y	0:30:117:0:C	0:83:207:0:C	0:10:57:0:C
5945_GGCCGAGTGCTACGAGCAGCTAGGCCAGCTGCATC_NODE_2_length_247_cov_22.327936	17	.	T	G	44.43	PASS	NS=7:AN=1:DP=97	GT:DP:GQ:EC:SG	0/1:9:39:1:T	0/1:21:90:10:K	0/1:17:24:4:K	0/1:25:51:7:K	0/1:2:5:1:T	0:7:48:0:T	0/1:16:54:6:K	.:0:0:0:.
10003_GGCCGTTTCCCCCGGAGAACTGCCTCGCCGTAGCC_NODE_2_length_182_cov_6.456044	111	.	C	A	40.88	PASS	NS=8:AN=1:DP=275	GT:DP:GQ:EC:SG	0/1:15:25:5:M	0/1:38:33:29:M	0/1:48:90:26:M	0/1:58:69:8:C	0/1:71:14:18:M	0/1:11:32:1:C	0/1:22:61:11:M	0/1:12:3:3:M
6618_GGCCGAAGAAGCAAAATCGGAACAGACCCTAATTT_NODE_2_length_316_cov_7.202532	293	.	G	T	34.25	PASS	NS=8:AN=1:DP=88	GT:DP:GQ:EC:SG	1:2:3:2:T	0/1:5:14:2:K	1:8:21:8:T	0/1:27:77:13:K	0:7:51:0:G	1:15:42:15:T	1:20:57:20:T	1:4:9:4:T
636_GGCCGCTTTCCTTCAGCCGCCTTCTCCGAGAGCCC_NODE_4_length_159_cov_27.364780	24	.	G	A	48.75	PASS	NS=8:AN=1:DP=189	GT:DP:GQ:EC:SG	0/1:29:33:9:R	0/1:26:58:13:R	0/1:14:23:12:R	0/1:31:57:15:R	0/1:43:62:29:R	0/1:15:53:9:R	0/1:29:71:19:R	0:2:33:0:G
1263_GGCCGTGTACCTCTGTGCCAGTAGCTTAGCCACAG_NODE_2_length_296_cov_17.766891	173	.	C	G	85.88	PASS	NS=8:AN=1:DP=573	GT:DP:GQ:EC:SG	0/1:28:8:5:S	0/1:68:77:26:S	0/1:75:92:7:C	0/1:90:37:15:C	0/1:98:87:12:C	0/1:54:60:17:S	0:125:247:0:C	0:35:79:0:C
6066_GGCCGCCCGCTTCTCTCCCTGCGCCACGCCCCCTC_NODE_2_length_284_cov_11.605634	56	.	A	C	15.83	PASS	NS=6:AN=1:DP=41	GT:DP:GQ:EC:SG	1:6:15:6:C	1:18:47:17:C	1:5:12:5:C	0/1:4:3:3:M	0/1:4:9:3:M	.:0:0:0:N	1:4:9:4:C	.:0:0:0:N
5174_GGCCGATGTCGTCTCTGGCAAGGCCGGGTCACACC_NODE_2_length_278_cov_14.402878	154	.	T	C	85.12	PASS	NS=8:AN=1:DP=233:AS=GAAGCTCGGCGAGTGCACCAAGGTTTGCACTGGGAGGCTCAGTGAGTGGC[T/C]TTTTTCAGTTGAATTTTGAGGTTGGTGATTGGAACATCGCCGTTTCCTTT	GT:DP:GQ:EC:SG	0/1:11:42:1:T	0:36:135:0:T	0:28:117:0:T	0:44:171:0:T	0/1:20:37:9:Y	0/1:30:59:17:Y	1:50:81:49:C	1:14:39:14:C
3719_GGCCGGCCACTGGAGGGCCAGCAGGGACCTGCGGC_NODE_2_length_276_cov_19.471014	85	.	C	T	49	PASS	NS=8:AN=1:DP=181:AS=GCCCCAGGCCATGCTGGCTCCCAGCCCCTTGGTGGTTGGTGTCCTGTTTT[C/T]TGTCTTGGAGAGCCTGGGTACGGGCTCCTGCAGTTGGCCCGGGCCAGGCT	GT:DP:GQ:EC:SG	1:9:24:9:T	1:39:81:39:T	1:53:91:53:T	1:21:29:20:T	1:15:45:15:T	1:12:33:12:T	1:31:84:31:T	1:1:5:1:C
2178_GGCCGAGCTGGCCCCAGGCACTCACCGTAAATGGG_NODE_2_length_317_cov_9.949527	237	.	G	A	103	PASS	NS=8:AN=1:DP=236	GT:DP:GQ:EC:SG	0:12:63:0:G	0:19:87:0:G	0:65:191:0:G	0:52:177:0:G	0/1:24:40:7:R	0:18:87:0:G	0:40:156:0:G	0/1:6:23:4:R
5377_GGCCGGGCAACACTGCATGGGATTTCCTCTGCCAG_NODE_2_length_195_cov_9.220512	45	.	T	C	44.12	PASS	NS=8:AN=1:DP=120	GT:DP:GQ:EC:SG	0/1:12:7:3:Y	0/1:10:42:4:Y	0:18:81:0:T	0:23:70:0:T	0:26:105:0:T	0/1:8:23:1:T	0/1:7:22:1:T	0/1:16:3:3:T
8889_GGCCGTGAAGATCTGATTGTCAAACCACAGATGGG_NODE_2_length_267_cov_5.269663	120	.	A	T	12.88	PASS	NS=8:AN=1:DP=39	GT:DP:GQ:EC:SG	1:1:4:1:A	1:15:42:15:T	1:8:21:8:T	1:3:6:3:T	1:3:6:3:T	1:4:15:4:T	1:3:6:3:T	1:2:3:2:T
10003_GGCCGTTTCCCCCGGAGAACTGCCTCGCCGTAGCC_NODE_2_length_182_cov_6.456044	56	.	C	A	36	PASS	NS=8:AN=1:DP=397	GT:DP:GQ:EC:SG	0/1:23:63:8:M	0/1:49:2:7:M	0/1:70:64:25:M	0/1:90:3:20:C	0/1:98:20:27:M	0/1:15:36:4:M	0/1:36:63:14:M	0/1:16:37:5:M
9326_GGCCGCTGCGTTACTGATCTCGGCGTCGTTTGCTT_NODE_2_length_304_cov_19.851974	280	.	C	T	37.5	PASS	NS=8:AN=1:DP=137	GT:DP:GQ:EC:SG	1:17:48:17:T	1:2:3:2:T	1:23:66:23:T	0/1:39:63:16:Y	0/1:10:1:3:Y	0/1:16:32:5:Y	1:15:45:15:T	1:15:42:15:T
7709_GGCCGGGTATTTGCATAGAACGTTATCTGCGGAAT_NODE_2_length_171_cov_6.614035	75	.	T	A,C	29.71	PASS	NS=7:AN=2:DP=40	GT:DP:GQ:EC:SG	.:0:0:0:.	0/2:2:11:1:T	0:12:66:0:T	0/1:9:29:4:W	0/1:5:16:1:T	0:3:36:0:T	0:3:36:0:T	0/1:6:14:1:T
1417_GGCCGCGGGCGGCAAGGAGGCGGGCCCGGATCCTG_NODE_2_length_223_cov_8.937220	166	.	G	C	60.62	PASS	NS=8:AN=1:DP=1295	GT:DP:GQ:EC:SG	0/1:136:76:79:S	1:51:69:47:C	0/1:172:59:114:S	0/1:300:58:124:S	0/1:205:82:121:S	0/1:135:70:85:S	0/1:212:12:159:C	0/1:84:59:35:S
8935_GGCCGCGCGGCTCGTCGCCTTGACGACAGAGACAA_NODE_2_length_191_cov_8.068063	51	.	A	G	35.5	PASS	NS=8:AN=1:DP=112	GT:DP:GQ:EC:SG	0/1:3:11:1:A	0:17:78:0:A	0/1:38:27:10:R	0/1:19:37:2:A	0/1:13:56:7:R	0/1:7:8:2:A	0/1:14:37:6:R	0:1:30:0:A
9687_GGCCGAGGCTAATTTACTCTCTTCTGCAAACACAA_NODE_2_length_318_cov_18.374214	222	.	C	A	122.12	PASS	NS=8:AN=1:DP=326:AS=ACTGGTCTTGTAAACCAGGGGTCGCGAGTTCAAATCTCGCTGGAGCCTAA[C/A]CCCGAGACATTTTCCTCTAGGTTATAAAAAGGACAGTATTCCACTCCATT	GT:DP:GQ:EC:SG	0:16:75:0:C	0:48:171:0:C	0:37:138:0:C	0:98:231:0:C	0:34:132:0:C	0:31:123:0:C	0/1:52:50:31:M	0:10:57:0:C
9863_GGCCGCGCAGCCGCGTGGCAGCACTGCCGAGCTAG_NODE_2_length_195_cov_17.128204	193	.	G	T	22	PASS	NS=6:AN=1:DP=34	GT:DP:GQ:EC:SG	0/1:5:6:4:K	.:0:0:0:N	1:6:15:6:T	0/1:9:31:1:G	0:8:54:0:G	.:0:0:0:N	1:3:6:3:T	0/1:3:20:1:G
1289_GGCCGGGCGGCTAAACCCCCCCTCACTTCCTGGAG_NODE_2_length_202_cov_7.257426	51	.	G	T	47.12	PASS	NS=8:AN=1:DP=92:AS=GCTGAATGCTTAACGGTTTGAGCCCCTAGGGCTCCTTCAGGAATTCCAAG[G/T]GTTGTTAACATCATTTATATTATTGCCTCCGTGAGGATTTCTTGACGTCC	GT:DP:GQ:EC:SG	0:10:57:0:G	1:9:27:9:T	0/1:21:23:6:K	0/1:24:75:13:K	0:8:51:0:G	0:3:36:0:G	0:16:78:0:G	0:1:30:0:G
7648_GGCCGCCTCAGGGAACGCTTTGTCCCAGGTGGAGG_NODE_2_length_176_cov_11.562500	76	.	A	C	92.62	PASS	NS=8:AN=1:DP=186:AS=TACACTCACCCCCAAGAAATTTCCTGGCGCAAGTGTGGGACCTGAGGATC[A/C]ACCCATTTTTATATAATCTTCCTCCAGCCCTGGACTACTCAGTTCCACAA	GT:DP:GQ:EC:SG	0:11:60:0:A	0:10:57:0:A	0/1:24:63:14:M	0:44:162:0:A	0:33:126:0:A	0:18:81:0:A	0:28:111:0:A	0:18:81:0:A
7754_GGCCGTTGAGACTGCAATTTTCTGACTGCCTGGGT_NODE_2_length_289_cov_10.020761	149	.	C	A	35.25	PASS	NS=8:AN=1:DP=96:AS=CTACAAAATGTGTTTAAAAACTGGTGGGTCCAGGAAGTTGTTGTGGCTCC[C/A]AGGTCCCACAAACTCGGATATTGGCTGTTGCTCAATTGCCATGCGCAGAA	GT:DP:GQ:EC:SG	1:8:21:8:A	1:15:45:15:A	1:15:48:15:A	1:26:75:26:A	1:10:30:10:A	1:4:12:4:A	1:13:39:13:A	1:5:12:5:A
3583_GGCCGGCTCCAGCGGCGACTTAGAGGGATTCCCTC_NODE_2_length_296_cov_10.162162	142	.	G	A	125.5	PASS	NS=8:AN=1:DP=328:AS=CTTTTTCTACGTCTTGAACTTCTACACCAAATTTGGTTGCCAATACCCCA[G/A]CCCCACCGCCTGGCGCCCTGTGTGGGAGATGCCATACAGGTGTGTGGCTC	GT:DP:GQ:EC:SG	0:24:105:0:G	0:82:203:0:G	0:69:209:0:G	0:61:198:0:G	0:36:125:0:G	0:22:96:0:G	0/1:28:64:11:R	0/1:6:4:2:R
10019_GGCCGGTGGGGGGGCGCCGTGTGGTGTGTGAGCGT_NODE_2_length_155_cov_3.341935	44	.	G	C	35.62	PASS	NS=8:AN=1:DP=103	GT:DP:GQ:EC:SG	1:7:18:7:C	1:36:105:36:C	1:15:42:15:C	1:7:18:7:C	1:13:36:13:C	1:12:33:12:C	1:10:27:10:C	1:3:6:3:C
10891_GGCCGGGGACCGCCGCTGCGCGAGGGGGAAGAGCT_NODE_2_length_267_cov_13.104869	15	.	G	C	46.5	PASS	NS=6:AN=1:DP=56	GT:DP:GQ:EC:SG	.:0:0:0:.	0:4:39:0:G	0/1:24:48:7:S	0:13:66:0:G	0:1:30:0:G	0:5:42:0:G	0:9:54:0:G	.:0:0:0:.
2778_GGCCGCCTACCCGCGCTCGTCCCCGCCAGAGCCGG_NODE_2_length_245_cov_7.302041	109	.	G	A	79.29	PASS	NS=7:AN=1:DP=132:AS=AGGCAGTGCGGAATTAGAGACCAAGGTTTTGAACTTCCAGAACCTTGGCT[G/A]AATCGCCTTTTTCCTTCTTCGGAGATAAGGGGAACCCTTACTTCTCGTCC	GT:DP:GQ:EC:SG	0:9:54:0:G	0:4:39:0:G	0:15:72:0:G	0:47:168:0:G	0:16:75:0:G	0:10:57:0:G	1:31:90:31:A	.:0:0:0:.
1690_GGCCGCAGCTTCCTCAGGGAGAAGTAGCCAGACAC_NODE_2_length_232_cov_7.926724	163	.	T	C	75.62	PASS	NS=8:AN=1:DP=238	GT:DP:GQ:EC:SG	0/1:10:10:4:Y	0/1:22:3:4:T	0/1:25:65:11:Y	0:56:169:0:T	0:51:126:0:T	0:14:38:0:T	0:45:122:0:T	0:15:72:0:T
4297_GGCCGCGGCGCCTCTCAAAGCCGAAAGCCAACCTA_NODE_2_length_246_cov_8.963414	203	.	A	C	70.75	PASS	NS=8:AN=1:DP=147	GT:DP:GQ:EC:SG	0:13:66:0:A	1:5:15:5:C	0/1:19:13:4:A	0:53:190:0:A	0:24:99:0:A	0:7:48:0:A	0:22:96:0:A	0:4:39:0:A
9416_GGCCGGAGGTAGGGGGGTGTAAGGACAGCGGGGGA_NODE_2_length_245_cov_11.677551	144	.	T	C	70.12	PASS	NS=8:AN=1:DP=155:AS=TTGCAACTTTTCTAGAATATAGACGCCTGAATAACCTTCAATTTTAATTT[T/C]CTTTCCTGAAAACTTCAGTAACTACTTTGGTCTCAGAGGAACAAGCATAG	GT:DP:GQ:EC:SG	0:4:39:0:T	0:19:84:0:T	0:25:102:0:T	0:18:81:0:T	0:29:114:0:T	0/1:19:14:6:Y	0/1:28:61:19:Y	0:13:66:0:T
210_GGCCGCCGCACCCCTCGGCGCCTAGCAGCGCAGAA_NODE_2_length_263_cov_18.969582	256	.	A	G	11.17	PASS	NS=6:AN=1:DP=24	GT:DP:GQ:EC:SG	1:5:12:5:G	1:1:10:1:A	.:0:0:0:.	1:6:15:6:G	.:0:0:0:N	1:5:12:5:G	1:2:3:2:G	1:5:15:5:G
10031_GGCCGTGTACCTCTGTGCCAGCAGCTTAGACACAG_NODE_1_length_159_cov_21.735849	176	.	A	G	16.62	PASS	NS=8:AN=1:DP=16	GT:DP:GQ:EC:SG	1:1:1:1:A	0/1:6:22:3:R	0:2:33:0:A	1:1:1:1:A	1:2:3:2:G	0:2:33:0:A	0:1:30:0:A	1:1:10:1:A
10758_GGCCGATCCAAGAGATATGCGGGGACCCGGCGGAC_NODE_2_length_313_cov_10.482429	79	.	A	C	35.88	PASS	NS=8:AN=1:DP=103:AS=AGACGCTCACGGTCCCCTCTACCAAGGGACTTTGCTCGTTGTTTTCTTGC[A/C]TTTGCTGTACTCAGATTACAATCCTCACCTGGGTTTAGAGTGATGCTCTC	GT:DP:GQ:EC:SG	1:4:9:4:C	1:46:125:46:C	1:18:60:18:C	1:5:15:5:C	1:10:27:10:C	1:5:12:5:C	1:13:36:13:C	1:2:3:2:C
5640_GGCCGCTCAGATCACCCGGCACAAGTGGGAGGCTG_NODE_2_length_297_cov_11.616161	227	.	C	G	52.88	PASS	NS=8:AN=1:DP=115	GT:DP:GQ:EC:SG	0:4:39:0:C	0:5:42:0:C	0:14:37:0:C	0:21:56:0:C	0:32:89:0:C	0/1:6:30:3:S	0:16:49:0:C	0:17:81:0:C
4794_GGCCGGCTGGTCCCGGGCTACCCGCGGAGTCGGGG_NODE_2_length_284_cov_14.661972	62	.	A	T	18.62	PASS	NS=8:AN=1:DP=48:AS=TGTGGGCTCTGGAATACGATGGACCTGGAACCCCATCCTCATCGCTTTGG[A/T]CCTAAGTCAGAATCACGCCGTCTGTAAAATGGGTTTTGACCGGCCAAGAG	GT:DP:GQ:EC:SG	1:1:12:1:A	1:12:33:12:T	1:3:6:3:T	1:4:9:4:T	1:11:30:11:T	1:8:21:8:T	1:8:24:8:T	1:1:14:1:A
5480_GGCCGCTTTCCCAAGCCCTTCCAGCTCAAACTATG_NODE_2_length_286_cov_7.506993	91	.	C	G	25.75	PASS	NS=8:AN=1:DP=62:AS=CAGATCTGCCCTTCGCGAAGGGCCGTTTTCCCCCGGAGAACTGCCTCGCG[C/G]TAGCCCTGTTCTGGAAGTGGAACGAGTATGCAGTGTTAGCGTTCAGCTAT	GT:DP:GQ:EC:SG	0:9:54:0:C	1:21:41:20:G	0/1:4:7:2:S	0:7:48:0:C	0/1:7:25:1:C	0/1:3:16:1:C	0/1:6:1:2:C	0/1:5:14:2:S
2000_GGCCGTGTATTACTGTGCGAAAGACACAGTGAGGG_NODE_5_length_210_cov_20.195238	81	.	C	T,G	78.5	PASS	NS=8:AN=2:DP=152:AS=CATTAAATAGTATCCCAAATTCCAAACAGAGGTCTCATCAAGAAATATTA[C/T,G]GTGAAGCCTGTCCTGGAACAGATGCAGAAAGACAGACAAAACTCCTTCCT	GT:DP:GQ:EC:SG	1/2:3:12:2,1:K	0:6:45:0:C	0/1:20:60:6:Y	0:49:175:0:C	0:25:102:0:C	0:4:39:0:C	0:36:141:0:C	0:9:54:0:C
5334_GGCCGGAAGTGGGTGGGACTAAGACCAAGAGAAGG_NODE_2_length_286_cov_20.793707	13	.	A	G	10.62	PASS	NS=8:AN=1:DP=20	GT:DP:GQ:EC:SG	1:3:6:3:G	1:2:3:2:G	1:4:27:4:G	1:5:12:5:G	1:3:6:3:G	1:1:15:1:A	1:1:14:1:A	1:1:2:1:A
7440_GGCCGGCTGCTCCCAAGTCCCTGGGGGCTCAGCTG_NODE_2_length_316_cov_16.417721	247	.	C	G	29.88	PASS	NS=8:AN=1:DP=243	GT:DP:GQ:EC:SG	0/1:25:22:3:C	0:7:48:0:C	0/1:26:5:4:C	0/1:49:31:12:S	0/1:53:27:12:S	0:16:46:0:C	0/1:41:12:8:S	0/1:26:48:2:C
4084_GGCCGACAGAGGGAACCCGATCCGATGTGGTTCTA_NODE_2_length_314_cov_20.640127	88	.	G	T	47.25	PASS	NS=8:AN=1:DP=130:AS=TACCAACTCTGTACTTAAATATTCATGAAGAGGCGGTGAGGTGTAGAGTG[G/T]CTCCCGGAAATGCTTCTGATTGGCTGGTTTTCTCAAACAAGTGTTAGCTT	GT:DP:GQ:EC:SG	1:6:15:6:T	1:22:63:22:T	1:37:111:37:T	1:23:66:23:T	1:19:60:19:T	1:5:15:5:T	1:15:42:15:T	1:3:6:3:T
4327_GGCCGTTCAGAAGAGCCCTCCATTTTCCTCATGGA_NODE_2_length_222_cov_4.648649	36	.	T	C	44.86	PASS	NS=7:AN=1:DP=69	GT:DP:GQ:EC:SG	0:2:33:0:T	0:12:63:0:T	0:6:45:0:T	0/1:15:28:7:Y	0:15:72:0:T	.:0:0:0:.	0/1:14:31:2:T	0:5:42:0:T
1446_GGCCGCGGAGGCAGCTGGGGGGTGAAAAAGAGCAC_NODE_2_length_214_cov_7.495327	84	.	A	C	39.29	PASS	NS=7:AN=1:DP=112:AS=AGGGGGCCAGTTCGCCTGAGCTCTCAAGACTTGGGGTGGAGGGCTGGAAA[A/C]CTCCCTGGCTTGAGCTCTGCTTCCCCAGGACTTGGGGATTTCAACCCCAT	GT:DP:GQ:EC:SG	1:7:18:7:C	1:39:91:39:C	1:38:91:38:C	1:10:27:10:C	1:6:18:6:C	1:3:6:3:C	1:9:24:9:C	.:0:0:0:.
6116_GGCCGCTCCGGCAGAGGTAAGAAGGCTCACAGCGG_NODE_2_length_283_cov_14.060071	271	.	C	A	32.5	PASS	NS=6:AN=1:DP=38	GT:DP:GQ:EC:SG	0:8:51:0:C	.:0:0:0:.	0:1:30:0:C	0:11:63:0:C	0/1:6:18:3:M	0/1:5:15:2:M	.:0:0:0:.	1:7:18:7:A
2912_GGCCGACAAAGTGCGCCGCCGGGCCTGGGACGGTG_NODE_2_length_268_cov_5.059701	121	.	G	A	45.62	PASS	NS=8:AN=1:DP=298	GT:DP:GQ:EC:SG	0/1:12:39:1:G	0/1:94:123:8:G	0/1:43:9:7:G	0/1:63:33:14:R	0/1:33:29:4:G	0:14:43:0:G	0/1:38:59:3:G	0:1:30:0:G
10928_GGCCGGGAGGAGAAAGCAGGCCTGAGCTCTGGCTG_NODE_2_length_337_cov_14.590505	62	.	G	T	36.5	PASS	NS=6:AN=1:DP=88:AS=GTATTTGGTATAAACACAGGCACACCGAGCAGACCTCAGAGAGAGGCATT[G/T]AGGGTATTCTGTATACTAAGGTGCCCTACTGGCGCAGTGCTTAATCGGTC	GT:DP:GQ:EC:SG	.:0:0:0:.	1:30:87:30:T	1:23:66:23:T	0/1:12:6:11:T	1:14:39:14:T	1:6:15:6:T	1:3:6:3:T	.:0:0:0:.
268_GGCCGGGGAGAAAAGGCCTCTTGCTATACTCTTTT_NODE_2_length_323_cov_12.445821	116	.	T	G	50.62	PASS	NS=8:AN=1:DP=189	GT:DP:GQ:EC:SG	0/1:17:80:8:K	0/1:66:20:55:K	0/1:17:34:5:K	0/1:27:95:10:K	0/1:24:83:9:K	0/1:13:21:2:T	1:1:5:1:T	0/1:24:67:16:K
10978_GGCCGATAGCGACAGTGGTGGGCCCCATCACAGAT_NODE_2_length_248_cov_4.504032	63	.	T	C	82.12	PASS	NS=8:AN=1:DP=173:AS=TGCCTTTCACACCCGGGCCACCACCGGTGAACTTGCATTACCCCAGGCCC[T/C]GCTGGAGGGCCACCTCTTCTGGGAAGCCCTCCCAGACTGCTCCAGGCCCA	GT:DP:GQ:EC:SG	0:22:93:0:T	0:48:171:0:T	0:38:141:0:T	0:30:120:0:T	0:12:63:0:T	0/1:7:20:3:Y	1:13:36:13:C	0/1:3:13:2:Y
5231_GGCCGGGGGGGGCGGTGTCAATATGCCCCGGAACC_NODE_2_length_282_cov_7.365248	136	.	T	G	58	PASS	NS=7:AN=1:DP=109:AS=TTTAAGGAATTGCAAAACATATAATTTCTGACCTATTGTGTATGTGCTTT[T/G]AATATATTTTCGTCCACCCCTTGATGGAGGTAAAAGTTTGAATTTATGGG	GT:DP:GQ:EC:SG	1:2:3:2:G	0:20:87:0:T	0/1:29:34:9:K	0:15:72:0:T	0:12:63:0:T	0:7:48:0:T	0:24:99:0:T	.:0:0:0:.
8064_GGCCGTCATGGCGCTGCAGGAGGCGTGCGAGGCCT_NODE_5_length_181_cov_18.458563	157	.	A	G	63.75	PASS	NS=8:AN=1:DP=254:AS=CGAGTAACTTGTTTTCCATAGCAACAAATTTCTAGAGAGGTAAATTCAAA[A/G]ACTGCAACCTAGGCTTCCCATTTCGACTCTTCAAAATCGACTCCACGGTA	GT:DP:GQ:EC:SG	1:19:54:19:G	1:33:96:33:G	1:39:100:39:G	0/1:52:61:26:R	0/1:38:67:25:R	0/1:17:5:4:R	1:47:103:47:G	1:9:24:9:G
8977_GGCCGAGAAGGTCCCGCGTGGGACTGTAGAGGGAC_NODE_1_length_227_cov_23.440529	72	.	A	G	71.12	PASS	NS=8:AN=1:DP=646	GT:DP:GQ:EC:SG	0/1:38:42:11:R	0/1:159:127:25:A	0/1:130:104:19:A	0/1:92:41:16:A	0/1:78:86:10:A	0/1:51:50:6:A	0/1:87:85:10:A	0/1:11:34:1:A
9157_GGCCGGCGCTGTGTCCTCCTGGCAGGACCTCAAGA_NODE_2_length_229_cov_5.751091	15	.	T	G	36.38	PASS	NS=8:AN=1:DP=103	GT:DP:GQ:EC:SG	1:7:18:7:G	1:14:42:14:G	1:32:96:32:G	1:22:63:22:G	1:9:24:9:G	1:6:15:6:G	1:12:33:12:G	1:1:0:1:G
1939_GGCCGCGCAGCTGCCCGCGTCCTGCGTCCTGCCTC_NODE_2_length_330_cov_14.806061	57	.	G	C	15.12	PASS	NS=8:AN=1:DP=48:AS=GAAAAGACTCTAAGCTCATAATACATAGTCTTCAAAAAATGGGAAATCCT[G/C]CAAACTTTGACATTATCTTCAACGTCTGTTGCTTTGAAACCACAATGAGT	GT:DP:GQ:EC:SG	1:3:6:3:C	1:11:30:11:C	1:17:48:17:C	1:2:3:2:C	1:3:6:3:C	1:2:3:2:C	1:9:24:9:C	1:1:1:1:G
2787_GGCCGCTCCCTCCCAGGAGCTGTTGAGAAGTTTGG_NODE_2_length_344_cov_16.334303	118	.	T	C	61.25	PASS	NS=8:AN=1:DP=136:AS=TGGGAAATTAAGCTACGAACTGCAGAAAACGCCAACAACAAAAAAATATT[T/C]AGCCGTTCCTACTATTTTCCTAATGGAGACAGGACCCCACCCGTTCACCC	GT:DP:GQ:EC:SG	0:13:66:0:T	0/1:30:71:15:Y	0/1:37:79:18:Y	0:21:90:0:T	0:16:75:0:T	0:5:42:0:T	0:13:66:0:T	1:1:1:1:T
1963_GGCCGCGGCCTTGCAGGGGTCGTGATGAATTTAAT_NODE_2_length_262_cov_19.041985	4	.	T	A	3.17	q10	NS=6:AN=1:DP=9	GT:DP:GQ:EC:SG	1:2:3:2:A	1:1:5:1:T	1:1:4:1:T	1:1:1:1:T	1:2:3:2:A	.:0:0:0:.	1:2:3:2:A	.:0:0:0:.
3132_GGCCGGCCGGTTTAAAGAGCTACTACAACAGGGGC_NODE_2_length_211_cov_13.284360	65	.	A	G	15.29	PASS	NS=7:AN=1:DP=28	GT:DP:GQ:EC:SG	1:6:15:6:G	1:3:6:3:G	0:2:33:0:A	0:5:42:0:A	0/1:2:2:1:A	1:3:6:3:G	0/1:7:3:6:R	.:0:0:0:.
3561_GGCCGGAGGGGTGGGTCGGGAGCTCGTGTTTTGGG_NODE_2_length_341_cov_6.865103	270	.	T	G	106.62	PASS	NS=8:AN=1:DP=241:AS=TAGCCTACCTCCCAGGCGCCTTGTGAGGACCAAGTGGGAGGACATGGTCA[T/G]CGGGCAGAACACACACGACAGGAGGCTCTAAGTCTCGTTGCTGGAAGGAA	GT:DP:GQ:EC:SG	0:13:66:0:T	0:9:54:0:T	0:30:117:0:T	0:59:198:0:T	0:53:187:0:T	0:15:53:0:T	0/1:47:103:28:K	0/1:15:75:9:K
5800_GGCCGAACAAGTCAGCCCCGCCGGGGCGCCCTACG_NODE_2_length_221_cov_8.199095	177	.	C	T	38.5	PASS	NS=8:AN=1:DP=150:AS=CCCGAAGTGGCATCTCCACAAAAAGTCGAGACGCTCTACGAAAGCCCTAG[C/T]CCACCACGAAATTCTGCGCACAGGGACCGTCGCAGCCTCGGTGCAGTGCG	GT:DP:GQ:EC:SG	0/1:18:9:4:Y	0/1:8:13:3:Y	0/1:21:69:11:Y	0/1:51:48:19:Y	1:13:45:13:T	0:13:66:0:C	1:18:57:18:T	0/1:8:1:3:Y
8492_GGCCGTGACCTAGGGTCACGACCTTGCTTGTATGC_NODE_2_length_307_cov_26.413681	41	.	T	G	48.57	PASS	NS=7:AN=1:DP=337	GT:DP:GQ:EC:SG	1:1:4:1:T	0/1:155:121:26:T	0/1:69:45:10:T	0/1:27:49:9:K	0/1:20:9:5:K	0/1:20:72:10:K	0/1:45:40:13:K	.:0:0:0:.
8225_GGCCGCGAGCCGGACCCTGATTCCGACTGGGAGCC_NODE_2_length_193_cov_8.549223	101	.	C	T	46.88	PASS	NS=8:AN=1:DP=237:AS=AGGGCGCTGAGGGAGAGAACCAATAGCAGAGGCCATGCGTGGAAGCAACA[C/T]AGGGGGTTGGAGAGCCTCAGGCTAAATCACGAAGCGGCCAGCCCTTTTCT	GT:DP:GQ:EC:SG	0/1:12:2:3:Y	0/1:61:82:22:Y	0/1:51:91:22:Y	0/1:26:51:8:Y	0/1:27:44:9:Y	0/1:6:1:2:Y	0/1:53:74:21:Y	0:1:30:0:C
2858_GGCCGACAAAGCGCGCCGCTGGGCCTGGGACAGTG_NODE_2_length_301_cov_6.611296	217	.	C	T,G	38.88	PASS	NS=8:AN=2:DP=571	GT:DP:GQ:EC:SG	0/1/2:40:37:4,11:S	0/2:49:12:9:C	0/2:46:59:5:C	0/1/2:163:11:16,43:C	0/2:87:16:24:S	0/1/2:57:32:8,15:S	0/2:106:107:14:C	0/1:23:37:2:C
4415_GGCCGGGCGCGCATCGAGAAGATGAGCCCGGAGGT_NODE_2_length_322_cov_10.111801	192	.	T	C	122.12	PASS	NS=8:AN=1:DP=346:AS=ATCTGCAGAAAGTTCTTACTGCAACCAGTCTTACGTGGAGAGAGGCCAAC[T/C]AACAGAGGAAGGGGTGAAAAAAAACTGGATACGTGTCCACAGCAGTACCA	GT:DP:GQ:EC:SG	0/1:22:86:12:Y	1:45:119:45:C	1:34:99:34:C	0:92:222:0:T	0:55:199:0:T	0/1:26:78:12:Y	1:63:128:63:C	0/1:9:46:5:Y
8300_GGCCGGCATCTTTTGTTTATAATGCCTTGACATCT_NODE_2_length_293_cov_5.569966	110	.	A	G	11.83	PASS	NS=6:AN=1:DP=29:AS=GACAGAACCTCGATAGCACTTTGGTTCCATTTGCTGAGATGGGGAAGACT[A/G]GGAGAAGAAAATTGAGAGAAGGTCAGAGCGACCAAAGTGTCAGAGTGTAG	GT:DP:GQ:EC:SG	1:1:1:1:A	.:0:0:0:.	1:12:33:12:G	1:8:21:8:G	.:0:0:0:.	1:1:1:1:A	1:5:12:5:G	1:2:3:2:G
2513_GGCCGCCGCCTCTCCGCACCCTGCCGCGCACAAAG_NODE_2_length_243_cov_7.991769	38	.	T	C	37.88	PASS	NS=8:AN=1:DP=188	GT:DP:GQ:EC:SG	0/1:9:21:4:Y	0/1:61:29:17:Y	0/1:43:48:14:Y	0/1:15:48:7:Y	0/1:19:73:12:Y	0/1:10:14:3:Y	0/1:25:55:20:Y	1:6:15:6:C
8141_GGCCGAGCGATTAGGTCACTCTGCACAGCTGCAAA_NODE_2_length_307_cov_10.045603	138	.	T	G	75.38	PASS	NS=8:AN=1:DP=296:AS=CAGCTCCCAGAGGATGCTGCTGGTCCAGGGACTACACTTTAGTTCCAAAG[T/G]TTAGACCAGTGCTTTCAACCTTGGCTGTACATTGGAGTCACCGGGAGCTT	GT:DP:GQ:EC:SG	0/1:26:63:16:K	1:44:96:44:G	0/1:71:56:46:K	0:41:124:0:T	0:28:114:0:T	0/1:32:34:11:K	0/1:40:64:27:K	0/1:14:52:8:K
3468_GGCCGGAGGGAATCGCTGGCCCAGCCCACTGCATA_NODE_2_length_295_cov_21.871187	207	.	T	C	96.88	PASS	NS=8:AN=1:DP=293:AS=ATTCCTCTTAGGAACCCTAGGAAATAGGGACTTTATTTTTCTCCATTTTA[T/C]GAATAAGAAAACTAAGGTTGAAAGATCGAGCAATCCACCCCAGTCATCCA	GT:DP:GQ:EC:SG	0/1:36:78:12:Y	0/1:8:9:2:Y	0/1:41:68:12:Y	0:67:221:0:T	0/1:52:104:24:Y	0/1:18:75:7:Y	0:46:165:0:T	0/1:25:55:7:Y
3052_GGCCGATCGGGCGGGCGCCTCCGTCAGCGCCTCGG_NODE_2_length_339_cov_3.247788	185	.	A	C	15.17	PASS	NS=6:AN=1:DP=27:AS=TCCGCTTCTAAGGCAGCTCGGCTAACACTTCCAGGCTCCCTACCCCCGGC[A/C]CCACCAGCTGGGCCAGACGGGCGCCTGGGACCAGCTAAAGGGCATCCCGC	GT:DP:GQ:EC:SG	1:1:14:1:A	.:0:0:0:N	.:0:0:0:.	1:6:15:6:C	1:6:15:6:C	1:4:12:4:C	1:9:24:9:C	1:1:11:1:A
10645_GGCCGCCTGCCCCAACTGGGAGGACTACCGGTCCC_NODE_2_length_251_cov_21.505976	54	.	C	A	35.38	PASS	NS=8:AN=1:DP=56:AS=GCCGACAAAGGACGGTAAACCACTCAGGTACTAGCAACAGCTGGTTACCA[C/A]CGCTAGGCCTGAAAGAACAAGGAGAAAGAGCTGTCACCACCCAATAGTCA	GT:DP:GQ:EC:SG	1:1:10:1:C	0/1:8:23:5:M	0/1:8:0:3:M	0:7:43:0:C	0:5:42:0:C	0:2:33:0:C	0:21:93:0:C	0:4:39:0:C
7440_GGCCGGCTGCTCCCAAGTCCCTGGGGGCTCAGCTG_NODE_2_length_316_cov_16.417721	260	.	C	T,G	60.5	PASS	NS=8:AN=2:DP=240	GT:DP:GQ:EC:SG	0/1:25:86:14:Y	0/1/2:7:6:2,2:Y	0/1:26:77:12:Y	0/1:47:76:18:Y	0/1:51:60:17:Y	0/1/2:15:26:4,2:Y	0/1:42:87:23:Y	0/1/2:27:66:11,3:Y
5616_GGCCGTTAAGAGGTATGGGCTTCCAACAGTATTGC_NODE_2_length_283_cov_32.586571	81	.	G	A	77.25	PASS	NS=8:AN=1:DP=196	GT:DP:GQ:EC:SG	0/1:18:80:10:R	0/1:49:78:20:R	0/1:28:22:6:R	0:36:135:0:G	0:23:96:0:G	0:6:45:0:G	0:30:117:0:G	0:6:45:0:G
5222_GGCCGAGCATGACCATAGGAAATGAGGTACTAGAA_NODE_2_length_320_cov_14.256250	239	.	A	G	76.12	PASS	NS=8:AN=1:DP=143:AS=TAATCTAAGCACTAATAAATACCTTTATTTTAATTTTACTTTAATTTCCA[A/G]AAATGTTAGACAGTGTTATTTACGGAAATCCTAGAGATTTGGTTAGTTTT	GT:DP:GQ:EC:SG	0:4:39:0:A	0/1:21:54:10:R	0:18:81:0:A	0:33:126:0:A	0:22:93:0:A	0:12:63:0:A	0:25:102:0:A	0:8:51:0:A
6569_GGCCGCCATGCGTCTGCGCCGGACTTTCCACGCTC_NODE_2_length_262_cov_9.274809	145	.	T	C	67.88	PASS	NS=8:AN=1:DP=225	GT:DP:GQ:EC:SG	0/1:25:47:8:Y	0:19:87:0:T	0/1:17:37:2:T	0:45:112:0:T	0/1:39:71:4:T	0/1:24:60:11:Y	0:48:124:0:T	0/1:8:5:2:Y
9165_GGCCGCGTGTTTTCATTCTGAGGCTGCAGGACGAA_NODE_2_length_266_cov_7.785714	32	.	G	A	16.43	PASS	NS=7:AN=1:DP=15	GT:DP:GQ:EC:SG	1:1:1:1:G	0:5:42:0:G	1:1:0:1:A	0:2:33:0:G	0:1:30:0:G	.:0:0:0:.	1:3:6:3:A	1:2:3:2:A
10697_GGCCGAGCTGAAGTTAGCTGTGGTGAGGGGTCACC_NODE_2_length_349_cov_24.971346	296	.	T	C	66.12	PASS	NS=8:AN=1:DP=142	GT:DP:GQ:EC:SG	0:48:171:0:T	1:1:10:1:T	0/1:4:6:2:Y	0:25:102:0:T	0/1:11:27:5:Y	0:9:54:0:T	1:6:15:6:C	0:38:144:0:T
3100_GGCCGGCCTGTGACATCTCAGGGGCTGAGAAACCC_NODE_2_length_243_cov_8.378601	66	.	A	G	23.88	PASS	NS=8:AN=1:DP=73:AS=GAGGGGCAGGGACCATCCGACCCACCTAACTCCAGTCGCAGGCACTCCTT[A/G]AGGGACTTGGTGGGGGGCAGACAGGAATGGAACCCCGCTCGCTCCCCTCT	GT:DP:GQ:EC:SG	1:5:12:5:G	1:21:60:21:G	1:12:42:12:G	0/1:9:5:8:R	1:10:27:10:G	1:2:3:2:G	1:13:36:13:G	1:1:6:1:A
6492_GGCCGGGGGATGGGACCCAGCACAAACCTCCTTCC_NODE_2_length_315_cov_21.825397	64	.	T	C	63.14	PASS	NS=7:AN=1:DP=109:AS=GCCGTGGAGCTGATTCCGACTTGTGGCGATCCCATGTGTGCGCGGTAGAA[T/C]TGCACTGCGTAGAATTTTCAAGGCGGTGACTTTTTGGAAACAGATGGCCA	GT:DP:GQ:EC:SG	0:6:45:0:T	0:28:111:0:T	0:30:117:0:T	0/1:8:22:3:Y	0/1:17:33:5:Y	0:7:48:0:T	0:13:66:0:T	.:0:0:0:.
3298_GGCCGGTGGGTTGAACCGCCAACCTTTTCGATTAG_NODE_2_length_170_cov_15.270588	76	.	C	T	64.62	PASS	NS=8:AN=1:DP=143:AS=TCTACCGTTATGCAAGGATACAATCTATAACCAACTCTTCCTCACAAATA[C/T]AAACGACTATAATTAAACCGCTAAAAGACTGCTCATAAGCTCTATTATCC	GT:DP:GQ:EC:SG	0:6:45:0:C	0/1:47:109:23:Y	0/1:26:98:12:Y	0/1:19:52:6:Y	0:22:93:0:C	0:8:51:0:C	1:10:27:10:T	0:5:42:0:C
3409_GGCCGGTTCCGATGGCCCGGCGACGTCCCGGCCCG_NODE_2_length_301_cov_10.837210	256	.	T	C	75.57	PASS	NS=7:AN=1:DP=139:AS=GTCCCCTTTCTCTTCCTCACCAGGACCTTTTAGTTGTCCTTGGATAAGAA[T/C]AGGGCATTCTATGCTTAGGTCTCTCCTCAGTAAAAATCTGTAAATACCGG	GT:DP:GQ:EC:SG	0:1:30:0:T	.:0:0:0:.	0:1:30:0:T	0:44:159:0:T	0/1:25:90:15:Y	0:18:87:0:T	0/1:37:79:17:Y	0/1:13:54:6:Y
7536_GGCCGGCAGTTTTTCCTGTCCTATCAGCATTTTTA_NODE_2_length_262_cov_10.713740	27	.	C	G	13.71	PASS	NS=7:AN=1:DP=37	GT:DP:GQ:EC:SG	1:4:9:4:G	1:7:18:7:G	1:7:18:7:G	1:4:9:4:G	1:7:18:7:G	.:0:0:0:.	1:7:18:7:G	1:1:6:1:C
1187_GGCCGCCAGCGGGTGGCGCTCTTGCCGCACGAAAG_NODE_2_length_304_cov_12.092105	116	.	T	C	73	PASS	NS=8:AN=1:DP=167:AS=AAGCTGTTACGAACATTCACAGCAAACGGTTTGCAGACCAGTTGCGTGTG[T/C]GGGGCGCCTGCCCATTTCCCGGTTTTGATAACGTACTGACGTCATATAAG	GT:DP:GQ:EC:SG	0/1:13:2:3:Y	0:37:138:0:T	0:42:156:0:T	0:33:132:0:T	0/1:14:55:8:Y	0/1:9:20:3:Y	0:15:72:0:T	0/1:4:9:1:T
7892_GGCCGTGGCCCAAGTCCTTTACTGTCCATTGGGGA_NODE_2_length_214_cov_13.271028	162	.	T	C	44.25	PASS	NS=8:AN=1:DP=143	GT:DP:GQ:EC:SG	0/1:4:21:1:T	1:6:15:6:C	0:10:57:0:T	0/1:48:51:5:T	0/1:12:32:1:T	0:7:48:0:T	0:37:105:0:T	0/1:19:25:2:T
2737_GGCCGCCCGTCTCTCCGCGGGGCCTGTCGCCGGGC_NODE_2_length_198_cov_11.333333	46	.	G	T	58.62	PASS	NS=8:AN=1:DP=120	GT:DP:GQ:EC:SG	1:11:30:11:T	0/1:15:22:5:K	0:25:102:0:G	0:20:87:0:G	0/1:16:48:6:K	0:3:36:0:G	0:25:102:0:G	0:5:42:0:G
1905_GGCCGCTTGGTAGGAGAACTGTCGATCGGGCCCGG_NODE_2_length_325_cov_12.655385	141	.	A	G	46.75	PASS	NS=8:AN=1:DP=200:AS=GGAAAACAAGTGATACTGATCTAAGCCTGTCAAATAAGAGGAAGGATGGC[A/G]CCAGCTACCCCCTGAGCTGATGGGATAATGGCAGGAAAAGATCAACATGT	GT:DP:GQ:EC:SG	0/1:16:26:4:R	0/1:53:10:8:A	0/1:29:41:3:A	0:41:96:0:A	0/1:15:14:2:A	0:10:57:0:A	0:31:88:0:A	0:5:42:0:A
6097_GGCCGTTTAGCGATGAAGTCGTATCTGGGGACCCT_NODE_2_length_330_cov_21.087879	77	.	C	T	57.12	PASS	NS=8:AN=1:DP=145	GT:DP:GQ:EC:SG	1:2:3:2:T	0/1:45:65:31:Y	0:32:129:0:C	0:19:84:0:C	0/1:15:49:11:Y	1:9:24:9:T	0:21:93:0:C	0/1:2:10:1:C
8282_GGCCGGACTGAGAGCCCCTCTTGCGCGGTCCGGAG_NODE_2_length_291_cov_7.567010	25	.	A	G	27.67	PASS	NS=6:AN=1:DP=37	GT:DP:GQ:EC:SG	.:0:0:0:.	0/1:3:19:2:R	1:20:57:20:G	0:7:48:0:A	0:1:30:0:A	1:2:3:2:G	1:4:9:4:G	.:0:0:0:.
2476_GGCCGGGGCTGCGGCTCTGGGAACTCCACCCCACC_NODE_2_length_246_cov_19.703253	150	.	A	G	106.75	PASS	NS=8:AN=1:DP=277	GT:DP:GQ:EC:SG	1:23:66:23:G	0:32:126:0:A	1:41:104:41:G	0:64:213:0:A	1:36:104:36:G	0/1:20:48:8:R	0:51:181:0:A	0/1:10:12:3:R
10721_GGCCGGGGGTTTGGGGAAGATGGTCGCTTTTCCGG_NODE_2_length_209_cov_12.559809	116	.	C	T	104.88	PASS	NS=8:AN=1:DP=467:AS=AGTTAGGGTATGAAAAAAAATAAGCCGCCCACAAAACCGCAGCAGTCATC[C/T]GCTGATATTGACAACTGGATAACGCCACCAAGTGCCCCAAAAACTCGCGT	GT:DP:GQ:EC:SG	1:27:78:27:T	1:25:72:25:T	1:77:137:77:T	0:92:220:0:C	0/1:80:82:36:Y	0/1:49:90:25:Y	0/1:101:84:46:Y	0/1:16:76:9:Y
8977_GGCCGAGAAGGTCCCGCGTGGGACTGTAGAGGGAC_NODE_1_length_227_cov_23.440529	26	.	A	G	66	PASS	NS=8:AN=1:DP=191	GT:DP:GQ:EC:SG	0/1:17:9:4:R	0:51:157:0:A	0:42:139:0:A	0/1:25:49:2:A	0/1:15:47:6:R	0:17:78:0:A	0/1:21:13:5:R	0:3:36:0:A
7046_GGCCGCGGGCGCACCCGCAGCTCTCGCGACACCTC_NODE_2_length_242_cov_18.760330	75	.	C	G	63.75	PASS	NS=8:AN=1:DP=413	GT:DP:GQ:EC:SG	0/1:31:90:15:S	0/1:67:92:38:S	0/1:105:69:41:S	0/1:73:38:20:S	0/1:47:84:21:S	0/1:20:81:11:S	0/1:64:46:19:S	0/1:6:10:2:S
10471_GGCCGGCCCCGCCTCCAAATACCGTGTCCTACCCC_NODE_2_length_304_cov_10.555921	32	.	A	G	36.86	PASS	NS=7:AN=1:DP=55	GT:DP:GQ:EC:SG	0:5:42:0:A	0/1:17:72:10:R	1:18:57:18:G	0:6:45:0:A	0/1:4:20:3:R	0/1:3:15:2:R	0/1:2:7:1:A	.:0:0:0:.
7440_GGCCGGCTGCTCCCAAGTCCCTGGGGGCTCAGCTG_NODE_2_length_316_cov_16.417721	73	.	A	G	72	PASS	NS=8:AN=1:DP=790	GT:DP:GQ:EC:SG	0/1:19:68:10:R	0/1:253:104:140:R	0/1:168:87:88:R	0/1:103:70:46:R	0/1:112:57:46:R	0/1:28:78:16:R	0/1:99:78:57:R	0/1:8:34:4:R
798_GGCCGGCTGCCTCTCCTCGTCTTCCTCCTCCGACC_NODE_2_length_200_cov_9.160000	169	.	C	T	23.25	PASS	NS=8:AN=1:DP=72	GT:DP:GQ:EC:SG	1:5:12:5:T	1:6:15:6:T	1:7:21:7:T	0/1:26:14:6:Y	1:19:54:19:T	0:1:30:0:C	0/1:5:4:4:Y	0:3:36:0:C
8812_GGCCGCAGTTTCCTCAGGGAGAAGCAGCCAGCCAC_NODE_2_length_161_cov_8.900621	95	.	G	C	37.5	PASS	NS=8:AN=1:DP=33	GT:DP:GQ:EC:SG	0:3:36:0:G	0:2:33:0:G	0:7:51:0:G	0:1:30:0:G	0:2:33:0:G	0:1:30:0:G	0:11:60:0:G	0/1:6:27:4:S
3634_GGCCGCCCTCTCGTGGCCAGTGGGGAGGAGCGCAA_NODE_2_length_280_cov_12.817857	174	.	T	C	63.12	PASS	NS=8:AN=1:DP=235	GT:DP:GQ:EC:SG	0/1:15:78:8:Y	1:17:17:16:C	0/1:38:6:7:Y	0:68:211:0:T	0/1:48:57:13:Y	0/1:14:66:6:Y	0:29:57:0:T	0/1:6:13:2:Y
1609_GGCCGATATAAAGTAATTAGATGAAAAAGCAATGT_NODE_2_length_253_cov_26.245060	26	.	T	C	19.62	PASS	NS=8:AN=1:DP=59	GT:DP:GQ:EC:SG	1:4:9:4:C	1:15:42:15:C	1:14:39:14:C	1:7:18:7:C	1:5:12:5:C	1:7:18:7:C	1:6:15:6:C	1:1:4:1:T
6474_GGCCGAGGCAACTCAAATCACAGTGGATCTGAAGA_NODE_2_length_273_cov_7.849817	76	.	G	T	31.38	PASS	NS=8:AN=1:DP=84	GT:DP:GQ:EC:SG	0:2:33:0:G	0/1:16:51:6:K	0:16:75:0:G	0/1:11:17:3:K	0/1:15:17:2:G	0:8:51:0:G	0/1:14:3:3:K	0/1:2:4:1:G
6672_GGCCGGGGTAGAGGGTCACTTTAGGGACCGCCCTG_NODE_2_length_334_cov_7.197605	51	.	C	T	25.29	PASS	NS=7:AN=1:DP=35:AS=GGAAGGTCTGCAGAAACCTGTTCAGCATCACAGCTCTCTAGTACAGAAGG[C/T]GAGAATTCTACCACTGAACCACATACAACCTCTCAAAGGGAAGCCATTTG	GT:DP:GQ:EC:SG	.:0:0:0:.	0/1:17:65:9:Y	1:8:21:8:T	0/1:2:4:1:C	0:1:30:0:C	1:1:9:1:C	0:5:42:0:C	1:1:6:1:C
7419_GGCCGGGTGTTTGCATAGAACGTTATCCGCTGAAT_NODE_2_length_176_cov_9.522727	34	.	G	C	72.88	PASS	NS=8:AN=1:DP=529	GT:DP:GQ:EC:SG	0/1:22:111:15:S	0/1:162:51:133:C	0/1:110:91:70:S	0/1:61:83:43:S	0/1:59:91:38:S	0/1:17:73:12:S	0/1:84:18:69:S	0/1:14:65:7:S
5175_GGCCGCGGGACGCTTGGTGCCTCAGGGAAGGGTTT_NODE_2_length_254_cov_19.889763	185	.	T	C	66.25	PASS	NS=8:AN=1:DP=213	GT:DP:GQ:EC:SG	0/1:42:19:9:Y	0:2:33:0:T	0:13:66:0:T	0:46:168:0:T	0/1:37:80:21:Y	0/1:18:47:7:Y	0:28:111:0:T	0/1:27:6:5:Y
1882_GGCCGCTTCACCTCCAAACATCAGTTTTGTAATCT_NODE_2_length_244_cov_14.901639	69	.	T	G	76.75	PASS	NS=8:AN=1:DP=160	GT:DP:GQ:EC:SG	0/1:14:34:5:K	0:19:84:0:T	0/1:23:74:13:K	0:25:102:0:T	0:24:99:0:T	0:16:75:0:T	0/1:26:78:17:K	0/1:13:68:8:K
2899_GGCCGCCGCGGCCCCGTCATCCTCCCTCCTCTCCG_NODE_4_length_179_cov_6.525140	51	.	C	A	19.43	PASS	NS=7:AN=1:DP=48:AS=TGCAGCTGAAGAGGGATCAGAGTGCGTTCCAAAGCACAGGGCCTGGGCAG[C/A]GACCTCTCTTGCCCAGAATTAAGGGCAACAAAAGGCAATATAGGTAGTCG	GT:DP:GQ:EC:SG	1:3:6:3:A	1:11:30:11:A	1:12:33:12:A	0/1:3:16:2:M	1:3:6:3:A	1:5:12:5:A	1:11:33:11:A	.:0:0:0:.
631_GGCCGCTCACCGAAGGCTTAGAGGTTCAAATGCAC_NODE_2_length_267_cov_7.033708	186	.	G	A	45.12	PASS	NS=8:AN=1:DP=166	GT:DP:GQ:EC:SG	0:9:54:0:G	0:16:46:0:G	0/1:40:16:8:R	0:43:77:0:G	0:15:72:0:G	0:15:41:0:G	0/1:19:32:5:R	0/1:9:23:1:G
4018_GGCCGATGCAACTAAGGATTGCAAGCATTTAGGTC_NODE_2_length_332_cov_21.578314	280	.	T	C	92.5	PASS	NS=8:AN=1:DP=248:AS=AATACATTCTTGTTAAGAATTTTTTTATTCATGTGTTCAGAATATTGACC[T/C]TTTCCTCTACATTACTGAATAGGTGGAGCGGGAGAACGGGTGCTGTTTCC	GT:DP:GQ:EC:SG	0:26:105:0:T	0:16:75:0:T	0/1:16:20:3:T	0:46:165:0:T	0/1:39:22:13:Y	0:33:126:0:T	1:33:80:33:C	0:39:147:0:T
5194_GGCCGAGACAGTGGAGGCTGTGGTTGAGGACCTGC_NODE_4_length_162_cov_14.030864	47	.	G	T	59.14	PASS	NS=7:AN=1:DP=97	GT:DP:GQ:EC:SG	0:10:57:0:G	0:13:66:0:G	0/1:24:33:5:K	0:15:72:0:G	0:8:51:0:G	0:9:54:0:G	0:18:81:0:G	.:0:0:0:.
797_GGCCGATTATTGGCGTAGCTATAAAGCCTCGGCTG_NODE_2_length_307_cov_23.547232	231	.	A	G	96.62	PASS	NS=8:AN=1:DP=438:AS=TCACCCCTTGCTTAGTTTCACTATCTAGTCAATAGGAAGAAACCGTTGGC[A/G]TTTCTTACTGGAGAGGAATAAGGGAGGGTTTTGCTTAAAAAGGGAGCCCT	GT:DP:GQ:EC:SG	0:37:138:0:A	0/1:63:84:23:R	0/1:82:109:44:R	0/1:82:103:37:R	0/1:56:100:25:R	0/1:33:83:22:R	0/1:67:102:30:R	1:18:54:18:G
1264_GGCCGCCGGATCAGACCAGCAGCTACTCACGCTGG_NODE_2_length_299_cov_10.795986	90	.	G	C	48	PASS	NS=7:AN=1:DP=86	GT:DP:GQ:EC:SG	0/1:4:7:2:S	0:13:66:0:G	0:25:102:0:G	0:10:57:0:G	0/1:16:14:5:S	0/1:6:27:3:S	0:12:63:0:G	.:0:0:0:.
1248_GGCCGCTATTTGCATACGGCTTATTTGCATGGAAC_NODE_2_length_237_cov_6.059072	170	.	T	C	57	PASS	NS=8:AN=1:DP=178	GT:DP:GQ:EC:SG	1:16:45:16:C	0/1:7:24:1:T	1:7:21:7:C	0:47:168:0:T	1:36:101:36:C	1:10:27:10:C	0/1:25:56:12:Y	0/1:30:14:8:Y
7334_GGCCGGCAGAAAGAATAGAAGAGGGGTATACTATG_NODE_2_length_306_cov_10.382353	69	.	G	A	23.86	PASS	NS=7:AN=1:DP=34	GT:DP:GQ:EC:SG	1:2:3:2:A	0/1:7:52:5:R	0/1:12:29:10:R	0/1:6:11:5:R	0:1:30:0:G	0:1:30:0:G	1:5:12:5:A	.:0:0:0:.
7463_GGCCGTGGAGACTTCTGAAATTGAGTGCTACCATA_NODE_2_length_222_cov_6.783784	184	.	C	T	32.88	PASS	NS=8:AN=1:DP=50	GT:DP:GQ:EC:SG	0/1:3:8:2:Y	0:2:33:0:C	0/1:4:22:3:Y	0:10:57:0:C	0/1:14:66:8:Y	0/1:7:26:1:C	0/1:8:43:5:Y	0/1:2:8:1:C
4573_GGCCGTGGGGCGGAGAGCCGGGGTACGCACCTGGG_NODE_2_length_308_cov_3.512987	283	.	G	A	27.75	PASS	NS=8:AN=1:DP=64	GT:DP:GQ:EC:SG	0:13:66:0:G	1:6:15:6:A	1:13:39:13:A	0/1:22:32:10:R	0/1:3:16:1:G	0:2:33:0:G	0/1:4:7:2:G	1:1:14:1:G
2157_GGCCGGGGGTCCTCCTTATTGAGGAGAACTCTGCT_NODE_2_length_277_cov_4.916967	266	.	A	G	22.33	PASS	NS=6:AN=1:DP=35	GT:DP:GQ:EC:SG	1:10:30:10:G	.:0:0:0:.	.:0:0:0:N	0/1:16:56:10:R	0:2:39:0:A	1:2:3:2:G	0/1:3:3:2:R	1:2:3:2:G
3297_GGCCGACACCCTGATCTTGGACTCCCCGCCTCCAG_NODE_2_length_311_cov_15.961414	242	.	C	T	86.88	PASS	NS=8:AN=1:DP=347:AS=CTGAGAACACTTTGAATCTTGCTGCTTATCCAGCTTTGTGGCAGAGGGCT[C/T]TCAGGTGAAACTTTGCAGCGAGCTAGAAGTGGTTCATGCAGGACTGGGCT	GT:DP:GQ:EC:SG	0:26:105:0:C	0:19:84:0:C	0/1:36:57:13:Y	0/1:79:70:36:Y	0/1:66:73:30:Y	0:42:153:0:C	0/1:60:69:39:Y	0:19:84:0:C
7394_GGCCGCTTTCCCTCTGTGGAGGGGCCGAGTAGGTG_NODE_2_length_282_cov_9.865249	67	.	A	G	68	PASS	NS=8:AN=1:DP=202	GT:DP:GQ:EC:SG	0:19:84:0:A	0:58:202:0:A	0/1:32:72:16:R	0/1:22:64:12:R	0/1:21:0:4:A	0/1:8:30:1:A	0/1:38:53:14:R	0:4:39:0:A
5314_GGCCGGCAGGCCCGTCGGGGACCGGAGCTGCCGGG_NODE_2_length_239_cov_11.786611	222	.	C	T	16.38	PASS	NS=8:AN=1:DP=45	GT:DP:GQ:EC:SG	1:10:30:10:T	1:1:11:1:C	1:3:6:3:T	1:5:15:5:T	1:4:9:4:T	1:4:9:4:T	1:16:48:16:T	1:2:3:2:T
8074_GGCCGGAGGATTCGAACTACTGACTTTATGGTTAG_NODE_2_length_316_cov_6.193038	29	.	G	T	21.67	PASS	NS=6:AN=1:DP=82	GT:DP:GQ:EC:SG	.:0:0:0:.	0/1:17:20:4:K	0/1:36:16:5:G	0:5:42:0:G	0/1:4:16:2:K	0:3:36:0:G	0/1:17:0:3:G	.:0:0:0:.
2842_GGCCGATCCAGTGGACGCGGGAGTCGAGCGCCGAG_NODE_2_length_308_cov_18.405844	274	.	C	A	66	PASS	NS=8:AN=1:DP=219	GT:DP:GQ:EC:SG	0:11:60:0:C	0/1:10:33:4:M	0/1:27:75:14:M	0/1:44:71:16:M	1:36:105:36:A	0/1:33:44:25:M	0/1:40:88:23:M	0:18:52:0:C
453_GGCCGGCTGGGGTGCAGAAATTTGCACGGCTAATG_NODE_2_length_199_cov_6.809045	83	.	A	G	45.29	PASS	NS=7:AN=1:DP=76:AS=GGCTCCGTTTAGGCTCGCGAGTCTGATTTTTATTTCGATGGCACTTCCTT[A/G]GATTTTCCAATTCATGTCTAAATCACAAAATGTGTCCATTGTGTACTTGT	GT:DP:GQ:EC:SG	0/1:4:2:2:A	0:12:63:0:A	0:8:51:0:A	0/1:29:48:9:R	0:11:60:0:A	.:0:0:0:.	0:11:63:0:A	0:1:30:0:A
1774_GGCCGTTCTCAGGGGAAATAATTCTTTGCCAAAAG_NODE_2_length_319_cov_10.993731	94	.	G	A	44	PASS	NS=8:AN=1:DP=124:AS=GTAGGGAATATCTGCCTTCTGGTTATAACGCTCTTTTCTGTTACCCTTGC[G/A]GCCAAAGGTCTCAGAAATTCCAAAATGTCTGAGGGAATAATGACACAATG	GT:DP:GQ:EC:SG	1:6:15:6:A	1:36:108:36:A	1:33:96:33:A	0/1:6:13:5:R	1:15:42:15:A	1:9:24:9:A	1:16:48:16:A	1:3:6:3:A
7892_GGCCGTGGCCCAAGTCCTTTACTGTCCATTGGGGA_NODE_2_length_214_cov_13.271028	181	.	A	G	27.71	PASS	NS=7:AN=1:DP=64	GT:DP:GQ:EC:SG	0/1:2:4:1:A	1:1:7:1:A	0:6:45:0:A	0/1:26:60:12:R	0/1:6:11:2:R	.:0:0:0:N	0/1:15:37:2:A	0/1:8:30:1:A
5858_GGCCGACAAAGCGCGCCGCCGGACCTGGGACGGTA_NODE_2_length_291_cov_26.024055	275	.	T	C	19.38	PASS	NS=8:AN=1:DP=163	GT:DP:GQ:EC:SG	0/1:29:1:5:Y	0/1:14:51:7:Y	1:7:18:7:C	0/1:49:17:12:Y	0/1:30:34:9:Y	0/1:23:18:4:T	1:5:12:5:C	0/1:6:4:2:Y
616_GGCCGGCGCCGCCAGATGCGTGTGAGGAATTGCCT_NODE_2_length_169_cov_17.449703	56	.	A	T	96.88	PASS	NS=8:AN=1:DP=269:AS=GGAGGAAGGAGTCTCGTTCGCTCCTTCCACCAGAATTCTCAGGTACCGGC[A/T]AGATCCTTGATCAGAGAACTCGGTTCATTCAAAGGACCCAGGCTGGAGAC	GT:DP:GQ:EC:SG	1:27:78:27:T	0/1:19:86:12:W	1:36:105:36:T	0:64:214:0:A	0/1:38:74:17:W	0/1:18:63:9:W	0/1:54:86:25:W	0/1:13:69:8:W
2497_GGCCGGGCGGAGAGCGGCGCGTCCCGGCTGTTCTG_NODE_2_length_226_cov_17.097345	152	.	T	C	95.88	PASS	NS=8:AN=1:DP=316:AS=TCACGTCATTTCCAGATTTCATGAACAGATAATCTCCAAGGTATCACACT[T/C]AAGTTAAAGCGACGGGACTTTTTCCCTCCCCCGTCCTTCTACACGCCTCA	GT:DP:GQ:EC:SG	0/1:22:92:13:Y	0/1:39:70:15:Y	0:47:168:0:T	0/1:76:80:31:Y	0/1:49:93:30:Y	0/1:25:88:13:Y	1:47:127:47:C	0/1:11:49:5:Y
650_GGCCGCACCTTTCTCCCGTGGAAGCCGCTCGGCCC_NODE_2_length_329_cov_14.124620	58	.	G	A	36.5	PASS	NS=8:AN=1:DP=180	GT:DP:GQ:EC:SG	0:1:30:0:G	0/1:80:57:11:G	0/1:40:79:15:R	0/1:21:7:4:R	0/1:10:31:1:G	0/1:7:16:1:G	0/1:20:42:6:R	0:1:30:0:G
9198_GGCCGACATCCTTTCTTTCATCCACACAGCGGTCT_NODE_2_length_242_cov_6.239669	34	.	C	T	35.29	PASS	NS=7:AN=1:DP=52	GT:DP:GQ:EC:SG	0:8:51:0:C	0/1:13:15:2:C	0:7:48:0:C	0:14:39:0:C	.:0:0:0:N	0/1:4:22:2:Y	0:3:36:0:C	0:3:36:0:C
9933_GGCCGGACTCTGCCAATTGGCTCACTTGATAACTG_NODE_2_length_339_cov_12.395280	47	.	A	T	18.5	PASS	NS=6:AN=1:DP=42	GT:DP:GQ:EC:SG	.:0:0:0:.	1:27:78:27:T	1:3:6:3:T	1:3:6:3:T	1:2:3:2:T	1:1:0:1:A	1:6:18:6:T	.:0:0:0:.
1556_GGCCGATGGGCTGCAGACTGCAGCGCGCTCATAGG_NODE_2_length_187_cov_5.850267	73	.	G	T	92.5	PASS	NS=8:AN=1:DP=285:AS=TTGGGCGGCGCGCTTCGGTCCTCCCGCTCAGATCCAGGTCTGGGCCGGTG[G/T]GAGGTAGCCCTTCGACCCACTGCTCTGCATCGCGGGCGCAAGGAATTCCT	GT:DP:GQ:EC:SG	0:23:96:0:G	0:36:138:0:G	1:54:112:54:T	0/1:56:72:35:K	0/1:44:72:25:K	1:21:69:21:T	0:49:178:0:G	1:2:3:2:T
1871_GGCCGCATAAATTGGTCCTCAGACCCGAGTTCCCA_NODE_2_length_326_cov_9.840490	42	.	G	A	21.14	PASS	NS=7:AN=1:DP=56	GT:DP:GQ:EC:SG	1:1:1:1:G	1:20:57:20:A	1:20:57:20:A	0/1:7:15:6:R	1:2:3:2:A	1:3:6:3:A	1:3:9:3:A	.:0:0:0:.
10859_GGCCGCGTCGCGAGCTCTGGGTTCCGCCCAGCGGC_NODE_2_length_339_cov_12.929204	108	.	C	T	52.62	PASS	NS=8:AN=1:DP=139:AS=TGGTTCTGTGTCCTCTTCTGAATCCGGCTTGAATTTCTGGCAGTTCCTGT[C/T]GATATACTGCATTAGCGCAATGTCCTCCAAATTCATTCAGGTCGTGAGAT	GT:DP:GQ:EC:SG	0/1:7:21:3:Y	0/1:29:95:18:Y	0/1:33:91:21:Y	0/1:24:62:8:Y	1:13:36:13:T	0/1:10:53:5:Y	1:20:57:20:T	1:3:6:3:T
4339_GGCCGTGAGGATGAAATGAGATAGTACTTACAGAG_NODE_2_length_299_cov_5.093646	211	.	T	C	62.5	PASS	NS=8:AN=1:DP=190:AS=CCCGTCTACGCCATGCGGAGCCACAGGATCGGCCTCTGCAACTCCCCATC[T/C]GTCCCCAGAGAGGGTGGCACCCAGGGTTTTCATCCCAGGTAGGTGAAATC	GT:DP:GQ:EC:SG	1:10:27:10:C	0/1:20:25:6:Y	0/1:55:82:23:Y	0:21:90:0:T	0/1:37:78:27:Y	0:9:54:0:T	0:35:138:0:T	1:3:6:3:C
4950_GGCCGCCTCTCTTTCTACAGATAGGGAAACTGAGG_NODE_2_length_303_cov_9.174917	69	.	G	A	39.71	PASS	NS=7:AN=1:DP=62:AS=CCTTCTCAACTATAAAATGTTCAAAATACATTGCTGTACCTAGTTCACAG[G/A]TTGAAAAGCAGCACACATAAGAATGTAAAAGCGATTTTTATTTAGATCTG	GT:DP:GQ:EC:SG	0:1:30:0:G	0/1:25:60:9:R	0/1:5:14:1:G	0:15:72:0:G	0:3:36:0:G	0/1:4:12:1:G	0:9:54:0:G	.:0:0:0:.
7826_GGCCGCGAGACCCAGTAAGAGTCACTGAGATTCGC_NODE_2_length_312_cov_9.820513	49	.	G	A	15.67	PASS	NS=6:AN=1:DP=42	GT:DP:GQ:EC:SG	.:0:0:0:.	1:14:39:14:A	1:8:21:8:A	0/1:8:7:7:R	1:4:9:4:A	1:3:6:3:A	1:5:12:5:A	.:0:0:0:.
9719_GGCCGCTGTCCAGGAAAACAGGCAGGAGTCACCTG_NODE_2_length_169_cov_6.420118	143	.	T	C	28	PASS	NS=8:AN=1:DP=52	GT:DP:GQ:EC:SG	0/1:4:12:3:Y	0:1:30:0:T	0:1:30:0:T	0:21:90:0:T	0/1:7:5:2:T	0/1:12:45:9:Y	1:2:3:2:C	1:4:9:4:C
9401_GGCCGCACGGCCCAGCCCCAAAGCCTCCAGTTGGC_NODE_2_length_277_cov_19.104692	38	.	T	C	21.88	PASS	NS=8:AN=1:DP=66	GT:DP:GQ:EC:SG	1:4:9:4:C	1:17:48:17:C	1:14:39:14:C	0/1:7:16:6:Y	1:9:24:9:C	1:3:6:3:C	1:11:30:11:C	1:1:3:1:C
8700_GGCCGCGATCCCCGTGCCGGTGTTACAAGAGAATC_NODE_2_length_304_cov_10.930921	173	.	C	T	65.75	PASS	NS=8:AN=1:DP=216:AS=ATAATAATCACGGCATGTCATGTGGTTATTTTGAAGAGGAAATGAGACCA[C/T]GCATGTAGTGCATCAATGCGCAATGCCTGGAACACAGAACCCAGTAAAAA	GT:DP:GQ:EC:SG	0/1:25:25:21:Y	1:22:63:22:T	0/1:15:32:2:C	0/1:44:49:11:Y	1:28:81:28:T	0/1:24:94:16:Y	1:45:132:45:T	0/1:13:50:6:Y
3289_GGCCGGGTATTTGCATAGAATGTTCTCCGCGGAAT_NODE_4_length_151_cov_9.125828	152	.	C	T	28.12	PASS	NS=8:AN=1:DP=76	GT:DP:GQ:EC:SG	0/1:3:10:1:C	0/1:22:53:12:Y	0/1:10:34:1:C	0:14:43:0:C	0/1:13:10:4:Y	0/1:7:26:1:C	0:2:33:0:C	0/1:5:16:1:C
9655_GGCCGGCCCGAGGAGGGACAGCTGTCGCTTACATT_NODE_2_length_330_cov_5.184848	251	.	G	A	49.5	PASS	NS=8:AN=1:DP=101:AS=AAATACACATTCGCCACGCGTTTCTTTCTGGATTGCCCACGCAGGGTTCT[G/A]CGTGGTCAGGCACTCGCATCCAAATACAGGGGAAGACTTGAGCTGACGAA	GT:DP:GQ:EC:SG	0/1:14:37:11:R	1:5:12:5:A	0/1:4:20:2:R	0:22:93:0:G	0:16:75:0:G	0/1:10:42:4:R	1:19:54:19:A	0:11:63:0:G
4923_GGCCGGTAATTTCATCAGACTCCATACCCAATTCG_NODE_2_length_176_cov_8.340909	124	.	A	G	25.75	PASS	NS=8:AN=1:DP=90	GT:DP:GQ:EC:SG	0:2:33:0:A	1:3:6:3:G	0/1:19:47:6:R	0/1:32:10:6:R	0/1:14:26:4:R	0/1:5:18:4:R	0/1:8:44:4:R	0/1:7:22:3:R
228_GGCCGAGCGGGCGCGGGCTCGGGGAGCGGAAGACC_NODE_2_length_212_cov_10.844339	12	.	C	T	43.88	PASS	NS=8:AN=1:DP=51	GT:DP:GQ:EC:SG	0:7:48:0:C	0:7:48:0:C	0/1:12:45:6:Y	0:11:60:0:C	0:3:36:0:C	0:1:30:0:C	0:7:48:0:C	0:3:36:0:C
3629_GGCCGTGCTGTTTCTCACCACAGAGCATCTGTTGA_NODE_2_length_202_cov_13.361386	158	.	A	G	78	PASS	NS=6:AN=1:DP=136:AS=ATCGGGGTGGAAACATGTCCACTCTGGGAGCAGCAGCAGGTCACTTGCCT[A/G]CCAGTACAGCGGGTGTTTGGAGCCAGTAGAAAATTGGTGGGCTCTTGTCC	GT:DP:GQ:EC:SG	0:14:69:0:A	1:10:36:10:G	1:24:69:24:G	0:46:171:0:A	1:17:51:17:G	1:25:72:25:G	.:0:0:0:.	.:0:0:0:.
1944_GGCCGTGGGCTTCCTGGTCGGAGCCCGGGTGACTG_NODE_2_length_306_cov_10.316994	139	.	C	G	67.88	PASS	NS=8:AN=1:DP=233:AS=CTGCACACTTTAAAAAGATTAAAAGAAAGGCTGTTTTAAGGGCTTCCTTT[C/G]GACCAAAGAACGCGCCAGCTGACTGGTAGGAGTTAGACAAGCCGCAAAGT	GT:DP:GQ:EC:SG	0/1:21:33:6:S	0/1:47:88:30:S	0/1:72:68:25:S	0/1:28:85:14:S	0/1:23:92:16:S	1:9:24:9:G	0:26:105:0:C	0:7:48:0:C
7150_GGCCGGGCTGGTCCAGGAAGTCCCTCCGACCACCG_NODE_2_length_318_cov_5.424528	286	.	G	C	34.25	PASS	NS=8:AN=1:DP=143	GT:DP:GQ:EC:SG	0/1:12:51:6:S	0/1:7:4:2:G	0/1:11:10:3:S	0/1:46:70:20:S	0/1:25:17:7:S	0/1:19:42:13:S	0/1:13:35:9:S	0/1:10:45:6:S
5402_GGCCGTTGCTGGGACGCATCTGTTGCTAAGAAAAA_NODE_2_length_272_cov_18.551470	14	.	T	C	25.57	PASS	NS=7:AN=1:DP=33	GT:DP:GQ:EC:SG	.:0:0:0:.	0/1:6:5:3:Y	0:9:54:0:T	1:4:9:4:C	0:1:30:0:T	1:2:3:2:C	0/1:10:48:6:Y	0:1:30:0:T
9650_GGCCGCAGCCCCGCTGCATCCCCGCGCGCGGCCAG_NODE_2_length_334_cov_5.014970	266	.	T	C	85.62	PASS	NS=8:AN=1:DP=186	GT:DP:GQ:EC:SG	0:22:93:0:T	0/1:9:5:8:C	0:49:175:0:T	0:50:178:0:T	0/1:19:55:10:Y	0/1:10:41:5:Y	0:19:84:0:T	0:8:54:0:T
5029_GGCCGTGCGGTCAGATTTTCCGTAGAAACTTAAAC_NODE_2_length_341_cov_8.313783	66	.	T	C	43.38	PASS	NS=8:AN=1:DP=63:AS=CTTCGTGTTGTGGGTGTGGGCTGAACGAGATGAGGTGTGTAAGGGACTTA[T/C]GCTGTGCCTGGTCCCAAACACTCAGTACCCCATAAATGGGGGCTACCGAT	GT:DP:GQ:EC:SG	0:1:30:0:T	0:28:111:0:T	0:12:66:0:T	0:11:60:0:T	0:4:42:0:T	1:2:3:2:C	0/1:4:5:1:T	0:1:30:0:T
7646_GGCCGCGAGCCTGTGCATCCTTGGAAGACATCCTT_NODE_2_length_295_cov_12.467796	273	.	A	G	63	PASS	NS=8:AN=1:DP=104	GT:DP:GQ:EC:SG	0:10:57:0:A	0:3:36:0:A	0:9:54:0:A	0:32:129:0:A	0:14:69:0:A	0:13:66:0:A	1:13:36:13:G	0:10:57:0:A
10031_GGCCGTGTACCTCTGTGCCAGCAGCTTAGACACAG_NODE_1_length_159_cov_21.735849	80	.	A	G	34.33	PASS	NS=6:AN=1:DP=99	GT:DP:GQ:EC:SG	.:0:0:0:.	0/1:53:73:4:A	0/1:22:59:7:R	0/1:8:18:1:A	0/1:11:17:3:R	0:1:30:0:A	1:4:9:4:G	.:0:0:0:.
5937_GGCCGGCGGAGGGCAGAGCCGGACGGAGCCCGGCA_NODE_2_length_251_cov_14.972112	23	.	T	G	14	PASS	NS=6:AN=1:DP=38	GT:DP:GQ:EC:SG	.:0:0:0:.	1:4:9:4:G	1:8:21:8:G	0/1:8:9:7:K	1:9:24:9:G	1:3:6:3:G	1:6:15:6:G	.:0:0:0:.
8822_GGCCGGCCAGAGCGCAGAGTGGTGGGCTTGGGAGC_NODE_2_length_243_cov_13.732511	84	.	C	T	98.62	PASS	NS=8:AN=1:DP=301:AS=CCACACCCCCCCTTGATCCATTTCCTCCACCTCATCCTGGTCTCCTTGTC[C/T]GTGTCCCTCAGCACCCTGCACAGGTTCCTGTCTTGGTAACTGTGACACTC	GT:DP:GQ:EC:SG	0/1:25:78:11:Y	0/1:39:61:13:Y	0/1:70:94:38:Y	0:54:190:0:C	0:40:147:0:C	0:15:72:0:C	0/1:48:90:25:Y	0:10:57:0:C
6269_GGCCGCCCCTCGCGCCAGCTAGCGGTCCCTAGCGA_NODE_2_length_318_cov_5.896226	82	.	A	C	34.88	PASS	NS=8:AN=1:DP=99:AS=TTATGGCACCCATGATTAGGCTCTCTGGAGTTAATCTATCGGGGCAAATC[A/C]CTCAGCAAAGGCTTTCACGGAGAGACACGGAGTCCAATGGCAGTTACATT	GT:DP:GQ:EC:SG	1:4:9:4:C	1:30:90:30:C	1:26:78:26:C	1:15:42:15:C	1:9:24:9:C	1:4:9:4:C	1:9:24:9:C	1:2:3:2:C
10950_GGCCGTTTTGAGCGGCTTGCTTTTTCTCCTGGTAG_NODE_4_length_170_cov_8.323529	61	.	A	G	28.86	PASS	NS=7:AN=1:DP=79	GT:DP:GQ:EC:SG	0/1:6:8:2:R	0/1:21:76:10:R	0:16:47:0:A	0/1:25:20:6:R	.:0:0:0:.	0/1:8:17:3:R	0:1:30:0:A	0/1:2:4:1:A
5375_GGCCGCTCCATGAATGAGGATTTGTGTTCGTTCCC_NODE_2_length_285_cov_8.308772	56	.	T	C	14.14	PASS	NS=7:AN=1:DP=40:AS=CGGTGGTCGTGAATAAAAGAGAAACATTCATTTATGGTAATTGGTTTCAG[T/C]TCCTCACTTGGCTGCTTGTCCTGACCTAAATGTATCCAGTTGTTCCCTCT	GT:DP:GQ:EC:SG	1:4:9:4:C	1:10:27:10:C	1:8:21:8:C	1:2:3:2:C	1:7:18:7:C	1:6:15:6:C	1:3:6:3:C	.:0:0:0:.
5480_GGCCGCTTTCCCAAGCCCTTCCAGCTCAAACTATG_NODE_2_length_286_cov_7.506993	194	.	C	G	100	PASS	NS=8:AN=1:DP=355	GT:DP:GQ:EC:SG	0/1:83:58:36:S	0:98:255:0:C	0:12:66:0:C	0:42:124:0:C	0/1:36:73:3:C	0:15:72:0:C	0:23:96:0:C	0/1:46:56:18:S
1829_GGCCGTGGCCACACTACAGAGCCGGACTCTGGGCC_NODE_2_length_302_cov_19.122517	213	.	G	T	78.75	PASS	NS=8:AN=1:DP=153:AS=AAAAGCCTGAGGGAAAATCCCTTCTCTGTTTTACAAGAACATTTTTATGC[G/T]AATACATAAAACATGCTTTTGTTTTAGACCAAGGTGCCTTTAACAACCGG	GT:DP:GQ:EC:SG	1:58:153:58:T	0:1:30:0:G	0:8:51:0:G	0:12:63:0:G	0:14:69:0:G	0:3:36:0:G	0:13:69:0:G	0:44:159:0:G
262_GGCCGAGCCACTGCAGCCAACCAGGAAGCTTGGAG_NODE_2_length_269_cov_4.122676	53	.	G	A	35.5	PASS	NS=8:AN=1:DP=35:AS=AGATGAGGAAATTGAAGATTTTTACCAACTTCTGCAGTCAAAAATTGCTC[G/A]AACTTACCATCAAGATGCTTTGACAGGACTTCCGGCCAATGTGGTGCCAT	GT:DP:GQ:EC:SG	1:2:3:2:A	0:2:33:0:G	0:11:60:0:G	0:3:36:0:G	0:2:33:0:G	0/1:7:41:5:R	0:6:45:0:G	0:2:33:0:G
6956_GGCCGCTGCAGCGCCCCAGTCCTCGAGGCACACGG_NODE_2_length_303_cov_3.854785	102	.	A	G	77.29	PASS	NS=7:AN=1:DP=142:AS=TTGGGGCTATTTTTCAGGGGCCAAGTCAGATGCAGAAGGAGGTATCGCAG[A/G]AGACGCCTTAACAGCCTCAGAACTGAGCCTCCCGTTGCGCCCTCCCCTTC	GT:DP:GQ:EC:SG	0/1:13:63:8:R	0:24:102:0:A	0:45:165:0:A	0:21:90:0:A	0/1:12:41:8:R	0:10:60:0:A	0/1:17:20:5:R	.:0:0:0:.
4490_GGCCGTGAGGGGAGGGGAGTGTCCTGCGTCCCGCT_NODE_2_length_294_cov_14.071428	66	.	T	G	55.12	PASS	NS=8:AN=1:DP=107:AS=TGGGGCTGTGACAGGGTTGGGGTGATGGCGAGGAGTGAGGCTGCACTTGC[T/G]GAGCACAGGTCGTGGGGTTCTAGGCCTGTCCCCATCTGGAATTTGCTCTG	GT:DP:GQ:EC:SG	0/1:2:3:1:T	0:29:114:0:T	0/1:25:93:16:K	0:24:99:0:T	0/1:9:7:2:T	0:7:48:0:T	0/1:9:44:6:K	0:2:33:0:T
8901_GGCCGTGTACCTCTGTGCCAGCAGCTTAGCCACAG_NODE_2_length_287_cov_14.278746	214	.	C	T	83	PASS	NS=8:AN=1:DP=243	GT:DP:GQ:EC:SG	0:9:54:0:C	0:13:66:0:C	0/1:44:14:7:C	0:62:208:0:C	0:30:117:0:C	0:38:147:0:C	1:28:21:26:T	0/1:19:37:2:C
1075_GGCCGACAGCGCGCACAGAACCGACCCGCACTCCT_NODE_2_length_278_cov_10.471223	48	.	G	A	13.88	PASS	NS=8:AN=1:DP=41	GT:DP:GQ:EC:SG	1:2:3:2:A	1:10:27:10:A	1:6:15:6:A	1:6:18:6:A	1:5:12:5:A	1:2:3:2:A	1:9:24:9:A	1:1:9:1:G
8338_GGCCGTCATGGTCCCGAAACCTTCTGTTGGTCCAG_NODE_2_length_239_cov_7.054393	41	.	C	T	36.29	PASS	NS=7:AN=1:DP=27	GT:DP:GQ:EC:SG	.:0:0:0:.	0/1:4:23:2:Y	0:5:42:0:C	0:8:51:0:C	0:3:36:0:C	0:1:30:0:C	0:3:36:0:C	0:3:36:0:C
7866_GGCCGCCCTTTGTGCAACCGACGCGAGACTGCGGA_NODE_2_length_289_cov_4.730104	90	.	A	G	44.5	PASS	NS=8:AN=1:DP=161:AS=AGCACACAGGATGTGGTTTGGCGGCAGGGTTCTTTCCCCTCCGATTTGGG[A/G]AATTATCACATGGGGCCTTCTTGAGCTGGTGTGAAAGAGAGGCAGCGTGA	GT:DP:GQ:EC:SG	1:6:15:6:G	1:32:81:32:G	1:58:80:57:G	1:25:72:25:G	1:7:18:7:G	1:5:12:5:G	1:26:75:26:G	1:2:3:2:G
2000_GGCCGTGTATTACTGTGCGAAAGACACAGTGAGGG_NODE_5_length_210_cov_20.195238	205	.	T	G	18.86	PASS	NS=7:AN=1:DP=28	GT:DP:GQ:EC:SG	0:2:33:0:T	.:0:0:0:.	0:3:36:0:T	0/1:6:12:2:K	0/1:3:17:2:K	0/1:5:11:1:T	1:3:6:3:G	0/1:6:17:1:T
11085_GGCCGCAGGGGGTCCGGCGCCGCCTCACTACTGCC_NODE_2_length_232_cov_13.530172	47	.	T	C	6.43	q10	NS=7:AN=1:DP=18	GT:DP:GQ:EC:SG	1:1:4:1:T	1:1:4:1:T	1:2:3:2:C	1:8:21:8:C	1:2:3:2:C	.:0:0:0:.	1:3:6:3:C	1:1:4:1:T
4327_GGCCGTTCAGAAGAGCCCTCCATTTTCCTCATGGA_NODE_2_length_222_cov_4.648649	33	.	A	C,G	36.71	PASS	NS=7:AN=2:DP=68	GT:DP:GQ:EC:SG	0:2:33:0:A	0/2:12:6:2:A	0:6:45:0:A	0/1:14:28:7:M	0:15:72:0:A	.:0:0:0:.	0/1:14:31:2:A	0:5:42:0:A
9863_GGCCGCGCAGCCGCGTGGCAGCACTGCCGAGCTAG_NODE_2_length_195_cov_17.128204	75	.	T	G	117.88	PASS	NS=8:AN=1:DP=310:AS=AATTTACCAGCTGCAATATGGGAACTCTATGGGGCAGTTTTACTCTGTCC[T/G]ATAGAGTCAGAACCAACGGATGGCAATGGGTTTGGTTAGACTTCAAGGCC	GT:DP:GQ:EC:SG	0/1:18:77:12:K	1:75:157:75:G	1:51:146:51:G	0:57:172:0:T	0:33:126:0:T	0/1:23:93:11:K	1:45:132:45:G	0/1:8:40:4:K
3485_GGCCGAGTGCCATGGGCAGAAAACATTGACACATA_NODE_6_length_160_cov_18.825001	11	.	C	G	17.5	PASS	NS=8:AN=1:DP=47	GT:DP:GQ:EC:SG	0:1:30:0:C	0/1:24:70:18:S	0/1:7:15:6:S	0/1:2:0:1:C	1:2:3:2:G	1:3:6:3:G	0/1:7:14:3:S	1:1:2:1:C
6065_GGCCGAGCTATATTATTTTTACAACATTTTCTCAG_NODE_2_length_288_cov_6.298611	244	.	C	T	58.75	PASS	NS=8:AN=1:DP=112:AS=CCCGGCCAGGGCTGGCACGCAGCACCTCAGCTCTAGGAGAAGCCCCTAGC[C/T]GCTGCCCCTGTGGCCACAAGCCGGGGGATTCATACATCTGCATTAAGGCG	GT:DP:GQ:EC:SG	1:18:54:18:T	1:5:12:5:T	0/1:10:39:7:Y	0:30:120:0:C	0:25:102:0:C	0:3:36:0:C	0/1:15:62:9:Y	0:6:45:0:C
5604_GGCCGGTCAGAAATCAGGAGAGAGCTGAGTCAGCG_NODE_2_length_238_cov_7.268908	99	.	A	G	79.38	PASS	NS=8:AN=1:DP=152:AS=GGTATAACTAGGGGATAATGCTCTCCTGACACAACAAGGCCCTTAGAACT[A/G]TGATCAAGGACAGAAATTCCACCTAGACCATTGTGCTGCTGTGGGAGGGG	GT:DP:GQ:EC:SG	1:13:36:13:G	0:13:66:0:A	0/1:28:101:14:R	0:24:99:0:A	0:33:129:0:A	0:11:60:0:A	0:28:111:0:A	0:2:33:0:A
3247_GGCCGCGAGAGCCAATCCGCTTGCACGGGAGGCCC_NODE_2_length_160_cov_6.825000	149	.	C	G	19.71	PASS	NS=7:AN=1:DP=49	GT:DP:GQ:EC:SG	0:4:39:0:C	.:0:0:0:N	0/1:4:20:1:C	0/1:11:8:3:S	0/1:8:26:3:S	0/1:5:19:1:C	0/1:14:14:4:S	0/1:3:12:2:S
7355_GGCCGCCGCGCCCTCCTTCACTTTTTGTAACGAGA_NODE_2_length_312_cov_8.080129	66	.	C	G	23.71	PASS	NS=7:AN=1:DP=51	GT:DP:GQ:EC:SG	.:0:0:0:.	1:18:54:18:G	1:17:48:17:G	1:4:12:4:G	1:6:15:6:G	1:1:12:1:C	1:4:12:4:G	1:1:13:1:C
6341_GGCCGGGTGGGCCTCCTCTTCCACCTGCCCTGACA_NODE_2_length_316_cov_12.186708	35	.	C	G	45.67	PASS	NS=6:AN=1:DP=49	GT:DP:GQ:EC:SG	.:0:0:0:.	0/1:10:22:3:S	0:17:78:0:C	0:6:45:0:C	0:8:51:0:C	0:1:30:0:C	0:7:48:0:C	.:0:0:0:.
10971_GGCCGGGAAGACATGAGCAACAAAGAAGGTGAAGT_NODE_2_length_324_cov_20.410494	297	.	C	T	94.12	PASS	NS=8:AN=1:DP=197	GT:DP:GQ:EC:SG	0/1:17:61:9:Y	0/1:21:50:15:Y	0:31:120:0:C	0:28:111:0:C	0:33:129:0:C	0:21:90:0:C	0:37:138:0:C	0:9:54:0:C
8209_GGCCGGGTGGGCCTGGGCGGCTCCCCTGGCCGCGG_NODE_2_length_247_cov_12.846154	218	.	A	G	80.25	PASS	NS=8:AN=1:DP=154	GT:DP:GQ:EC:SG	0:14:72:0:A	0/1:13:42:6:R	0/1:34:78:18:R	0:43:162:0:A	0:8:63:0:A	0:9:63:0:A	0:30:123:0:A	0:3:39:0:A
8338_GGCCGTCATGGTCCCGAAACCTTCTGTTGGTCCAG_NODE_2_length_239_cov_7.054393	195	.	C	A,T	31.62	PASS	NS=8:AN=2:DP=101	GT:DP:GQ:EC:SG	0:5:42:0:C	0/2:12:25:2:C	0/1:29:47:9:M	0/1/2:25:15:5,3:M	0:5:42:0:C	0:7:48:0:C	0/2:11:29:4:Y	0/2:7:5:2:Y
6168_GGCCGCGCTGGGACCCACAGGAAGGTGGGGCGATG_NODE_3_length_156_cov_3.243590	68	.	C	A	18.29	PASS	NS=7:AN=1:DP=41	GT:DP:GQ:EC:SG	1:2:3:2:A	1:17:48:17:A	1:15:42:15:A	0/1:4:20:3:M	1:1:7:1:C	1:1:3:1:C	1:1:5:1:C	.:0:0:0:.
5427_GGCCGGCAGCTGCCGCCCACAGCACCTGCTCCAAA_NODE_2_length_337_cov_11.501484	15	.	C	T	6.5	q10	NS=6:AN=1:DP=9	GT:DP:GQ:EC:SG	.:0:0:0:.	1:3:6:3:T	1:2:3:2:T	0:1:30:0:C	1:1:0:1:C	1:1:0:1:Y	1:1:0:1:Y	.:0:0:0:.
9615_GGCCGGGAGGGCTGGACACGTGGGCTCTGCTGTGG_NODE_2_length_303_cov_18.914192	45	.	C	T	44.62	PASS	NS=8:AN=1:DP=114	GT:DP:GQ:EC:SG	0/1:6:19:1:C	1:37:108:37:T	0/1:17:39:6:Y	0:22:93:0:C	1:9:24:9:T	1:3:6:3:T	0/1:19:67:9:Y	1:1:1:1:C
4933_GGCCGGGGCCTCGAATGCCCAGCGGCGGGCAGCGG_NODE_2_length_283_cov_9.717315	93	.	A	G	74.88	PASS	NS=8:AN=1:DP=219:AS=GAGGGAGGCTGAGAAAGCACTTCTACACTTGCAAGTGAGTCAGATGAGCC[A/G]TTGGTACGGTTGGTTCCATGGTGTAATGGTGAGCACTCTGGACTCTGAAT	GT:DP:GQ:EC:SG	0/1:14:85:8:R	1:109:175:109:G	0/1:34:74:12:R	0:17:78:0:A	0/1:8:25:3:R	0:11:60:0:A	1:23:66:23:G	0:3:36:0:A
2417_GGCCGGGTGTTCGCTCCGCCGCCTGTCCGCGCACC_NODE_2_length_260_cov_11.619231	191	.	C	T	73.88	PASS	NS=8:AN=1:DP=201:AS=GTGGAGAGGATCCAAATGCGAAACCGAACTCCTCAGGGAAGAGAGTCCTG[C/T]CAACCGCAGCATATGTAAACTTAACTTTGCTACTACAAAAATCCAGCGTC	GT:DP:GQ:EC:SG	0/1:8:13:4:Y	0:3:36:0:C	0/1:8:7:2:C	0:48:151:0:C	0:53:196:0:C	0/1:16:51:10:Y	0/1:54:71:27:Y	0:11:66:0:C
7892_GGCCGTGGCCCAAGTCCTTTACTGTCCATTGGGGA_NODE_2_length_214_cov_13.271028	57	.	G	A	39.38	PASS	NS=8:AN=1:DP=140	GT:DP:GQ:EC:SG	0:6:45:0:G	0/1:28:45:8:R	0/1:17:1:3:R	0:31:107:0:G	0/1:12:57:6:R	0/1:7:29:3:R	0/1:35:23:7:R	0/1:4:8:1:G
7381_GGCCGAGCCGCCACTCTACCCGGAAGTTCCTCCCA_NODE_2_length_298_cov_10.312080	184	.	T	C	60	PASS	NS=8:AN=1:DP=325:AS=AAGCATAACAATTGTGAGGATGGCGCAGGACTGGGCAGTGTTTCGTTCTG[T/C]TGTGCGTAGCGTCGCTATGAGCCCGAACCCACTCCAAGGCATCTAACAAC	GT:DP:GQ:EC:SG	0/1:24:13:5:Y	0/1:27:46:8:Y	0/1:45:90:24:Y	0/1:67:71:24:Y	0:46:171:0:T	0/1:32:4:6:Y	0/1:77:67:28:Y	1:7:18:7:C
6421_GGCCGCACGCAGTCCCCGGGGCCCTCGGGACGACC_NODE_2_length_225_cov_4.977778	124	.	C	T	54.57	PASS	NS=7:AN=1:DP=80:AS=TCTGTATTCTCTTCTTTACAAGCACACTCCGAATTGTGCAACGTTCAGGT[C/T]CCAGAAAGCCTGCATCTGCCTGTGATAAAGGACTCTGATAGAAGGCTCTC	GT:DP:GQ:EC:SG	0:6:45:0:C	.:0:0:0:.	0:3:36:0:C	0:18:81:0:C	0:8:51:0:C	0:17:78:0:C	0/1:19:37:7:Y	0:9:54:0:C
9149_GGCCGCTAACCAAAAGGTTGGCAGTTGGAATCCAC_NODE_2_length_211_cov_10.270143	64	.	T	C	40	PASS	NS=7:AN=1:DP=103	GT:DP:GQ:EC:SG	0/1:6:4:2:T	0:39:93:0:T	0/1:16:48:7:Y	0/1:10:14:3:Y	0/1:8:32:4:Y	.:0:0:0:.	0/1:21:53:9:Y	0:3:36:0:T
10478_GGCCGGAACTGTGCACAGATGCCTTCCTCTTCCGG_NODE_2_length_198_cov_26.030304	95	.	G	A	112.75	PASS	NS=8:AN=1:DP=362:AS=GCATAGTCAATAAAACACAGGTAAACATCCTTCTGGTATTCTCTGCTTTC[G/A]GCCAGGATCCATCTGACATCAGCAATGATATCCCTGGTTCCATGTCCTCT	GT:DP:GQ:EC:SG	0/1:27:1:4:G	0/1:68:71:15:R	0:68:128:0:G	0:54:190:0:G	0:48:175:0:G	0:21:93:0:G	0:57:177:0:G	0:19:67:0:G
5737_GGCCGTGGAGAGAGCAAGAAAGCGGCGACGGCGGC_NODE_2_length_227_cov_16.127754	50	.	G	A	52.12	PASS	NS=8:AN=1:DP=135	GT:DP:GQ:EC:SG	1:6:15:6:A	0/1:37:61:12:R	0:11:60:0:G	0:22:93:0:G	0/1:16:68:8:R	1:10:27:10:A	1:27:78:27:A	1:6:15:6:A
9461_GGCCGCCGCGCTACCCGAGCTAAGGGACAATGGGG_NODE_2_length_313_cov_7.955272	56	.	C	T	21.5	PASS	NS=6:AN=1:DP=47	GT:DP:GQ:EC:SG	.:0:0:0:.	1:24:69:24:T	1:9:30:9:T	1:6:15:6:T	1:3:6:3:T	1:3:6:3:T	1:2:3:2:T	.:0:0:0:.
6268_GGCCGCAACGGGTTCGGTGTTTTTTGGTTTGGGCG_NODE_2_length_300_cov_19.176666	52	.	A	T	30.38	PASS	NS=8:AN=1:DP=56:AS=CCTGCTTCATTGCTAGACACTGTAGACACTGATTTTGTAACACTAAATAT[A/T]TTTTTTTAATTGTCTTAGAAATGCGTTATCTAAAATGCAAGAGAGTTTAT	GT:DP:GQ:EC:SG	0/1:4:20:1:A	0/1:19:42:11:W	1:17:48:17:T	0/1:6:25:1:A	0:1:30:0:A	0:3:36:0:A	1:4:9:4:T	0:2:33:0:A
1_GGCCGAGGGATGGAACTGGGTGCGGATAATCCTTC_NODE_2_length_314_cov_24.678345	21	.	T	A	11.5	PASS	NS=6:AN=1:DP=23	GT:DP:GQ:EC:SG	.:0:0:0:.	1:16:51:16:A	1:2:3:2:A	1:2:3:2:A	.:0:0:0:.	1:1:4:1:T	1:1:4:1:T	1:1:4:1:T
7187_GGCCGCGCAGTGCGCCTGCGCCTCTCGCGAAGGAC_NODE_2_length_270_cov_5.459259	42	.	A	C	17.57	PASS	NS=7:AN=1:DP=48	GT:DP:GQ:EC:SG	1:1:0:1:M	1:14:39:14:C	1:10:27:10:C	1:7:18:7:C	1:7:18:7:C	1:1:0:1:M	1:8:21:8:C	.:0:0:0:.
9025_GGCCGGATAAGTTTGGATCGAGCCTAATGATGCTG_NODE_2_length_222_cov_16.630630	185	.	C	T,G	42.62	PASS	NS=8:AN=2:DP=70	GT:DP:GQ:EC:SG	0/2:18:35:5:S	0:4:39:0:C	0:5:42:0:C	0:2:33:0:C	0/1:5:14:1:C	0:5:42:0:C	0:20:87:0:C	0:11:49:0:C
7287_GGCCGTGGGAGACAGGATGGGAAGGGAAATCAGCG_NODE_1_length_131_cov_56.541985	116	.	T	G	38.14	PASS	NS=7:AN=1:DP=124	GT:DP:GQ:EC:SG	0/1:26:52:20:K	.:0:17:0:T	1:2:3:2:G	0/1:12:51:6:K	0/1:9:31:4:K	0/1:9:37:5:K	0/1:3:12:1:T	0/1:63:81:44:K
3848_GGCCGCCAGGACACCAGGGTCGGGCCCCTGCCGCG_NODE_2_length_191_cov_5.691100	134	.	T	C	69	PASS	NS=8:AN=1:DP=130	GT:DP:GQ:EC:SG	0:10:57:0:T	0:25:102:0:T	0:20:87:0:T	0:19:84:0:T	0:16:78:0:T	0/1:12:24:4:Y	0/1:26:87:14:Y	0:2:33:0:T
4795_GGCCGCTCAGTGACCGTGGCGAGTACCTGTCTCTC_NODE_2_length_276_cov_5.333333	158	.	G	C	81.38	PASS	NS=8:AN=1:DP=247:AS=GAACCTCCTTTGTCAGTTCTGCGCACGGTCTGGCAGCGCCTTGGACGCCG[G/C]ACCTGTTGGATCCACGTCCGGTTACACAATGGCCATGGGTATGCGGGTAG	GT:DP:GQ:EC:SG	1:16:45:16:C	1:39:117:39:C	1:66:130:66:C	1:42:119:42:C	1:27:78:27:C	1:17:48:17:C	1:36:105:36:C	1:4:9:4:C
6636_GGCCGTGTTATCTATTTTGGTCAAAGGCACTGTCA_NODE_2_length_144_cov_5.958333	122	.	A	C	34.88	PASS	NS=8:AN=1:DP=30	GT:DP:GQ:EC:SG	1:3:6:3:C	0:3:36:0:A	0:7:48:0:A	0:7:48:0:A	0:4:39:0:A	0:1:33:0:A	0:3:36:0:A	0:2:33:0:A
3950_GGCCGGACCTTCCTCCCGTAGAAGCCGCTCGGCCC_NODE_2_length_227_cov_11.660793	98	.	A	C	18	PASS	NS=7:AN=1:DP=27:AS=GTCAGCAGAACAATTCGAAGCTGGGGCCGGAGTGTCGGTGATCCAAACGA[A/C]GAGAGGGTTTTTACTCTGGAGAAAGGCCACAAATGCTCTACCGGCTTTTA	GT:DP:GQ:EC:SG	0/1:3:10:1:A	1:1:10:1:A	1:4:9:4:C	0:5:45:0:A	0/1:6:22:1:A	0/1:6:27:1:A	1:2:3:2:C	.:0:0:0:.
5752_GGCCGCTTAACCCTTCGCTCCCCGACACGCGCCGT_NODE_2_length_206_cov_7.131068	22	.	A	G	38.29	PASS	NS=7:AN=1:DP=58	GT:DP:GQ:EC:SG	0/1:7:15:1:A	0/1:14:61:7:R	0/1:25:98:16:R	0:4:39:0:A	0/1:4:11:2:R	0:1:30:0:A	0/1:3:14:1:A	.:0:0:0:.
3848_GGCCGCCAGGACACCAGGGTCGGGCCCCTGCCGCG_NODE_2_length_191_cov_5.691100	89	.	T	C	58.5	PASS	NS=8:AN=1:DP=107	GT:DP:GQ:EC:SG	0:11:60:0:T	0:24:99:0:T	0:30:117:0:T	0:15:72:0:T	0:6:45:0:T	0/1:9:4:2:T	0/1:10:38:5:Y	0:2:33:0:T
6614_GGCCGGTGCTCATTCACGAAGGGACCGTCACTGAC_NODE_2_length_289_cov_9.176471	114	.	T	A	34.88	PASS	NS=8:AN=1:DP=95:AS=TAGCCCAAAGCAGGCCGGGATCGCTCCGCGCTAGCGGCTACCGTCCGTTT[T/A]CAGAAAGCAACGCTCCCTCTTGCCGTTTTCCTCCCTTTTGTCGAAACTAA	GT:DP:GQ:EC:SG	1:5:12:5:A	1:16:45:16:A	1:14:42:14:A	1:17:51:17:A	1:12:36:12:A	1:7:21:7:A	1:23:66:23:A	1:1:6:1:T
5100_GGCCGACCATCAGCATGGAGCATATCAGTGCCTTC_NODE_2_length_325_cov_23.843077	83	.	G	C	70	PASS	NS=8:AN=1:DP=155	GT:DP:GQ:EC:SG	0/1:5:20:4:S	1:34:105:34:C	0/1:33:77:14:S	0:24:102:0:G	0/1:20:65:10:S	0/1:10:50:5:S	0:25:102:0:G	0:4:39:0:G
4962_GGCCGAGTGCCATGGGCAGAAACATTGACACATAC_NODE_3_length_173_cov_4.890173	33	.	C	G	60.67	PASS	NS=6:AN=1:DP=191	GT:DP:GQ:EC:SG	.:0:0:0:.	0/1:81:109:37:S	0/1:58:112:31:S	0/1:12:4:2:C	0/1:14:7:2:C	0/1:10:58:5:S	0/1:16:74:7:S	.:0:0:0:.
2000_GGCCGTGTATTACTGTGCGAAAGACACAGTGAGGG_NODE_5_length_210_cov_20.195238	171	.	G	C	78.12	PASS	NS=8:AN=1:DP=147	GT:DP:GQ:EC:SG	0/1:8:48:4:S	0:8:54:0:G	0:11:60:0:G	0:29:117:0:G	0:38:141:0:G	0/1:15:37:6:S	0:13:66:0:G	0:25:102:0:G
1187_GGCCGCCAGCGGGTGGCGCTCTTGCCGCACGAAAG_NODE_2_length_304_cov_12.092105	56	.	T	C	46.75	PASS	NS=8:AN=1:DP=78:AS=GCTATTCAGTTGTGCACTTTAAGTGGGTAAATTGTATGGTGTGAGAGTTA[T/C]ATCTCAATAAAGCTGTTACGAACATTCACAGCAAACGGTTTGCAGACCAG	GT:DP:GQ:EC:SG	1:1:0:1:C	0:25:102:0:T	0:24:99:0:T	0:8:51:0:T	0/1:10:27:3:Y	0/1:3:20:2:Y	0:6:45:0:T	0:1:30:0:T
230_GGCCGGTCCCGGGCCCTCCTCCCTCTGTGCCAGGC_NODE_2_length_264_cov_9.530303	209	.	C	A	130.62	PASS	NS=8:AN=1:DP=336:AS=TTTCTCCCCAGCCCAGCGCCCTACTCCCGTCTTCCCTCTCGCAGTCTAAA[C/A]GTTATTCCATCCACCGGAGGTGACTGTCCTGCCAATCCCGCAGTCCCTCG	GT:DP:GQ:EC:SG	0:30:120:0:C	0:36:138:0:C	0:61:191:0:C	0:76:204:0:C	0:34:132:0:C	0:36:141:0:C	0/1:54:65:30:M	0:9:54:0:C
3522_GGCCGCTTTCCCAGGAGGTGTCTCCGCTTTTCTCC_NODE_2_length_292_cov_18.034246	183	.	C	T	149	PASS	NS=8:AN=1:DP=354:AS=AGACTACATCAGCCTGAGACCAGAAGAGCTAGATGGTGCCTGGCTACAAC[C/T]GATGACTGCCCTGACAGGGAACACAACAGAGAACCCCTGAGGGAGGAGGA	GT:DP:GQ:EC:SG	0:30:120:0:C	0:52:187:0:C	0:76:209:0:C	0:51:181:0:C	0:46:175:0:C	0:23:96:0:C	0:58:201:0:C	0/1:18:23:6:Y
10167_GGCCGGTGGAAGCTCACGGCGGGGCTCAGCGGCTG_NODE_2_length_232_cov_7.741379	9	.	G	T	3.5	q10	NS=6:AN=1:DP=12	GT:DP:GQ:EC:SG	1:1:3:1:G	1:3:6:3:T	1:2:3:2:T	1:3:6:3:T	1:2:1:2:T	1:1:2:1:G	.:0:0:0:.	.:0:0:0:.
602_GGCCGGGGGGTGACAGACTTGTTCCTGCTGGGCTC_NODE_2_length_179_cov_6.737430	66	.	C	T	61.62	PASS	NS=8:AN=1:DP=118	GT:DP:GQ:EC:SG	0:11:60:0:C	0:28:51:0:C	0:27:108:0:C	0:17:78:0:C	0/1:9:37:4:Y	0:9:54:0:C	0:14:69:0:C	0:3:36:0:C
7031_GGCCGGGTCGCGCTGGATCAGACTGGACCGGTACC_NODE_5_length_171_cov_20.368422	40	.	T	C	120.88	PASS	NS=8:AN=1:DP=263	GT:DP:GQ:EC:SG	0/1:26:92:12:Y	0:10:57:0:T	0:54:190:0:T	0:57:199:0:T	0:55:193:0:T	0:17:78:0:T	0:39:144:0:T	0/1:5:14:2:Y
5480_GGCCGCTTTCCCAAGCCCTTCCAGCTCAAACTATG_NODE_2_length_286_cov_7.506993	259	.	G	A	75.14	PASS	NS=7:AN=1:DP=206	GT:DP:GQ:EC:SG	0/1:53:41:6:G	0:34:129:0:G	.:0:0:0:.	0:22:93:0:G	0:29:114:0:G	0:7:48:0:G	0:9:54:0:G	0/1:52:47:15:R
10062_GGCCGCCTCCTGGGTCTCCTTTGTTCACGTCTTTC_NODE_2_length_350_cov_8.494286	121	.	T	C	39.12	PASS	NS=8:AN=1:DP=107	GT:DP:GQ:EC:SG	0:3:36:0:T	0/1:21:59:11:Y	0/1:28:50:11:Y	0/1:27:68:15:Y	1:11:30:11:C	0/1:5:28:3:Y	1:11:36:11:C	1:1:6:1:T
8352_GGCCGTCCGTTCCAGGCTGAGATTCCAGAGAATAG_NODE_2_length_251_cov_13.944223	18	.	A	T	9.71	q10	NS=7:AN=1:DP=28	GT:DP:GQ:EC:SG	1:1:2:1:A	1:11:30:11:T	1:2:3:2:T	1:3:6:3:T	1:2:3:2:T	1:5:12:5:T	1:4:12:4:T	.:0:0:0:.
167_GGCCGCGGACGGCAAGGAGGCGGGCCCGGAGCCTG_NODE_1_length_396_cov_35.785355	333	.	G	C	115.25	PASS	NS=8:AN=1:DP=9365:AS=ACTCCAGGCGTATCGTTTTCAAACTAACCTACGTCTGCTGGAACGCATCG[G/C]CGACGTTTCTGGACAGTCGTTTTGGTGTGCCCCTCTGACAGTGTCACCCG	GT:DP:GQ:EC:SG	0/1:1226:20:376:S	0/1:584:208:57:G	0/1:1357:191:240:G	0/1:2016:128:417:G	0/1:1546:147:357:G	0/1:907:32:293:G	0/1:1322:126:355:G	0/1:407:70:103:G
5945_GGCCGAGTGCTACGAGCAGCTAGGCCAGCTGCATC_NODE_2_length_247_cov_22.327936	35	.	G	A	25.62	PASS	NS=8:AN=1:DP=192	GT:DP:GQ:EC:SG	0/1:14:23:2:G	0/1:45:34:22:R	0/1:37:11:9:R	0/1:36:3:8:G	0/1:6:19:4:R	0/1:13:31:2:G	0/1:37:45:16:R	0:4:39:0:G
9731_GGCCGTCCGCGGTCTTGGGTCTCATTCCAGCCCCT_NODE_2_length_165_cov_13.666667	142	.	C	T	28.86	PASS	NS=7:AN=1:DP=57	GT:DP:GQ:EC:SG	0/1:6:44:4:Y	0/1:10:4:9:Y	0/1:19:55:7:Y	0:1:30:0:C	0/1:9:24:1:C	0/1:5:5:2:C	0/1:7:40:4:Y	.:0:0:0:.
8492_GGCCGTGACCTAGGGTCACGACCTTGCTTGTATGC_NODE_2_length_307_cov_26.413681	123	.	A	G	39.75	PASS	NS=8:AN=1:DP=830	GT:DP:GQ:EC:SG	0/1:56:57:29:R	0/1:184:15:134:R	0/1:148:24:105:R	0/1:124:5:96:R	0/1:109:48:74:R	0/1:43:58:28:R	0/1:126:55:80:R	0/1:40:56:28:R
6777_GGCCGGGGCCTTTCAGGAGCAGATTACCACGCCTT_NODE_2_length_320_cov_12.418750	50	.	A	C	22.83	PASS	NS=6:AN=1:DP=49	GT:DP:GQ:EC:SG	.:0:0:0:.	1:19:54:19:C	1:14:42:14:C	.:0:16:0:A	1:4:9:4:C	1:3:6:3:C	1:8:21:8:C	1:1:5:1:A
3822_GGCCGCGTAGGTGGGCCGGACCTGTATCTCTCGTG_NODE_2_length_329_cov_25.978724	63	.	A	G	43.25	PASS	NS=8:AN=1:DP=93	GT:DP:GQ:EC:SG	0:4:39:0:A	0/1:38:97:16:R	1:11:30:11:G	0:16:75:0:A	0/1:7:3:2:R	0:5:42:0:A	1:11:30:11:G	0:1:30:0:A
4605_GGCCGCCAAGGGGCCTCCGCAGAGAGAGAACCAGT_NODE_2_length_341_cov_20.164223	69	.	A	C	25	PASS	NS=7:AN=1:DP=67:AS=GGGAAACCCAGAGCCCAAGGAGAGAATGATTTATAATCTGGACTGTAGGA[A/C]ACTAGTCAGCTACTTTGGCAGCAGTGGCCTAGCTATGAAAGTTGAGCTCT	GT:DP:GQ:EC:SG	1:1:3:1:A	1:29:84:29:C	1:11:30:11:C	0/1:5:6:2:M	0/1:5:10:4:M	1:2:3:2:C	1:14:39:14:C	.:0:0:0:.
5416_GGCCGAAGGGAACCTGCCCCGAACTGGGGGGAAGG_NODE_2_length_271_cov_7.361624	29	.	G	C	14.14	PASS	NS=7:AN=1:DP=40	GT:DP:GQ:EC:SG	1:3:6:3:C	1:13:36:13:C	1:10:27:10:C	1:4:9:4:C	1:3:6:3:C	1:3:6:3:C	1:4:9:4:C	.:0:0:0:.
5640_GGCCGCTCAGATCACCCGGCACAAGTGGGAGGCTG_NODE_2_length_297_cov_11.616161	153	.	A	G	46	PASS	NS=8:AN=1:DP=95	GT:DP:GQ:EC:SG	0/1:3:9:1:A	0:29:114:0:A	0/1:23:7:4:A	0:16:81:0:A	0/1:10:31:4:R	0:7:48:0:A	0:5:45:0:A	0:2:33:0:A
1827_GGCCGCGTGCGTGGCGTTGGCAGTGAAGGGGTAGG_NODE_3_length_166_cov_26.897591	153	.	T	C	56	PASS	NS=6:AN=1:DP=67	GT:DP:GQ:EC:SG	0/1:16:48:7:Y	.:0:0:0:.	.:0:0:0:.	0:9:54:0:T	0:21:90:0:T	0:6:45:0:T	0:8:51:0:T	0:7:48:0:T
7150_GGCCGGGCTGGTCCAGGAAGTCCCTCCGACCACCG_NODE_2_length_318_cov_5.424528	291	.	C	T	18.12	PASS	NS=8:AN=1:DP=120	GT:DP:GQ:EC:SG	0/1:12:40:6:Y	0/1:5:4:1:C	0/1:9:4:3:Y	0/1:38:41:16:Y	0/1:24:0:6:C	0/1:16:19:8:Y	0/1:9:24:6:Y	0/1:7:13:3:Y
9095_GGCCGACTGCGCAGCAGCGCCGCGCTCTGGATTTC_NODE_2_length_253_cov_31.577076	11	.	G	A	17.83	PASS	NS=6:AN=1:DP=26	GT:DP:GQ:EC:SG	1:3:6:3:A	1:4:9:4:A	1:3:6:3:A	0:6:45:0:G	.:0:0:0:N	0/1:4:23:3:R	1:6:18:6:A	.:0:0:0:.
9929_GGCCGCCGGGCAGCCCCCGCCCGCGCCCAGCTGGA_NODE_2_length_213_cov_10.605634	122	.	C	T	52	PASS	NS=8:AN=1:DP=87:AS=CTGCCCCATAGGGTTTCCAAGGCTGTAATCTTTATGGCAGTCACAGACTG[C/T]CACATCTTTCTCCCAAGAAGCAGCTGGTAGGTTCAAATCTCCAACCTTTT	GT:DP:GQ:EC:SG	0:5:42:0:C	1:3:6:3:T	0:23:96:0:C	0/1:10:38:1:C	0:20:75:0:C	0:10:57:0:C	0:15:72:0:C	0:1:30:0:C
8502_GGCCGGGGCTTCTCAGTGTCCAGGGGTCGCGCGTT_NODE_2_length_353_cov_11.793201	266	.	T	C	102	PASS	NS=8:AN=1:DP=330:AS=TCTGTACGATTTTCTTGGCTGTAACCTTAACTAACAGAAGCAGGCTGAGT[T/C]TCAGCCATCAGATGAGTTAAATGCATGTGCGGGCGTTTTGAAGGCCCCGG	GT:DP:GQ:EC:SG	0:19:84:0:T	0/1:26:59:10:Y	0:34:129:0:T	0:73:217:0:T	1:75:122:75:C	0:17:78:0:T	0/1:77:79:39:Y	0/1:9:48:5:Y
8662_GGCCGTGCGGGACGCCTTCCTGAGCTTCTTCCGGG_NODE_2_length_328_cov_7.783536	144	.	T	G	61.75	PASS	NS=8:AN=1:DP=181:AS=CTTAAAGAACTGCTTAGCATATAGTGAGCGCTCCATAAACACTTGTTAAT[T/G]AATGAGTTTATAAATAATGAGTAAATGAAGCCAGGGTTCCCCACCAGTCT	GT:DP:GQ:EC:SG	0/1:16:69:9:K	0/1:58:54:18:K	0:31:120:0:T	0/1:29:91:16:K	0:18:81:0:T	1:8:21:8:G	1:20:57:20:G	1:1:1:1:T
6711_GGCCGCAAAAAAGAGGAACTCTCAACAAGAAGGAC_NODE_2_length_255_cov_8.513725	65	.	C	T	8.12	q10	NS=8:AN=1:DP=31:AS=CTTTACATAATGACTTCAATGATTCCCTGTTTTGAGCGATTTTTTTCTTT[C/T]TAAAATTAATCTTAATTTGTTTTTGTGATTTCCTTATTTGAATTGATATC	GT:DP:GQ:EC:SG	1:2:3:2:T	1:7:18:7:T	1:2:3:2:T	0/1:7:14:6:Y	1:2:3:2:T	1:4:9:4:T	1:5:12:5:T	1:2:3:2:T
2628_GGCCGGGCGGGAGGAGTGAGCTGGCGGGCGGAACG_NODE_2_length_269_cov_20.052044	185	.	T	A	138	PASS	NS=8:AN=1:DP=332	GT:DP:GQ:EC:SG	0/1:24:39:10:W	0:40:147:0:T	0:57:199:0:T	0:84:230:0:T	0:46:165:0:T	0:20:87:0:T	0:42:153:0:T	0:19:84:0:T
4877_GGCCGTATCCTCCCCCGGCAGACAGCCCACCCCGG_NODE_2_length_245_cov_10.322449	116	.	C	T	57.38	PASS	NS=8:AN=1:DP=171	GT:DP:GQ:EC:SG	0/1:15:37:7:Y	1:24:69:24:T	1:49:89:49:T	0:27:108:0:C	1:22:63:22:T	1:2:3:2:T	1:30:87:30:T	1:2:3:2:T
8793_GGCCGCTTCGCGGTGCAGCGGCTTCACCTGGAGCG_NODE_2_length_302_cov_21.705297	124	.	A	G	102.38	PASS	NS=8:AN=1:DP=633:AS=AAAGCAATATATGCGTTCACGTGGCAATAAAGGACAAATTAAACGCCAAA[A/G]TGCATTAACCCACCACTGCCACATTTCGTCTCATTGTAATCCAAGACTAA	GT:DP:GQ:EC:SG	0/1:65:35:21:R	0:141:255:0:A	0/1:94:61:42:R	0:64:211:0:A	0/1:134:15:43:R	0:28:114:0:A	0/1:87:41:31:R	0:20:87:0:A
7419_GGCCGGGTGTTTGCATAGAACGTTATCCGCTGAAT_NODE_2_length_176_cov_9.522727	61	.	G	C	67	PASS	NS=8:AN=1:DP=573	GT:DP:GQ:EC:SG	0:22:60:0:G	0:164:205:0:G	0/1:119:32:22:G	0/1:73:5:12:G	0/1:68:21:10:G	0:17:78:0:G	0/1:92:110:8:G	0/1:18:25:4:S
1762_GGCCGCACTCTTTCTGACTACAACATCCAGAAGGA_NODE_1_length_173_cov_8.208093	61	.	C	T	36.29	PASS	NS=7:AN=1:DP=41	GT:DP:GQ:EC:SG	.:0:0:0:.	0:5:42:0:C	0:2:33:0:C	0:18:81:0:C	1:5:12:5:T	0:4:39:0:C	0:5:42:0:C	0/1:2:5:1:C
3446_GGCCGTCCCCGCCGCGCCCAGAGTCCGGTTGGACG_NODE_2_length_186_cov_6.661290	10	.	T	C	28.67	PASS	NS=6:AN=1:DP=21	GT:DP:GQ:EC:SG	0:2:33:0:T	0:5:42:0:T	1:9:24:9:C	0:3:36:0:T	0:1:30:0:T	1:1:7:1:T	.:0:0:0:.	.:0:0:0:.
3104_GGCCGGGGAGCCGGAGAGGCCAAGTACAAAGCGCC_NODE_2_length_294_cov_17.064627	73	.	T	C	48.12	PASS	NS=8:AN=1:DP=163:AS=GTAAGGGAAACGCCAACAACGCCCTCTCCAGGCGAAGTAGGCCCCTCTCC[T/C]CTTCTCTCTGTCATGAAAGCCAAAATTAAAAAACAACGAACGGGAAGCCG	GT:DP:GQ:EC:SG	1:4:9:4:C	0/1:38:68:20:Y	0/1:43:70:22:Y	0/1:30:73:17:Y	0:21:90:0:T	1:6:15:6:C	1:20:57:20:C	1:1:3:1:T
8935_GGCCGCGCGGCTCGTCGCCTTGACGACAGAGACAA_NODE_2_length_191_cov_8.068063	19	.	C	T	21	PASS	NS=7:AN=1:DP=61	GT:DP:GQ:EC:SG	0/1:2:9:1:C	0/1:12:43:1:C	0/1:23:50:9:Y	0/1:10:10:2:C	0/1:7:10:6:Y	0/1:2:6:1:C	0/1:5:19:4:Y	.:0:0:0:.
10572_GGCCGACTCCAGCCCTGGCCTCAAGTGACGCGGCG_NODE_2_length_183_cov_22.202187	11	.	T	C	17.14	PASS	NS=7:AN=1:DP=47	GT:DP:GQ:EC:SG	1:2:3:2:C	1:5:12:5:C	1:11:30:11:C	1:21:60:21:C	.:0:0:0:N	1:2:3:2:C	1:4:9:4:C	1:2:3:2:C
145_GGCCGCGCCCCAGGCCACTTGGCTGTGTCCGGTGT_NODE_1_length_290_cov_15.462069	17	.	T	G	38.5	PASS	NS=6:AN=1:DP=27	GT:DP:GQ:EC:SG	.:0:0:0:.	0/1:8:39:5:K	0:8:51:0:T	0:3:36:0:T	0:2:33:0:T	0:1:30:0:T	0:5:42:0:T	.:0:0:0:.
2162_GGCCGCCCAGCGTCCGACACCAGAGCGTTGCTGCT_NODE_2_length_289_cov_5.782007	169	.	C	A	49.38	PASS	NS=8:AN=1:DP=108:AS=TGATTGTCCTCCAAGATTTACATTTCTATCAAGTTTCCAGGTGATGGTGA[C/A]AAGCACATAAGAAATACCGCAGTGGGTATAGAAGAAAATAAGGCCTCCTG	GT:DP:GQ:EC:SG	0:10:57:0:C	0/1:6:19:3:M	0:20:87:0:C	0:31:123:0:C	0:11:60:0:C	1:5:12:5:A	0/1:22:27:6:M	0/1:3:10:1:C
9948_GGCCGGGTCGTGAGGACACCCGAGGGGGCAGGAGA_NODE_2_length_315_cov_23.863493	44	.	A	G	40.38	PASS	NS=8:AN=1:DP=105	GT:DP:GQ:EC:SG	1:5:12:5:G	0:19:51:0:A	0:27:108:0:A	0/1:24:6:4:A	0:6:45:0:A	0:6:45:0:A	0:14:38:0:A	0/1:4:18:2:R
977_GGCCGTCACCACTGGCAGTTCTCACAGCTCAGTGC_NODE_3_length_225_cov_24.804445	126	.	C	G	79.5	PASS	NS=8:AN=1:DP=249	GT:DP:GQ:EC:SG	1:13:36:13:G	0/1:48:111:23:S	1:71:160:71:G	0/1:53:102:22:S	0:21:90:0:C	0/1:9:22:3:S	0/1:27:97:14:S	1:7:18:7:G
5231_GGCCGGGGGGGGCGGTGTCAATATGCCCCGGAACC_NODE_2_length_282_cov_7.365248	211	.	G	C	70.5	PASS	NS=8:AN=1:DP=147:AS=TGGAGGTAAAAGTTTGAATTTATGGGAAGTGTCGGCCACATAAAAAGGCA[G/C]ACCTCACTGTCAAAATCCCCTATAGCGGTCTTCAATTCAAGCAGTCAGCC	GT:DP:GQ:EC:SG	1:8:21:8:C	0:11:60:0:G	0/1:35:98:20:S	0:43:127:0:G	0:8:51:0:G	0:10:57:0:G	0:29:114:0:G	0:3:36:0:G
7618_GGCCGGGAGGCGCGGGATGGGCGCGCTGCATGAGG_NODE_2_length_310_cov_23.896774	50	.	T	G	76	PASS	NS=8:AN=1:DP=146	GT:DP:GQ:EC:SG	0:2:33:0:T	0:39:144:0:T	0:41:150:0:T	0:18:81:0:T	0/1:19:68:8:K	0:7:48:0:T	0:19:84:0:T	1:1:0:1:G
636_GGCCGCTTTCCTTCAGCCGCCTTCTCCGAGAGCCC_NODE_4_length_159_cov_27.364780	75	.	A	G	57	PASS	NS=8:AN=1:DP=576	GT:DP:GQ:EC:SG	0/1:74:78:42:R	0/1:58:61:23:R	0/1:67:29:18:R	0/1:114:78:55:R	0/1:104:74:49:R	0/1:40:37:12:R	0/1:106:51:40:R	0/1:13:48:7:R
599_GGCCGTTTTCGTGAAGAATCTGCGCGTTGTTCCAG_NODE_2_length_282_cov_17.716312	106	.	A	C	87.38	PASS	NS=8:AN=1:DP=260:AS=CATTTTTTCCAACAAGTGCTATTGTCTCTCTTTCACACACACGATATATT[A/C]AAAGTCAACAAAAAAAAAGACGCTGTAACGTCACTCTTGAAAACAAGGGC	GT:DP:GQ:EC:SG	0/1:19:64:10:M	0:45:162:0:A	0/1:69:69:36:M	0:47:168:0:A	0:22:93:0:A	0:10:57:0:A	0/1:42:67:19:M	0/1:6:19:5:M
7614_GGCCGCAGCGTCTCCTTGAATTTCCTTTTGGCCAC_NODE_2_length_265_cov_11.230188	200	.	T	C	96.12	PASS	NS=8:AN=1:DP=244:AS=CCGCCCTGCAGAAAGAAACCAGTGCCAGTCACACTGCTCTCTCAGGCTAT[T/C]GGGACAGATAAAGGCACACAAAAAATACCAGTAGGAGCACTGGGGACAGG	GT:DP:GQ:EC:SG	0/1:6:46:4:Y	1:12:36:12:C	0/1:40:87:19:Y	0:41:150:0:T	1:46:125:46:C	1:27:78:27:C	0:50:184:0:T	1:22:63:22:C
8338_GGCCGTCATGGTCCCGAAACCTTCTGTTGGTCCAG_NODE_2_length_239_cov_7.054393	188	.	G	A	40.62	PASS	NS=8:AN=1:DP=133	GT:DP:GQ:EC:SG	0:5:42:0:G	0/1:15:47:12:R	0/1:39:62:13:R	0/1:36:82:15:R	0/1:9:0:2:R	0/1:8:33:3:R	0:14:42:0:G	0/1:7:17:1:G
9838_GGCCGCCGCCTCCACAGACACTAACACTCCAGGGT_NODE_2_length_255_cov_7.447059	211	.	C	T	47.5	PASS	NS=8:AN=1:DP=140	GT:DP:GQ:EC:SG	0:22:96:0:C	1:5:12:5:T	0/1:20:44:11:Y	0:40:147:0:C	0/1:20:4:5:Y	0/1:14:48:8:Y	0/1:18:17:6:Y	1:1:12:1:C
6689_GGCCGCCCTGCCGCTGGAGCCCCGCTCGGTTCAAG_NODE_2_length_283_cov_14.805654	91	.	A	G	71.38	PASS	NS=8:AN=1:DP=203:AS=AGGAGCCTGTGCATTCCCTGGGTGTATGGAGCAGAGGTATCCACGCAGGT[A/G]TGTGAGGGCATGTGTGGATGTCTGTGTAAATGATGTGAACAGGTAATCAT	GT:DP:GQ:EC:SG	1:14:39:14:G	1:54:142:54:G	1:49:141:49:G	1:30:90:30:G	1:17:51:17:G	1:12:33:12:G	1:25:72:25:G	1:2:3:2:G
5918_GGCCGGGCCAGGTCTCTCTGCTTTAGGGAAAGAGC_NODE_2_length_287_cov_5.282230	204	.	C	T	51.62	PASS	NS=8:AN=1:DP=68	GT:DP:GQ:EC:SG	0:5:42:0:C	0/1:16:68:6:Y	0:13:66:0:C	0:9:54:0:C	0:9:54:0:C	0:3:36:0:C	0:12:63:0:C	0:1:30:0:C
11170_GGCCGTTGGAGCTGGCCAATGGGCGCCGGGGGCAG_NODE_2_length_341_cov_24.791788	29	.	T	G	38.17	PASS	NS=6:AN=1:DP=60	GT:DP:GQ:EC:SG	.:0:0:0:.	0/1:23:75:12:K	0/1:21:68:10:K	0:4:39:0:T	0/1:5:16:1:T	1:1:3:1:T	0/1:6:28:4:K	.:0:0:0:.
8377_GGCCGAGCTCATTGCGGGAAAGCGAAAGCAAAGGA_NODE_2_length_216_cov_5.601852	120	.	T	C	31.43	PASS	NS=7:AN=1:DP=49	GT:DP:GQ:EC:SG	0/1:7:34:5:Y	0/1:15:60:6:Y	0:8:51:0:T	0:11:60:0:T	1:2:3:2:C	.:0:0:0:.	1:1:0:1:C	1:5:12:5:C
7826_GGCCGCGAGACCCAGTAAGAGTCACTGAGATTCGC_NODE_2_length_312_cov_9.820513	273	.	T	C	80.5	PASS	NS=8:AN=1:DP=147	GT:DP:GQ:EC:SG	0:21:90:0:T	0:4:39:0:T	0:18:81:0:T	0:34:138:0:T	0/1:13:44:9:Y	0:18:81:0:T	0:20:99:0:T	0/1:19:72:11:Y
1150_GGCCGCCATTTTCTTTCTTTCTTAGCAGTTAGCTG_NODE_2_length_371_cov_8.474394	340	.	C	G	45	PASS	NS=7:AN=1:DP=57	GT:DP:GQ:EC:SG	0:11:63:0:C	.:0:0:0:.	1:5:12:5:G	0:16:75:0:C	0:5:42:0:C	0/1:2:12:1:C	0:12:66:0:C	0:6:45:0:C
2838_GGCCGAGTGTTGCTGTCTCGTGGGATGATTAGAGT_NODE_2_length_327_cov_3.813456	323	.	A	G	4.33	q10	NS=6:AN=1:DP=13	GT:DP:GQ:EC:SG	1:5:12:5:G	1:1:3:1:A	.:0:0:0:.	1:2:3:2:G	1:2:3:2:G	1:1:2:1:A	.:0:0:0:.	1:2:3:2:G
4389_GGCCGGCGCACGGGACTGCTTCCTCCGGGACAGGA_NODE_2_length_298_cov_8.375839	41	.	A	C	25.5	PASS	NS=6:AN=1:DP=57	GT:DP:GQ:EC:SG	1:2:3:2:C	1:25:72:25:C	1:18:51:18:C	1:5:12:5:C	1:3:6:3:C	.:0:0:0:.	1:4:9:4:C	.:0:0:0:.
1248_GGCCGCTATTTGCATACGGCTTATTTGCATGGAAC_NODE_2_length_237_cov_6.059072	51	.	C	G	55.5	PASS	NS=8:AN=1:DP=154	GT:DP:GQ:EC:SG	1:11:30:11:G	0/1:14:21:5:S	1:27:62:26:G	0:39:144:0:C	1:24:69:24:G	1:16:45:16:G	0/1:20:64:11:S	0/1:3:9:2:S
5416_GGCCGAAGGGAACCTGCCCCGAACTGGGGGGAAGG_NODE_2_length_271_cov_7.361624	251	.	A	G	15.75	PASS	NS=8:AN=1:DP=44	GT:DP:GQ:EC:SG	1:13:39:13:G	1:1:12:1:A	1:7:18:7:G	1:4:9:4:G	1:4:9:4:G	1:6:18:6:G	1:5:12:5:G	1:4:9:4:G
1404_GGCCGCCTGGGTGTAAGGGTTCCAAGGACGGCCTG_NODE_2_length_180_cov_7.605556	18	.	A	C	6.86	q10	NS=7:AN=1:DP=20	GT:DP:GQ:EC:SG	.:0:0:0:N	1:7:18:7:C	1:4:12:4:C	1:2:3:2:C	1:2:3:2:C	1:2:3:2:C	1:2:3:2:C	1:1:6:1:A
3093_GGCCGGCACAAAGCCAGTGGGTCTGCTCTCTGTAC_NODE_2_length_291_cov_9.941581	122	.	A	G	38.25	PASS	NS=8:AN=1:DP=110:AS=TAAACCAGGCTCCCATGACCCCGCAGATGAGAACTGACTGATAAACCCAC[A/G]TGTGCCCCTCTCGCAGCCTGCAAATGTTTGGGAAGGAGATGTCTGAAAAC	GT:DP:GQ:EC:SG	1:4:9:4:G	1:24:72:24:G	1:23:66:23:G	0/1:7:15:6:R	1:21:60:21:G	1:5:12:5:G	1:17:48:17:G	1:9:24:9:G
9563_GGCCGGGATCAGTCGCTGCCCCTGCATCTTGACCC_NODE_5_length_186_cov_14.102151	118	.	T	C	66.25	PASS	NS=8:AN=1:DP=197:AS=AAACTTCCTTCAACCAGAAACATAACTTGGATTTCTATTTCAAATCCTCC[T/C]AGAGAGTAAATCACCTAAACGGCCTATCCTGGGCTGCATTCAGACTTTCG	GT:DP:GQ:EC:SG	0:11:60:0:T	0/1:38:82:23:Y	1:47:111:47:C	0/1:37:46:12:Y	0/1:29:75:16:Y	0:7:48:0:T	0:23:96:0:T	1:5:12:5:C
5480_GGCCGCTTTCCCAAGCCCTTCCAGCTCAAACTATG_NODE_2_length_286_cov_7.506993	187	.	G	A	56.5	PASS	NS=8:AN=1:DP=319	GT:DP:GQ:EC:SG	0/1:68:113:41:R	0/1:96:164:41:R	0/1:12:35:5:R	0/1:37:29:6:G	0/1:34:13:7:R	0/1:11:1:3:R	0/1:25:36:3:G	0/1:36:61:24:R
9147_GGCCGCAGCTCCTCGACCTCACCTTCTGCTGCCGT_NODE_2_length_212_cov_13.283019	160	.	A	G	110.62	PASS	NS=8:AN=1:DP=314	GT:DP:GQ:EC:SG	0:21:90:0:A	0/1:20:73:13:R	0/1:53:85:33:R	0:75:207:0:A	0:71:191:0:A	0/1:21:44:7:R	0:39:144:0:A	0/1:14:51:9:R
97_GGCCGCTCCGGATTTCCTGGCCCCCCTCGCTTGGC_NODE_2_length_285_cov_11.129825	67	.	C	G	43.25	PASS	NS=8:AN=1:DP=137:AS=TAGACCATCCCAGCCTTAGAGACAAGAGATAGGGTGGCTTCGCTGCTCAT[C/G]TCATCCCTGTGCCCCTGCCCTGTGCTGGGCAGGGGTTGAGCCCCAGGGAT	GT:DP:GQ:EC:SG	1:8:21:8:G	1:36:108:36:G	1:32:70:31:G	1:15:21:14:G	1:23:66:23:G	1:9:24:9:G	1:13:36:13:G	1:1:0:1:C
8370_GGCCGCTTGAAGGATGGGGAGGGCGGGGCGGCGAA_NODE_2_length_296_cov_4.030406	131	.	C	G	14.17	PASS	NS=6:AN=1:DP=21	GT:DP:GQ:EC:SG	0:1:6:0:C	1:4:9:4:G	1:12:36:12:G	1:2:6:2:G	1:1:15:1:C	1:1:13:1:C	.:0:16:0:C	.:0:0:0:.
7166_GGCCGTTCAGCCCTGTGCTTACTTCCCCAGAATGA_NODE_2_length_274_cov_11.102190	40	.	C	A	25.71	PASS	NS=7:AN=1:DP=66	GT:DP:GQ:EC:SG	1:2:3:2:A	1:25:75:25:A	1:8:21:8:A	1:5:12:5:A	1:14:39:14:A	1:4:9:4:A	1:8:21:8:A	.:0:0:0:.
9652_GGCCGGAACCTTGTTGCTAGGGAGAGGACGGTTTG_NODE_2_length_234_cov_11.487180	144	.	T	G	121.62	PASS	NS=8:AN=1:DP=294:AS=GCGGAGGAGACCAGCAGGGCGTGGGTGCGGAGGCTAACCTTCAGGAAGAG[T/G]GAGGACAGGTTACTCAGGACACTCCTAGGAGCAGATCTGAGGGTACAGGG	GT:DP:GQ:EC:SG	0:36:141:0:T	0/1:43:57:25:K	0:40:147:0:T	0:60:187:0:T	0:44:152:0:T	0:19:93:0:T	0:43:142:0:T	0:9:54:0:T
1423_GGCCGTCCGGATCGACCAGGAGATTAACAAGATCC_NODE_2_length_149_cov_6.946309	134	.	A	C	10.86	PASS	NS=7:AN=1:DP=33	GT:DP:GQ:EC:SG	1:11:30:11:C	1:2:1:2:C	1:2:3:2:C	1:4:9:4:C	.:0:0:0:.	1:5:12:5:C	1:4:9:4:C	1:5:12:5:C
8377_GGCCGAGCTCATTGCGGGAAAGCGAAAGCAAAGGA_NODE_2_length_216_cov_5.601852	106	.	C	T	45.71	PASS	NS=7:AN=1:DP=51	GT:DP:GQ:EC:SG	0:6:45:0:C	0/1:18:78:7:Y	0/1:11:41:1:C	0:4:39:0:C	0:5:42:0:C	.:0:0:0:.	0:2:33:0:C	0:5:42:0:C
1900_GGCCGGTGAGTTCAAAGCACTGGCTTTTTGGTTAG_NODE_2_length_277_cov_11.036101	135	.	A	G	59.12	PASS	NS=8:AN=1:DP=116:AS=TAAATTAGGCTATTGAGTCGATTTTCTAATAAAAACAACACATCATGAGC[A/G]TAAGTATGTAGGCACCACTACAAAGCCAAGCACTTAAATCTACTACATAA	GT:DP:GQ:EC:SG	0/1:3:2:1:A	0/1:20:103:11:R	1:11:30:11:G	0:27:108:0:A	0/1:23:83:10:R	0:8:51:0:A	0:16:75:0:A	1:8:21:8:G
4962_GGCCGAGTGCCATGGGCAGAAACATTGACACATAC_NODE_3_length_173_cov_4.890173	88	.	A	G	38.88	PASS	NS=8:AN=1:DP=220	GT:DP:GQ:EC:SG	0:1:30:0:A	0/1:91:22:18:A	0/1:38:43:11:R	0:34:100:0:A	0:14:69:0:A	0/1:17:10:3:A	0/1:23:4:5:R	0:2:33:0:A
3986_GGCCGAAGTGCACTTGTCCTGCAGACCCCGACCCA_NODE_2_length_223_cov_5.713005	65	.	C	T	32.88	PASS	NS=8:AN=1:DP=253	GT:DP:GQ:EC:SG	0/1:10:14:3:Y	0/1:53:19:13:Y	0/1:58:62:23:Y	0/1:41:26:10:Y	0/1:38:29:10:Y	0:10:57:0:C	0/1:38:40:11:Y	0/1:5:16:1:C
10272_GGCCGCCACGCTCTGGGCACCCTGCTACTAGCACC_NODE_2_length_276_cov_4.373188	30	.	A	C	15	PASS	NS=7:AN=1:DP=37	GT:DP:GQ:EC:SG	1:1:7:1:A	1:4:9:4:C	1:11:30:11:C	1:10:27:10:C	1:2:3:2:C	1:1:8:1:A	1:8:21:8:C	.:0:0:0:.
9275_GGCCGCGGAGCCCTCCCCGTCCACCCGGCGAAGTG_NODE_2_length_315_cov_10.749207	52	.	A	C	8.5	q10	NS=6:AN=1:DP=23:AS=AAAATCAAACAGCTGTTGAGAGAACAATACCGAAAAGGGAATTTGAAAAT[A/C]CAGTATAGATGTTTGTCATTAAAGCCTTGGAAAGAGTTGATACATACACG	GT:DP:GQ:EC:SG	.:0:0:0:N	1:3:6:3:C	1:3:6:3:C	1:5:12:5:C	1:3:6:3:C	1:2:3:2:C	1:7:18:7:C	.:0:0:0:.
1930_GGCCGAGGCTAGTCTGAAAGAATTTTCATAAACCA_NODE_2_length_324_cov_22.067902	69	.	A	T	69.38	PASS	NS=8:AN=1:DP=159	GT:DP:GQ:EC:SG	0:5:42:0:A	0/1:35:86:17:W	0/1:52:91:34:W	0:18:81:0:A	0:9:54:0:A	0:16:75:0:A	0:21:90:0:A	0:3:36:0:A
3633_GGCCGCCATCTTTCTCCGTCTCTCTACGGAAGCCT_NODE_2_length_215_cov_8.186047	215	.	A	T	8	q10	NS=6:AN=1:DP=18	GT:DP:GQ:EC:SG	1:3:6:3:T	1:2:3:2:T	.:0:0:0:.	1:7:18:7:T	1:2:3:2:T	.:0:16:0:A	1:3:9:3:T	1:1:9:1:A
3905_GGCCGCTCCTATAAGAGGCAAGCAGCGCGGCCCGC_NODE_2_length_350_cov_18.731428	345	.	A	C	24.67	PASS	NS=6:AN=1:DP=35	GT:DP:GQ:EC:SG	0/1:14:37:6:M	.:0:0:0:.	.:0:0:0:.	0/1:8:25:4:M	0:5:45:0:A	0/1:4:7:2:A	0/1:3:4:2:M	0:1:30:0:A
9042_GGCCGTATTAGCATAGTAATGGCCTTTAAATTGAG_NODE_2_length_249_cov_17.678715	23	.	T	C	50.86	PASS	NS=7:AN=1:DP=72	GT:DP:GQ:EC:SG	0:1:30:0:T	0/1:21:41:6:Y	0:21:90:0:T	0:14:69:0:T	0:2:33:0:T	0:4:39:0:T	0:9:54:0:T	.:0:0:0:.
8171_GGCCGTAGCACTTAATCACTAGGCCACCAGGGTTT_NODE_2_length_322_cov_13.788820	274	.	C	A	51.62	PASS	NS=8:AN=1:DP=94:AS=TCATAACATTAGTTGCAATTCCTTCAATGTGACAGCACTCTACCCACTTC[C/A]TCCCTGGGTTCCCTGTTTCCTTTTGCATGTCTTTCCTGCCCCTTCCTGCC	GT:DP:GQ:EC:SG	0:11:60:0:C	0:3:36:0:C	0:9:54:0:C	0:60:208:0:C	1:1:0:1:A	0:7:48:0:C	1:1:4:1:C	1:2:3:2:A
5871_GGCCGGCAGCTCGCGGTAAGAGCTCAAGACACCCA_NODE_2_length_237_cov_11.350211	82	.	G	A	89.14	PASS	NS=7:AN=1:DP=165	GT:DP:GQ:EC:SG	0:25:105:0:G	0:18:81:0:G	0:12:63:0:G	0:42:153:0:G	0:32:123:0:G	0/1:16:62:9:R	0/1:20:37:15:R	.:0:0:0:N
4196_GGCCGCGCTGTGGTCCCACTAGTCTTGGATGGAGC_NODE_2_length_269_cov_12.557621	28	.	A	G	31.5	PASS	NS=8:AN=1:DP=40	GT:DP:GQ:EC:SG	1:4:9:4:G	0/1:15:66:11:R	1:9:33:9:G	0:2:33:0:A	0:1:30:0:A	0:3:36:0:A	1:3:9:3:G	0:3:36:0:A
2103_GGCCGATTCTGACTCACAGCGACCCTATGCACAAC_NODE_2_length_282_cov_19.946808	258	.	C	T	46	PASS	NS=8:AN=1:DP=57	GT:DP:GQ:EC:SG	0:5:42:0:C	0/1:9:29:4:Y	0:9:60:0:C	0:9:54:0:C	0:4:39:0:C	0:8:51:0:C	0:3:36:0:C	0:10:57:0:C
4923_GGCCGGTAATTTCATCAGACTCCATACCCAATTCG_NODE_2_length_176_cov_8.340909	128	.	T	A	49	PASS	NS=8:AN=1:DP=89	GT:DP:GQ:EC:SG	0:2:33:0:T	0:3:36:0:T	0:18:81:0:T	0:32:68:0:T	0:14:69:0:T	0/1:5:13:2:W	0/1:8:44:4:W	0:7:48:0:T
6356_GGCCGACAAATTCTCTTTGTTCTCCTACATGGAAA_NODE_2_length_310_cov_17.125807	56	.	T	A	25.43	PASS	NS=7:AN=1:DP=61:AS=GTATGGAGCGGTTCTACTCTGCATACATGCATAGCCATGAGTCGAAATCA[T/A]CTTGATGGCAATGGTGTGGGTGGGAGGCGAGGGTGTTGGTTTGTTTTTTT	GT:DP:GQ:EC:SG	1:3:6:3:A	1:23:81:23:A	1:12:33:12:A	1:9:24:9:A	1:5:12:5:A	1:1:1:1:T	1:8:21:8:A	.:0:0:0:.
2856_GGCCGCCGGCTCCGAAGTCCCTGGGGGCTCAGCTG_NODE_2_length_296_cov_20.672297	212	.	C	G	10.38	PASS	NS=8:AN=1:DP=33	GT:DP:GQ:EC:SG	1:1:1:1:C	1:4:9:4:G	1:5:12:5:G	0/1:5:21:4:S	1:7:18:7:G	0/1:2:1:1:C	1:5:12:5:G	1:4:9:4:G
5933_GGCCGGCCCGGGCAAGAGGAACTCCGAGGGGCTGT_NODE_2_length_304_cov_7.865131	268	.	T	C	29.29	PASS	NS=7:AN=1:DP=25	GT:DP:GQ:EC:SG	0/1:10:23:3:Y	0:1:30:0:T	.:0:0:0:N	0:2:33:0:T	0:1:30:0:T	1:1:2:1:T	0:1:30:0:T	0:9:57:0:T
11170_GGCCGTTGGAGCTGGCCAATGGGCGCCGGGGGCAG_NODE_2_length_341_cov_24.791788	217	.	C	G	84	PASS	NS=8:AN=1:DP=774:AS=TAAACAGGAGTGTGGGGGATTCCTGTTTTGGTCACCAACCCTGAGAGGCA[C/G]TACACGCCCATAGAAGGTCATTCTGTCAAGATAATAGATATTATCTTGGT	GT:DP:GQ:EC:SG	0/1:71:98:32:S	0/1:71:101:41:S	0/1:156:108:75:S	0/1:148:90:61:S	0/1:126:67:45:S	0/1:59:73:20:S	0/1:130:88:54:S	0/1:13:47:5:S
10062_GGCCGCCTCCTGGGTCTCCTTTGTTCACGTCTTTC_NODE_2_length_350_cov_8.494286	76	.	A	G	27.29	PASS	NS=7:AN=1:DP=67	GT:DP:GQ:EC:SG	1:2:3:2:G	1:19:54:19:G	1:22:63:22:G	1:8:21:8:G	1:5:12:5:G	1:1:8:1:A	1:10:30:10:G	.:0:0:0:.
7220_GGCCGGAGGCCGCCTACGCCCGGGGCTGACTGACA_NODE_2_length_414_cov_15.347826	340	.	C	A	37.43	PASS	NS=7:AN=1:DP=103:AS=ATGAGAATGTGCCTACTGTTCAGAAATAAAAATTTAAAAGTAATTGCTAC[C/A]GGTGTATGTATAAATACATATTCCCGGGCCCTGCCAAGGCCTAACTATCC	GT:DP:GQ:EC:SG	1:36:108:36:A	.:0:0:0:.	1:1:0:1:A	1:4:9:4:A	1:2:3:2:A	1:1:4:1:C	1:3:6:3:A	1:56:132:56:A
5640_GGCCGCTCAGATCACCCGGCACAAGTGGGAGGCTG_NODE_2_length_297_cov_11.616161	172	.	G	C	39.38	PASS	NS=8:AN=1:DP=104	GT:DP:GQ:EC:SG	0/1:5:14:1:G	0/1:23:46:2:G	0/1:22:31:6:S	0/1:21:43:2:G	0:15:46:0:G	0:5:42:0:G	0:3:36:0:G	0:10:57:0:G
9654_GGCCGCGCGTGTTAAACAGGACGCCTGGGAGGGAG_NODE_2_length_276_cov_10.952899	56	.	C	A	20.25	PASS	NS=8:AN=1:DP=59	GT:DP:GQ:EC:SG	1:4:9:4:A	1:18:54:18:A	1:11:33:11:A	1:7:18:7:A	1:3:6:3:A	1:3:6:3:A	1:10:30:10:A	1:3:6:3:A
4026_GGCCGTCTCTTTCCACCTCTGCTCTCTCTGCTTTG_NODE_2_length_284_cov_19.552816	143	.	G	A	70.88	PASS	NS=8:AN=1:DP=298:AS=CAAGCAAATGCAAGCTCCCGCTATTCATTAACACAGAAGAGTACAGTTTC[G/A]GGGGCAATTACCAAATTTTTATATTCATAGAAATCCAGTTTCCCTGGAGA	GT:DP:GQ:EC:SG	1:14:39:14:A	1:63:106:63:A	1:51:100:51:A	0:48:171:0:G	0/1:45:61:21:R	0/1:11:18:4:R	0/1:57:65:27:R	0/1:9:7:3:R
8645_GGCCGGCACCCAGCTGGCCTTTGAAGGGGGGTGGC_NODE_2_length_250_cov_7.068000	11	.	C	T	11.17	PASS	NS=6:AN=1:DP=19	GT:DP:GQ:EC:SG	1:1:4:1:C	1:4:9:4:T	1:5:12:5:T	0/1:3:20:2:Y	1:5:12:5:T	1:1:10:1:C	.:0:0:0:.	.:0:0:0:.
7934_GGCCGCATGGGTGTCATTGGTTCCTTTGACTAGAT_NODE_2_length_272_cov_15.319853	186	.	G	A	158.5	PASS	NS=8:AN=1:DP=548:AS=CTACAAAACCAAAAACCAAATCCGTTGCTGTGTAGTCCATTCCGACTCAT[G/A]GCGATTCTATAGGATAGAGAACCGCCCCATAGGGTTTCCAAGGCTCTAAT	GT:DP:GQ:EC:SG	0/1:42:92:23:R	0:47:171:0:G	0:103:222:0:G	0:93:217:0:G	0/1:89:92:46:R	0:38:150:0:G	0:112:225:0:G	0:24:99:0:G
6782_GGCCGCGGTCGCCTTCCTCCACGCGGGCGGGGGCG_NODE_2_length_315_cov_5.238095	59	.	A	G	7	q10	NS=7:AN=1:DP=26	GT:DP:GQ:EC:SG	1:1:6:1:A	1:6:15:6:G	1:3:6:3:G	0/1:10:2:9:G	1:1:11:1:A	1:2:3:2:G	1:3:6:3:G	.:0:0:0:.
9563_GGCCGGGATCAGTCGCTGCCCCTGCATCTTGACCC_NODE_5_length_186_cov_14.102151	50	.	C	T	24	PASS	NS=7:AN=1:DP=66	GT:DP:GQ:EC:SG	1:3:6:3:T	0/1:14:10:3:Y	0:15:72:0:C	0/1:13:36:5:Y	0/1:12:13:2:C	1:1:4:1:C	1:8:27:8:T	.:0:0:0:.
7836_GGCCGCGCACCAGGCGGGGCACTGCATGGACTACA_NODE_2_length_298_cov_11.322147	34	.	G	T	8	q10	NS=6:AN=1:DP=19	GT:DP:GQ:EC:SG	.:0:0:0:.	1:1:9:1:G	1:6:15:6:T	.:0:0:0:N	1:2:3:2:T	1:1:0:1:K	1:7:18:7:T	1:2:3:2:T
8064_GGCCGTCATGGCGCTGCAGGAGGCGTGCGAGGCCT_NODE_3_length_283_cov_11.816255	94	.	T	C	86	PASS	NS=8:AN=1:DP=171	GT:DP:GQ:EC:SG	0:15:72:0:T	0:31:120:0:T	0:52:184:0:T	0:28:111:0:T	0:19:87:0:T	0/1:9:39:1:T	1:13:36:13:C	0:4:39:0:T
10832_GGCCGTCTCTAGCGCGGCCCCACGTAATGGCGGAG_NODE_2_length_315_cov_7.368254	160	.	G	A	132.12	PASS	NS=8:AN=1:DP=298:AS=GGAACCGAGGTGGTGGTGGTAGCGATGATATTCTCTTTCCCTAGATTCCT[G/A]TCTGCTTTGCAGCTCCTGCGAAGCGAGGTGGAGGCCCTTGGGATAGGGTT	GT:DP:GQ:EC:SG	0:14:69:0:G	0/1:40:85:14:R	0:49:178:0:G	0:58:202:0:G	0:47:168:0:G	0:26:105:0:G	0:55:196:0:G	0:9:54:0:G
1246_GGCCGCGGGCGGCAAGGAGGCGGGCCCGGANCCTG_NODE_2_length_244_cov_5.950819	40	.	T	G	76.86	PASS	NS=7:AN=1:DP=267	GT:DP:GQ:EC:SG	1:14:39:14:G	1:80:125:80:G	1:50:113:50:G	1:21:43:20:G	1:28:49:27:G	1:23:66:23:G	1:51:103:50:G	.:0:0:0:.
4142_GGCCGACACCACAAGTACACCCTGGCCTCCCTGGG_NODE_2_length_272_cov_6.595588	196	.	G	A	62.25	PASS	NS=8:AN=1:DP=236:AS=GGTGGCTGTGGTGGCAGGAAAGGGCCCAGGGAGAAAGGCCATGTGGTCTA[G/A]GTACACCGAGGAGGAAGGAGAAAGTGGGGACCGTGGGCAAGGCCTGGGGC	GT:DP:GQ:EC:SG	1:14:14:13:A	0:10:60:0:G	0:35:132:0:G	0/1:58:45:20:R	0/1:36:7:8:R	1:21:60:21:A	0/1:37:72:19:R	0:25:108:0:G
4372_GGCCGGCGCGCTGGCGCTGACGGCGGGCGGGAATG_NODE_2_length_322_cov_7.726708	84	.	C	A,G	34.25	PASS	NS=8:AN=2:DP=218	GT:DP:GQ:EC:SG	0/1/2:14:12:2,3:S	0/2:49:74:4:C	0/1/2:52:69:16,6:M	0/1:33:22:7:M	0/1:24:60:8:M	0/1:9:0:2:M	0/1/2:29:31:4,7:S	0/1/2:8:6:2,2:M
8583_GGCCGCCCTGCCAAGGGCTTGCGCGCCAGAGGTAG_NODE_4_length_159_cov_19.899370	134	.	A	G	36.14	PASS	NS=7:AN=1:DP=73	GT:DP:GQ:EC:SG	1:13:39:13:G	1:2:3:2:G	.:0:0:0:N	0/1:18:92:11:R	0/1:12:57:8:R	1:6:15:6:G	0/1:13:23:10:R	1:9:24:9:G
9678_GGCCGAGAAGGTTCCGCGTGGGACTGTAGAGGGAC_NODE_2_length_207_cov_8.661836	177	.	G	C	34	PASS	NS=8:AN=1:DP=112	GT:DP:GQ:EC:SG	0/1:3:17:1:G	0:8:51:0:G	0:7:48:0:G	0/1:24:47:10:S	0/1:28:75:14:S	0/1:7:2:6:S	0/1:30:30:9:S	0/1:5:2:2:G
10008_GGCCGGAGAGAAAGCTATAGGCCAGCCCTTCATCA_NODE_2_length_231_cov_6.839827	58	.	C	T	33.12	PASS	NS=8:AN=1:DP=71:AS=ACCAGCTAGACATAGCCCTGTGTTACACACGCTGTGGGTGTGAGCTCAGA[C/T]GATATGCATCTGCACATACTGGACGAGAGGAATTTTGACGTTTTGCAGAT	GT:DP:GQ:EC:SG	1:8:21:8:T	0/1:29:99:13:Y	0:3:36:0:C	0:7:48:0:C	1:1:10:1:C	0/1:11:6:2:C	0/1:8:6:2:Y	0:4:39:0:C
977_GGCCGTCACCACTGGCAGTTCTCACAGCTCAGTGC_NODE_3_length_225_cov_24.804445	143	.	C	T	99.38	PASS	NS=8:AN=1:DP=317	GT:DP:GQ:EC:SG	0/1:19:70:11:Y	0/1:61:61:24:Y	1:66:118:66:T	0:70:214:0:C	0:40:147:0:C	0/1:14:21:4:Y	0:40:150:0:C	0/1:7:14:6:Y
8645_GGCCGGCACCCAGCTGGCCTTTGAAGGGGGGTGGC_NODE_2_length_250_cov_7.068000	79	.	A	G	56.62	PASS	NS=8:AN=1:DP=173:AS=ATGGTTCCAAAAGCATTGTCTTCTGGAGTCTGCGTTTCCAGGCGAGGAAG[A/G]GCGGAGGCTGATGAAGCTATCTGCGGAGCTTCCCCTTGAGCTGGAGCAGG	GT:DP:GQ:EC:SG	1:10:27:10:G	1:40:111:40:G	1:47:113:47:G	1:24:69:24:G	1:16:57:16:G	1:10:27:10:G	1:22:40:21:G	1:4:9:4:G
3152_GGCCGCAGACATTGGCCCTGGTCTCCGGCCCGACC_NODE_2_length_283_cov_5.876325	98	.	G	T	52.88	PASS	NS=8:AN=1:DP=154:AS=CCTACAGGACAGAGTAAAACTTCCCCAGAGGGTTTCCAAGGCCGTAATCC[G/T]TATGGAAGCAGATCACCACGTCTTTCTCCCATGGAGCAGCTGGTAGGTTC	GT:DP:GQ:EC:SG	1:12:33:12:T	1:47:123:47:T	1:32:93:32:T	1:15:42:15:T	1:16:45:16:T	1:9:24:9:T	1:19:54:19:T	1:4:9:4:T
9944_GGCCGCCAAGAGGAGGCTCCTTAAGGAGCGGATCT_NODE_2_length_246_cov_7.756098	105	.	T	C	81.25	PASS	NS=8:AN=1:DP=402	GT:DP:GQ:EC:SG	0:18:81:0:T	0:85:204:0:T	0/1:82:85:9:T	0/1:80:50:12:T	0:46:136:0:T	0/1:12:41:1:T	0/1:62:19:11:T	0/1:17:34:5:Y
9448_GGCCGGGTGCTCGGGCCAGGTGGCTGGGACAGCGG_NODE_2_length_308_cov_10.500000	269	.	G	A	66.62	PASS	NS=8:AN=1:DP=139	GT:DP:GQ:EC:SG	0:19:84:0:G	0:1:30:0:G	0/1:10:38:7:R	0:34:129:0:G	1:20:57:20:A	1:14:39:14:A	0:24:99:0:G	0/1:17:57:9:R
8014_GGCCGAAAAAACAAGAGATTTTCAGAAGTCCTGAG_NODE_2_length_279_cov_14.756272	261	.	G	A	60.62	PASS	NS=8:AN=1:DP=131	GT:DP:GQ:EC:SG	0/1:18:95:11:R	1:4:9:4:A	0/1:5:11:1:G	0/1:29:64:9:R	1:24:69:24:A	0:4:39:0:G	0:30:117:0:G	0:17:81:0:G
489_GGCCGGCGGGGTGCGGGCAGGGGAGGGCGCAGAGC_NODE_2_length_392_cov_6.933673	345	.	T	C	19.5	PASS	NS=6:AN=1:DP=41:AS=ACTAGATGTAATATTTGCTATAATGCAATTAAAATTCTACAGTAACCAAA[T/C]CTCTAGAAAGAAAATCTTCGCAACAATGTCAAATTAATTATAGGTCACAA	GT:DP:GQ:EC:SG	.:0:0:0:.	1:12:33:12:C	1:16:45:16:C	0/1:3:18:1:T	1:4:9:4:C	1:2:3:2:C	1:4:9:4:C	.:0:0:0:.
8855_GGCCGCGTCGGGCGTGGGCCTCCGCTTCCTCCCGC_NODE_2_length_274_cov_7.726277	211	.	A	G	53.71	PASS	NS=7:AN=1:DP=105	GT:DP:GQ:EC:SG	1:1:0:1:R	.:0:0:0:.	0/1:4:13:2:R	0/1:27:61:8:R	0/1:20:92:12:R	0:15:72:0:A	1:29:84:29:G	0:9:54:0:A
7742_GGCCGCTGCCAGTTCAGGCCAGAGGGTGGCGTAAG_NODE_2_length_336_cov_3.639881	231	.	C	G	45.12	PASS	NS=8:AN=1:DP=128:AS=ATCGCCTAGAGCCCAGCGCCGGGTCCCCTCCTCGCAGCAATCCTCTGCGC[C/G]CTGCACAGTTCTGGCTGGTAAGGGCCAGAGGGGAGAAGGAAGGAGAGGGG	GT:DP:GQ:EC:SG	1:6:15:6:G	1:22:63:22:G	1:43:110:43:G	1:21:60:21:G	1:10:27:10:G	1:3:6:3:G	1:22:66:22:G	1:1:14:1:C
4959_GGCCGGCCTCCTGCTGCGGCTCCCCTATTCCACGT_NODE_2_length_288_cov_4.333333	264	.	A	T	10.71	PASS	NS=7:AN=1:DP=23	GT:DP:GQ:EC:SG	1:9:24:9:T	.:0:0:0:.	1:1:10:1:A	1:8:21:8:T	1:1:10:1:A	1:1:4:1:A	1:2:3:2:T	1:1:3:1:A
10196_GGCCGCCGACACGACCGCTCAGATCACCCAGCGCA_NODE_5_length_148_cov_13.804054	63	.	G	A	33.38	PASS	NS=8:AN=1:DP=169	GT:DP:GQ:EC:SG	0/1:5:14:1:G	0/1:46:48:14:R	0/1:32:56:13:R	0/1:24:47:2:G	0/1:22:18:6:R	0/1:15:5:4:R	0/1:21:59:10:R	0/1:4:20:3:R
384_GGCCGGGAGCACAAACTGTTGTGGGCACCCTCTTT_NODE_2_length_301_cov_14.561461	60	.	G	C	47.62	PASS	NS=8:AN=1:DP=94	GT:DP:GQ:EC:SG	0:3:36:0:G	0:23:96:0:G	0:23:96:0:G	0/1:16:15:2:G	0:7:48:0:G	0:4:39:0:G	0/1:17:21:4:S	0:1:30:0:G
9149_GGCCGCTAACCAAAAGGTTGGCAGTTGGAATCCAC_NODE_2_length_211_cov_10.270143	158	.	G	C	48.88	PASS	NS=8:AN=1:DP=173	GT:DP:GQ:EC:SG	0/1:15:47:5:S	0:31:123:0:G	0:32:123:0:G	0/1:17:6:3:S	0/1:27:3:4:S	0:8:39:0:G	0/1:36:2:6:S	0:7:48:0:G
570_GGCCGGGCCGGCGTGGGGCCCGCTGCTGAGGGCAG_NODE_3_length_145_cov_4.758621	134	.	C	T	28.17	PASS	NS=6:AN=1:DP=21	GT:DP:GQ:EC:SG	1:1:14:1:C	0/1:8:35:1:C	.:0:16:0:C	0:4:39:0:C	1:4:15:4:T	0:1:30:0:C	0:3:36:0:C	.:0:0:0:N
438_GGCCGGAGCCCAAAACCCGGCAGCCGACGCAGAGT_NODE_2_length_328_cov_6.298780	301	.	A	C	46.62	PASS	NS=8:AN=1:DP=111	GT:DP:GQ:EC:SG	0/1:10:12:3:M	0:6:45:0:A	0/1:26:61:12:M	0:24:67:0:A	0:15:72:0:A	0/1:8:25:6:M	0/1:15:72:9:M	0/1:7:19:5:M
8394_GGCCGTGGAGCCAATACCATCTGTATAACTTTATT_NODE_2_length_278_cov_14.356115	118	.	C	T	67.12	PASS	NS=8:AN=1:DP=220:AS=GCTTTGGGCCCTGTGGTTTGTGGTAGGGGCCCAGGACAGGGTGGGTACTC[C/T]CAAGGCACTTTGGCCCTTACTCCTGGACCTATTCTGCTTCTAGTGACCAC	GT:DP:GQ:EC:SG	1:16:48:16:T	0:42:153:0:C	0/1:28:62:14:Y	0/1:59:58:23:Y	0/1:19:62:11:Y	0:17:78:0:C	0/1:34:60:13:Y	0/1:5:16:1:C
9165_GGCCGCGTGTTTTCATTCTGAGGCTGCAGGACGAA_NODE_2_length_266_cov_7.785714	45	.	G	T	19.29	PASS	NS=7:AN=1:DP=22	GT:DP:GQ:EC:SG	1:1:0:1:G	0:9:54:0:G	1:3:6:3:T	0:2:33:0:G	0:1:30:0:G	.:0:0:0:.	1:3:6:3:T	1:3:6:3:T
7709_GGCCGGGTATTTGCATAGAACGTTATCTGCGGAAT_NODE_2_length_171_cov_6.614035	107	.	C	G	48	PASS	NS=8:AN=1:DP=782	GT:DP:GQ:EC:SG	0/1:47:67:4:C	0/1:19:32:5:S	0/1:102:27:20:C	0/1:202:100:93:S	0/1:100:21:19:C	0/1:86:59:30:S	0/1:108:67:17:C	0/1:118:11:27:C
8212_GGCCGAGGGCTGCTTGGGCCTGGAGCAGCTCACAC_NODE_2_length_236_cov_5.080509	136	.	T	G	45.62	PASS	NS=8:AN=1:DP=145:AS=AGCCCATGCATCTGCCGCACCATGCGGTTGATGCCATCATCACTGATGTG[T/G]CAGGAGCAGAGAGAAAGGGACTTGAGGCCGTCCAGCCCCTGAGCTATGTA	GT:DP:GQ:EC:SG	1:9:30:9:G	1:18:54:18:G	1:30:96:30:G	0/1:30:17:27:G	1:21:63:21:G	1:10:30:10:G	1:22:63:22:G	1:5:12:5:G
8240_GGCCGCCTGCCCGCCACTCGCCCTGGCTCGCTGAA_NODE_2_length_161_cov_6.124224	138	.	G	A	29.29	PASS	NS=7:AN=1:DP=67	GT:DP:GQ:EC:SG	1:11:30:11:A	.:0:17:0:G	1:12:33:12:A	0/1:23:49:10:R	0:6:45:0:G	0/1:2:15:1:G	1:8:21:8:A	1:5:12:5:A
10003_GGCCGTTTCCCCCGGAGAACTGCCTCGCCGTAGCC_NODE_2_length_182_cov_6.456044	42	.	C	T	41.88	PASS	NS=8:AN=1:DP=237	GT:DP:GQ:EC:SG	0/1:12:73:8:Y	0/1:31:36:6:Y	0/1:45:38:12:Y	0/1:50:44:15:Y	0/1:56:34:16:Y	0/1:8:31:3:Y	0/1:27:61:13:Y	0/1:8:18:3:Y
3287_GGCCGCCGCTGCTTCGTGGAGGCCGCGGAGGTGGG_NODE_2_length_218_cov_7.513762	153	.	C	G	127.5	PASS	NS=8:AN=1:DP=416	GT:DP:GQ:EC:SG	0:28:111:0:C	0/1:48:36:11:S	0/1:42:30:5:C	0:70:211:0:C	0:80:183:0:C	0:43:156:0:C	0:86:209:0:C	0:19:84:0:C
1831_GGCCGGGCTGATAGGACCCCAGAGGCGACCTGGCT_NODE_2_length_278_cov_9.442446	65	.	C	T	60.71	PASS	NS=7:AN=1:DP=116:AS=CTGGAGTCGATGGCGGCTCAGAGCGACCCCATGTGACAGTGTAGAACTGC[C/T]CCATAGAGTTTCCTAGGCTGTAATCTTTACAGGAGAAGGTCGTCAGGCCT	GT:DP:GQ:EC:SG	0:7:48:0:C	0:22:93:0:C	0/1:43:68:29:Y	0:13:66:0:C	0:17:78:0:C	0/1:5:18:4:Y	0:9:54:0:C	.:0:0:0:.
7380_GGCCGGCTCTCGTCTGCAAAAATAGACCAATGTGG_NODE_2_length_283_cov_18.162544	171	.	C	T	79.75	PASS	NS=8:AN=1:DP=210:AS=ATTCTTTGCATTGCCTCACAGCAGACACAGGGGTAAACCGTGAGTCCATT[C/T]GGTTTCCAGATGCTTACTGGAATCTCCCTTTTGCTCTTGGTGTCCATGGG	GT:DP:GQ:EC:SG	0:8:51:0:C	0:10:60:0:C	0:26:105:0:C	0/1:77:77:45:Y	0:24:99:0:C	1:16:45:16:T	0:27:108:0:C	0:22:93:0:C
3378_GGCCGGCACAGGGCGTTTACAGGGCGGTGTCTGGG_NODE_2_length_270_cov_14.674074	222	.	G	T	67.25	PASS	NS=8:AN=1:DP=296:AS=CTCACCCTCTGCACTGGGAGCTCCTTGAGGGCAAGGCTGTGTCTTTGAAG[G/T]CACAGTGCCAGTCTGGGCGATAGAAGATGCTGTCACAAATATTTTTGGTC	GT:DP:GQ:EC:SG	1:35:102:35:T	1:7:18:7:T	1:28:81:28:T	0/1:78:69:33:K	1:36:93:36:T	1:39:92:39:T	0/1:42:23:15:K	0/1:31:60:16:K
9581_GGCCGCCCATTCAGGTGAGCAGACGGCCCCTGGGG_NODE_2_length_239_cov_4.853557	43	.	A	C	25.17	PASS	NS=6:AN=1:DP=58	GT:DP:GQ:EC:SG	.:0:0:0:N	0/1:15:15:3:A	0/1:15:23:4:M	0/1:15:46:8:M	0:3:36:0:A	.:0:0:0:.	0/1:9:1:2:A	0:1:30:0:A
8970_GGCCGAAGTTTTTGCTGATTCAAAGTTTCCTGTCT_NODE_2_length_332_cov_21.460844	264	.	G	A	98.38	PASS	NS=8:AN=1:DP=441:AS=CTTCCCACAGCATCTTTTTCTCCATCTTCTTCCTTGGCCTGGAGGATTGC[G/A]TTGTTTGGTTTCCACCATTGCCACATTATGGAATCCTGCTGTCTTGCTTC	GT:DP:GQ:EC:SG	0:50:178:0:G	1:16:45:16:A	0/1:41:98:20:R	0/1:88:58:26:R	0/1:79:106:43:R	0/1:31:97:21:R	0/1:86:105:45:R	0/1:50:100:25:R
9387_GGCCGTCTGTTTCCTTGGAGATTTATAGCCTTAGA_NODE_2_length_263_cov_11.000000	180	.	A	G	31.62	PASS	NS=8:AN=1:DP=109:AS=CCACTTTCCTAGTTTAGCTTTCTTATTTGGGTCAAAGGTCATTTGTGCAA[A/G]TCTGATTTGGAACTCTTCTCTCTCACACTTGAACTCACGTGCCCTTTAAA	GT:DP:GQ:EC:SG	1:6:15:6:G	1:4:9:4:G	0/1:11:0:10:R	0/1:33:73:16:R	0/1:22:48:8:R	0/1:9:34:7:R	1:18:51:18:G	0/1:6:23:3:R
9617_GGCCGTGGGAAACTTCCTCACTAACTGGCTGACGT_NODE_2_length_298_cov_26.003355	284	.	G	A	26.25	PASS	NS=8:AN=1:DP=63	GT:DP:GQ:EC:SG	1:5:12:5:A	1:1:8:1:G	1:4:9:4:A	0/1:14:34:5:R	0:19:84:0:G	1:6:15:6:A	0/1:10:39:5:R	0/1:4:9:1:G
10362_GGCCGGGAGGTGCCTTTGTTAGCGTCCCAGGTCCA_NODE_2_length_268_cov_14.690298	208	.	C	A	18	PASS	NS=8:AN=1:DP=140:AS=ACGAATCTGTAAACAGTCACTGGCGTGTCTAGAAAATGTTGCTTCAGAAA[C/A]AATCTCCAGAATTTTCTGATTTGCATCATAAAAAATATCGCTTAAGGCAT	GT:DP:GQ:EC:SG	1:4:9:4:A	1:1:3:1:A	0/1:20:22:6:M	0/1:40:9:9:M	0/1:23:22:4:C	0/1:7:4:2:C	0/1:30:3:6:C	0:15:72:0:C
7858_GGCCGGAGAGTAAACAAAGGAGGCTTAAATTATTT_NODE_2_length_316_cov_21.911392	69	.	C	T	97	PASS	NS=8:AN=1:DP=209:AS=CACACCAAAACCCACTCCCGTGGAGTCGATTCCGACTCATAGCGACCCTA[C/T]AGAACAGAGTAGAACTGCCCGATAGTTTCCAAGGAGCGCCTGGCAGATTC	GT:DP:GQ:EC:SG	0:5:42:0:C	0:36:135:0:C	0:63:207:0:C	0/1:30:86:11:Y	1:33:99:33:T	0:15:72:0:C	0:26:105:0:C	0:1:30:0:C
4547_GGCCGCAGGTCAGACCTGAGGGCTTCTCGGGCGGT_NODE_2_length_222_cov_6.171171	98	.	C	G	34.29	PASS	NS=7:AN=1:DP=86:AS=ACTTTCCCCAAGTCCTAGAGTGGTGACTCTGGGGTGGGGGTAAGATGAGT[C/G]AAGGCCACAGGGACACCAACGTGGTCCCAAGGGAAGGCTAAACCCTAAAG	GT:DP:GQ:EC:SG	1:7:18:7:G	1:16:48:16:G	1:8:21:8:G	1:19:54:19:G	1:8:21:8:G	1:3:6:3:G	1:25:72:25:G	.:0:0:0:N
1882_GGCCGCTTCACCTCCAAACATCAGTTTTGTAATCT_NODE_2_length_244_cov_14.901639	30	.	C	A	29.88	PASS	NS=8:AN=1:DP=36	GT:DP:GQ:EC:SG	0/1:4:15:1:C	0:3:36:0:C	0/1:8:37:5:M	0:7:48:0:C	0:7:48:0:C	0:1:30:0:C	0/1:5:20:4:M	1:1:5:1:C
3467_GGCCGTGGGCAGCCAGGTGGCGGTGAGGGAAGGGG_NODE_2_length_282_cov_19.312057	39	.	C	A	8	q10	NS=6:AN=1:DP=22	GT:DP:GQ:EC:SG	.:0:0:0:N	1:6:15:6:A	.:0:0:0:.	1:5:12:5:A	1:4:9:4:A	1:2:3:2:A	1:3:6:3:A	1:2:3:2:A
3620_GGCCGCAGCGGGCGCTGTGGGGACGCGAGGAGGCT_NODE_2_length_291_cov_13.474227	44	.	C	G	22.83	PASS	NS=6:AN=1:DP=50	GT:DP:GQ:EC:SG	.:0:0:0:.	1:25:72:25:G	1:13:36:13:G	1:2:8:2:S	1:5:12:5:G	1:1:0:1:S	1:4:9:4:G	.:0:0:0:.
3297_GGCCGACACCCTGATCTTGGACTCCCCGCCTCCAG_NODE_2_length_311_cov_15.961414	89	.	C	G	69	PASS	NS=8:AN=1:DP=197:AS=ATTTCATCATGCACGGGAAGTGTTTCCTAAAATGCAAGAAATGCAAACAT[C/G]TTCAAGCCTCTCAATGTTCAAGAATCAAGGAAGCGTTGGGGAAAAAAAAA	GT:DP:GQ:EC:SG	0:17:78:0:C	0:22:93:0:C	0/1:68:112:42:S	0/1:29:71:9:S	0/1:28:12:5:S	0:8:51:0:C	0/1:21:96:14:S	0:4:39:0:C
1635_GGCCGCCACGCCATGGCGTCCTCGGGGCTCCTCGT_NODE_2_length_256_cov_7.613281	33	.	A	C	10.71	PASS	NS=7:AN=1:DP=31	GT:DP:GQ:EC:SG	1:5:12:5:C	1:11:30:11:C	1:5:12:5:C	1:5:12:5:C	1:2:3:2:C	.:0:0:0:.	1:2:3:2:C	1:1:3:1:A
3094_GGCCGACCGGCCACGGGGCCCCACCGACCTCGCAC_NODE_2_length_311_cov_15.453376	198	.	C	G	95.43	PASS	NS=7:AN=1:DP=225:AS=TCTGTAAAGAACACGGCAAACTTTTTTTTAAAGGACCAAATATGCAAATA[C/G]CAAGCTTCTTGGCTTCCCCCAGGGTATCTTTCATAACTGACACTCGCGGT	GT:DP:GQ:EC:SG	1:2:3:2:G	.:0:0:0:.	0/1:8:43:4:S	0:80:220:0:C	0:40:153:0:C	0:23:99:0:C	0/1:61:90:37:S	0:11:60:0:C
10460_GGCCGGAGACTCGCTCCTGTCGACTTCTGTGTGTT_NODE_2_length_345_cov_13.710145	216	.	A	G	150.25	PASS	NS=8:AN=1:DP=465:AS=TCCTAAAGTGAAAAGATCTGAGGTGATGAGGGAAACGACTGGCCGCCTAA[A/G]AAGGGGGGAAGTTCCCTCAAAGAGGACGGACTGTCTGCTCTCTGAGGGCA	GT:DP:GQ:EC:SG	0:16:75:0:A	0:87:213:0:A	0:93:212:0:A	0:67:209:0:A	0/1:66:66:35:R	0:36:135:0:A	0:80:205:0:A	0:20:87:0:A
5374_GGCCGACAGGGCTCAGGCCCGTCACCCCCCGGGTC_NODE_2_length_347_cov_17.835735	221	.	T	C	89.88	PASS	NS=8:AN=1:DP=293:AS=TTCCAGCTTGTCTGTCTTCTTTTCTTTAATTAAATATAGGTGCAGATTTC[T/C]CTTATCAATATCAATACACTTGGGTTTATATTTGCCTGTTGACAAAGTCT	GT:DP:GQ:EC:SG	0/1:19:60:9:Y	0/1:39:80:21:Y	0/1:54:15:12:Y	0:66:215:0:T	0:41:150:0:T	0:21:90:0:T	0/1:30:48:10:Y	0/1:23:61:10:Y
5800_GGCCGAACAAGTCAGCCCCGCCGGGGCGCCCTACG_NODE_2_length_221_cov_8.199095	63	.	A	C	27.88	PASS	NS=8:AN=1:DP=123:AS=CCCCATGAAGGCCAAAAGTCAAGGTAGCTTTACTACTCGAAAGAAAAGGA[A/C]CGGCAGGAACCTGGCCGTACCGGATAGGAAAGAATCACTAGAACTAGTGG	GT:DP:GQ:EC:SG	0/1:12:2:11:C	1:26:55:25:C	0/1:34:37:30:C	0/1:10:18:9:C	1:13:42:13:C	1:7:18:7:C	1:19:48:19:C	1:2:3:2:C
6912_GGCCGACGCACAGTCCCGGCTGGGCTGCTCTGCAC_NODE_2_length_319_cov_13.106583	216	.	G	A	107.25	PASS	NS=8:AN=1:DP=276:AS=CAGTTAGAAGGGAACATCGACGTATGATATTTTCAAGCCTATAATTTGCC[G/A]GTTGCAAGAGGAAGTACTTAATAAAATTGTGACTCTTACTGGCGGAGAAA	GT:DP:GQ:EC:SG	1:19:54:19:A	0/1:26:46:9:R	1:42:108:41:A	0:68:218:0:G	0:45:162:0:G	0:22:96:0:G	1:47:126:47:A	0:7:48:0:G
8756_GGCCGCCCCGGAGGCCGGCTCTCTCCTCTGCCGCC_NODE_2_length_200_cov_14.140000	9	.	A	T	5.67	q10	NS=6:AN=1:DP=10	GT:DP:GQ:EC:SG	1:1:10:1:A	.:0:16:0:A	1:3:6:3:T	1:1:5:1:A	1:2:6:2:T	1:2:3:2:T	1:1:4:1:A	.:0:0:0:.
7274_GGCCGAGGCGCCCGACAAGGCCCCCGAGCCCGAGG_NODE_2_length_206_cov_6.194175	138	.	G	A	72.88	PASS	NS=8:AN=1:DP=176:AS=TCAAAGTGCGCCAAGCTCTGCTTCAGCTGCACGTTCTCCAGCCTCACGGC[G/A]CTCATCTCCTTCTCCTTCTTGTCCTCCAGGGCCTGGATCTGCTCCACCTC	GT:DP:GQ:EC:SG	1:8:21:8:A	0:5:42:0:G	0/1:25:48:9:R	0:45:165:0:G	0:29:114:0:G	0:18:65:0:G	0/1:42:89:20:R	0:4:39:0:G
1504_GGCCGTCTCTACGGACGGTAGTTAAACTCTGCCAG_NODE_2_length_292_cov_34.753426	257	.	C	T	103.75	PASS	NS=8:AN=1:DP=266	GT:DP:GQ:EC:SG	0/1:27:92:16:Y	1:7:18:7:T	1:18:51:18:T	0:82:221:0:C	0:40:147:0:C	0/1:27:76:10:Y	0:33:126:0:C	0/1:32:99:16:Y
636_GGCCGCTTTCCTTCAGCCGCCTTCTCCGAGAGCCC_NODE_4_length_159_cov_27.364780	128	.	T	C	34	PASS	NS=8:AN=1:DP=147	GT:DP:GQ:EC:SG	0/1:31:65:14:Y	0/1:4:1:2:T	0/1:21:39:16:Y	0/1:32:49:14:Y	0/1:29:36:11:Y	0/1:7:0:3:Y	0/1:21:49:11:Y	0:2:33:0:T
170_GGCCGCCTCGGGACGCTGCTCTGTCTGCTGCTCGC_NODE_2_length_281_cov_10.950178	30	.	C	T	12.17	PASS	NS=6:AN=1:DP=51	GT:DP:GQ:EC:SG	.:0:16:0:C	0/1:10:4:9:T	1:20:26:19:T	0/1:10:5:9:Y	1:2:3:2:T	1:1:5:1:C	1:8:30:8:T	.:0:0:0:.
6796_GGCCGCCTTCCCGGAAGGTTCCTGGGGAGAGGGGG_NODE_2_length_299_cov_11.204014	85	.	C	T	43.38	PASS	NS=8:AN=1:DP=159:AS=TCATTGATTCCAACTCATGTGTTGCAGAGTAGAACTGCGCTACATAGGGT[C/T]CTCATGGCTGTGACCTTTCAGAAGCAGATTGCCAGGCTTTTCTTCCATGG	GT:DP:GQ:EC:SG	1:6:15:6:T	1:55:100:55:T	1:47:105:47:T	0/1:12:16:11:T	1:17:48:17:T	1:3:6:3:T	1:16:51:16:T	1:3:6:3:T
1333_GGCCGCGTCTGCTTCCCAGGCGTGGGGACCCACCG_NODE_2_length_187_cov_7.887701	124	.	C	T	93.88	PASS	NS=8:AN=1:DP=181	GT:DP:GQ:EC:SG	0:17:78:0:C	0/1:8:30:3:Y	0:27:114:0:C	0:54:193:0:C	0:20:87:0:C	0:17:81:0:C	0:32:123:0:C	0:6:45:0:C
2928_GGCCGTTCTGCTGGGCTCTAGCTAGCCCTTCGTTT_NODE_2_length_312_cov_30.878204	33	.	G	T	24.5	PASS	NS=6:AN=1:DP=53	GT:DP:GQ:EC:SG	.:0:0:0:.	1:27:81:27:T	1:11:30:11:T	1:2:3:2:T	1:3:9:3:T	1:4:9:4:T	1:6:15:6:T	.:0:0:0:.
2816_GGCCGCTTACCTTCCAGGAGTCCCACCCCCAGCCT_NODE_2_length_193_cov_23.523315	129	.	T	C	68.25	PASS	NS=8:AN=1:DP=198:AS=TGTCTGAACATCTGCCCTGACTAAACCTAGTGGAACCTTCTGCAATTTCT[T/C]GTTGGCTTTTATGGTCCAATACACAAGAAGAAAAGTGTGCAAGGAGAGGG	GT:DP:GQ:EC:SG	0:17:78:0:T	0:8:51:0:T	0:3:36:0:T	0/1:34:82:15:Y	0/1:48:77:19:Y	0/1:33:87:16:Y	0/1:37:84:19:Y	1:18:51:18:C
9198_GGCCGACATCCTTTCTTTCATCCACACAGCGGTCT_NODE_2_length_242_cov_6.239669	112	.	T	C	90.88	PASS	NS=8:AN=1:DP=181	GT:DP:GQ:EC:SG	0/1:12:23:3:Y	0:44:168:0:T	0:32:123:0:T	0:36:116:0:T	0:18:90:0:T	0:16:78:0:T	0:11:63:0:T	0:12:66:0:T
4867_GGCCGACGCGTGGAGACCACGAGGCCTCTCCCTTC_NODE_2_length_291_cov_11.374571	280	.	T	G	45.75	PASS	NS=8:AN=1:DP=75	GT:DP:GQ:EC:SG	0:3:39:0:T	0:5:42:0:T	0:11:60:0:T	0:29:123:0:T	1:3:6:3:G	0:1:30:0:T	1:15:42:15:G	1:8:24:8:G
10652_GGCCGGGATTCCTCCAGTCTCAGTCAGACCATTAA_NODE_4_length_167_cov_6.155689	93	.	C	T	50.88	PASS	NS=8:AN=1:DP=170	GT:DP:GQ:EC:SG	0/1:31:14:5:C	0/1:8:26:4:Y	0:15:43:0:C	0:27:94:0:C	0/1:27:20:4:C	0:14:72:0:C	0:13:75:0:C	0/1:35:63:13:Y
973_GGCCGTGGCCTTTGCTTGAGAATGACGATAACAGC_NODE_2_length_339_cov_25.935102	240	.	G	T	94.62	PASS	NS=8:AN=1:DP=398:AS=CCCCTAACGACTGGTGTTTGAGAAGCAGAATAACACGAACAGTCAAGAGC[G/T]CAGCTAAAAGCAGAGACACGGACTTCAAAAAGACCTGAATTCCAGACCAG	GT:DP:GQ:EC:SG	0/1:27:81:12:K	1:19:54:19:T	1:61:147:61:T	0/1:112:87:45:K	0/1:54:93:23:K	1:27:78:27:T	1:73:145:73:T	1:25:72:25:T
4196_GGCCGCGCTGTGGTCCCACTAGTCTTGGATGGAGC_NODE_2_length_269_cov_12.557621	119	.	A	G	71.5	PASS	NS=8:AN=1:DP=153	GT:DP:GQ:EC:SG	1:13:36:13:G	0/1:27:83:10:R	1:13:42:13:G	0:27:108:0:A	0:30:123:0:A	0:9:54:0:A	1:24:69:24:G	0:10:57:0:A
10003_GGCCGTTTCCCCCGGAGAACTGCCTCGCCGTAGCC_NODE_2_length_182_cov_6.456044	97	.	T	G	64.5	PASS	NS=8:AN=1:DP=378	GT:DP:GQ:EC:SG	0/1:18:34:6:K	0/1:52:144:28:K	0/1:64:91:20:K	0/1:80:109:8:T	0/1:102:50:17:T	0:15:72:0:T	0/1:33:15:7:K	0/1:14:1:3:T
5075_GGCCGCGGACAAACTTAGTTCGCGAGTTCGCGAAC_NODE_2_length_301_cov_16.551495	174	.	T	C	114	PASS	NS=8:AN=1:DP=290:AS=AAATCAATATATTTAGCTTTCATGCTTTAACCATAACCGTTGTCAAAGAT[T/C]CTTGCAAAACCAATCCTAAAAATGGAATAAAAAGAGACACCTCGAGCCAG	GT:DP:GQ:EC:SG	0:13:66:0:T	0/1:29:68:14:Y	1:63:110:63:C	0:59:205:0:T	0:44:159:0:T	1:14:39:14:C	0:51:187:0:T	0:17:78:0:T
1945_GGCCGATTTTCCCAGCCCTGTTCTCACGTTTCTCA_NODE_2_length_329_cov_11.465046	93	.	A	G	45.38	PASS	NS=8:AN=1:DP=132:AS=TTGGGGGAGCCTGCTTGTCTGCTACAACCAGCCCTGGACGAGAGAGAAAC[A/G]GAGAGCCCTGCCCCCTGAGCACGGAACGTGAGGGCAAGAGGCAGGTCACC	GT:DP:GQ:EC:SG	1:14:39:14:G	1:12:33:12:G	1:43:114:43:G	1:21:60:21:G	1:13:36:13:G	1:5:15:5:G	1:21:60:21:G	1:3:6:3:G
117_GGCCGGAACAGACTAAGTACCTGCTGAATTCCAGG_NODE_2_length_281_cov_6.597865	159	.	T	C	117.75	PASS	NS=8:AN=1:DP=334	GT:DP:GQ:EC:SG	0/1:30:92:21:Y	0:95:227:0:T	0:47:143:0:T	0:40:150:0:T	0:51:181:0:T	0:9:54:0:T	0/1:59:86:26:Y	0/1:3:9:1:T
7364_GGCCGATTAAGAGCGAATCAATTAAAGAAATTCCA_NODE_2_length_275_cov_14.774546	238	.	T	C	48.75	PASS	NS=8:AN=1:DP=109	GT:DP:GQ:EC:SG	0:14:69:0:T	0/1:3:11:1:T	0/1:9:3:8:Y	0:35:135:0:T	0:16:75:0:T	1:4:9:4:C	0:27:82:0:T	1:1:6:1:T
3412_GGCCGCTGCGGAGCGCAAGACTGATGGGCTGACAC_NODE_2_length_166_cov_25.602409	77	.	A	G	104.38	PASS	NS=8:AN=1:DP=279:AS=AGGAGTGAGCCACAGAACCAAGTTTCTCATCCACCTTAAGATATAAATAT[A/G]TACTTGATGCCCCAAAGCCTGGGGGCTACATCTGAGGCGCTGTACCACTT	GT:DP:GQ:EC:SG	0/1:30:114:17:R	0:10:57:0:A	0:12:63:0:A	0/1:58:60:17:R	0/1:50:109:30:R	0:43:156:0:A	0:50:178:0:A	0/1:26:98:12:R
6189_GGCCGAGTCCCCTGGCTCCACAGGCTGGATCTTCA_NODE_2_length_149_cov_20.154362	110	.	T	C	44.5	PASS	NS=8:AN=1:DP=259	GT:DP:GQ:EC:SG	0/1:32:67:19:Y	0/1:8:26:6:Y	0/1:21:56:11:Y	0/1:84:52:33:Y	0/1:65:45:27:Y	0/1:26:42:10:Y	1:12:33:12:C	0/1:11:35:7:Y
2178_GGCCGAGCTGGCCCCAGGCACTCACCGTAAATGGG_NODE_2_length_317_cov_9.949527	259	.	C	T	90.88	PASS	NS=8:AN=1:DP=193	GT:DP:GQ:EC:SG	0:14:69:0:C	0:14:69:0:C	0:44:135:0:C	0:46:165:0:C	0/1:24:84:12:Y	0:16:75:0:C	0:31:126:0:C	0/1:4:4:2:Y
282_GGCCGGAGTGGCTAATCGGAGGCCGGAGGTGGCCG_NODE_2_length_262_cov_13.000000	255	.	C	G	17.12	PASS	NS=8:AN=1:DP=48	GT:DP:GQ:EC:SG	1:3:6:3:G	1:1:5:1:C	1:6:15:6:G	1:10:27:10:G	1:9:27:9:G	1:5:12:5:G	1:11:36:11:G	1:3:9:3:G
10950_GGCCGTTTTGAGCGGCTTGCTTTTTCTCCTGGTAG_NODE_4_length_170_cov_8.323529	19	.	C	G	49	PASS	NS=6:AN=1:DP=42	GT:DP:GQ:EC:SG	0:2:33:0:C	0:12:63:0:C	0/1:8:57:5:S	0:12:63:0:C	.:0:0:0:.	0:6:45:0:C	.:0:0:0:.	0:2:33:0:C
5327_GGCCGGTTCCGCAGAGCCCTCCATTTTACCCGTGG_NODE_2_length_216_cov_5.384259	24	.	T	A	22.75	PASS	NS=8:AN=1:DP=36	GT:DP:GQ:EC:SG	0:5:42:0:T	0/1:6:28:3:W	0:4:39:0:T	0/1:9:5:2:T	0:1:30:0:T	0/1:3:6:1:T	0/1:7:2:2:W	0:1:30:0:T
2456_GGCCGGGTCCACCGCAGGGAACAAGCCTGTAGGGA_NODE_2_length_166_cov_19.692772	100	.	A	C	69.75	PASS	NS=8:AN=1:DP=777	GT:DP:GQ:EC:SG	0/1:43:68:32:M	0/1:57:85:33:M	0/1:112:37:84:M	0/1:192:91:124:M	0/1:136:69:93:M	0/1:78:89:46:M	0/1:128:80:85:M	0/1:31:39:25:M
5816_GGCCGTGTCCTCAGGATTCACAGAGGTCAGTTGTA_NODE_6_length_143_cov_9.706294	104	.	C	G	44.5	PASS	NS=8:AN=1:DP=110	GT:DP:GQ:EC:SG	0:7:48:0:C	0/1:26:64:2:C	0:23:64:0:C	0/1:20:32:5:S	0/1:10:32:4:S	0:9:54:0:C	0/1:9:17:1:C	0:6:45:0:C
4604_GGCCGGGGACGCCTGGCAGGGCAGCGGGGGCACGA_NODE_2_length_187_cov_6.679144	46	.	T	G	34.88	PASS	NS=8:AN=1:DP=100	GT:DP:GQ:EC:SG	1:5:12:5:G	1:10:27:10:G	1:24:69:24:G	1:19:54:19:G	1:15:42:15:G	1:3:6:3:G	1:22:66:22:G	1:2:3:2:G
1246_GGCCGCGGGCGGCAAGGAGGCGGGCCCGGANCCTG_NODE_2_length_244_cov_5.950819	118	.	A	G	147.38	PASS	NS=8:AN=1:DP=3289	GT:DP:GQ:EC:SG	0/1:311:87:84:A	1:410:214:410:G	1:510:212:508:G	0/1:670:30:230:A	0/1:632:26:213:R	1:188:173:188:G	1:437:214:437:G	0:131:223:0:A
3822_GGCCGCGTAGGTGGGCCGGACCTGTATCTCTCGTG_NODE_2_length_329_cov_25.978724	183	.	A	G	132	PASS	NS=8:AN=1:DP=366	GT:DP:GQ:EC:SG	0:30:117:0:A	0/1:54:111:28:R	1:56:146:56:G	0:82:222:0:A	0/1:46:111:25:R	0:27:108:0:A	1:56:151:56:G	0/1:15:90:9:R
4604_GGCCGGGGACGCCTGGCAGGGCAGCGGGGGCACGA_NODE_2_length_187_cov_6.679144	11	.	G	A	14	PASS	NS=6:AN=1:DP=32	GT:DP:GQ:EC:SG	.:0:0:0:.	1:7:18:7:A	1:7:18:7:A	1:8:21:8:A	1:1:0:1:A	.:0:0:0:.	1:8:21:8:A	1:1:6:1:G
9731_GGCCGTCCGCGGTCTTGGGTCTCATTCCAGCCCCT_NODE_2_length_165_cov_13.666667	104	.	A	G	36.29	PASS	NS=7:AN=1:DP=100	GT:DP:GQ:EC:SG	0/1:7:29:1:A	0:10:57:0:A	0/1:35:66:16:R	0/1:9:34:7:R	0/1:12:10:3:A	0/1:8:0:3:A	0/1:19:58:12:R	.:0:0:0:N
1206_GGCCGCGTGTTGGGCTCGGGGTTCTGATCACAGAG_NODE_2_length_281_cov_10.049822	179	.	T	C	109.5	PASS	NS=8:AN=1:DP=279:AS=GGAGTACTACAGTATCTTCAAATAAACAGAATCTAACGGCCAAATTCAAT[T/C]CGAACTCGACCGTACAAAGCTCTCGCTAACCCACTTCTAAACTACCTACC	GT:DP:GQ:EC:SG	1:20:57:20:C	0:35:132:0:T	0/1:64:72:32:Y	0:47:168:0:T	0:40:147:0:T	0:18:81:0:T	0:39:144:0:T	0:16:75:0:T
538_GGCCGGTACTCTCTGGGTGACAGCAGGAAATGCAG_NODE_2_length_289_cov_17.619377	93	.	G	A	73.5	PASS	NS=8:AN=1:DP=240:AS=CTCTGATTCCTGTAGAGTTACCTGTTGCTGTCAAGTCGATTCTGACTCAT[G/A]GTGACCCTATAGAACTGAGTAGAACTGCCCCATAGAGTTTCCAGGGAGCA	GT:DP:GQ:EC:SG	1:13:36:13:A	0/1:63:88:32:R	1:30:87:30:A	0/1:40:74:15:R	0:39:147:0:G	1:17:48:17:A	1:36:105:36:A	1:2:3:2:A
4372_GGCCGGCGCGCTGGCGCTGACGGCGGGCGGGAATG_NODE_2_length_322_cov_7.726708	97	.	T	C	110.62	PASS	NS=8:AN=1:DP=319	GT:DP:GQ:EC:SG	0/1:25:40:8:Y	0:66:226:0:T	0:63:217:0:T	0:43:156:0:T	0:42:153:0:T	0:16:47:0:T	0/1:45:13:8:T	0/1:19:33:6:Y
8855_GGCCGCGTCGGGCGTGGGCCTCCGCTTCCTCCCGC_NODE_2_length_274_cov_7.726277	128	.	T	C	55.25	PASS	NS=8:AN=1:DP=100	GT:DP:GQ:EC:SG	0:3:36:0:T	0/1:24:25:8:Y	0:6:45:0:T	0:21:90:0:T	0:16:75:0:T	0:6:45:0:T	0:18:81:0:T	0:6:45:0:T
10769_GGCCGGAGACAGCGCTCCAGGGTCCCCTCCCTGGG_NODE_2_length_185_cov_4.513514	110	.	T	C,G	74.75	PASS	NS=8:AN=2:DP=143:AS=CATATGTGACTCGCGTTTCTAGCTTACATTATACTTCCATTGGACAGCGC[T/C,G]GAGTTAGACTGTTGAATGTATTTATTTCAGCCCGGGATTTCGGGAGGCTT	GT:DP:GQ:EC:SG	0:7:48:0:T	0:41:150:0:T	0:37:138:0:T	0/1/2:12:46:1,5:K	2:22:63:22:G	0:11:60:0:T	0:12:63:0:T	0:1:30:0:T
8492_GGCCGTGACCTAGGGTCACGACCTTGCTTGTATGC_NODE_2_length_307_cov_26.413681	115	.	A	G	31	PASS	NS=8:AN=1:DP=844	GT:DP:GQ:EC:SG	0/1:51:50:27:R	0/1:188:12:138:A	0/1:165:10:119:R	0/1:118:12:93:A	0/1:112:34:74:R	0/1:44:44:32:R	0/1:127:38:83:R	0/1:39:48:27:R
4612_GGCCGCAGTTTCCTCAGGAAGAAGCAGCCAGGCGC_NODE_2_length_310_cov_4.264516	187	.	C	A	24	PASS	NS=8:AN=1:DP=71	GT:DP:GQ:EC:SG	0:7:48:0:C	0/1:9:9:2:C	0/1:6:0:2:M	0/1:26:62:2:C	0/1:6:5:3:M	0/1:7:2:2:C	0/1:6:27:4:M	0:4:39:0:C
10031_GGCCGTGTACCTCTGTGCCAGCAGCTTAGACACAG_NODE_1_length_159_cov_21.735849	130	.	T	C	30.88	PASS	NS=8:AN=1:DP=95	GT:DP:GQ:EC:SG	0/1:2:8:1:T	0/1:38:7:10:Y	0/1:12:29:6:Y	0:17:78:0:T	0:15:49:0:T	0/1:7:40:5:Y	1:3:6:3:C	0:1:30:0:T
7221_GGCCGCTGTCGCCGTTGTGTTCCGTTCTCTTGAGG_NODE_2_length_290_cov_13.368965	69	.	C	A	37	PASS	NS=7:AN=1:DP=97:AS=TAAACCAGACCCTTGGTTAAGACTTCAATGGCTGCCCAAGGGCTAAATCC[C/A]AACTTCTCGGCGTCGCTTACAGGCTCTTCAAGGCCCACGAGAACCCACGC	GT:DP:GQ:EC:SG	1:11:30:11:A	1:22:63:22:A	1:29:84:29:A	0/1:12:17:11:A	1:12:36:12:A	1:1:2:1:A	1:10:27:10:A	.:0:0:0:.
8064_GGCCGTCATGGCGCTGCAGGAGGCGTGCGAGGCCT_NODE_3_length_283_cov_11.816255	109	.	T	C	87.88	PASS	NS=8:AN=1:DP=201	GT:DP:GQ:EC:SG	0:14:69:0:T	0:44:159:0:T	0:52:184:0:T	0:28:111:0:T	0/1:25:15:4:T	0:8:51:0:T	1:24:69:24:C	0:6:45:0:T
1468_GGCCGGGCAGAGCTGCGTTCAGCTTCACAGCCAGG_NODE_3_length_240_cov_15.979167	91	.	C	G	82.12	PASS	NS=8:AN=1:DP=1047	GT:DP:GQ:EC:SG	0/1:141:109:21:C	0/1:37:10:6:C	0/1:148:111:24:C	0/1:267:61:66:C	0/1:163:137:26:C	0/1:110:78:19:C	0/1:139:97:22:C	0/1:42:54:12:S
9098_GGCCGGCGAGGGAGGCGCCTTATGTAACCCGCGGG_NODE_2_length_234_cov_4.098290	23	.	G	A	34.5	PASS	NS=6:AN=1:DP=26	GT:DP:GQ:EC:SG	.:0:0:0:.	0/1:10:24:3:R	0:4:39:0:G	0:6:45:0:G	0:3:36:0:G	0:1:30:0:G	0:2:33:0:G	.:0:0:0:.
32_GGCCGTTAACTGAAAAGTTGGAGATTCAAGTCCAC_NODE_2_length_308_cov_14.321428	42	.	G	A	17.12	PASS	NS=8:AN=1:DP=98	GT:DP:GQ:EC:SG	0/1:9:8:2:R	0/1:22:13:4:R	0/1:14:18:3:R	0:20:54:0:G	0/1:17:9:3:R	0/1:5:9:1:G	0/1:9:23:1:G	1:2:3:2:A
3252_GGCCGCCGGCTCCTAAGTCCCTGGGGGCTCTGCTG_NODE_2_length_376_cov_13.074468	114	.	A	T,C	15.38	PASS	NS=8:AN=2:DP=106	GT:DP:GQ:EC:SG	0/2:5:10:3:M	0/1/2:34:30:10,12:M	0/1/2:31:6:10,7:W	0/1/2:9:3:1,2:M	0/1/2:7:7:1,2:M	0/2:5:5:2:M	0/1/2:14:32:2,4:M	0:1:30:0:A
6132_GGCCGCTTTGGGCGAGGATGAAGAGGGGCTGCCGG_NODE_2_length_183_cov_7.814208	85	.	C	A	44.38	PASS	NS=8:AN=1:DP=92:AS=AAGAGCAGGAACCAAAAGGAAAATTTCCATCAATGTGAATATCACGCTCA[C/A]GCTTTGGGAAATGGGGAGGGGGAGGGGAGAAAATTAGGGGGTTGGCAGAG	GT:DP:GQ:EC:SG	0/1:7:3:2:C	1:2:3:2:A	0/1:7:37:5:M	0:27:108:0:C	0/1:12:63:6:M	0:15:75:0:C	1:21:66:21:A	1:1:0:1:A
8251_GGCCGGCCCCGGGCTCTCACTCTAGATGGGGCTGG_NODE_2_length_184_cov_7.559783	169	.	G	C	45.67	PASS	NS=6:AN=1:DP=47	GT:DP:GQ:EC:SG	0/1:6:37:4:S	.:0:0:0:N	0:4:39:0:G	0:18:81:0:G	0/1:7:27:5:S	0:4:39:0:G	0:8:51:0:G	.:0:0:0:N
2803_GGCCGGGAACTTGTCAGCGGACTTTGGGGCGCTCG_NODE_2_length_291_cov_9.563574	26	.	C	G	14.57	PASS	NS=7:AN=1:DP=38	GT:DP:GQ:EC:SG	.:0:0:0:.	1:15:42:15:G	1:7:18:7:G	1:8:21:8:G	1:2:3:2:G	1:1:6:1:C	1:4:9:4:G	1:1:3:1:C
5692_GGCCGACTGAACGGCGAGCCCGTGGGCAGGCGACA_NODE_2_length_324_cov_11.885802	250	.	T	G	63.25	PASS	NS=8:AN=1:DP=200	GT:DP:GQ:EC:SG	1:27:78:27:G	1:10:30:10:G	1:22:66:22:G	0:53:187:0:T	0/1:30:47:13:K	0/1:11:13:2:T	0/1:35:58:17:K	0/1:12:27:5:K
1797_GGCCGACCCGTCCAGCAGGGTGCCGGCAACCACTT_NODE_2_length_303_cov_28.412540	71	.	C	T	88.62	PASS	NS=8:AN=1:DP=175:AS=TTAGTGAGGATGTGAAGCAAACGGATTACTGGTGGGTGTGTAAACTAACA[C/T]AAGCACTTTGTAGAAGTATTTTTCAGTATCTTTTAAAGCAGAACATATGC	GT:DP:GQ:EC:SG	0/1:12:21:3:Y	0:51:181:0:C	0:24:105:0:C	0:33:129:0:C	0:22:93:0:C	0:7:48:0:C	0:25:102:0:C	0:1:30:0:C
10791_GGCCGAGTGCAGGGCGGATTGGCTGCGTTAAGAAG_NODE_2_length_275_cov_18.712727	137	.	T	C	149.25	PASS	NS=8:AN=1:DP=429	GT:DP:GQ:EC:SG	0:32:126:0:T	0:85:224:0:T	0:49:175:0:T	0/1:53:58:17:Y	0:82:220:0:T	0/1:32:88:16:Y	0:76:216:0:T	0:20:87:0:T
10660_GGCCGATCAGGGCATTTTTAGGAATGTTTTCGAGC_NODE_2_length_149_cov_18.000000	47	.	G	A	38.62	PASS	NS=8:AN=1:DP=111	GT:DP:GQ:EC:SG	1:9:24:9:A	1:21:60:21:A	1:19:54:19:A	1:15:42:15:A	1:17:48:17:A	1:5:12:5:A	1:20:57:20:A	1:5:12:5:A
4100_GGCCGAGGCGGCGCATGCGCGGCCTCTGAGCGCTG_NODE_2_length_305_cov_18.029509	286	.	G	T	53.14	PASS	NS=7:AN=1:DP=86	GT:DP:GQ:EC:SG	0:6:45:0:G	.:0:0:0:.	0:11:60:0:G	0:24:102:0:G	0:10:57:0:G	0/1:4:3:2:K	0/1:21:48:10:K	0:10:57:0:G
9384_GGCCGGGCCTGCGGAAGGCGTCCCGGTCACGTGGG_NODE_2_length_293_cov_16.453924	164	.	T	C	141	PASS	NS=8:AN=1:DP=333:AS=TACTTGTGACGCCACTGGTTAGATGAGACTGAATACATCCCCCAATGACT[T/C]TGGCAACAAGGACACTGATGTCCTTATCAAGGACATTTTTAGGTGAGTGA	GT:DP:GQ:EC:SG	0:25:102:0:T	0:29:114:0:T	0:52:187:0:T	0:82:208:0:T	0:55:193:0:T	1:28:84:28:C	0:44:159:0:T	0:18:81:0:T
2346_GGCCGCCGTCTCTCCGCACGCTGCCACGCGCAAGG_NODE_2_length_251_cov_5.250996	84	.	T	C	53.25	PASS	NS=8:AN=1:DP=152	GT:DP:GQ:EC:SG	0/1:17:76:10:Y	0/1:34:89:20:Y	0/1:33:60:25:Y	0/1:22:88:13:Y	0/1:20:27:17:Y	0/1:8:37:4:Y	0/1:17:40:13:Y	1:1:9:1:T
9833_GGCCGGCTCGACCCACGACCACAGGGCACCCCAGC_NODE_2_length_288_cov_6.250000	50	.	T	A	17.12	PASS	NS=8:AN=1:DP=56	GT:DP:GQ:EC:SG	1:1:1:1:T	1:14:42:14:A	1:19:40:18:A	0/1:7:12:6:W	1:7:18:7:A	1:4:9:4:A	1:3:6:3:A	1:1:9:1:T
3730_GGCCGCGCTCACGGTGGGGCACCGCTTCCCCTTCC_NODE_2_length_298_cov_9.513423	50	.	A	G	33.57	PASS	NS=7:AN=1:DP=57	GT:DP:GQ:EC:SG	.:0:0:0:.	0:17:78:0:A	0/1:11:18:2:A	0:6:45:0:A	0/1:10:56:6:R	0/1:4:16:2:R	1:8:21:8:G	1:1:1:1:A
3528_GGCCGGAGCGCGTCTGCCTGGGCAGCACCGCCACC_NODE_2_length_297_cov_4.872054	222	.	G	A	75	PASS	NS=7:AN=1:DP=164:AS=TGCAGCCTTGGAAATCTTATGTGGGCAGTTCTACTCTGTCCTATAGGGCG[G/A]CTGGGAAGGGGCTGGAGCTGCCAGGGCTCCGGAGAAACAATCCCACCCTT	GT:DP:GQ:EC:SG	0:2:33:0:G	.:0:0:0:.	0:3:36:0:G	0:35:132:0:G	1:52:118:52:A	0/1:18:19:6:R	0:50:178:0:G	1:4:9:4:A
11085_GGCCGCAGGGGGTCCGGCGCCGCCTCACTACTGCC_NODE_2_length_232_cov_13.530172	54	.	T	A	12.62	PASS	NS=8:AN=1:DP=35	GT:DP:GQ:EC:SG	1:1:4:1:T	1:4:9:4:A	1:10:27:10:A	1:11:30:11:A	1:2:3:2:A	1:1:12:1:T	1:5:12:5:A	1:1:4:1:T
6576_GGCCGTCCGGACCCTGCCTCCCCAGTACGTTGTTG_NODE_3_length_159_cov_6.327044	55	.	T	A	35.57	PASS	NS=7:AN=1:DP=83:AS=ACAGTCCCTGTGTTCATAGGGTTTCCCTCCAGTGCTGTTGTGTATTTCTG[T/A]GTGGATGAAGGCAAGGTGAAGGTTTTCCCACGTTCCTGGTGACAGGGTTT	GT:DP:GQ:EC:SG	1:1:3:1:T	1:38:111:38:A	1:21:63:21:A	1:4:9:4:A	1:3:9:3:A	1:2:6:2:A	1:14:48:14:A	.:0:0:0:.
7821_GGCCGGTGCCTGCTGACCAGAGGGCTGGGAGGCGG_NODE_2_length_348_cov_17.735632	192	.	C	G	70.38	PASS	NS=8:AN=1:DP=224:AS=ATACAGAAACGTACTATGTTAAATTAATATGACAAAAATCAAAATTTTTC[C/G]TACATGAGATTAAAAGATCATCCTGAAAAGGGAGCAGAGGGCTGGCCTAA	GT:DP:GQ:EC:SG	1:17:48:17:G	1:39:114:39:G	1:36:105:36:G	0/1:36:57:11:S	0/1:32:86:15:S	1:18:51:18:G	0/1:35:72:13:S	1:11:30:11:G
6532_GGCCGGTACTGTCGGCCTGACCATGAGTGAATCCC_NODE_2_length_289_cov_12.498270	27	.	G	A	33.25	PASS	NS=8:AN=1:DP=68	GT:DP:GQ:EC:SG	0:3:36:0:G	0/1:19:32:5:R	0:21:90:0:G	0:3:36:0:G	0/1:2:5:1:R	0:4:39:0:G	0/1:14:24:4:R	0/1:2:4:1:G
8351_GGCCGAGAAGCCCTGGGGCCCCCAGGCCGAGACTA_NODE_2_length_302_cov_7.860927	233	.	G	A	75.25	PASS	NS=8:AN=1:DP=254	GT:DP:GQ:EC:SG	0/1:19:42:8:R	1:35:95:35:A	0/1:55:57:21:R	0:46:168:0:G	0/1:26:23:9:R	0/1:20:4:4:G	0:47:168:0:G	0:6:45:0:G
4969_GGCCGAGGAAGGGGCAGATCGTAGTGACCTGAGAA_NODE_2_length_291_cov_11.092784	249	.	G	A	85.25	PASS	NS=8:AN=1:DP=159:AS=ACTCGCCTTTTCTTTTTGATTTCATCATTGTAAGCTTAAAAAGTACCTTC[G/A]TCCTCTATCAATAAATTTGAAAAACATTCACTTGTGTTTTACTTTTTTTT	GT:DP:GQ:EC:SG	0/1:6:31:3:R	0:13:66:0:G	0:36:135:0:G	0:37:138:0:G	0:12:63:0:G	0:14:69:0:G	0:32:126:0:G	0:9:54:0:G
4833_GGCCGTGGGTGATCCAGGGGGGTGACTCTATCCTT_NODE_2_length_212_cov_10.698113	50	.	A	T	6	q10	NS=7:AN=1:DP=18	GT:DP:GQ:EC:SG	1:2:3:2:T	1:1:9:1:A	1:4:9:4:T	1:2:3:2:T	1:3:6:3:T	1:3:6:3:T	1:3:6:3:T	.:0:0:0:N
1905_GGCCGCTTGGTAGGAGAACTGTCGATCGGGCCCGG_NODE_2_length_325_cov_12.655385	268	.	T	G	91.88	PASS	NS=8:AN=1:DP=277	GT:DP:GQ:EC:SG	0:27:66:0:T	0/1:14:61:8:K	0:20:71:0:T	0:67:171:0:T	0:58:135:0:T	0/1:26:19:7:K	0:51:137:0:T	0:14:75:0:T
3634_GGCCGCCCTCTCGTGGCCAGTGGGGAGGAGCGCAA_NODE_2_length_280_cov_12.817857	118	.	A	C	45.5	PASS	NS=8:AN=1:DP=111	GT:DP:GQ:EC:SG	1:8:21:8:C	1:8:21:8:C	1:6:15:6:C	0:51:181:0:A	0:14:60:0:A	1:5:12:5:C	1:18:54:18:C	1:1:0:1:M
9189_GGCCGGGACCTAATCTTAGGTGTCTTCTCCGCTAC_NODE_2_length_264_cov_5.761364	193	.	A	C	86.62	PASS	NS=8:AN=1:DP=173:AS=GCCCCTACGGGCCAGAAACACCCCTTCCAGCCGGGGGCCGCGCGTCCCAG[A/C]GCCGACCGTCGCCTGTCACACTGCTGGTCAGGGTTCCCCTCTCCAAACGT	GT:DP:GQ:EC:SG	1:22:63:22:C	0:17:81:0:A	0/1:18:66:9:M	0:42:153:0:A	0:16:75:0:A	0:18:81:0:A	0:23:96:0:A	0:17:78:0:A
2982_GGCCGCGTGGACGAGCCGCCCTCTTTCGCGGCCAA_NODE_2_length_342_cov_9.944445	304	.	C	T	92.62	PASS	NS=8:AN=1:DP=202	GT:DP:GQ:EC:SG	0:26:105:0:C	0:3:36:0:C	0:30:120:0:C	0:42:156:0:C	0/1:31:30:13:Y	0:12:63:0:C	0:43:159:0:C	0:15:72:0:C
7419_GGCCGGGTGTTTGCATAGAACGTTATCCGCTGAAT_NODE_2_length_176_cov_9.522727	29	.	G	C	81	PASS	NS=8:AN=1:DP=511	GT:DP:GQ:EC:SG	0/1:21:20:4:S	0:159:196:0:G	0/1:99:41:15:G	0/1:59:71:5:G	0/1:60:45:14:S	0/1:16:12:2:G	0:83:194:0:G	0:14:69:0:G
167_GGCCGCGGACGGCAAGGAGGCGGGCCCGGAGCCTG_NODE_1_length_396_cov_35.785355	401	.	A	C	33.62	PASS	NS=8:AN=1:DP=869	GT:DP:GQ:EC:SG	0/1:363:27:141:M	0:4:42:0:A	0/1:33:35:13:M	0/1:140:1:46:M	0/1:86:30:33:M	0/1:77:53:34:M	0/1:48:59:26:M	0/1:118:22:41:M
4581_GGCCGAATCTGGTCCTCTGCCTCACGTATACTAAA_NODE_2_length_283_cov_15.696113	271	.	C	T	33.5	PASS	NS=6:AN=1:DP=33	GT:DP:GQ:EC:SG	0:2:33:0:C	.:0:0:0:.	1:7:18:7:T	0:18:81:0:C	.:0:30:0:C	0:2:33:0:C	1:2:3:2:T	0:2:33:0:C
7949_GGCCGGGGGAGGGGCGAGCAGAGCCCACGGGTCGT_NODE_2_length_333_cov_11.399400	45	.	A	T	25.67	PASS	NS=6:AN=1:DP=58	GT:DP:GQ:EC:SG	.:0:0:0:.	1:35:102:35:T	1:7:18:7:T	0/1:7:10:6:W	1:5:12:5:T	1:1:6:1:A	1:3:6:3:T	.:0:0:0:.
1837_GGCCGGCCCGGCATCAGCCCCTCCAGCCCCGGCAG_NODE_2_length_284_cov_4.327465	166	.	G	C	64.12	PASS	NS=8:AN=1:DP=164:AS=CTTATCACCCCCGGGAACTTTGGGAGCCTGGGGAGGATGGAGCCAAGCCA[G/C]TGTGCAGGGTGGAGAAGTGGGCAGACGGCGGCCTTCCTTTCACAGGGCCT	GT:DP:GQ:EC:SG	0:13:66:0:G	1:38:111:38:C	1:24:72:24:C	0/1:36:70:17:S	0/1:16:66:10:S	0:10:57:0:G	0/1:24:65:10:S	1:3:6:3:C
7412_GGCCGCTCACCCTCGAGATCGCTAGCTCAAGCAAG_NODE_2_length_282_cov_12.875887	79	.	T	A	80.5	PASS	NS=8:AN=1:DP=149:AS=CCACACGCTTACCTTAGGGAAACAACCTGCACTTTATAATGACACGAATA[T/A]GGTTTGGTGTGACAGAAGGATAATGATAACTGAGGCCGGAGGCGTAACCC	GT:DP:GQ:EC:SG	0:8:51:0:T	0:38:141:0:T	0:19:84:0:T	0:39:144:0:T	1:18:57:18:A	0/1:9:59:6:W	0:14:69:0:T	0:4:39:0:T
10721_GGCCGGGGGTTTGGGGAAGATGGTCGCTTTTCCGG_NODE_2_length_209_cov_12.559809	199	.	G	C	17.83	PASS	NS=6:AN=1:DP=23	GT:DP:GQ:EC:SG	1:4:12:4:C	.:0:0:0:.	.:0:0:0:.	0:5:42:0:G	0/1:8:1:2:G	1:1:13:1:G	0:2:33:0:G	1:3:6:3:C
2200_GGCCGCAGTTGACATGGCAACTTGGCCAGTAGGAG_NODE_2_length_234_cov_8.034188	179	.	A	G	42	PASS	NS=8:AN=1:DP=76:AS=CACGGTCCTGAACATCGCTCATTACTAAACACAGTGCTTTGAGGGAAAGA[A/G]AGGAAATGAACAATAAGAACAACCCACCAAACCAAAAACCAACCTGCTGT	GT:DP:GQ:EC:SG	1:4:9:4:G	0:19:84:0:A	1:2:3:2:G	0:25:102:0:A	1:16:48:16:G	0:2:33:0:A	0:7:51:0:A	1:1:6:1:A
9261_GGCCGTGTACCTCTGTGCCAGCACCTTAGCCACAG_NODE_2_length_305_cov_17.413115	190	.	T	C	126.88	PASS	NS=8:AN=1:DP=390	GT:DP:GQ:EC:SG	0:8:51:0:T	0:48:171:0:T	0/1:86:89:53:Y	0:68:216:0:T	0:58:202:0:T	0:15:72:0:T	1:89:144:89:C	0/1:18:70:8:Y
7440_GGCCGGCTGCTCCCAAGTCCCTGGGGGCTCAGCTG_NODE_2_length_316_cov_16.417721	238	.	C	A,G	37.75	PASS	NS=8:AN=2:DP=218	GT:DP:GQ:EC:SG	0/2:22:11:20:G	0/2:6:16:5:S	0/1/2:26:1:2,21:S	2:43:77:40:G	2:50:61:47:G	0/2:14:30:10:S	2:38:87:37:G	2:19:19:17:G
7194_GGCCGGTACTAACGTCCCGAGTCAGTCAGAGCTCC_NODE_5_length_150_cov_16.440001	72	.	A	G	68.25	PASS	NS=8:AN=1:DP=371:AS=CCCTCGCTACCCCACTGGGAGCACGCGGGGTTGCATACTCTCTGACAGCC[A/G]GGCCGTGGTTGTCTCCTTTGTCTGCAGCTGGAGAGGGGAATGCAACTCAC	GT:DP:GQ:EC:SG	0/1:47:63:17:R	0/1:13:61:9:R	0/1:48:64:22:R	0/1:81:79:43:R	0/1:59:74:26:R	0/1:50:71:32:R	0/1:56:70:38:R	0/1:17:64:10:R
3374_GGCCGGGACTCGGCGTCTGGCTCCCAGGAGCCATC_NODE_2_length_278_cov_4.503597	276	.	G	A	22.75	PASS	NS=8:AN=1:DP=37	GT:DP:GQ:EC:SG	0:1:30:0:G	0/1:2:15:1:G	0/1:3:7:2:R	0/1:17:45:2:G	0/1:6:10:2:G	0:3:36:0:G	1:4:9:4:A	0:1:30:0:G
3952_GGCCGGCAGTCGGAGGCAGAAGTGACCTCGGCGAC_NODE_2_length_319_cov_7.134796	44	.	A	C	25.71	PASS	NS=7:AN=1:DP=66	GT:DP:GQ:EC:SG	.:0:0:0:.	1:29:84:29:C	1:8:24:8:C	1:13:36:13:C	1:6:15:6:C	1:3:6:3:C	1:6:15:6:C	1:1:0:1:M
10011_GGCCGCAGCCCCCGCCTGGGTCCGGCTCCGGAGAG_NODE_2_length_381_cov_14.454068	88	.	T	C	35.83	PASS	NS=6:AN=1:DP=72:AS=CATTTTAACTGTTCATCTGCTAAATAATTTAAGCAAACAAACAAAAGACA[T/C]GCAAAATAAAGCATAACTTTTCTCTTTGCGCCATGCATTTAAGGCTGCCA	GT:DP:GQ:EC:SG	.:0:0:0:.	0/1:21:56:7:Y	1:31:90:31:C	0/1:4:8:1:T	0/1:6:37:3:Y	1:4:9:4:C	1:6:15:6:C	.:0:0:0:.
7025_GGCCGTGAACTGGGGTGGGCGAAGGTGGGAGATGG_NODE_2_length_201_cov_7.139304	146	.	T	C	59.75	PASS	NS=8:AN=1:DP=138:AS=ATTCCGTTGTCCCATGAGAAATAAAAGCAGAAAACCAACAAGTCCTGACC[T/C]CCAGATCCGCCTTGCTCTTATTCCCAGGCACCCTCCCCTCAGAAACGCAG	GT:DP:GQ:EC:SG	0/1:16:35:6:Y	1:25:72:25:C	1:12:36:12:C	0:32:123:0:T	0/1:19:59:9:Y	0:4:39:0:T	1:27:78:27:C	0:3:36:0:T
9643_GGCCGGTACATGACTTTGCAAACCTGCATTTCCAT_NODE_2_length_236_cov_16.877119	195	.	A	C	83.12	PASS	NS=8:AN=1:DP=247:AS=ATCAGAAAAAGGAAAGAAACAGGAGCGGGGAGGGGAGATGAGAGTCAGGA[A/C]AAGAAAAAAGTAGTGCGCATGTGTGCGACTGTGCGTTGGCTCTCCGTGTA	GT:DP:GQ:EC:SG	0:19:84:0:A	0/1:3:9:2:M	0:34:105:0:A	0/1:79:67:38:M	0/1:28:58:18:M	0:16:78:0:A	0:39:144:0:A	0:29:120:0:A
8318_GGCCGTGTCTCCTCGAGCCCGGAAAGCCCTCTGCA_NODE_2_length_191_cov_5.596859	25	.	A	C	24.33	PASS	NS=6:AN=1:DP=22	GT:DP:GQ:EC:SG	.:0:0:0:.	0/1:8:29:1:A	1:4:9:4:C	0:3:36:0:A	0:3:36:0:A	.:0:0:0:.	1:2:3:2:C	0:2:33:0:A
3644_GGCCGCCGTGGCAGGCTGCATTTCACCACCAGGGG_NODE_2_length_270_cov_12.948148	246	.	T	A	46.29	PASS	NS=7:AN=1:DP=70	GT:DP:GQ:EC:SG	0:16:75:0:T	.:0:0:0:N	0:8:51:0:T	0:14:69:0:T	0:11:60:0:T	0/1:7:0:2:W	0/1:11:33:5:W	0:3:36:0:T
9549_GGCCGCGTACAGCGCCATGCTCCGCCGCGCGCGTT_NODE_2_length_314_cov_6.238853	302	.	A	G	26.57	PASS	NS=7:AN=1:DP=36	GT:DP:GQ:EC:SG	1:7:18:7:G	1:1:9:1:A	.:0:0:0:.	0:13:66:0:A	0:2:33:0:A	1:2:3:2:G	0:6:45:0:A	1:5:12:5:G
3004_GGCCGCGGCTTCTACTCCTTCAGACTAAACCACGG_NODE_2_length_296_cov_14.871622	277	.	T	C	37	PASS	NS=8:AN=1:DP=68	GT:DP:GQ:EC:SG	0:1:30:0:T	1:7:18:7:C	0/1:9:54:6:Y	0/1:12:23:4:Y	0/1:8:35:5:Y	1:9:24:9:C	0:16:78:0:T	0/1:6:34:4:Y
495_GGCCGTGGGGCGTTGCCTTTGCTCTTCTTCCACTT_NODE_2_length_292_cov_12.845890	90	.	C	T	15.86	PASS	NS=7:AN=1:DP=30:AS=AACCAACATGCCCATAAAGGGGTGAATGCGTAAATTATGGTATACATTCA[C/T]AGAAGGGGAAATATTGATAAATATCAATGACGAATCTGTGAGACATTTCA	GT:DP:GQ:EC:SG	.:0:0:0:N	0/1:11:27:1:C	1:3:6:3:T	0:1:30:0:C	0/1:3:11:2:Y	1:2:3:2:T	0/1:8:31:3:Y	1:2:3:2:T
7538_GGCCGCTCACGCTCTTGCCCACTCCGCCCGGGTTT_NODE_2_length_300_cov_19.903334	70	.	A	C	58.38	PASS	NS=8:AN=1:DP=180:AS=AGCACTTTCTGTCAAAGGAAAAACTCAGGCATTGGAGATGTTCCTGGTTT[A/C]ACTGGTGGCAAGATTTTCACCTCCAGTCGGCTGCCTCCAGCTCGCTTCCC	GT:DP:GQ:EC:SG	1:16:48:16:C	1:63:134:63:C	1:29:84:29:C	1:12:33:12:C	1:19:54:19:C	1:7:18:7:C	1:29:84:29:C	1:5:12:5:C
4070_GGCCGGCTCTGCCCACGCGCCTGGATTACTCAGAG_NODE_2_length_308_cov_9.857142	56	.	G	C	44	PASS	NS=6:AN=1:DP=94:AS=ATCAGACATTCTGCTCAAAGTCTGGGCTCCTCCCTGAGAAACACGGTTTT[G/C]AAATCCGGCATCCAGAAGTCATGAAATTGGTTTCCCAAAGTGTGCCCTGA	GT:DP:GQ:EC:SG	.:0:0:0:.	1:32:93:32:C	1:31:90:31:C	1:3:6:3:C	1:9:24:9:C	1:6:15:6:C	1:13:36:13:C	.:0:0:0:.
8730_GGCCGCGAGAGCCAATCCGCTCGCACAGGAGGCCC_NODE_2_length_173_cov_8.502891	171	.	C	T	29.71	PASS	NS=7:AN=1:DP=190	GT:DP:GQ:EC:SG	0/1:67:29:61:T	.:0:0:0:.	1:2:9:2:T	0/1:11:28:9:Y	1:13:39:13:T	1:3:6:3:T	1:9:27:9:T	1:85:70:82:T
7275_GGCCGTGACCTTGTATCAACAAGCCGAGGAGTGCC_NODE_2_length_141_cov_8.971631	86	.	G	T	31.25	PASS	NS=8:AN=1:DP=132	GT:DP:GQ:EC:SG	1:4:9:4:T	0/1:26:0:7:G	0/1:34:43:21:K	0/1:25:24:9:K	0:11:60:0:G	0/1:7:23:4:K	0:18:81:0:G	0/1:7:10:2:G
3003_GGCCGATTCTCAGGCTTCCCGACCGCCAGCGTGAA_NODE_4_length_170_cov_14.694118	42	.	T	C	31.14	PASS	NS=7:AN=1:DP=89	GT:DP:GQ:EC:SG	1:9:24:9:C	1:21:60:21:C	1:18:51:18:C	0/1:11:2:10:Y	1:15:42:15:C	1:5:12:5:C	1:10:27:10:C	.:0:0:0:N
10652_GGCCGGGATTCCTCCAGTCTCAGTCAGACCATTAA_NODE_4_length_167_cov_6.155689	100	.	A	G	70.5	PASS	NS=8:AN=1:DP=154	GT:DP:GQ:EC:SG	0:34:129:0:A	0:10:57:0:A	0:13:66:0:A	0:22:99:0:A	0:19:64:0:A	0:11:60:0:A	0/1:10:34:5:R	0/1:35:55:3:A
9323_GGCCGGCCTTCCCCCTCACTGCCCTCTCCTAGGAA_NODE_2_length_314_cov_11.101911	44	.	A	T	16	PASS	NS=6:AN=1:DP=38	GT:DP:GQ:EC:SG	1:1:0:1:W	1:19:54:19:T	1:9:24:9:T	1:4:9:4:T	.:0:0:0:N	1:1:0:1:W	1:4:9:4:T	.:0:0:0:.
9177_GGCCGGTTAGGCTGGACCTCTCCTATTGGCTCAGT_NODE_2_length_145_cov_7.186207	63	.	C	G	79.88	PASS	NS=8:AN=1:DP=137	GT:DP:GQ:EC:SG	0:11:60:0:C	0/1:7:54:4:S	0:44:162:0:C	0:36:135:0:C	0:14:69:0:C	0:7:48:0:C	0:8:54:0:C	0:10:57:0:C
268_GGCCGGGGAGAAAAGGCCTCTTGCTATACTCTTTT_NODE_2_length_323_cov_12.445821	51	.	C	G	35.83	PASS	NS=6:AN=1:DP=21	GT:DP:GQ:EC:SG	0/1:3:17:1:C	0/1:11:69:7:S	.:0:0:0:.	0:1:30:0:C	0:4:39:0:C	0:1:30:0:C	0:1:30:0:C	.:0:0:0:.
6172_GGCCGCAAACTCAGCTGCTGAATTCGTGCCCGAGT_NODE_2_length_294_cov_8.289116	272	.	T	G	17.29	PASS	NS=7:AN=1:DP=37	GT:DP:GQ:EC:SG	0/1:3:19:2:K	.:0:0:0:.	1:2:3:2:G	0/1:12:45:5:K	0/1:2:13:1:T	0/1:6:7:3:K	0/1:6:16:1:T	1:6:18:6:G
9678_GGCCGAGAAGGTTCCGCGTGGGACTGTAGAGGGAC_NODE_2_length_207_cov_8.661836	107	.	T	G	48.38	PASS	NS=8:AN=1:DP=456	GT:DP:GQ:EC:SG	0/1:18:10:4:K	0/1:53:75:5:T	0/1:69:24:12:T	0/1:85:59:13:T	0/1:70:98:7:T	0/1:31:49:3:T	0/1:113:46:22:T	0/1:17:26:5:K
229_GGCCGGCGGGAGACTCGTGATCCTTCCGCCGCTTC_NODE_2_length_173_cov_14.763006	35	.	T	A	44.12	PASS	NS=8:AN=1:DP=65	GT:DP:GQ:EC:SG	0:3:36:0:T	0:8:51:0:T	0/1:16:17:14:W	0:17:78:0:T	0:6:45:0:T	0:5:42:0:T	0:7:48:0:T	0:3:36:0:T
8516_GGCCGGGCTGGGCTGGGGCAAGACCAGGAAGTCAG_NODE_2_length_178_cov_6.129213	75	.	T	C	48	PASS	NS=8:AN=1:DP=225:AS=CTGTGGTGAGAAAGGGCAGAAACTGGACGCTGTCCACGCTCCGGGTCACC[T/C]GCATGTGCCTGAGGTCCGAGCTGCAACAGGGCCCCGAAGGGAGGCATGAG	GT:DP:GQ:EC:SG	0/1:11:51:6:Y	0/1:34:58:13:Y	0/1:48:65:21:Y	0/1:44:18:11:Y	0/1:30:28:25:Y	1:16:45:16:C	0/1:37:77:25:Y	0:5:42:0:T
9648_GGCCGGGGTCTGGCCCGAGCCTCGGGAACGGAGGG_NODE_2_length_183_cov_8.442623	23	.	T	C	47	PASS	NS=8:AN=1:DP=84	GT:DP:GQ:EC:SG	0:7:48:0:T	0/1:5:6:2:Y	0/1:7:22:4:Y	0:20:87:0:T	0:14:69:0:T	1:4:9:4:C	0:26:105:0:T	0:1:30:0:T
5616_GGCCGTTAAGAGGTATGGGCTTCCAACAGTATTGC_NODE_2_length_283_cov_32.586571	39	.	A	G	40	PASS	NS=8:AN=1:DP=61	GT:DP:GQ:EC:SG	0/1:4:16:1:A	0/1:27:52:12:R	0:7:48:0:A	0:5:42:0:A	0:4:39:0:A	0:4:39:0:A	0:8:51:0:A	0:2:33:0:A
6474_GGCCGAGGCAACTCAAATCACAGTGGATCTGAAGA_NODE_2_length_273_cov_7.849817	56	.	G	A	38.38	PASS	NS=8:AN=1:DP=44	GT:DP:GQ:EC:SG	1:1:6:1:G	0:3:36:0:G	0/1:8:34:4:R	0:10:57:0:G	0:9:54:0:G	0:7:48:0:G	0:5:42:0:G	0:1:30:0:G
9271_GGCCGGTCTGTGCATTAAGTCCAAGCCAGGGAAAG_NODE_2_length_182_cov_13.230769	110	.	A	G	64	PASS	NS=8:AN=1:DP=105:AS=TTTAACCAAGTAAATTCCTCTCCTAATTCTGGTACATATGAAATTTGAGC[A/G]TACTCCATAAAACGTTCTGAAAATAGGATAAATTGAGTGTGTGTAGAGTG	GT:DP:GQ:EC:SG	0:3:36:0:A	0:6:45:0:A	0/1:14:68:6:R	0:40:147:0:A	0/1:20:96:10:R	0:5:42:0:A	0:12:63:0:A	0/1:5:15:4:R
542_GGCCGAAGCTTCGTGGATAAATGGGAACGTGGATG_NODE_2_length_292_cov_17.116438	31	.	C	G	15.33	PASS	NS=6:AN=1:DP=26	GT:DP:GQ:EC:SG	.:0:0:0:.	1:7:18:7:G	1:3:6:3:G	0:9:54:0:C	1:1:0:1:S	1:1:2:1:C	1:5:12:5:G	.:0:0:0:.
5544_GGCCGGCAGCCTTGGTGTGGCTGCCAGGGAGGTGC_NODE_2_length_265_cov_8.116982	26	.	C	T	15	PASS	NS=6:AN=1:DP=34	GT:DP:GQ:EC:SG	1:1:6:1:C	1:15:42:15:T	1:5:12:5:T	1:5:12:5:T	1:4:9:4:T	.:0:0:0:.	1:4:9:4:T	.:0:0:0:.
4228_GGCCGCCCTCCGCCACTTCTCCTCTGGCTCCTCCC_NODE_2_length_180_cov_5.422222	12	.	A	C	6.43	q10	NS=7:AN=1:DP=20	GT:DP:GQ:EC:SG	1:1:2:1:A	1:9:24:9:C	1:1:4:1:A	1:2:3:2:C	1:3:6:3:C	1:2:3:2:C	1:2:3:2:C	.:0:0:0:.
565_GGCCGCACCACCCCAGCCTTGTGGGCCTTTGCAGG_NODE_2_length_179_cov_7.173184	15	.	A	G	9.5	q10	NS=6:AN=1:DP=23	GT:DP:GQ:EC:SG	1:1:0:1:R	1:5:12:5:G	.:0:0:0:.	0/1:5:18:4:R	.:0:0:0:.	1:5:12:5:G	1:4:9:4:G	1:3:6:3:G
8064_GGCCGTCATGGCGCTGCAGGAGGCGTGCGAGGCCT_NODE_3_length_283_cov_11.816255	221	.	T	C	102.62	PASS	NS=8:AN=1:DP=248	GT:DP:GQ:EC:SG	0:20:90:0:T	0:14:69:0:T	0:27:108:0:T	0:60:208:0:T	0/1:42:67:23:Y	0:25:102:0:T	1:41:93:41:C	0:19:84:0:T
2856_GGCCGCCGGCTCCGAAGTCCCTGGGGGCTCAGCTG_NODE_2_length_296_cov_20.672297	257	.	C	G	29.12	PASS	NS=8:AN=1:DP=54	GT:DP:GQ:EC:SG	0/1:6:3:5:S	0/1:5:3:2:S	0:5:31:0:C	0/1:12:54:6:S	0/1:12:58:7:S	0:2:33:0:C	0/1:6:22:3:S	0/1:6:29:4:S
5336_GGCCGGAGAGCCCCTGAGCGGCGGCCAGCTTGGGG_NODE_2_length_281_cov_20.370108	242	.	C	T	100.38	PASS	NS=8:AN=1:DP=230	GT:DP:GQ:EC:SG	0:22:93:0:C	0:13:66:0:C	0:21:96:0:C	0:43:156:0:C	0/1:53:89:33:Y	0/1:19:77:9:Y	0:40:147:0:C	0/1:19:79:12:Y
4357_GGCCGAGTCCTGCGCCCCGCAAAAGGATCCTGTGC_NODE_2_length_306_cov_12.104575	197	.	T	G	108.62	PASS	NS=8:AN=1:DP=278:AS=CGGAGGGGTGGGGACGACAGTTAGAACGGAGGTGGGTTACCATAAACAAG[T/G]GAAAGGGTTCATGAAAGAGCGATGGGCGGACGTCACTTCGAGGTGGAGCT	GT:DP:GQ:EC:SG	0/1:16:28:12:K	0:46:165:0:T	1:36:105:36:G	0:61:194:0:T	0/1:38:72:21:K	0:26:108:0:T	0:52:187:0:T	0/1:3:10:2:K
6570_GGCCGAAAAAGAAATGCGAAGGGGTTAAAAACATC_NODE_2_length_292_cov_25.164383	12	.	G	A	29.83	PASS	NS=6:AN=1:DP=17	GT:DP:GQ:EC:SG	.:0:0:0:.	0/1:7:44:4:R	1:4:9:4:A	0:2:33:0:G	0:1:30:0:G	0:2:33:0:G	0:1:30:0:G	.:0:0:0:.
4218_GGCCGCGCAGACCTGTCAGGTCCTCCCGCCGGGGC_NODE_2_length_192_cov_6.770833	49	.	T	C	48.57	PASS	NS=7:AN=1:DP=139	GT:DP:GQ:EC:SG	1:13:36:13:C	0/1:7:19:3:Y	1:40:101:40:C	0:21:90:0:T	0/1:23:9:4:T	1:9:24:9:C	0/1:26:61:12:Y	.:0:0:0:.
8583_GGCCGCCCTGCCAAGGGCTTGCGCGCCAGAGGTAG_NODE_4_length_159_cov_19.899370	121	.	C	T	50.75	PASS	NS=8:AN=1:DP=115	GT:DP:GQ:EC:SG	0:14:72:0:C	0:3:36:0:C	0:3:36:0:C	0/1:29:67:15:Y	0/1:18:45:7:Y	0:10:57:0:C	0/1:25:27:8:Y	0:13:66:0:C
6474_GGCCGAGGCAACTCAAATCACAGTGGATCTGAAGA_NODE_2_length_273_cov_7.849817	89	.	T	A	29.25	PASS	NS=8:AN=1:DP=94	GT:DP:GQ:EC:SG	0/1:3:5:1:T	0:18:81:0:T	0/1:17:0:3:W	0/1:17:17:2:T	0/1:12:37:1:T	0/1:8:29:3:W	0/1:15:47:6:W	0/1:4:18:2:W
10003_GGCCGTTTCCCCCGGAGAACTGCCTCGCCGTAGCC_NODE_2_length_182_cov_6.456044	131	.	T	C	27.62	PASS	NS=8:AN=1:DP=99	GT:DP:GQ:EC:SG	0/1:5:7:2:Y	0/1:7:31:4:Y	0/1:17:80:8:Y	0/1:18:15:3:T	0/1:30:29:10:Y	0/1:5:17:1:T	0/1:12:25:9:Y	0/1:5:17:1:T
3783_GGCCGGGGGTGGCCTAGAGGTCTGTCCCAGCGCAC_NODE_2_length_308_cov_7.327922	72	.	C	T	44.38	PASS	NS=8:AN=1:DP=135:AS=CCTTATAATAAGTATAATAGTACCCAATTCCCAATAAAGTCACAGTAAAG[C/T]CTTCTTCATACTAGTAGTAGACCAAGCACTACTGTGACCAGTGACTTTGT	GT:DP:GQ:EC:SG	0:4:39:0:C	0/1:42:61:16:Y	1:48:105:47:T	0:20:87:0:C	1:11:30:11:T	0/1:5:17:1:C	1:4:9:4:T	1:1:7:1:C
690_GGCCGCTTCGCCCCTCTTCTCGCGTTCCAGCCTAC_NODE_2_length_302_cov_22.500000	273	.	A	C	52.57	PASS	NS=7:AN=1:DP=125	GT:DP:GQ:EC:SG	0:11:60:0:A	.:0:0:0:N	0/1:28:6:6:M	0:18:81:0:A	0/1:9:41:5:M	0/1:15:26:2:A	0:22:96:0:A	0/1:22:58:16:M
3878_GGCCGGAGCGTCATGGCGTCATCACGTCGACGCAG_NODE_2_length_155_cov_7.090322	155	.	A	C	9.29	q10	NS=7:AN=1:DP=20	GT:DP:GQ:EC:SG	1:2:3:2:C	1:2:3:2:C	1:4:9:4:C	1:7:18:7:C	1:3:6:3:C	.:0:0:0:N	1:1:12:1:A	1:1:14:1:A
236_GGCCGTGGCCAGTGCCCTTGCCCAGGGCTCCCCGG_NODE_2_length_286_cov_16.346153	75	.	G	A	52	PASS	NS=8:AN=1:DP=133:AS=ATTGACCAGTTTGAGTCAAAGAAATACTTTCCTGGTGAAAACGTTTTAAA[G/A]GGCAGTTCCAGATTTGCTGAAAACTGGAAAGCCCCTGCCGTTATGCTGGC	GT:DP:GQ:EC:SG	1:5:12:5:A	0/1:29:43:17:R	1:38:73:38:A	0:25:102:0:G	0:14:69:0:G	0:2:33:0:G	1:15:42:15:A	0:5:42:0:G
6097_GGCCGTTTAGCGATGAAGTCGTATCTGGGGACCCT_NODE_2_length_330_cov_21.087879	83	.	A	G	54.38	PASS	NS=8:AN=1:DP=153	GT:DP:GQ:EC:SG	1:3:6:3:G	0/1:49:65:34:R	0:32:123:0:A	0:20:87:0:A	0/1:17:29:14:R	1:8:21:8:G	0:21:93:0:A	0/1:3:11:1:A
808_GGCCGCTATTTAGCTCCATGTCTTCTGCATATTTA_NODE_2_length_279_cov_4.892473	103	.	G	T	51	PASS	NS=8:AN=1:DP=139:AS=GTGCCCTAACTCGAGCGCGCGGCAGTCACGTGGGAAGCGCGTGGCAAAGG[G/T]CCCGGGCCTCTTTGAGCATCACTTCCACTACCCTTGTGGCCAGTGGTCTC	GT:DP:GQ:EC:SG	1:8:21:8:T	1:35:99:35:T	1:43:105:43:T	1:25:81:25:T	1:13:51:13:T	1:1:6:1:T	1:12:42:12:T	1:2:3:2:T
1248_GGCCGCTATTTGCATACGGCTTATTTGCATGGAAC_NODE_2_length_237_cov_6.059072	203	.	G	C	16.25	PASS	NS=8:AN=1:DP=49	GT:DP:GQ:EC:SG	1:6:15:6:C	1:1:5:1:G	1:2:3:2:C	0:14:43:0:G	1:8:21:8:C	1:1:3:1:G	0:3:36:0:G	0/1:14:4:4:S
11133_GGCCGCCTCCCGTCGCCGACCACAAAGACCAAATG_NODE_2_length_214_cov_12.518692	156	.	A	T	103	PASS	NS=8:AN=1:DP=254:AS=TGGTTCCGGAACAGAACTCCAAGGCTCAAGTTCCCCAACCCGGGCAGAAA[A/T]AAAGAGGACTCTTGCGCAGGCGCAGTGACTTAATCAGGACTGGGTCGGAA	GT:DP:GQ:EC:SG	0:14:72:0:A	0:33:126:0:A	0:30:100:0:A	0:71:209:0:A	0/1:36:46:14:W	0:24:102:0:A	0:37:138:0:A	0/1:9:31:6:W
8688_GGCCGGGACTGGAGACAGGCCAGGCGGGGTTGCAG_NODE_2_length_249_cov_8.120481	247	.	G	A	32.33	PASS	NS=6:AN=1:DP=28	GT:DP:GQ:EC:SG	0/1:4:20:1:G	.:0:0:0:.	0:1:30:0:G	0:13:66:0:G	0:2:33:0:G	.:0:0:0:.	0:3:36:0:G	0/1:5:9:4:R
9456_GGCCGGGACGGCGCCTGGAGTCGCTCTGGCCGCGG_NODE_2_length_223_cov_11.071749	68	.	G	T	91.5	PASS	NS=8:AN=1:DP=178:AS=CTGGGGAGTCACGTCCTTGCCTGACCCCAGACCTGAGTATCACTGGGGGG[G/T]AGTTATTCTCCGGCACACAGCACCACTCAAGCCCCTTTGCGAAGGGAGAG	GT:DP:GQ:EC:SG	0/1:4:18:3:K	0:30:117:0:G	0:44:159:0:G	0:34:132:0:G	0:19:84:0:G	0:15:72:0:G	0:29:114:0:G	0:3:36:0:G
4799_GGCCGAGCCTCAGTGGGAGGAAGCACTGTGTTCTG_NODE_2_length_345_cov_11.962318	153	.	G	A	51.75	PASS	NS=8:AN=1:DP=167	GT:DP:GQ:EC:SG	0/1:13:50:7:R	1:11:30:11:A	0/1:45:87:26:R	0/1:26:55:10:R	1:12:36:12:A	1:13:36:13:A	1:41:119:41:A	0/1:6:1:2:R
618_GGCCGGAAGCTGGCTCGTTTACAGAGGAACAGGAC_NODE_2_length_224_cov_5.116071	91	.	C	T	70.62	PASS	NS=8:AN=1:DP=207:AS=CGGGCCTCCCCAGCTCGCCCAACGCCTTTCCTCAAATACCCACACGAAGT[C/T]ACAGAACCCTTACCTCCACCCCCAGCTCTCCTCGCAAACGCAGACCCGAG	GT:DP:GQ:EC:SG	0/1:19:85:11:Y	0/1:23:74:16:Y	0/1:37:95:23:Y	0/1:42:42:11:Y	0/1:28:92:17:Y	0/1:10:62:6:Y	0/1:43:94:24:Y	0/1:5:21:4:Y
10673_GGCCGCCTCGGCGTCTGTCTAGCTCAGGCTCACAC_NODE_2_length_320_cov_10.959375	133	.	A	G	44.12	PASS	NS=8:AN=1:DP=124:AS=CAAAGGTTGGCAGTTGGAATCCAGCACCGCCCCCTCGGCAACTCTGTGGG[A/G]CGGTTTTACTTGGTCTTATAGGATCGCTATGAGTCGGAATCCACTCGAGA	GT:DP:GQ:EC:SG	0/1:3:11:1:A	0:29:114:0:A	0/1:22:33:7:R	0/1:23:42:8:R	0/1:18:55:8:R	0/1:11:20:2:A	1:14:39:14:G	0:4:39:0:A
8492_GGCCGTGACCTAGGGTCACGACCTTGCTTGTATGC_NODE_2_length_307_cov_26.413681	95	.	T	A,C	45.5	PASS	NS=8:AN=2:DP=917	GT:DP:GQ:EC:SG	0/2:41:51:12:Y	0/1/2:271:76:24,65:T	0/1/2:180:12:14,50:Y	0/2:111:46:36:Y	0/2:107:77:42:Y	0/2:46:62:15:Y	0/1/2:131:22:12,26:T	0/1/2:30:18:4,6:Y
7365_GGCCGGGGTTCCATCCATCTTGCTGATGGGAGTGG_NODE_2_length_285_cov_16.294737	52	.	A	T	20.43	PASS	NS=7:AN=1:DP=50:AS=CACTCACGTGTCTATACCGGGCTCCCAGCATAGTACCCACACACAGGTCT[A/T]ACTGAATGAATCTCTCTTCCTCTGTCTCAGTCTGTCTCTCTCTCCATCTT	GT:DP:GQ:EC:SG	1:2:3:2:T	1:11:33:11:T	1:14:39:14:T	0/1:4:20:3:W	1:6:15:6:T	1:3:6:3:T	1:10:27:10:T	.:0:0:0:.
8812_GGCCGCAGTTTCCTCAGGGAGAAGCAGCCAGCCAC_NODE_2_length_161_cov_8.900621	68	.	C	T	32.62	PASS	NS=8:AN=1:DP=25	GT:DP:GQ:EC:SG	0:1:30:0:C	0:2:33:0:C	0:8:51:0:C	0:6:45:0:C	0:1:30:0:C	0:1:30:0:C	1:3:6:3:T	0:3:36:0:C
75_GGCCGGTGGAGCAACGCTGGGAGCGGAGTGTGCAC_NODE_2_length_288_cov_22.062500	35	.	A	T	40.5	PASS	NS=6:AN=1:DP=42	GT:DP:GQ:EC:SG	0:2:33:0:A	0:16:75:0:A	1:4:24:4:T	0:9:54:0:A	.:0:16:0:A	0:7:48:0:A	0/1:4:9:3:W	.:0:17:0:A
7892_GGCCGTGGCCCAAGTCCTTTACTGTCCATTGGGGA_NODE_2_length_214_cov_13.271028	140	.	A	G	47.88	PASS	NS=8:AN=1:DP=197	GT:DP:GQ:EC:SG	0:6:48:0:A	0:19:84:0:A	0/1:17:43:6:R	0/1:56:17:10:A	0/1:17:30:2:A	0:10:57:0:A	0/1:52:43:7:A	0:20:61:0:A
8431_GGCCGTAGCCGGGCCCTAACCATCGGAGCACAGCC_NODE_2_length_313_cov_11.169329	68	.	C	A	37.71	PASS	NS=7:AN=1:DP=105:AS=TCTGCTGGCTTTTTCTCACACCTGAAATCCCAGGTTCTTGTCCACTGGAG[C/A]ACTGGACCTGATGATTGCTGTCAGGAGTTGGTAGGTGAGAGGTGCTTAGA	GT:DP:GQ:EC:SG	1:3:9:3:A	1:22:69:22:A	1:51:118:51:A	1:13:25:13:A	1:6:18:6:A	1:1:1:1:C	1:9:24:9:A	.:0:0:0:.
5871_GGCCGGCAGCTCGCGGTAAGAGCTCAAGACACCCA_NODE_2_length_237_cov_11.350211	120	.	A	G	107.38	PASS	NS=8:AN=1:DP=279	GT:DP:GQ:EC:SG	0:34:129:0:A	0/1:12:27:4:R	1:27:78:27:G	0:78:216:0:A	0:62:210:0:A	0/1:15:65:8:R	1:47:125:47:G	1:4:9:4:G
6721_GGCCGAGGTCGGTATCGCAGCCTTAGCGGAGCAGG_NODE_2_length_157_cov_7.388535	57	.	G	A	35	PASS	NS=8:AN=1:DP=373	GT:DP:GQ:EC:SG	0/1:23:23:6:R	0/1:24:42:8:R	0/1:79:69:35:R	0/1:119:34:39:R	0/1:49:23:11:R	0/1:31:33:10:R	0/1:41:48:14:R	0/1:7:8:2:G
4739_GGCCGAGAGTTCCACCAGGCATGTCTCGTGGGCAG_NODE_2_length_321_cov_14.127726	46	.	A	G	13.86	PASS	NS=7:AN=1:DP=35	GT:DP:GQ:EC:SG	1:1:8:1:A	1:16:45:16:G	1:5:12:5:G	.:0:0:0:N	1:3:6:3:G	1:2:3:2:G	1:7:18:7:G	1:1:5:1:A
10843_GGCCGCCGGGCACCCTTGCACGCGTAGCGGTACGT_NODE_2_length_218_cov_11.110092	77	.	C	T	59.62	PASS	NS=8:AN=1:DP=153:AS=GATTACAGCCAAGAAAACTCTATAGGGCAGTTACATGGTGGTGTTATGAG[C/T]TGGGGCCAACCCCACGGCAGTTAACATCTCTACCTAAGGCGACAGTGTTC	GT:DP:GQ:EC:SG	1:12:36:12:T	1:15:42:15:T	1:27:78:27:T	0:38:144:0:C	1:29:87:29:T	1:12:33:12:T	1:17:51:17:T	1:3:6:3:T
7287_GGCCGTGGGAGACAGGATGGGAAGGGAAATCAGCG_NODE_1_length_131_cov_56.541985	33	.	C	A	42.88	PASS	NS=8:AN=1:DP=389	GT:DP:GQ:EC:SG	0/1:43:65:19:M	0/1:9:5:2:C	0:15:72:0:C	0/1:66:15:16:M	0/1:78:77:38:M	0/1:40:30:10:M	0/1:67:50:23:M	0/1:71:29:20:M
1246_GGCCGCGGGCGGCAAGGAGGCGGGCCCGGANCCTG_NODE_2_length_244_cov_5.950819	65	.	G	A	171.62	PASS	NS=8:AN=1:DP=884	GT:DP:GQ:EC:SG	1:98:164:97:A	1:149:203:149:A	1:118:183:118:A	1:178:222:178:A	1:164:203:164:A	1:36:108:36:A	1:93:153:92:A	1:48:137:48:A
5553_GGCCGCCAGGTTAGTCGTCAGAGCGCAGACCCCGC_NODE_1_length_346_cov_31.421965	114	.	A	T	58.88	PASS	NS=8:AN=1:DP=192:AS=GGTTAAAGCTTTGAGACCCTAAGCAACAAAAGGAAAGACCGTCGGGAGTA[A/T]ATGAAAGATTTTTGTTTCACATTTTCAGTAAACTTGTTTGCGCCTTTAAA	GT:DP:GQ:EC:SG	0/1:9:46:5:W	0/1:37:80:20:W	0/1:40:83:23:W	0/1:35:52:12:W	0/1:25:49:9:W	0/1:15:42:6:W	0/1:27:80:15:W	0:4:39:0:A
3477_GGCCGGTGGCTGTGCACACAATATCCTGCAAACAC_NODE_2_length_204_cov_22.990196	58	.	G	T	83.5	PASS	NS=8:AN=1:DP=288:AS=TGTATTTATAGAGAGTCTGGAGGGATGCTCAGGAGAACGCTGGCAGGAGT[G/T]CTCTATCACAGCCTAGTCACTGCAGGTGTCCCTTACCCTTTCTCTTGTGC	GT:DP:GQ:EC:SG	1:22:72:22:T	1:50:125:50:T	1:41:120:41:T	0/1:63:32:16:K	1:32:93:32:T	0/1:17:61:7:K	1:50:126:50:T	1:13:39:13:T
3420_GGCCGCTTCCGAGGCTGCGGCCCGCTGCAGTGCTG_NODE_2_length_291_cov_10.436426	63	.	T	C	46.75	PASS	NS=8:AN=1:DP=108:AS=TTTCAGCTATGACACAATCTGTATGACTTTGGGCAAGTTTTGTCTCCAGG[T/C]ACAGGTTTCCTCCTCTGCTGAGATGCTGTGAAGCCCTTTCCAGCTCTGGC	GT:DP:GQ:EC:SG	1:5:12:5:C	0/1:25:81:16:Y	1:20:57:20:C	0/1:23:93:13:Y	0/1:13:74:7:Y	1:5:12:5:C	1:16:45:16:C	1:1:0:1:C
10196_GGCCGCCGACACGACCGCTCAGATCACCCAGCGCA_NODE_5_length_148_cov_13.804054	82	.	C	T	73.5	PASS	NS=8:AN=1:DP=201	GT:DP:GQ:EC:SG	0/1:8:7:7:Y	1:46:124:46:T	1:48:125:48:T	0/1:26:77:12:Y	0/1:21:64:10:Y	0/1:24:85:13:Y	1:21:66:21:T	0/1:7:40:4:Y
8439_GGCCGCGAGGCGAGGAGTAACCCCTCCCGGGGACG_NODE_2_length_318_cov_7.572327	35	.	T	A	19.5	PASS	NS=6:AN=1:DP=39	GT:DP:GQ:EC:SG	1:1:6:1:T	1:11:30:11:A	1:11:30:11:A	0/1:6:18:5:W	.:0:0:0:.	.:0:0:0:.	1:9:24:9:A	1:1:9:1:T
1157_GGCCGTGAGCGGTGGAGATGAGAACCGAACTTGGA_NODE_4_length_175_cov_49.554287	144	.	T	C	123.62	PASS	NS=8:AN=1:DP=272	GT:DP:GQ:EC:SG	0:15:72:0:T	0:12:63:0:T	0:31:120:0:T	0:78:206:0:T	0:53:190:0:T	0:26:105:0:T	0:45:168:0:T	0/1:12:65:7:Y
4732_GGCCGCACCTTCCTCCCGTGGAAGCTGCTCGGCCC_NODE_3_length_177_cov_27.508474	171	.	C	T	24.88	PASS	NS=8:AN=1:DP=52	GT:DP:GQ:EC:SG	0/1:14:24:2:C	0:1:30:0:C	0:2:33:0:C	0/1:14:27:2:C	0/1:3:20:1:C	0:3:36:0:C	0/1:6:3:2:C	0/1:9:26:4:Y
3404_GGCCGCTGAGCCGGAGCCGGAGCCGGAGCCGGGGG_NODE_2_length_211_cov_7.232227	21	.	A	G	27.14	PASS	NS=7:AN=1:DP=57	GT:DP:GQ:EC:SG	1:7:18:7:G	0/1:4:13:2:R	1:19:54:19:G	0/1:13:38:10:R	1:8:21:8:G	0:4:39:0:A	0/1:2:7:1:A	.:0:0:0:.
9859_GGCCGCTCTTTTTCCTGCAGTGTCAGCTAATTCAT_NODE_1_length_374_cov_54.858288	289	.	G	A	32.88	PASS	NS=8:AN=1:DP=503:AS=CAAGTTAGTAGCTCTTACCTAAGCTTGCAGATTAGGAAAAAAATCAATCC[G/A]TGACCATATTTACAAATCCCAAGTATATATTTGGATGGTTCGTGACTTTG	GT:DP:GQ:EC:SG	0/1:46:22:9:R	0/1:17:36:6:R	0/1:36:38:8:R	0/1:121:10:29:R	0/1:111:77:40:R	0/1:40:1:6:G	0/1:64:40:8:G	0/1:68:39:16:R
5918_GGCCGGGCCAGGTCTCTCTGCTTTAGGGAAAGAGC_NODE_2_length_287_cov_5.282230	104	.	T	C	44.62	PASS	NS=8:AN=1:DP=73	GT:DP:GQ:EC:SG	0:4:39:0:T	0/1:13:85:8:Y	0/1:10:5:2:T	0:9:54:0:T	0:17:78:0:T	0:4:39:0:T	0/1:14:24:2:T	0:2:33:0:T
4277_GGCCGTCGGAGCGCCGGGGAGGCAGCAGGCCCTCG_NODE_2_length_266_cov_14.124060	200	.	T	C	116.25	PASS	NS=8:AN=1:DP=332:AS=CTGCTACGTGAAGAGGTGTTATTGTAGTTCAAAGCAGAGGCAACACTCCT[T/C]GGAGCTTCTCTGAATAGGGTGCGAAAGTTCTCATCCTCGGGGGAAAGACT	GT:DP:GQ:EC:SG	0/1:38:73:15:Y	0:25:102:0:T	0:29:114:0:T	0:87:214:0:T	0/1:52:89:27:Y	0:26:105:0:T	0:44:162:0:T	0/1:31:71:12:Y
631_GGCCGCTCACCGAAGGCTTAGAGGTTCAAATGCAC_NODE_2_length_267_cov_7.033708	267	.	G	A	16.43	PASS	NS=7:AN=1:DP=15	GT:DP:GQ:EC:SG	0:1:30:0:G	.:0:0:0:.	0:2:33:0:G	0/1:2:4:1:G	1:1:12:1:G	0/1:3:17:2:R	1:4:9:4:A	0/1:2:10:1:G
9004_GGCCGTGACGGACCAACGGCCAGATGGGCTCAACT_NODE_4_length_231_cov_14.290043	169	.	C	A	62.75	PASS	NS=8:AN=1:DP=364	GT:DP:GQ:EC:SG	0/1:33:77:20:M	0/1:26:77:16:M	0/1:68:75:37:M	0/1:99:75:53:M	0/1:52:73:29:M	0/1:20:6:5:M	0/1:56:71:30:M	0/1:10:48:6:M
9948_GGCCGGGTCGTGAGGACACCCGAGGGGGCAGGAGA_NODE_2_length_315_cov_23.863493	59	.	T	C	65.5	PASS	NS=8:AN=1:DP=143	GT:DP:GQ:EC:SG	0:8:51:0:T	0:34:129:0:T	0:34:129:0:T	0/1:26:53:2:T	0/1:11:48:5:Y	0:8:51:0:T	0/1:17:21:2:T	0:5:42:0:T
575_GGCCGCGGGGGGGCACTGCGCACAAGCCCGGGAGA_NODE_2_length_336_cov_13.214286	28	.	C	T	20.17	PASS	NS=6:AN=1:DP=22	GT:DP:GQ:EC:SG	.:0:0:0:.	0/1:8:3:2:Y	0:4:39:0:C	0:2:33:0:C	1:2:3:2:T	1:1:11:1:C	0/1:5:32:3:Y	.:0:0:0:.
9554_GGCCGCCCTCTTTCCTATCGCCACCAAATGGGCGG_NODE_2_length_280_cov_5.600000	120	.	A	C	33	PASS	NS=8:AN=1:DP=97	GT:DP:GQ:EC:SG	1:2:3:2:C	1:34:81:34:C	1:16:45:16:C	1:17:54:17:C	1:12:33:12:C	1:3:6:3:C	1:10:33:10:C	1:3:9:3:C
7610_GGCCGGCGCCTCCCGCCCTGGTGGGACCGCTGAGC_NODE_2_length_247_cov_10.971660	205	.	C	A	36.88	PASS	NS=8:AN=1:DP=84:AS=CGTTGCCATTTCCTCGGCCTTCATTTATTTATTTTTTTTCCGGCGCTGGC[C/A]GCCAGATCCTTTGTTGTGCCTCCTCTGCATTCATTTCTCTCTGCCCTCAC	GT:DP:GQ:EC:SG	0/1:10:54:5:M	1:2:3:2:A	0/1:12:2:3:M	0:15:72:0:C	0:21:90:0:C	0/1:9:34:4:M	0/1:14:10:4:M	0:1:30:0:C
8683_GGCCGGTACTCAGGAAATGTTTGGAGAAGTGAATC_NODE_3_length_168_cov_9.952381	89	.	C	G	47.62	PASS	NS=8:AN=1:DP=187	GT:DP:GQ:EC:SG	0/1:12:60:6:S	0/1:60:56:18:S	0:33:97:0:C	0/1:23:28:3:C	0/1:12:34:1:C	0/1:19:38:6:S	0/1:22:49:7:S	0/1:6:19:1:C
6658_GGCCGGCAGCCACTTCCAAAGTCACACTCTGACCC_NODE_2_length_144_cov_11.881945	135	.	A	G	35	PASS	NS=7:AN=1:DP=30	GT:DP:GQ:EC:SG	0:4:39:0:A	.:0:0:0:.	0:2:33:0:A	0:4:39:0:A	0/1:10:23:5:R	0:4:39:0:A	0:4:39:0:A	0:2:33:0:A
5752_GGCCGCTTAACCCTTCGCTCCCCGACACGCGCCGT_NODE_2_length_206_cov_7.131068	140	.	C	T	91.88	PASS	NS=8:AN=1:DP=325	GT:DP:GQ:EC:SG	1:36:108:36:T	0/1:26:88:13:Y	1:59:146:59:T	0/1:95:113:52:Y	1:44:132:44:T	1:15:42:15:T	0/1:43:74:31:Y	0/1:7:32:3:Y
6655_GGCCGGCTCGTCCCTTTGCCCTGCGGGGTCAAGAG_NODE_2_length_295_cov_6.261017	134	.	A	C	61	PASS	NS=8:AN=1:DP=169:AS=ATTAGGGAGGCCAACCAAAGCTCGCCCAAGTGACTCAGACAACAGGGTCC[A/C]GCCTGGTGAGTCCCATCCTCATCCTCAAATCCCACATCTTCGTTCACAAC	GT:DP:GQ:EC:SG	0:10:57:0:A	0/1:36:76:18:M	0/1:38:70:15:M	0:33:126:0:A	0/1:18:6:4:M	0:8:51:0:A	1:22:63:22:C	0:4:39:0:A
10806_GGCCGGTCAAGGTGTGCGGTGGGCGAGCTGGGGCT_NODE_2_length_171_cov_8.122807	10	.	T	C	9.5	q10	NS=6:AN=1:DP=23	GT:DP:GQ:EC:SG	1:3:9:3:C	1:8:21:8:C	1:3:9:3:C	1:3:6:3:C	1:2:3:2:C	.:0:0:0:.	1:4:9:4:C	.:0:0:0:.
9863_GGCCGCGCAGCCGCGTGGCAGCACTGCCGAGCTAG_NODE_2_length_195_cov_17.128204	153	.	T	G	87.62	PASS	NS=8:AN=1:DP=203	GT:DP:GQ:EC:SG	0/1:25:99:15:K	1:16:45:16:G	1:16:45:16:G	0:43:156:0:T	0:42:156:0:T	0/1:23:66:12:K	1:31:90:31:G	0/1:7:44:4:K
4176_GGCCGCTTAAGGAAAATTGTAAGGAAGTGGATGAG_NODE_2_length_305_cov_17.278688	48	.	C	T	27	PASS	NS=6:AN=1:DP=50	GT:DP:GQ:EC:SG	.:0:0:0:.	1:19:54:19:T	1:17:48:17:T	0:1:30:0:C	1:6:15:6:T	1:2:3:2:T	1:5:12:5:T	.:0:0:0:.
8866_GGCCGGATGAGGAGCCAGTGTGCAGAACAGACCTG_NODE_2_length_314_cov_24.057325	55	.	A	G	53.43	PASS	NS=7:AN=1:DP=122:AS=CCTACCTATAAGCGGAAATCATAGTCAAACAGGTCCCCAAGCACTTGCAC[A/G]TCCATTTCACCTTCAGAATGTGAGTGAGGCATTACCTCAGGTGTCACTTT	GT:DP:GQ:EC:SG	1:1:15:1:A	0/1:39:109:23:R	1:36:108:36:G	0:13:66:0:A	0/1:14:16:3:A	1:9:24:9:G	0/1:10:36:5:R	.:0:0:0:.
3046_GGCCGGACTTTGCGCTACCATCCCGCACCTGCCTT_NODE_2_length_320_cov_9.350000	274	.	A	T	29.71	PASS	NS=7:AN=1:DP=66:AS=TGTTCCTCTAGCTGTCCTTCTTAGCCCCAAGAACTTCAACACACCCCTTA[A/T]TCTCCTTCCTGTCCTTCGGGTTTAACACAGCGCCCGACACACAGCAGGAG	GT:DP:GQ:EC:SG	0:8:51:0:A	.:0:0:0:.	1:3:6:3:T	0/1:18:4:4:W	1:15:42:15:T	0/1:13:33:5:W	0/1:6:36:4:W	0:3:36:0:A
4249_GGCCGATAAAAGTTGCTTAGGTGCAAAGAGAAGCA_NODE_2_length_203_cov_21.049261	77	.	C	T	99.75	PASS	NS=8:AN=1:DP=341:AS=AGGCTCGAGGCCGCCTTCTTTCTCCTTTTCTGCAATCTACTGGAGGAGAC[C/T]GCCCTTCTCCCTTCCCCCACTTTGGTCAAACGAACTTCACTATTTGGGTT	GT:DP:GQ:EC:SG	0/1:24:70:11:Y	0/1:53:88:26:Y	1:79:141:79:T	0:64:211:0:C	0/1:32:90:19:Y	1:22:63:22:T	0/1:59:81:24:Y	0:8:54:0:C
6474_GGCCGAGGCAACTCAAATCACAGTGGATCTGAAGA_NODE_2_length_273_cov_7.849817	96	.	T	G	30.62	PASS	NS=8:AN=1:DP=101	GT:DP:GQ:EC:SG	0:3:36:0:T	0:18:54:0:T	0/1:17:24:5:K	0:20:59:0:T	0/1:14:19:2:T	0/1:7:9:3:K	0/1:18:5:4:K	0:4:39:0:T
9343_GGCCGACCCATCGAAAGAGCTCTTCGGCAGCAGAG_NODE_2_length_275_cov_20.050909	89	.	G	A	69.75	PASS	NS=8:AN=1:DP=696:AS=CCCGTGCGGAAAGCCCTCCCCGGTGGTCCTCCACCTTCTGCCCGCTGAAC[G/A]GCAGCAACTCGCTTTTGCCCTGCGCTGCTGCAAGCAGCACCACACCACCC	GT:DP:GQ:EC:SG	0/1:69:44:10:G	0/1:234:166:43:G	0:167:185:0:G	0/1:105:107:12:G	0/1:49:28:11:R	0/1:28:1:5:R	0/1:36:5:6:G	0/1:8:22:1:G
10657_GGCCGGGCTCAGCAAGGGGGAGGAACCCTGGAGCT_NODE_2_length_330_cov_15.675757	99	.	T	C	102.25	PASS	NS=8:AN=1:DP=206:AS=GCTAGCAGCCGAGCATGTTAACTGTTTGTACCACTGGTTGCTTAGTAAGG[T/C]GGAGGTAAAATGAAAGTCATCAAGCTCCTATTTTACAAATATTAGCGTCT	GT:DP:GQ:EC:SG	0:25:102:0:T	0:26:108:0:T	0:29:120:0:T	0:43:156:0:T	0/1:18:62:9:Y	0:15:75:0:T	0:39:156:0:T	0/1:11:39:4:Y
4325_GGCCGCAGCCTTGCAGGAATCTCTGGAAAATGCCG_NODE_2_length_367_cov_22.948229	167	.	A	G	94.12	PASS	NS=8:AN=1:DP=234:AS=AGAACTCAAACTCCAACTCATCTGGCCTTAGTAATAAACACTTGGGAGGA[A/G]GTGAGGAGCTCTTTAGGGTTGGGGTCTTTGCCTCTTCTGCTTCAACTGGG	GT:DP:GQ:EC:SG	0/1:12:59:8:R	1:62:108:62:G	0:44:159:0:A	0:20:87:0:A	0/1:23:62:12:R	0:18:81:0:A	0:46:168:0:A	0/1:9:29:7:R
7160_GGCCGGCACCTGATGCTCCTGGAGTCGGGGAACTA_NODE_2_length_202_cov_11.544555	194	.	C	G	9.14	q10	NS=7:AN=1:DP=21	GT:DP:GQ:EC:SG	1:3:6:3:G	.:0:0:0:N	1:4:9:4:G	0:1:20:0:C	1:6:15:6:G	1:2:3:2:G	1:4:9:4:G	1:1:2:1:C
3252_GGCCGCCGGCTCCTAAGTCCCTGGGGGCTCTGCTG_NODE_2_length_376_cov_13.074468	108	.	T	C	25.12	PASS	NS=8:AN=1:DP=128	GT:DP:GQ:EC:SG	0/1:5:4:2:Y	0/1:42:51:13:Y	0/1:39:43:4:T	0:8:51:0:T	0/1:8:5:2:Y	0/1:6:16:1:T	0/1:19:1:4:T	0:1:30:0:T
6782_GGCCGCGGTCGCCTTCCTCCACGCGGGCGGGGGCG_NODE_2_length_315_cov_5.238095	92	.	G	C	30.5	PASS	NS=8:AN=1:DP=43	GT:DP:GQ:EC:SG	1:3:6:3:C	0:5:42:0:G	1:1:0:1:C	0:19:84:0:G	0:1:30:0:G	0:2:33:0:G	0/1:11:19:3:S	0:1:30:0:G
6698_GGCCGCCAACGGCTGCCGGTTCTTACGCATGCGTA_NODE_2_length_320_cov_15.753125	322	.	C	T	27.14	PASS	NS=7:AN=1:DP=20	GT:DP:GQ:EC:SG	0/1:4:10:1:C	.:0:0:0:.	1:4:9:4:T	0:2:33:0:C	0:3:36:0:C	0:1:30:0:C	0:4:39:0:C	0:2:33:0:C
7127_GGCCGTAGCTACACAATTTTCCCTTCCTGTCATGA_NODE_2_length_272_cov_25.937500	134	.	G	T	84.75	PASS	NS=8:AN=1:DP=358:AS=TTTCTCTTAATAGTCTGCCTTAGACAACCTGCCCTCTAAATTCCACACCC[G/T]GCCTTCAACGTAGTTGTTTGTAGAATTTATTCTGACCACTAGATGTCGCC	GT:DP:GQ:EC:SG	1:43:126:43:T	0/1:42:72:15:K	0/1:59:73:23:K	0/1:68:85:31:K	0/1:34:93:19:K	0/1:19:29:5:K	1:75:139:75:T	0/1:18:61:8:K
4591_GGCCGCTGGGTTCCTACACTCAAAATTGAAGTTCA_NODE_2_length_234_cov_8.025641	90	.	T	C	24	PASS	NS=8:AN=1:DP=53	GT:DP:GQ:EC:SG	1:1:6:1:T	1:2:3:2:C	1:4:9:4:C	0:20:87:0:T	1:7:18:7:C	1:7:18:7:C	0/1:9:45:6:Y	1:3:6:3:C
4877_GGCCGTATCCTCCCCCGGCAGACAGCCCACCCCGG_NODE_2_length_245_cov_10.322449	76	.	C	T	33.25	PASS	NS=8:AN=1:DP=95	GT:DP:GQ:EC:SG	0/1:6:3:2:Y	1:17:48:17:T	1:23:66:23:T	0:24:102:0:C	1:6:15:6:T	1:3:6:3:T	1:15:22:14:T	1:1:4:1:C
6960_GGCCGGTAGAGATGGTGAAAAAGCCGTTTTGGTAG_NODE_2_length_338_cov_27.056213	47	.	G	T	54	PASS	NS=8:AN=1:DP=80	GT:DP:GQ:EC:SG	1:2:3:2:T	0:33:132:0:G	0:19:84:0:G	0:4:39:0:G	0:4:39:0:G	0:2:33:0:G	0:15:72:0:G	0:1:30:0:G
3287_GGCCGCCGCTGCTTCGTGGAGGCCGCGGAGGTGGG_NODE_2_length_218_cov_7.513762	205	.	A	C	32.88	PASS	NS=8:AN=1:DP=69	GT:DP:GQ:EC:SG	0:7:48:0:A	0:1:30:0:A	0:11:60:0:A	0/1:19:33:8:M	0/1:6:22:1:A	0/1:8:29:1:A	0/1:12:26:2:A	0/1:5:15:3:M
5953_GGCCGCTAACCAAGAGGCGAGGAGTTTGAATCCAG_NODE_2_length_287_cov_3.735192	231	.	T	C	48.5	PASS	NS=8:AN=1:DP=82:AS=TTGCTGAGATCATCGAGGTGGTCTCTGGCTCAGGAGCCGGGGAAGGGAGC[T/C]GGCGCCTGTCATTGGCACAAATCTTCGGGTGCAGTCTGGAGGTTGAAAAT	GT:DP:GQ:EC:SG	0:8:51:0:T	0:16:56:0:T	0:5:42:0:T	0/1:17:20:4:Y	0:11:63:0:T	0:4:39:0:T	0:18:81:0:T	0:3:36:0:T
7636_GGCCGGCGAATTGGCAGAGAAGCTCTACCTGGAGG_NODE_2_length_219_cov_19.479452	42	.	T	C	50.12	PASS	NS=8:AN=1:DP=98	GT:DP:GQ:EC:SG	0:1:30:0:T	0:27:108:0:T	0:22:93:0:T	0:22:93:0:T	1:11:30:11:C	0:4:39:0:T	0/1:9:5:8:Y	1:2:3:2:C
6094_GGCCGAGAAGGTCCCGCATGGGACTGTAGAGGGAC_NODE_3_length_237_cov_19.763714	215	.	T	C,G	15.75	PASS	NS=8:AN=2:DP=910	GT:DP:GQ:EC:SG	0/1/2:143:30:103,14:K	0/1:5:15:4:Y	0/1/2:65:2:40,10:Y	0/1/2:206:2:143,18:C	0/1/2:155:24:112,14:K	0/1/2:127:0:86,12:Y	0/1/2:97:27:68,8:Y	0/1/2:112:26:81,12:K
9177_GGCCGGTTAGGCTGGACCTCTCCTATTGGCTCAGT_NODE_2_length_145_cov_7.186207	78	.	A	G	64.5	PASS	NS=8:AN=1:DP=143	GT:DP:GQ:EC:SG	0:13:66:0:A	0/1:7:22:1:A	0:36:124:0:A	0/1:34:64:3:A	0:23:102:0:A	0:10:60:0:A	0/1:13:27:4:R	0:7:51:0:A
2560_GGCCGGAAGACGGTGGGGCCGGCCACAGCGCGGGG_NODE_1_length_299_cov_65.020065	136	.	G	A	58.62	PASS	NS=8:AN=1:DP=5849	GT:DP:GQ:EC:SG	0/1:510:187:104:G	0/1:1139:4:398:G	0/1:1595:46:682:R	0/1:1018:39:335:G	0/1:637:64:278:R	0/1:251:16:91:R	0/1:632:78:310:R	0/1:67:35:23:R
1762_GGCCGCACTCTTTCTGACTACAACATCCAGAAGGA_NODE_1_length_173_cov_8.208093	37	.	A	G	34.71	PASS	NS=7:AN=1:DP=28	GT:DP:GQ:EC:SG	.:0:0:0:.	0:5:42:0:A	0:2:33:0:A	0:7:48:0:A	1:5:12:5:G	0:4:39:0:A	0:4:39:0:A	0:1:30:0:A
3142_GGCCGGTTTAAAGAGCTACTACAACAGGCGCTCTA_NODE_2_length_242_cov_7.652893	45	.	G	C	30.25	PASS	NS=8:AN=1:DP=98	GT:DP:GQ:EC:SG	0:3:36:0:G	0/1:39:27:10:S	0/1:17:24:2:G	0:15:72:0:G	0/1:11:23:4:S	1:2:3:2:C	0/1:10:27:5:S	0:1:30:0:G
443_GGCCGTGCCGGCCTGGAGAGCCCGCCCCGTTCGGG_NODE_3_length_155_cov_3.116129	55	.	C	T	20	PASS	NS=6:AN=1:DP=36:AS=GATCACGGGCCCCGAGGTGAGTGTGTGCGGGGGAGGGGAAGGGGAAGACG[C/T]CCAAACGAGGAGAAAACTGAAGACTTCCTCGTTTCTCCCCATTCTCCCTT	GT:DP:GQ:EC:SG	.:0:0:0:.	1:13:42:13:T	1:13:39:13:T	1:6:18:6:T	1:1:15:1:C	1:1:3:1:C	1:2:3:2:T	.:0:0:0:.
1732_GGCCGGATGGTCTGCAGAGGCTTTCCGCTCAGCGT_NODE_2_length_204_cov_26.348040	78	.	C	T	130.75	PASS	NS=8:AN=1:DP=366:AS=ACATGCACGTATCAGGAAGGCAATGGTCAGGAAAGGGCTTCCAGTTCAGG[C/T]TGAGAACAATTTGACTTTGCTTCTGTTTTTTCTGATTTTACTCTCTTTTT	GT:DP:GQ:EC:SG	0:46:165:0:C	0/1:30:40:8:Y	0:40:147:0:C	0:59:205:0:C	0:59:205:0:C	0:34:129:0:C	0/1:80:74:39:Y	0:18:81:0:C
4732_GGCCGCACCTTCCTCCCGTGGAAGCTGCTCGGCCC_NODE_3_length_177_cov_27.508474	135	.	G	T	29.75	PASS	NS=8:AN=1:DP=235	GT:DP:GQ:EC:SG	0/1:40:15:7:K	0:2:33:0:G	0/1:11:22:4:K	0/1:76:70:28:K	0/1:42:19:9:K	0/1:19:35:6:K	0/1:19:34:5:K	0/1:26:10:5:K
4101_GGCCGCGATGCGCATGTTCCTGGAGGTCAGGAGAC_NODE_2_length_333_cov_17.396397	83	.	A	G	40.88	PASS	NS=8:AN=1:DP=88:AS=GCGGCGAGGGGCAAGAAGACCAGAAGGTATTTACAAAACAGGAAGCTCGC[A/G]CATTGGAACTGATCCCATAACGAGGGTCCGGAACAGAACCACACAACCCA	GT:DP:GQ:EC:SG	0:8:51:0:A	0/1:31:38:7:R	0:21:90:0:A	0:8:51:0:A	0:6:45:0:A	1:4:9:4:G	0/1:7:34:3:R	0/1:3:9:2:R
7868_GGCCGAAAGCAGAGAGTACCACACGGGTGTTTACC_NODE_2_length_178_cov_5.758427	12	.	G	A	5.17	q10	NS=6:AN=1:DP=14	GT:DP:GQ:EC:SG	1:3:6:3:A	1:1:2:1:G	.:0:0:0:N	.:0:0:0:.	1:6:15:6:A	1:1:3:1:G	1:1:2:1:G	1:2:3:2:A
4959_GGCCGGCCTCCTGCTGCGGCTCCCCTATTCCACGT_NODE_2_length_288_cov_4.333333	260	.	A	C	14.5	PASS	NS=6:AN=1:DP=25	GT:DP:GQ:EC:SG	1:10:27:10:C	.:0:0:0:.	1:1:11:1:A	1:9:27:9:C	.:0:0:0:N	1:1:12:1:A	1:3:6:3:C	1:1:4:1:A
4843_GGCCGTCACCCTGTGGAGACGTGCCCATGAGCTCC_NODE_2_length_323_cov_20.170279	174	.	T	C	140.75	PASS	NS=8:AN=1:DP=404	GT:DP:GQ:EC:SG	0/1:16:46:5:Y	0:32:123:0:T	0:60:203:0:T	0:90:218:0:T	0:81:209:0:T	0/1:27:78:10:Y	0:85:213:0:T	1:13:36:13:C
6733_GGCCGAATTGGTCCGGCTGCCCCCCGCACGCCGCT_NODE_2_length_302_cov_3.619205	50	.	A	C	41	PASS	NS=6:AN=1:DP=87	GT:DP:GQ:EC:SG	.:0:0:0:.	1:34:99:34:C	1:28:84:28:C	1:9:24:9:C	1:6:15:6:C	1:4:9:4:C	1:6:15:6:C	.:0:0:0:.
1152_GGCCGTGGGAAATACAGAAATGGAAGCTAGGTTCT_NODE_2_length_234_cov_19.089743	128	.	C	T	136.5	PASS	NS=8:AN=1:DP=335:AS=TCCCAGGGAGCAGCAAGTGGGTTCGAACTGCTGACCTTTTGTTTAGCAGC[C/T]TGAGATCTTAACCACTGCACCACCAGGGCTCCTCTTATAAGAAGGGACCC	GT:DP:GQ:EC:SG	0:27:108:0:C	0:56:169:0:C	0:76:219:0:C	0:45:162:0:C	0:61:211:0:C	0/1:22:25:6:Y	0:40:147:0:C	0:8:51:0:C
1252_GGCCGAGGAGTGAGGTGGTTTTTCCTGGACCCCTC_NODE_2_length_317_cov_22.372240	230	.	C	T	96	PASS	NS=8:AN=1:DP=321:AS=CCTTCATTTTAACAACTCTGAGTAATGGTCTTTTCCAAATCAAAAGAGCA[C/T]TAGTAGTTCCTAAATGTAGACAAGTTTTTGAAAATCTCTCTGGAGATCCT	GT:DP:GQ:EC:SG	0/1:39:93:21:Y	0/1:20:73:10:Y	0/1:14:43:5:Y	0/1:67:78:27:Y	1:67:136:67:T	0/1:20:75:9:Y	0/1:45:95:26:Y	0:49:175:0:C
83_GGCCGAGGACGCGCTGCTGGGGGGACACCACCAAA_NODE_2_length_268_cov_13.802238	32	.	G	A	24.43	PASS	NS=7:AN=1:DP=40	GT:DP:GQ:EC:SG	1:5:24:5:A	1:19:69:19:A	1:11:45:11:A	1:1:12:1:G	1:1:6:1:A	1:1:6:1:G	1:2:9:2:A	.:0:0:0:.
495_GGCCGTGGGGCGTTGCCTTTGCTCTTCTTCCACTT_NODE_2_length_292_cov_12.845890	272	.	G	A	25.5	PASS	NS=6:AN=1:DP=29	GT:DP:GQ:EC:SG	0/1:8:9:2:G	.:0:0:0:.	.:0:0:0:.	0:3:36:0:G	1:3:6:3:A	0:5:42:0:G	0:1:30:0:G	0/1:9:30:1:G
1468_GGCCGGGCAGAGCTGCGTTCAGCTTCACAGCCAGG_NODE_3_length_240_cov_15.979167	135	.	A	G	37.75	PASS	NS=8:AN=1:DP=300	GT:DP:GQ:EC:SG	0/1:129:72:112:G	0/1:5:20:3:R	0/1:12:3:4:A	0/1:41:66:21:R	0/1:16:58:9:R	0/1:15:26:6:R	0/1:12:20:2:A	0/1:70:37:54:R
732_GGCCGGAGCATACGGAAGGATGGAGTTGCCCTCAA_NODE_2_length_190_cov_4.400000	76	.	C	A	27.29	PASS	NS=7:AN=1:DP=46:AS=GATAATTCCGCGAAGGTCGCATTCCTCCTGTTTTCTCAAAAAAGCGAGCC[C/A]GCAGGCGAGGCGCCAAGCCCTCCGGAAGTCCACTGACTCACGCGCGAAGC	GT:DP:GQ:EC:SG	0:1:30:0:C	0:1:30:0:C	.:0:0:0:.	0/1:25:79:15:M	1:7:18:7:A	0/1:9:27:4:M	0/1:2:5:1:C	1:1:2:1:C
404_GGCCGGTTCCGCAGACCCCTCCATTTTACCCAAGG_NODE_2_length_207_cov_6.101449	26	.	A	T,C	10.86	PASS	NS=7:AN=2:DP=18	GT:DP:GQ:EC:SG	.:0:0:0:.	0/1/2:5:10:1,3:M	2:5:12:5:C	0/1:3:7:2:W	2:1:2:1:A	0:2:33:0:A	1:1:6:1:A	1:1:6:1:A
3287_GGCCGCCGCTGCTTCGTGGAGGCCGCGGAGGTGGG_NODE_2_length_218_cov_7.513762	163	.	G	C	111.75	PASS	NS=8:AN=1:DP=314	GT:DP:GQ:EC:SG	0:25:102:0:G	0/1:33:36:9:S	0/1:31:9:5:G	0:58:201:0:G	0:52:141:0:G	0:33:132:0:G	0:68:204:0:G	0:14:69:0:G
8338_GGCCGTCATGGTCCCGAAACCTTCTGTTGGTCCAG_NODE_2_length_239_cov_7.054393	184	.	C	A,G	32.62	PASS	NS=8:AN=2:DP=144	GT:DP:GQ:EC:SG	0:5:42:0:C	0/1/2:16:36:5,2:M	0/1:39:74:3:C	0/1:39:28:5:C	0/1:12:14:2:C	0/1:8:22:1:C	0/1:17:23:2:C	0/1:8:22:1:C
6129_GGCCGGCGGCCACAGAGTGGCTGAGGCGCCGATTC_NODE_2_length_200_cov_8.005000	144	.	A	G	34.12	PASS	NS=8:AN=1:DP=92	GT:DP:GQ:EC:SG	0/1:10:44:5:R	0:20:87:0:A	0:16:75:0:A	0/1:16:0:5:A	0/1:13:19:4:R	0/1:5:23:1:A	0/1:6:3:2:A	0/1:6:22:4:R
62_GGCCGGAGGGCTCGGGAATGGAGCTGGACGGCTGC_NODE_2_length_214_cov_11.509346	38	.	C	T	35.25	PASS	NS=8:AN=1:DP=80	GT:DP:GQ:EC:SG	1:1:6:1:C	0:18:81:0:C	0/1:25:63:12:Y	0/1:20:53:10:Y	0:4:39:0:C	1:1:9:1:C	0/1:9:22:4:Y	0/1:2:9:1:C
6376_GGCCGCTCCCGACTACAAACGTCGGCTTGGCCGGG_NODE_2_length_315_cov_10.653968	244	.	A	G	104.75	PASS	NS=8:AN=1:DP=230:AS=CAACGAATGTCACATATCAATATCTGCATTAGTTGGTTAATAAGAAACTA[A/G]TTTGCTCTGTAAACCGTCACCTAAACCACACACACACAAAAAGAACCGAA	GT:DP:GQ:EC:SG	0/1:23:34:6:R	0:15:72:0:A	0:27:108:0:A	0:66:216:0:A	0:41:153:0:A	0:20:87:0:A	0:28:111:0:A	0:10:57:0:A
5519_GGCCGTCCGTGGGAGGCAGTGGTTTAAGAAGAGGC_NODE_2_length_317_cov_14.580441	105	.	C	A	81.5	PASS	NS=8:AN=1:DP=201:AS=TTTCATAAGAATTCAATAAAGAAAAAGGTATAGGAAAACTATATTGCTGC[C/A]GTACCTCCTAACTAGTAACTTAGGAAAGGGAGCTGTTACTACTCCCCAGG	GT:DP:GQ:EC:SG	1:6:15:6:A	0/1:51:90:24:M	0:82:226:0:C	0:17:78:0:C	0:12:63:0:C	0:10:57:0:C	0/1:20:87:11:M	0:3:36:0:C
4962_GGCCGAGTGCCATGGGCAGAAACATTGACACATAC_NODE_3_length_173_cov_4.890173	83	.	C	T	36.38	PASS	NS=8:AN=1:DP=239	GT:DP:GQ:EC:SG	1:1:1:1:C	0/1:98:68:40:Y	0/1:54:16:11:C	0/1:27:48:8:Y	0/1:22:39:3:C	0/1:16:17:4:Y	0/1:19:69:10:Y	0:2:33:0:C
3104_GGCCGGGGAGCCGGAGAGGCCAAGTACAAAGCGCC_NODE_2_length_294_cov_17.064627	276	.	C	T	46.43	PASS	NS=7:AN=1:DP=100	GT:DP:GQ:EC:SG	1:2:3:2:T	.:0:0:0:.	0/1:19:51:13:Y	0/1:17:34:5:Y	0:26:105:0:C	1:5:12:5:T	0/1:19:79:13:Y	0/1:12:41:9:Y
5480_GGCCGCTTTCCCAAGCCCTTCCAGCTCAAACTATG_NODE_2_length_286_cov_7.506993	261	.	A	C	60.14	PASS	NS=7:AN=1:DP=180	GT:DP:GQ:EC:SG	0/1:42:77:25:M	0/1:29:67:13:M	.:0:0:0:.	0:18:56:0:A	0:27:70:0:A	0/1:6:26:1:A	0/1:8:23:1:A	0/1:50:102:26:M
6848_GGCCGCCGGCGCAGGCCGGGGCGGGACGGGTGAGT_NODE_2_length_316_cov_15.319620	56	.	G	A	32	PASS	NS=7:AN=1:DP=74:AS=GCTTTATTTTCTGTCTTCCCCCACTAGAATGTAAGCTCCACAGAGCAAAG[G/A]GGGCCCTGTCTGCTTAGTACAGTGAAAGTACTAAAAAATCAGTGTTGATA	GT:DP:GQ:EC:SG	.:0:0:0:.	1:26:75:26:A	1:20:60:20:A	0/1:4:23:3:R	1:10:27:10:A	1:2:3:2:A	1:11:30:11:A	1:1:6:1:G
3633_GGCCGCCATCTTTCTCCGTCTCTCTACGGAAGCCT_NODE_2_length_215_cov_8.186047	211	.	A	T	8.17	q10	NS=6:AN=1:DP=21	GT:DP:GQ:EC:SG	1:3:6:3:T	1:2:3:2:T	.:0:0:0:N	1:10:27:10:T	1:2:3:2:T	1:1:4:1:A	1:3:6:3:T	.:0:16:0:A
3252_GGCCGCCGGCTCCTAAGTCCCTGGGGGCTCTGCTG_NODE_2_length_376_cov_13.074468	289	.	C	G	65	PASS	NS=8:AN=1:DP=589	GT:DP:GQ:EC:SG	0/1:96:83:41:S	0/1:25:88:13:S	0/1:65:52:19:S	0/1:90:34:15:C	0/1:102:46:32:S	0/1:44:54:13:S	0/1:80:107:7:C	0/1:87:56:29:S
4372_GGCCGGCGCGCTGGCGCTGACGGCGGGCGGGAATG_NODE_2_length_322_cov_7.726708	173	.	A	T,G	43.38	PASS	NS=8:AN=2:DP=382:AS=CCCTGGAGAAGGACATCATGCTTGGCAGAGTACAGGGTCAGCGGAAAAGA[A/T,G]GAAGACCCTCAACGAGGTGGATTGACACAGTGGCTGAACCAATAGGCTCA	GT:DP:GQ:EC:SG	0:19:60:0:A	0/2:65:47:15:R	0/2:61:51:8:A	0/2:62:29:18:R	0/2:47:10:8:A	0/2:31:21:5:A	0/2:80:113:9:A	0/1/2:17:16:3,4:R
5454_GGCCGGACGTCGCCCAGGGCTAAGGGCAGCTGGAG_NODE_2_length_285_cov_3.768421	197	.	T	C	88.62	PASS	NS=8:AN=1:DP=259:AS=AGGAAGACAGGGTGGACTGGAAATAGGGGGAGGAGAGCTCAACCCCACTC[T/C]GTGAATCCTCACGACCTCCCACCAATTCCAGCTCAGTTTCCAATTCCAGG	GT:DP:GQ:EC:SG	0:14:69:0:T	0:37:138:0:T	0:41:150:0:T	0/1:68:81:30:Y	0/1:28:76:21:Y	0:15:72:0:T	0/1:50:78:21:Y	0:6:45:0:T
6474_GGCCGAGGCAACTCAAATCACAGTGGATCTGAAGA_NODE_2_length_273_cov_7.849817	208	.	C	T	34.25	PASS	NS=8:AN=1:DP=110	GT:DP:GQ:EC:SG	0/1:13:13:2:C	0:9:54:0:C	0:2:33:0:C	0/1:34:33:7:Y	0/1:19:56:6:Y	0:4:39:0:C	0/1:16:13:2:C	0/1:13:33:1:C
9315_GGCCGTTAATGACGTCTAAGCGCAGCGCCGAGCTC_NODE_2_length_293_cov_12.259386	76	.	A	G	64.75	PASS	NS=8:AN=1:DP=106	GT:DP:GQ:EC:SG	0:11:60:0:A	0:31:120:0:A	0:21:90:0:A	0:17:81:0:A	0:7:48:0:A	0/1:10:38:4:R	0:6:45:0:A	0:3:36:0:A
3063_GGCCGGTCCCGCGAAGGTCTGCGCAACGCGGGGGG_NODE_2_length_309_cov_9.320389	46	.	T	C	9.57	q10	NS=7:AN=1:DP=26	GT:DP:GQ:EC:SG	1:1:0:1:C	1:8:21:8:C	1:5:12:5:C	0/1:3:16:2:Y	1:5:12:5:C	1:1:0:1:C	1:3:6:3:C	.:0:0:0:.
8206_GGCCGAGCCTTTGCGCCCCCTCCCGAGAGGGCCCG_NODE_2_length_173_cov_7.121387	164	.	T	C	17.57	PASS	NS=7:AN=1:DP=32	GT:DP:GQ:EC:SG	0/1:7:28:4:Y	1:2:3:2:C	0/1:6:26:3:Y	0/1:9:24:2:T	0/1:3:3:2:Y	1:2:3:2:C	0:3:36:0:T	.:0:0:0:N
4511_GGCCGGGTATTTGCATAGAACGTTATCCGCGGAAT_NODE_6_length_134_cov_4.917911	118	.	G	C	17.5	PASS	NS=6:AN=1:DP=66	GT:DP:GQ:EC:SG	.:0:0:0:N	0/1:31:26:5:G	0/1:18:20:7:S	0/1:7:10:3:S	0:1:30:0:G	0/1:2:12:1:G	0/1:7:7:2:G	.:0:0:0:.
281_GGCCGTGGTAGGGGTGTGGGGCTCAGGCAGAAGGA_NODE_2_length_207_cov_6.599034	49	.	C	G	23.25	PASS	NS=8:AN=1:DP=69	GT:DP:GQ:EC:SG	1:1:5:1:C	1:22:63:22:G	1:16:45:16:G	0/1:5:5:4:S	1:9:24:9:G	1:1:5:1:C	1:12:33:12:G	1:3:6:3:G
9259_GGCCGGGAAATACCGCCAACACAGGGCGCTCCGCT_NODE_2_length_271_cov_8.206642	187	.	T	C	62.12	PASS	NS=8:AN=1:DP=210:AS=CAAAAGTGGAAAATTACGGTGTATGCGACTGAGGCAAAAATGACTACAAC[T/C]CCCAGAATGCATTACAGCCCAGACCGGCTTGGAACTGTGCATGCTGGGAT	GT:DP:GQ:EC:SG	1:26:75:26:C	1:16:45:16:C	1:28:81:28:C	0/1:50:41:16:Y	1:26:75:26:C	0/1:19:55:14:Y	1:36:101:36:C	1:9:24:9:C
8772_GGCCGCGGGGCGGTGTGCGCAGCCGCCGGTAGGAA_NODE_2_length_321_cov_18.323988	34	.	G	T	9.83	q10	NS=6:AN=1:DP=24	GT:DP:GQ:EC:SG	.:0:0:0:.	1:7:18:7:T	1:7:18:7:T	1:2:3:2:T	1:2:6:2:T	1:1:2:1:G	1:5:12:5:T	.:0:0:0:N
1468_GGCCGGGCAGAGCTGCGTTCAGCTTCACAGCCAGG_NODE_2_length_189_cov_25.164021	153	.	T	C	107.12	PASS	NS=8:AN=1:DP=996	GT:DP:GQ:EC:SG	0/1:57:23:15:Y	0/1:259:210:40:T	0/1:191:179:29:T	0/1:145:118:23:T	0:109:177:0:T	0/1:66:32:11:T	0/1:148:90:28:T	0/1:21:28:3:T
5795_GGCCGTTCTCTGAACCCACCAACAGCTCTGAGGGA_NODE_2_length_326_cov_9.343558	80	.	C	T	48	PASS	NS=8:AN=1:DP=80:AS=ACCCCTCCAGTGTGACAATCAAAAATGTCTCCAGACATTTTCAAATGTCC[C/T]CTGGAAAGCAAAATCATCCCTGACTGAAAATTGTTGGGCTTAGTGTGAGG	GT:DP:GQ:EC:SG	1:4:9:4:T	0/1:16:61:9:Y	0/1:15:57:8:Y	0:18:81:0:C	0:4:39:0:C	0:3:36:0:C	0/1:15:59:8:Y	0:5:42:0:C
9750_GGCCGCTCCAGGACAGGAAAGCCAAGGCCACAAGA_NODE_2_length_325_cov_7.452308	223	.	C	T	93.75	PASS	NS=8:AN=1:DP=308:AS=GGTTTCCTAAGCTGTCATCTTGCGGGAGAAAATCACCATGGCTTTTCTCC[C/T]GTGGAGGCATTGCAGGCAAGTGCTTGACCTTTATGCCACCAGGACTCCTT	GT:DP:GQ:EC:SG	0/1:9:25:5:Y	0:9:54:0:C	0:38:141:0:C	0:63:209:0:C	0/1:52:61:19:Y	0/1:25:60:10:Y	1:76:123:76:T	1:36:77:35:T
5834_GGCCGTGCTTTATTCCCCTAGCCGTCCCCTAGGGA_NODE_2_length_216_cov_13.564815	120	.	G	C	104.25	PASS	NS=8:AN=1:DP=275	GT:DP:GQ:EC:SG	0/1:13:55:6:S	0/1:29:55:9:S	0/1:36:41:10:S	0:66:209:0:G	0:45:162:0:G	0/1:16:66:7:S	0:64:201:0:G	0:6:45:0:G
8995_GGCCGTGGCAGGAAGGGAGGTGGGGGAGGAGAAGT_NODE_2_length_272_cov_13.886029	24	.	A	G	18	PASS	NS=8:AN=1:DP=43	GT:DP:GQ:EC:SG	1:2:3:2:G	1:8:21:8:G	1:7:18:7:G	0/1:6:9:2:R	0:11:60:0:A	0/1:4:12:1:A	1:2:3:2:G	0/1:3:18:2:R
8290_GGCCGGTGCCGGCCCAAGGAGAGGCCGGAAGAAGG_NODE_2_length_231_cov_10.411256	28	.	C	A	23.14	PASS	NS=7:AN=1:DP=61	GT:DP:GQ:EC:SG	1:7:18:7:A	1:7:18:7:A	1:25:72:25:A	1:6:15:6:A	1:3:6:3:A	1:7:18:7:A	1:6:15:6:A	.:0:0:0:N
3944_GGCCGACAGATGGAGTCATTCCCTCCCTCCCCTGA_NODE_2_length_341_cov_22.894428	326	.	T	C	44.12	PASS	NS=8:AN=1:DP=82	GT:DP:GQ:EC:SG	0/1:9:5:2:T	0:1:30:0:T	0/1:7:8:6:Y	0:11:60:0:T	0:14:69:0:T	0:12:63:0:T	0/1:15:68:9:Y	0/1:13:50:6:Y
2518_GGCCGCGGGGTCCTCTCGGGTCGTCCCCGCGGACA_NODE_2_length_303_cov_7.986799	67	.	A	G	36.75	PASS	NS=8:AN=1:DP=111:AS=TGGAAGGAGGGAGGGGTGCGGAAAGGACACAAAGAGGGCTCTTAAGCCTT[A/G]ATCCTGTGTACTTTTGCAGGCTCCTGTTCCAAAATCCTGAATTAATCTGG	GT:DP:GQ:EC:SG	1:5:12:5:G	1:27:81:27:G	1:29:84:29:G	0/1:9:3:8:R	1:17:48:17:G	1:7:18:7:G	1:14:42:14:G	1:3:6:3:G
7382_GGCCGGGTCCTTTTTATGGAGTTCCTGTAATTACC_NODE_2_length_219_cov_9.488585	200	.	A	G	31.25	PASS	NS=8:AN=1:DP=36	GT:DP:GQ:EC:SG	0/1:6:29:4:R	1:1:8:1:A	0:2:36:0:A	0:18:81:0:A	0/1:2:12:1:A	1:1:9:1:A	0:5:45:0:A	0:1:30:0:A
10673_GGCCGCCTCGGCGTCTGTCTAGCTCAGGCTCACAC_NODE_2_length_320_cov_10.959375	276	.	A	C	44.75	PASS	NS=8:AN=1:DP=131:AS=CTCTTTTGCCCTTGTCCCCGAATGCCTAGCAGGGGGCTGGGTTCACTCGG[A/C]AAGGCTCTTATCTTTTGGAACCTCACTCTTTCTGATCAGGCTGAAACAAA	GT:DP:GQ:EC:SG	0/1:8:46:5:M	1:3:6:3:C	0/1:25:46:19:M	0/1:30:43:11:M	0/1:13:32:10:M	0/1:10:29:4:M	0:34:132:0:A	1:8:24:8:C
5986_GGCCGCACAAGCCAATCACTTTAGCAACACTCAGC_NODE_2_length_199_cov_6.673367	79	.	A	G	35.5	PASS	NS=6:AN=1:DP=35:AS=TTCTGAAGGCTGCTTTTAGGGAGTGGTTTCATCAGCTTTTTGGGACAGTA[A/G]CTTGAAAGAAAGAAATGGTTTCTCTAAATAGTCGAACTTAATTTAAAAAA	GT:DP:GQ:EC:SG	.:0:0:0:.	0:11:60:0:A	0/1:6:19:5:R	0:10:57:0:A	.:0:0:0:.	0:3:36:0:A	0:2:33:0:A	0/1:3:8:1:A
7656_GGCCGTGTCCTGTCGTCTTGCCTCCTAGGACCCCC_NODE_2_length_169_cov_7.289941	115	.	A	G	78	PASS	NS=8:AN=1:DP=178:AS=CACACAATAGAAACATGGGGACTTTGAAGGAAGGAGGGCAGCGGTGGGCT[A/G]CCTGTAGAAGGGCATCATGTCCACATGCAGGGCGGGCAACCACAGTGCCT	GT:DP:GQ:EC:SG	0/1:14:30:5:R	1:20:57:20:G	0:37:138:0:A	0/1:34:72:13:R	0:27:111:0:A	0:16:75:0:A	0:24:99:0:A	0/1:6:42:4:R
3506_GGCCGGTCTGGAAACGGGGGTCTTAGAGCGCCGAT_NODE_2_length_290_cov_26.575863	282	.	C	T	13.17	PASS	NS=6:AN=1:DP=20	GT:DP:GQ:EC:SG	1:6:15:6:T	.:0:0:0:.	.:0:0:0:.	0:1:30:0:C	1:2:3:2:T	1:1:7:1:C	1:6:15:6:T	1:4:9:4:T
7018_GGCCGCACGGTGTTCTGAGATAACCGTATTCTCAG_NODE_2_length_268_cov_30.902985	10	.	G	C	6.67	q10	NS=6:AN=1:DP=8	GT:DP:GQ:EC:SG	1:1:3:1:G	1:2:3:2:C	.:0:0:0:N	1:2:3:2:C	1:1:1:1:G	1:1:15:1:G	.:0:0:0:.	1:1:15:1:G
9698_GGCCGGGGCGGATAGGGCGGACCAGCTCGGCTTCC_NODE_2_length_334_cov_28.595808	185	.	A	C	173.25	PASS	NS=8:AN=1:DP=633:AS=ACACCCAGACCACAAAAGCCACAAAGGAAAGGGGAAATGAGGATAATCTT[A/C]GTGAGGTCTAACGCATTACTAGGAATGTCTCAATCTCCACTTCAATCCTC	GT:DP:GQ:EC:SG	0/1:49:63:4:A	0:122:240:0:A	0:102:229:0:A	0:86:221:0:A	0:82:214:0:A	0:42:153:0:A	0:125:238:0:A	0/1:25:28:5:M
2079_GGCCGCTCAGATCACCCAGCGCAAGTGGGAAGAGG_NODE_2_length_283_cov_4.540636	118	.	G	A,T	20.29	PASS	NS=7:AN=2:DP=58	GT:DP:GQ:EC:SG	0/1:4:15:1:G	0:19:59:0:G	0/1:4:22:1:G	0/1:11:9:2:G	0/1:8:13:7:R	1:1:3:1:G	0/1/2:11:21:4,1:R	.:0:0:0:.
535_GGCCGGAAGCGGAAGTCCTCATCAAAAAGTTTAGC_NODE_2_length_249_cov_5.730924	245	.	C	G	33.14	PASS	NS=7:AN=1:DP=45	GT:DP:GQ:EC:SG	0/1:3:13:1:C	.:0:0:0:.	0/1:9:26:7:S	0:8:51:0:C	0:10:60:0:C	0:1:30:0:C	0/1:11:34:5:S	0/1:3:18:1:C
4286_GGCCGGGCTGCTCCGGCCTCCGCGCCACGGGAACA_NODE_2_length_150_cov_9.606667	57	.	T	G	50.25	PASS	NS=8:AN=1:DP=121	GT:DP:GQ:EC:SG	0/1:10:64:6:K	0:18:51:0:T	0:23:96:0:T	0/1:25:25:3:T	0/1:14:42:5:K	0:3:36:0:T	0/1:22:40:2:T	0:6:48:0:T
2476_GGCCGGGGCTGCGGCTCTGGGAACTCCACCCCACC_NODE_2_length_246_cov_19.703253	183	.	C	G	98.62	PASS	NS=8:AN=1:DP=273	GT:DP:GQ:EC:SG	1:23:66:23:G	0:19:84:0:C	1:25:75:25:G	0:91:220:0:C	1:29:87:29:G	0/1:39:93:24:S	0:35:135:0:C	0/1:12:29:5:S
3252_GGCCGCCGGCTCCTAAGTCCCTGGGGGCTCTGCTG_NODE_2_length_376_cov_13.074468	67	.	A	C,G	44.38	PASS	NS=8:AN=2:DP=184	GT:DP:GQ:EC:SG	0:1:30:0:A	0/2:67:75:41:R	0/2:63:75:37:R	0:12:58:0:A	0/1/2:12:3:1,2:A	0/2:10:23:4:R	0/2:18:61:10:R	0:1:30:0:A
4052_GGCCGCCCCGCGAGTTGTGCGGCGGAGCGAGTTTG_NODE_2_length_292_cov_9.934932	224	.	A	G	37.38	PASS	NS=8:AN=1:DP=83:AS=GAGTTTTGTTACTTGCTTTGGAAAGCCCGGGAACCTAAAGCTCTGCTCCT[A/G]GTGAGGTTTGCTGTTCCAGGATCCCACCGCTGCTCGCCTCGTGTGTTCGC	GT:DP:GQ:EC:SG	0/1:11:48:5:R	0:2:33:0:A	0/1:12:12:3:R	0/1:19:77:9:R	0:8:51:0:A	1:6:4:6:G	0/1:9:29:1:A	1:16:45:16:G
10403_GGCCGGGAGGAGAGAACAACGGCAAGGGGGGCACT_NODE_2_length_285_cov_24.319298	82	.	C	T	120.62	PASS	NS=8:AN=1:DP=269:AS=GCGTTGTGTCACTTACATTTTAAATGCGCTTTCACATGCCGCCTTCCTTG[C/T]GACCTATATTATGCGCCAGTTGGGAAGAGCAGAGCAGCAGCATCCTCTTT	GT:DP:GQ:EC:SG	0:28:111:0:C	0:66:210:0:C	0:59:205:0:C	0:48:171:0:C	1:20:57:20:T	0/1:5:28:3:Y	0:42:153:0:C	0:1:30:0:C
6094_GGCCGAGAAGGTCCCGCATGGGACTGTAGAGGGAC_NODE_3_length_237_cov_19.763714	186	.	C	T	58.88	PASS	NS=8:AN=1:DP=955	GT:DP:GQ:EC:SG	0/1:143:4:41:Y	0:5:42:0:C	0/1:70:43:11:C	0/1:216:89:49:C	0/1:168:71:36:C	0/1:132:154:17:C	0/1:104:20:32:Y	0/1:117:48:24:C
2000_GGCCGTGTATTACTGTGCGAAAGACACAGTGAGGG_NODE_5_length_210_cov_20.195238	162	.	G	T	82.75	PASS	NS=8:AN=1:DP=201	GT:DP:GQ:EC:SG	0/1:11:6:2:G	0/1:13:32:4:K	0:14:69:0:G	0:47:171:0:G	0:53:189:0:G	0:16:75:0:G	0:21:90:0:G	0/1:26:30:3:G
6066_GGCCGCCCGCTTCTCTCCCTGCGCCACGCCCCCTC_NODE_2_length_284_cov_11.605634	92	.	C	A	39.86	PASS	NS=7:AN=1:DP=98	GT:DP:GQ:EC:SG	1:10:27:10:A	1:40:123:40:A	1:16:45:16:A	1:11:30:11:A	1:10:27:10:A	.:0:0:0:.	1:9:24:9:A	1:2:3:2:A
8422_GGCCGCGTCCCAGTACAGGTCCTTCTCCAGCATGG_NODE_2_length_210_cov_11.647619	28	.	G	A,T	24.12	PASS	NS=8:AN=2:DP=68	GT:DP:GQ:EC:SG	0/1/2:6:18:1,1:G	0/1:25:40:8:R	0:15:51:0:G	0:8:51:0:G	1:4:9:4:A	1:5:12:5:A	1:4:9:4:A	1:1:3:1:G
5327_GGCCGGTTCCGCAGAGCCCTCCATTTTACCCGTGG_NODE_2_length_216_cov_5.384259	141	.	C	T	21.25	PASS	NS=8:AN=1:DP=72:AS=CAGAAGCCTCCCCTGTTTCATCTCCAGGTTCCCTCTCAGGCCCCTCATAG[C/T]TGTGGTGTGTCTCAGGGGTAGAAAAAAGAGATTTCTTTAAAAGAACACAT	GT:DP:GQ:EC:SG	1:10:27:10:T	1:5:12:5:T	1:15:42:15:T	1:16:20:15:T	1:5:15:5:T	1:9:24:9:T	1:5:12:5:T	1:7:18:7:T
9944_GGCCGCCAAGAGGAGGCTCCTTAAGGAGCGGATCT_NODE_2_length_246_cov_7.756098	219	.	C	A	32.25	PASS	NS=8:AN=1:DP=299	GT:DP:GQ:EC:SG	0/1:14:45:6:M	0/1:17:57:11:M	0/1:59:29:9:C	0/1:77:43:22:M	0/1:64:19:18:M	0/1:19:33:6:M	0/1:36:4:9:C	0/1:13:28:4:M
8889_GGCCGTGAAGATCTGATTGTCAAACCACAGATGGG_NODE_2_length_267_cov_5.269663	116	.	A	C	11	PASS	NS=8:AN=1:DP=36	GT:DP:GQ:EC:SG	1:2:3:2:C	1:15:42:15:C	1:8:21:8:C	1:2:6:2:C	1:3:6:3:C	1:1:1:1:A	1:3:6:3:C	1:2:3:2:C
1468_GGCCGGGCAGAGCTGCGTTCAGCTTCACAGCCAGG_NODE_2_length_189_cov_25.164021	87	.	G	A,C	45.88	PASS	NS=8:AN=2:DP=818	GT:DP:GQ:EC:SG	0/1/2:12:7:1,2:G	0/2:278:41:97:S	0/2:186:42:64:S	0/2:105:63:39:S	0/2:85:27:24:S	0/2:40:80:17:S	0/2:101:74:40:S	0/2:11:33:1:G
587_GGCCGGTGGGAGAGGATCGGAACCACTGCCCGAGG_NODE_2_length_249_cov_6.502008	40	.	T	C	44.38	PASS	NS=8:AN=1:DP=70	GT:DP:GQ:EC:SG	1:1:4:1:T	0:26:105:0:T	0/1:14:67:9:Y	0:5:42:0:T	0:11:60:0:T	0/1:3:9:1:T	0/1:7:32:5:Y	0:3:36:0:T
721_GGCCGTCTAAGATGCATCAGTTGGTCTCAACCCAC_NODE_2_length_165_cov_4.987879	119	.	C	T,G	20.38	PASS	NS=8:AN=2:DP=40	GT:DP:GQ:EC:SG	0/2:5:21:4:S	2:1:2:1:C	1/2:6:12:1,5:K	0/1/2:11:51:1,7:S	0/1:5:35:3:Y	1/2:4:9:1,3:K	2:5:12:5:G	1/2:3:21:1,2:K
1246_GGCCGCGGGCGGCAAGGAGGCGGGCCCGGANCCTG_NODE_2_length_244_cov_5.950819	152	.	A	G	205.75	PASS	NS=8:AN=1:DP=2171	GT:DP:GQ:EC:SG	1:181:203:181:G	1:284:225:284:G	1:365:225:364:G	1:391:225:390:G	1:422:225:422:G	1:145:179:145:G	1:320:225:319:G	1:63:139:63:G
5922_GGCCGTCGAGTCAACTCCAACTCATAGCGACCCTG_NODE_2_length_235_cov_21.200001	94	.	G	A	54	PASS	NS=8:AN=1:DP=133:AS=GCCGTGGTTAAGAGCTCGGCTGACAACTAAAAGATCCGTAGCTGGAATCC[G/A]CCAGCCTCTTCTTGGAAACCCTGTAGGACAGTTCTACTCTGTTACATAGG	GT:DP:GQ:EC:SG	0/1:6:37:4:R	1:36:105:36:A	1:15:45:15:A	0:34:129:0:G	0/1:11:35:8:R	0/1:5:9:4:R	1:23:66:23:A	1:3:6:3:A
404_GGCCGGTTCCGCAGACCCCTCCATTTTACCCAAGG_NODE_2_length_207_cov_6.101449	57	.	C	T	19	PASS	NS=8:AN=1:DP=73	GT:DP:GQ:EC:SG	0/1:3:13:2:Y	0/1:8:12:2:C	0/1:28:43:3:C	0/1:6:1:2:Y	0:6:45:0:C	0/1:16:29:2:C	1:3:6:3:T	0/1:3:3:2:Y
3408_GGCCGGTTCTAGGGCCCCCAGAACTTCCAACTTTA_NODE_2_length_347_cov_12.729107	124	.	T	C	56.75	PASS	NS=8:AN=1:DP=153:AS=TCGCGGTCAGGTAAAAGCAGATGTGTATGTTAAAGTCGGGGTCGAATACA[T/C]TAAAAACAAGGTCCAAAAGGCTGGGAGCGCAGCACTCGAGACTCTGAGTC	GT:DP:GQ:EC:SG	0/1:4:13:2:Y	0/1:32:67:11:Y	0:31:120:0:T	0/1:35:58:11:Y	1:13:39:13:C	0/1:13:55:7:Y	0:22:93:0:T	0/1:3:9:1:T
329_GGCCGGTTTAAAGAGCTACTACAACAGGGGCTCTA_NODE_11_length_141_cov_4.758865	57	.	T	C	31	PASS	NS=6:AN=1:DP=60	GT:DP:GQ:EC:SG	.:0:0:0:.	0/1:31:109:18:Y	0/1:16:52:12:Y	0/1:6:13:1:T	1:2:3:2:C	1:3:6:3:C	1:2:3:2:C	.:0:0:0:.
10452_GGCCGAGCTTCCCTGAGCTTCAGGTGGTGAGGAGG_NODE_2_length_232_cov_19.176723	83	.	T	C	107.75	PASS	NS=8:AN=1:DP=252:AS=CCTTCTCCAAGAGCACTCCTCTGGCTCCCAGGGCCCCGAGGGGAGAGGAA[T/C]TTGCAAAAGAAAGATATGCTTATAACTGCAAGCCCGGGCAACTTCTGGTT	GT:DP:GQ:EC:SG	1:17:48:17:C	0:56:196:0:T	0:58:189:0:T	0:38:144:0:T	0:42:156:0:T	0/1:18:63:10:Y	1:20:60:20:C	0/1:3:6:2:Y
6701_GGCCGTGTTCAGCTGTATTCAATTCTTTTCTACTC_NODE_1_length_204_cov_52.245098	74	.	T	C	32.38	PASS	NS=8:AN=1:DP=370	GT:DP:GQ:EC:SG	0/1:13:3:3:T	0/1:116:34:48:Y	0/1:85:19:28:Y	0/1:36:50:19:Y	0/1:44:49:23:Y	0/1:20:46:12:Y	0/1:49:52:22:Y	0/1:7:6:2:T
7127_GGCCGTAGCTACACAATTTTCCCTTCCTGTCATGA_NODE_2_length_272_cov_25.937500	258	.	A	G	39	PASS	NS=8:AN=1:DP=46	GT:DP:GQ:EC:SG	0:10:57:0:A	0:1:30:0:A	0:3:36:0:A	0:9:54:0:A	0/1:7:20:3:R	0:1:30:0:A	0:2:33:0:A	0/1:13:52:6:R
10094_GGCCGAGTTCAGCCACACAATGGCGCGCGCGCGCG_NODE_3_length_286_cov_10.195805	92	.	C	T	100.5	PASS	NS=8:AN=1:DP=207:AS=AACAGAGCGTGATCCAATCGGTGAAGGCAGTCTCGTTTTAAGGGGCCAAT[C/T]ATAGGCCACGGTGACCTATTATGACAACCTCGGGAGCCAATGAAAACCAC	GT:DP:GQ:EC:SG	0:22:93:0:C	0:40:147:0:C	0:50:178:0:C	0:30:117:0:C	0:36:141:0:C	0:9:54:0:C	0:14:72:0:C	0/1:6:2:5:Y
10847_GGCCGCAAAGACCCAGCCCCTTCGGCGTTGCTATG_NODE_2_length_224_cov_10.964286	125	.	C	T	105.25	PASS	NS=8:AN=1:DP=345	GT:DP:GQ:EC:SG	0:27:108:0:C	0/1:53:104:30:Y	0/1:74:26:16:Y	0:68:208:0:C	1:36:105:36:T	0/1:23:72:9:Y	0:45:162:0:C	1:19:57:19:T
4492_GGCCGGGTACACTTGGTCTTCAATACCTGCCGGAG_NODE_2_length_269_cov_11.356877	47	.	G	A	25.88	PASS	NS=8:AN=1:DP=80	GT:DP:GQ:EC:SG	1:1:1:1:G	1:28:68:27:A	1:20:57:20:A	1:7:18:7:A	1:8:24:8:A	1:5:12:5:A	1:8:21:8:A	1:3:6:3:A
2115_GGCCGGTGGGTCCCTGGCCCCCGCGGCGCCACGTG_NODE_2_length_280_cov_10.939285	16	.	C	T	29.71	PASS	NS=7:AN=1:DP=25	GT:DP:GQ:EC:SG	0:1:30:0:C	0:9:54:0:C	0/1:4:13:1:C	0:4:39:0:C	.:0:0:0:.	0:1:30:0:C	1:5:12:5:T	0:1:30:0:C
5327_GGCCGGTTCCGCAGAGCCCTCCATTTTACCCGTGG_NODE_2_length_216_cov_5.384259	53	.	C	T	38.5	PASS	NS=8:AN=1:DP=107	GT:DP:GQ:EC:SG	0:11:60:0:C	0/1:23:19:5:Y	0:13:66:0:C	0/1:18:1:3:C	0:12:63:0:C	0/1:13:4:3:Y	0/1:11:50:5:Y	0:6:45:0:C
4867_GGCCGACGCGTGGAGACCACGAGGCCTCTCCCTTC_NODE_2_length_291_cov_11.374571	119	.	G	C	81.75	PASS	NS=8:AN=1:DP=190:AS=GATAGAGAGCGCACTGCTTCTTCCCTGGCACCCAGAGCCTGTGGGGCTCA[G/C]AAAGGGCACAGAGTACGGCCACATGTCCCCTCAACACATGCACAAGGGTC	GT:DP:GQ:EC:SG	0:11:60:0:G	0:38:141:0:G	0:39:144:0:G	0:19:84:0:G	0/1:23:45:18:S	0/1:9:33:5:S	1:45:132:45:C	1:6:15:6:C
11170_GGCCGTTGGAGCTGGCCAATGGGCGCCGGGGGCAG_NODE_2_length_341_cov_24.791788	81	.	C	G	53.38	PASS	NS=8:AN=1:DP=204	GT:DP:GQ:EC:SG	0/1:5:3:3:C	0/1:67:94:36:S	0/1:58:87:31:S	0/1:21:70:11:S	0/1:15:73:10:S	0/1:3:10:2:S	0/1:33:57:11:S	0:2:33:0:C
7654_GGCCGTGCTGCCCGCGGGCCTAGGCGTCGCTCCGC_NODE_2_length_229_cov_5.139738	62	.	G	A	57.88	PASS	NS=8:AN=1:DP=103:AS=CCGTGGAAAGGTGCTCCACGAAGTATCGGCAGTGACTGGCTTACAGTGAC[G/A]TCATAAGGGAACAAAAGAAGCTTATTTCAGATGGGTTTATACAATTTACT	GT:DP:GQ:EC:SG	0/1:13:26:4:R	0:7:48:0:G	0:21:90:0:G	0:19:84:0:G	0:14:69:0:G	1:5:12:5:A	0/1:21:98:13:R	0:3:36:0:G
4098_GGCCGAGGCTGAGGATGATGGTAGATTGCCAGGTG_NODE_2_length_162_cov_9.944445	21	.	C	A	16.57	PASS	NS=7:AN=1:DP=43	GT:DP:GQ:EC:SG	.:0:0:0:.	1:6:15:6:A	1:10:27:10:A	0/1:4:17:3:M	1:3:6:3:A	1:6:15:6:A	1:12:33:12:A	1:2:3:2:A
5480_GGCCGCTTTCCCAAGCCCTTCCAGCTCAAACTATG_NODE_2_length_286_cov_7.506993	156	.	C	T	41	PASS	NS=8:AN=1:DP=271	GT:DP:GQ:EC:SG	0/1:25:6:5:C	0/1:119:64:84:Y	0/1:21:26:6:Y	0:40:104:0:C	0/1:23:29:3:C	0:9:54:0:C	0/1:22:16:5:Y	0/1:12:29:2:C
467_GGCCGTCGCTCCGCGGCCTCCGAGCGCGTTGGTGC_NODE_2_length_254_cov_6.893701	229	.	T	C	29.86	PASS	NS=7:AN=1:DP=36	GT:DP:GQ:EC:SG	1:1:11:1:T	.:0:0:0:.	1:7:18:7:C	0/1:7:36:4:Y	1:6:18:6:C	0:6:45:0:T	0:8:51:0:T	0:1:30:0:T
2628_GGCCGGGCGGGAGGAGTGAGCTGGCGGGCGGAACG_NODE_2_length_269_cov_20.052044	242	.	C	T	65.12	PASS	NS=8:AN=1:DP=122	GT:DP:GQ:EC:SG	0/1:16:11:14:Y	0:2:33:0:C	0:22:93:0:C	0:35:132:0:C	0:21:93:0:C	0:8:51:0:C	0:9:54:0:C	0:9:54:0:C
3107_GGCCGAAGCTGTGGAGGTGGGTGTTACAGTGATAC_NODE_2_length_265_cov_13.992453	190	.	A	G	83.38	PASS	NS=8:AN=1:DP=216:AS=AGAGGTTCTAATGGGTATTGGGGGCCCCCAGGATTTTAGAACCAAATGGG[A/G]CCTTGTAGAATTATCTAGTCCAACCCCCGTCCCCATTTTATGTATGAGGA	GT:DP:GQ:EC:SG	0/1:15:48:7:R	1:23:69:23:G	1:18:51:18:G	0:54:196:0:A	1:54:107:54:G	0:13:66:0:A	1:32:93:32:G	0/1:7:37:4:R
7408_GGCCGGTAGGGGGCGCTACATCTGCTCTTTGTCTT_NODE_2_length_253_cov_12.280632	44	.	G	A	87.38	PASS	NS=8:AN=1:DP=176	GT:DP:GQ:EC:SG	0:11:60:0:G	0:42:153:0:G	0:44:159:0:G	0/1:15:27:5:R	0:19:84:0:G	0:11:60:0:G	0:29:114:0:G	0:5:42:0:G
1450_GGCCGAGGGGGCGGCGCCCTCTGGTGGCAGATTGC_NODE_2_length_313_cov_11.702875	26	.	C	T	14.14	PASS	NS=7:AN=1:DP=38	GT:DP:GQ:EC:SG	.:0:0:0:.	1:11:30:11:T	1:7:18:7:T	1:8:21:8:T	1:5:12:5:T	1:2:9:2:T	1:4:9:4:T	1:1:0:1:Y
9977_GGCCGCTGGGGTGCGCTGGGAGGCGAGGCGGCTCC_NODE_2_length_188_cov_8.670213	109	.	C	T	28.38	PASS	NS=8:AN=1:DP=336	GT:DP:GQ:EC:SG	0/1:24:30:3:C	0/1:52:22:13:Y	0/1:80:3:19:C	0/1:70:47:24:Y	0/1:34:19:9:Y	0/1:10:24:3:Y	0/1:62:43:19:Y	0:4:39:0:C
2504_GGCCGAGTGATTCATCTTGGAGCCTGAGCCTGATG_NODE_5_length_207_cov_19.623188	82	.	A	C	118.62	PASS	NS=8:AN=1:DP=320:AS=TACCAAATTCCCTCCCAGGACCAGATCAAAGCAGGAGCTCCAGGAACAAG[A/C]AGCAAGCTAGGAGCTCCCTGGCTCCCTCACTAGCAGCAGCAGTAATCAAG	GT:DP:GQ:EC:SG	0:19:84:0:A	0:58:202:0:A	0:53:187:0:A	0/1:60:67:21:M	0/1:43:87:22:M	0:29:114:0:A	0:38:141:0:A	0/1:20:67:9:M
2513_GGCCGCCGCCTCTCCGCACCCTGCCGCGCACAAAG_NODE_2_length_243_cov_7.991769	112	.	A	C	22.12	PASS	NS=8:AN=1:DP=292:AS=CTTTGTTCTCTTGATATGAACATTCTGAAAGATGAGGACCACAGCTTTCC[A/C]TGACCGGGAATTGAACCCGGGTCGCGGCTGTGAAAGTGCCGAATCCTAGC	GT:DP:GQ:EC:SG	0/1:16:30:2:A	0/1:51:38:15:M	0/1:61:2:13:M	0/1:63:23:16:M	0/1:27:17:6:M	0/1:24:32:3:A	0/1:46:22:7:A	0/1:4:13:1:A
1865_GGCCGTGGAGTCAATACCGCTGGTTTATAAGTCAC_NODE_2_length_306_cov_10.833333	22	.	C	A	10	PASS	NS=7:AN=1:DP=32	GT:DP:GQ:EC:SG	.:0:0:0:.	1:13:36:13:A	1:3:6:3:A	0/1:6:7:5:M	1:1:2:1:C	1:1:1:1:C	1:7:18:7:A	1:1:0:1:A
9581_GGCCGCCCATTCAGGTGAGCAGACGGCCCCTGGGG_NODE_2_length_239_cov_4.853557	181	.	A	G	43.12	PASS	NS=8:AN=1:DP=148	GT:DP:GQ:EC:SG	0:4:39:0:A	0/1:24:24:6:R	0:54:101:0:A	0/1:26:51:2:A	0/1:10:41:7:R	0:5:42:0:A	0/1:19:45:2:A	0/1:6:2:2:R
795_GGCCGCCATGTTGCGTCCGGTGGTGCGGCTTGTTG_NODE_2_length_182_cov_8.692307	21	.	G	C	61.88	PASS	NS=8:AN=1:DP=100	GT:DP:GQ:EC:SG	0:6:45:0:G	0/1:6:21:3:S	0:23:96:0:G	0:16:75:0:G	0:11:60:0:G	0:9:54:0:G	0:21:93:0:G	0:8:51:0:G
32_GGCCGTTAACTGAAAAGTTGGAGATTCAAGTCCAC_NODE_2_length_308_cov_14.321428	53	.	C	T	65.88	PASS	NS=8:AN=1:DP=114	GT:DP:GQ:EC:SG	0/1:9:23:3:Y	0:31:120:0:C	0:15:72:0:C	0:19:84:0:C	0:20:87:0:C	0:5:42:0:C	0:12:63:0:C	0:3:36:0:C
6637_GGCCGATATGAATTCAAACCTCAGTGTAGAAATCT_NODE_2_length_286_cov_16.912588	107	.	C	T	44.12	PASS	NS=8:AN=1:DP=258	GT:DP:GQ:EC:SG	1:15:42:15:T	1:25:72:25:T	0/1:47:17:13:Y	0/1:61:1:15:Y	0:40:147:0:C	0/1:17:38:7:Y	0/1:45:9:12:Y	0/1:8:27:4:Y
6664_GGCCGCGCGGCTGGGAGAGCCCTCTCTTCTTGGCC_NODE_2_length_279_cov_6.637993	45	.	C	T	64.57	PASS	NS=7:AN=1:DP=89	GT:DP:GQ:EC:SG	0:2:33:0:C	0/1:24:109:15:Y	0/1:34:112:19:Y	0:11:60:0:C	0:7:51:0:C	0:2:33:0:C	0:9:54:0:C	.:0:0:0:N
9149_GGCCGCTAACCAAAAGGTTGGCAGTTGGAATCCAC_NODE_2_length_211_cov_10.270143	172	.	C	T	42.62	PASS	NS=8:AN=1:DP=143	GT:DP:GQ:EC:SG	0/1:12:37:4:Y	0:20:87:0:C	0:29:114:0:C	0/1:17:1:3:Y	0/1:22:19:5:Y	0:4:39:0:C	0/1:34:2:6:C	0:5:42:0:C
6568_GGCCGCCAGGTGGCAGTGTAGGCCACATGGTACCA_NODE_1_length_227_cov_20.788546	90	.	T	A	101.38	PASS	NS=8:AN=1:DP=244:AS=TGCCCCATCCAGTTACCAGGCTGTACTCTTTATGGAGGCAGGCTGCCACA[T/A]CTTTCTCCTGCAGAGCAGCTGGCGGGTTCCAGGCTCCGACCTTTCGGTTA	GT:DP:GQ:EC:SG	0:20:87:0:T	0:29:120:0:T	0/1:47:91:26:W	0:45:162:0:T	0:38:116:0:T	0:22:96:0:T	0/1:38:97:22:W	0:5:42:0:T
3374_GGCCGGGACTCGGCGTCTGGCTCCCAGGAGCCATC_NODE_2_length_278_cov_4.503597	240	.	G	C	60.5	PASS	NS=8:AN=1:DP=219	GT:DP:GQ:EC:SG	0/1:10:25:5:S	0:14:52:0:G	0/1:28:46:3:G	0/1:79:131:8:G	0/1:36:57:4:G	0:19:75:0:G	0:29:81:0:G	0/1:4:17:1:G
6109_GGCCGCCTGTTTGCGCCGTTTGTAGCAGCCCTTCT_NODE_2_length_308_cov_11.353896	175	.	A	G	88.25	PASS	NS=8:AN=1:DP=281:AS=CCGTCGACCAGGCGGAAAACCACCTCAAAAAACCTATCCACTGGCAGGTA[A/G]ACTAGGGGATGACCTTGGGCAAGTCACCCACCTCTCTGAGCCTCATCTCT	GT:DP:GQ:EC:SG	1:19:45:19:G	1:43:113:43:G	1:28:81:28:G	0:86:225:0:A	0/1:37:70:16:R	0/1:21:75:11:R	0/1:30:49:10:R	0/1:17:48:7:R
8014_GGCCGAAAAAACAAGAGATTTTCAGAAGTCCTGAG_NODE_2_length_279_cov_14.756272	256	.	G	A	67.75	PASS	NS=8:AN=1:DP=158	GT:DP:GQ:EC:SG	0/1:18:79:11:R	1:4:9:4:A	0:14:41:0:G	0/1:35:62:13:R	1:28:84:28:A	0:9:54:0:G	0:33:132:0:G	0:17:81:0:G
9731_GGCCGTCCGCGGTCTTGGGTCTCATTCCAGCCCCT_NODE_2_length_165_cov_13.666667	108	.	A	G	34.71	PASS	NS=7:AN=1:DP=92	GT:DP:GQ:EC:SG	0/1:7:27:1:A	0:10:57:0:A	0/1:31:50:13:R	0/1:9:29:7:R	0/1:12:35:1:A	0/1:8:5:3:R	0/1:15:40:8:R	.:0:16:0:A
711_GGCCGTGGGAGTTCACTTTGGAAGAAAAGTTCGGA_NODE_2_length_233_cov_16.678112	26	.	C	T	7.62	q10	NS=8:AN=1:DP=24	GT:DP:GQ:EC:SG	1:1:6:1:C	1:5:12:5:T	1:6:15:6:T	1:2:3:2:T	1:3:6:3:T	1:1:7:1:C	1:4:9:4:T	1:2:3:2:T
1943_GGCCGGCCTGCTCTGAGGCAGACAGCCACAGAGCC_NODE_2_length_365_cov_12.663013	68	.	T	C	23.83	PASS	NS=6:AN=1:DP=50:AS=GATAGAGTGGAACCACCCCATTGAGTTTCCAAAGAGCACCTGGTGGATTC[T/C]AACTGCCGACCTTTTGGTTAGCAGCTATAGCACCTAATCACTAGCCACCA	GT:DP:GQ:EC:SG	.:0:0:0:.	1:13:36:13:C	1:20:57:20:C	0/1:4:20:3:Y	1:1:0:1:C	1:2:3:2:C	1:10:27:10:C	.:0:0:0:.
2685_GGCCGTGCCACAGCCACGAGCCACAATTTCTTTAC_NODE_2_length_324_cov_19.719135	51	.	G	A	27	PASS	NS=7:AN=1:DP=66	GT:DP:GQ:EC:SG	.:0:0:0:.	1:13:39:13:A	1:25:72:25:A	0/1:5:21:4:R	1:3:6:3:A	1:2:3:2:A	1:15:42:15:A	1:3:6:3:A
6168_GGCCGCGCTGGGACCCACAGGAAGGTGGGGCGATG_NODE_3_length_156_cov_3.243590	99	.	G	A	45.43	PASS	NS=7:AN=1:DP=54	GT:DP:GQ:EC:SG	0:7:48:0:G	0/1:19:96:11:R	0/1:13:51:5:R	0:7:48:0:G	0:4:39:0:G	1:2:3:2:A	0:2:33:0:G	.:0:0:0:.
346_GGCCGGTCCTATGAAATACTTTGCTGTTGTAACAG_NODE_2_length_279_cov_7.272401	95	.	T	G	44.12	PASS	NS=8:AN=1:DP=57:AS=GACGTCGGGAAGTCATCAGCGAATGCACTTACAAACCTTTATCTTCAACA[T/G]CTACTTCCCAGACATTGCAAAATATTTAAATAAGATAGGAAAGTAAGCTA	GT:DP:GQ:EC:SG	0:3:36:0:T	0:17:78:0:T	0/1:7:41:5:K	0:6:45:0:T	0:12:63:0:T	1:2:3:2:G	0:6:45:0:T	0:4:42:0:T
1142_GGCCGTCGGCCTTTCGGTGGTTAGCAGTCAATTGC_NODE_2_length_300_cov_16.549999	81	.	C	A	55.38	PASS	NS=8:AN=1:DP=126:AS=ATGCTTCTATTTTCCTCACCAGTAGGCTGCATTTTAACTGAATGTTGATG[C/A]GATGATTTCTCAGTTCACCACTTCCATTCACTTTACAAATTTCTTCAGAA	GT:DP:GQ:EC:SG	0/1:8:6:2:M	0:29:114:0:C	0:15:72:0:C	0:23:96:0:C	0:16:75:0:C	0/1:9:5:3:M	1:22:63:22:A	0/1:4:12:1:C
5368_GGCCGGGGACTTTGGCTCAGAGCCCGGACCCCCTG_NODE_2_length_340_cov_11.061765	81	.	C	T	9.57	q10	NS=7:AN=1:DP=30:AS=CCAAATGAAAAGCAAAGGGACAAGTGCTATAGGAATTGGAACAACTTAAT[C/T]GCAACAATGCAATGACAATTTTTGATAAGGGTCTCCCAGCACCTTATGCG	GT:DP:GQ:EC:SG	.:0:0:0:.	1:6:15:6:T	1:4:9:4:T	1:7:7:7:T	1:5:12:5:T	1:2:3:2:T	1:5:12:5:T	1:1:9:1:C
3975_GGCCGGGTCAGGGCTGGGCTTTGCGAACGTCTACC_NODE_2_length_255_cov_14.580392	105	.	G	A	87.25	PASS	NS=8:AN=1:DP=258:AS=TCACCACCCCTTCCCCCTCTAACCTCTCTTTGTTTCTTTTCAGACCAATT[G/A]TGTCCAGCAGAAGTTAAAGTTTACTGAACAGTGATTTCACTCACTCAACA	GT:DP:GQ:EC:SG	0/1:23:102:12:R	0/1:72:98:30:R	0/1:62:107:39:R	0/1:28:89:12:R	0/1:28:106:17:R	0:9:57:0:G	0/1:35:109:22:R	0:1:30:0:G
3142_GGCCGGTTTAAAGAGCTACTACAACAGGCGCTCTA_NODE_2_length_242_cov_7.652893	61	.	C	T	52.75	PASS	NS=8:AN=1:DP=163	GT:DP:GQ:EC:SG	0:7:48:0:C	0/1:53:25:12:Y	0:24:99:0:C	0:30:90:0:C	0:14:44:0:C	0/1:6:8:2:Y	0/1:28:78:12:Y	0:1:30:0:C
4665_GGCCGCGGCCCCCGCCATGCTGCCGCCACCTCGTG_NODE_2_length_227_cov_7.889868	124	.	T	C	76	PASS	NS=8:AN=1:DP=133:AS=CCTATAGGGTAGCTATGAGTCTGAATCCACTCGAAGGCAACAGGTTTGGT[T/C]TCGGTTATTTATTTAGGGTAGTAACCTTGGGATTACTTCGAATACATTTT	GT:DP:GQ:EC:SG	0:8:51:0:T	0:26:105:0:T	0:20:87:0:T	0:30:117:0:T	0:24:102:0:T	0:2:33:0:T	0/1:18:71:13:Y	0:5:42:0:T
149_GGCCGTGGACGCGCGCTTTCGCTTCCGATTTCTGG_NODE_2_length_351_cov_9.421653	223	.	G	A	96.25	PASS	NS=8:AN=1:DP=278:AS=ACTGAAATCCAGGTTTAAGCTTATATAGGCTTTTCTCAAAAGGAGCCCTG[G/A]TGGCACGGTAACTAAGCGCTTGGCTAGCAGGTTAGAGGTTGAAACCCACT	GT:DP:GQ:EC:SG	1:26:75:26:A	0/1:64:91:41:R	0:42:156:0:G	0:47:171:0:G	0/1:37:94:22:R	1:23:66:23:A	1:31:96:31:A	1:8:21:8:A
6379_GGCCGGGATCCGGGTGGGGGCGCACGCAGATGGGG_NODE_2_length_354_cov_5.316384	298	.	T	C	61.88	PASS	NS=8:AN=1:DP=173:AS=CCACCAGGTGGCCTGGGCTCAGCTTGACTTGTGAACCAGCCTAAAGCTAA[T/C]CCCTTCATTGACAGCTGGGGAAACCGAGACCCAGAGAGGAGACAGAGTGA	GT:DP:GQ:EC:SG	0/1:25:75:14:Y	0/1:13:39:7:Y	0/1:18:64:10:Y	0/1:25:45:10:Y	1:32:93:32:C	0:9:54:0:T	1:42:98:42:C	1:9:27:9:C
8683_GGCCGGTACTCAGGAAATGTTTGGAGAAGTGAATC_NODE_3_length_168_cov_9.952381	57	.	A	G	24.29	PASS	NS=7:AN=1:DP=94	GT:DP:GQ:EC:SG	.:0:0:0:.	0/1:32:39:11:R	0:19:62:0:A	0/1:20:6:4:A	0/1:3:5:2:R	0/1:10:43:6:R	0/1:6:1:2:A	0/1:4:14:1:A
4401_GGCCGGCTGGAACCGCCGACCTTTCAGTTAGCAGC_NODE_2_length_263_cov_11.768061	167	.	A	G	68.62	PASS	NS=8:AN=1:DP=256:AS=AGGCCTGGCAATTTACTTCCCAAAAATCGGCCACTGAAACCTTATGGAGC[A/G]CAGTTCCATTCTGACACACATGGGGTCGTCATGAGTCAGAGCTGACTTGA	GT:DP:GQ:EC:SG	0:6:45:0:A	0/1:15:70:9:R	1:37:108:37:G	0/1:62:89:23:R	0/1:31:104:16:R	0/1:20:34:6:R	0/1:64:67:20:R	0/1:21:32:5:R
1417_GGCCGCGGGCGGCAAGGAGGCGGGCCCGGATCCTG_NODE_2_length_223_cov_8.937220	196	.	G	C	24.62	PASS	NS=8:AN=1:DP=323	GT:DP:GQ:EC:SG	0/1:39:19:12:S	0/1:3:0:2:S	0/1:36:0:9:S	0/1:103:55:24:G	0/1:47:33:18:S	0/1:30:28:10:S	0/1:43:53:25:S	0/1:22:9:5:G
10019_GGCCGGTGGGGGGGCGCCGTGTGGTGTGTGAGCGT_NODE_2_length_155_cov_3.341935	47	.	A	G	39.25	PASS	NS=8:AN=1:DP=103	GT:DP:GQ:EC:SG	1:7:18:7:G	1:35:102:35:G	0/1:15:66:8:R	0/1:9:3:2:A	0/1:13:59:6:R	0/1:12:54:6:R	0/1:9:5:2:R	0/1:3:7:1:A
7243_GGCCGAGGCCACGCCTATGTGGGTTTGGGACCCTG_NODE_2_length_294_cov_18.765306	145	.	G	C	57.25	PASS	NS=8:AN=1:DP=194:AS=CAGACTGCCACACATTTCCCCTGCGGAGTGGGTGGTGGGTTGGAACTGTC[G/C]ACTTTTCGGTTAGCAGCCGTGCGTTTAATCACTGCGCCACGAGAGCTCTT	GT:DP:GQ:EC:SG	1:11:33:11:C	0/1:44:85:21:S	0/1:8:5:2:S	0/1:44:88:24:S	0/1:29:69:21:S	1:14:39:14:C	0:38:114:0:G	0/1:6:25:1:G
7850_GGCCGCCCACCAACTAACACCACCAGCACCACCGC_NODE_5_length_196_cov_15.479591	94	.	A	G	55	PASS	NS=7:AN=1:DP=149	GT:DP:GQ:EC:SG	0/1:29:91:19:R	.:0:0:0:.	0/1:7:11:6:R	0/1:14:14:4:R	0/1:17:60:13:R	0:10:57:0:A	0/1:13:74:8:R	0/1:59:78:23:R
6786_GGCCGCCTCAGTAGAGGCTGGCACTCCCGCGGGGA_NODE_2_length_299_cov_14.745819	88	.	G	A	65.14	PASS	NS=7:AN=1:DP=100:AS=CCTTAGTTCCACAGGGCGCGACTAACTTCCTATGGCCGCGTAAAGGCGAG[G/A]CGTGCAAGAGCAGATCGAAGGCACCCTGTCTATCCCCTCCCCTGGAAGAG	GT:DP:GQ:EC:SG	0:4:39:0:G	0:22:93:0:G	0:37:138:0:G	0:8:51:0:G	0:7:51:0:G	0/1:5:6:4:R	0:17:78:0:G	.:0:0:0:.
3929_GGCCGCAGAGAGGCGGCGCTTTCGAGGGTCTGGGG_NODE_2_length_314_cov_9.961783	51	.	T	G	19.5	PASS	NS=6:AN=1:DP=45:AS=AAAATGAAAACAAATATTCAGTTGACCAGTTTCTTTCATTTTTGGGGGAG[T/G]AAGGGAATTTCAATTCACAGATACACACGATGAAGACTTAAGATGGAGCA	GT:DP:GQ:EC:SG	.:0:0:0:.	1:16:45:16:G	1:11:30:11:G	1:2:3:2:G	1:5:12:5:G	1:3:6:3:G	1:8:21:8:G	.:0:0:0:.
2932_GGCCGCCCCGCGAGTTGTGCGGCGGAGCGAGGTTG_NODE_2_length_263_cov_9.714828	47	.	G	T	22.83	PASS	NS=6:AN=1:DP=25	GT:DP:GQ:EC:SG	0:1:33:0:G	0:4:39:0:G	0/1:10:8:3:K	0:4:42:0:G	1:3:6:3:T	.:0:0:0:.	0/1:3:9:2:K	.:0:0:0:.
5640_GGCCGCTCAGATCACCCGGCACAAGTGGGAGGCTG_NODE_2_length_297_cov_11.616161	224	.	G	T	60.25	PASS	NS=8:AN=1:DP=116	GT:DP:GQ:EC:SG	0:4:39:0:G	0:6:45:0:G	0:17:81:0:G	0:21:90:0:G	0/1:33:51:11:K	0:4:39:0:G	0:16:75:0:G	0/1:15:62:9:K
6688_GGCCGGGGCGCTCTTTGGCACCTTTTCCTGTCTCA_NODE_2_length_318_cov_26.528301	44	.	C	T	14.17	PASS	NS=6:AN=1:DP=24	GT:DP:GQ:EC:SG	1:2:3:2:T	1:4:9:4:T	1:13:36:13:T	0:1:30:0:C	.:0:0:0:.	1:1:1:1:C	1:3:6:3:T	.:0:0:0:.
6604_GGCCGTGTGAGCACAACCATGGTCTCTGCTGGTGA_NODE_2_length_309_cov_16.365696	236	.	G	A	118	PASS	NS=8:AN=1:DP=295:AS=ATAACAATTACTCATATTTTCAGATCTCCATTTTTTTTAAGTTCCATAAA[G/A]TAGTTCTGTGGAGCTCCAGACTCCAACAGAACACAATTTGAAGATAGATG	GT:DP:GQ:EC:SG	0:24:99:0:G	0/1:20:36:7:R	0/1:26:6:6:R	0:57:199:0:G	0:64:211:0:G	0:34:129:0:G	0:34:129:0:G	0:36:135:0:G
5377_GGCCGGGCAACACTGCATGGGATTTCCTCTGCCAG_NODE_2_length_195_cov_9.220512	54	.	A	C	56.75	PASS	NS=8:AN=1:DP=133	GT:DP:GQ:EC:SG	0/1:14:37:4:M	0/1:12:86:7:M	0:19:84:0:A	0/1:26:48:6:M	0/1:30:78:14:M	0/1:9:34:1:A	0/1:6:29:1:A	0/1:17:58:7:M
8977_GGCCGAGAAGGTCCCGCGTGGGACTGTAGAGGGAC_NODE_1_length_227_cov_23.440529	33	.	G	A	30.38	PASS	NS=8:AN=1:DP=238	GT:DP:GQ:EC:SG	0/1:23:15:4:G	0/1:58:15:15:R	0/1:54:43:8:G	0:30:68:0:G	0/1:19:33:2:G	0/1:21:7:5:R	0/1:29:44:10:R	0/1:4:18:1:G
8977_GGCCGAGAAGGTCCCGCGTGGGACTGTAGAGGGAC_NODE_1_length_227_cov_23.440529	45	.	G	C	57.62	PASS	NS=8:AN=1:DP=358	GT:DP:GQ:EC:SG	0/1:32:74:15:S	0/1:78:58:29:S	0/1:74:75:35:S	0/1:56:80:33:S	0/1:42:80:28:S	0/1:23:46:8:S	0/1:48:33:13:S	0/1:5:15:1:G
3140_GGCCGTGCCTCAGCCCCAGCGATGCCGCAGAGAGA_NODE_2_length_327_cov_15.626911	180	.	G	T	74.62	PASS	NS=8:AN=1:DP=312:AS=TCAACCAGGAACTACAAACGAGCCCCACCAGACAGTAAGGTTCTGTTTGC[G/T]AGAGCAGTATGGAGAGACGGGAGCGTTGGTGTGCGCGATTAAAATGTGAG	GT:DP:GQ:EC:SG	1:22:63:22:T	0/1:51:86:20:K	0/1:61:89:23:K	0:49:148:0:G	1:27:78:27:T	0/1:12:33:4:K	0/1:75:79:28:K	0/1:15:21:4:K
3958_GGCCGAGCGCCGCGCCCAGACTGGGTGGCTTCTTT_NODE_2_length_255_cov_4.349020	85	.	A	C	32.25	PASS	NS=8:AN=1:DP=92:AS=GAGGGCCGAGGGGATGGAGGACAAGGGAGGTACGCTGGGAGACACCGGAT[A/C]GTCCTCGGCACTCTGAGACTTCCCGGGAGAAAAGTTTCCAAAGGCTCTTC	GT:DP:GQ:EC:SG	1:13:36:13:C	1:18:54:18:C	1:13:36:13:C	1:16:45:16:C	1:5:15:5:C	1:9:24:9:C	1:15:42:15:C	1:3:6:3:C
5023_GGCCGGTGATGGATGCAAACCTGCCCCATTTTAGA_NODE_2_length_142_cov_27.119719	144	.	A	G	22.57	PASS	NS=7:AN=1:DP=37	GT:DP:GQ:EC:SG	1:4:9:4:G	0/1:6:24:4:R	0:8:51:0:A	0/1:11:39:5:R	1:1:9:1:A	1:1:11:1:A	1:6:15:6:G	.:0:0:0:.
7548_GGCCGCTTCCCCTGAGCGGGAGGAACGGTAGGCGC_NODE_2_length_297_cov_13.427609	42	.	A	T	17.5	PASS	NS=6:AN=1:DP=41	GT:DP:GQ:EC:SG	.:0:0:0:.	1:19:54:19:T	1:6:15:6:T	1:3:6:3:T	1:2:3:2:T	1:6:15:6:T	1:5:12:5:T	.:0:0:0:.
10950_GGCCGTTTTGAGCGGCTTGCTTTTTCTCCTGGTAG_NODE_4_length_170_cov_8.323529	62	.	A	C	54.29	PASS	NS=7:AN=1:DP=79	GT:DP:GQ:EC:SG	0:6:45:0:A	0:21:90:0:A	0/1:17:29:5:M	0:25:102:0:A	.:0:0:0:.	0:7:51:0:A	0:1:30:0:A	0:2:33:0:A
10233_GGCCGGACGTCTCGTCCCTGGCACCCCGGCACCCA_NODE_3_length_193_cov_7.803109	76	.	C	A	31	PASS	NS=6:AN=1:DP=68:AS=TTTGATGATTCCAATTCTGTCTTCATTTCTGGCATAGTTCAATCTTAACA[C/A]TTCACTCACAAATCTCTTGCCTGAAAACACATTTCTAAATCCCCTCTGAG	GT:DP:GQ:EC:SG	.:0:0:0:.	1:19:54:19:A	1:28:81:28:A	1:3:6:3:A	1:5:12:5:A	1:3:6:3:A	1:10:27:10:A	.:0:0:0:.
2361_GGCCGCGCGGCAAACGGAGTGCCGGAGTCTGTGAC_NODE_2_length_289_cov_11.079585	132	.	T	G	87.5	PASS	NS=8:AN=1:DP=199:AS=CTGACTCAGCCTTTTCTAATCAAGTTTCGGGAAAATTTGTATGGAGACAA[T/G]ATATGCACTAATTAGGCTCTTAACTCAATATGACAAGAGCAAGGAGGGCT	GT:DP:GQ:EC:SG	0/1:17:85:9:K	1:29:84:29:G	0:66:219:0:T	0:23:96:0:T	1:21:60:21:G	0:9:54:0:T	1:29:90:29:G	1:5:12:5:G
4732_GGCCGCACCTTCCTCCCGTGGAAGCTGCTCGGCCC_NODE_3_length_177_cov_27.508474	86	.	C	T	71.88	PASS	NS=8:AN=1:DP=477	GT:DP:GQ:EC:SG	0/1:41:43:11:Y	0:15:46:0:C	0/1:38:66:13:Y	0/1:151:149:18:C	0/1:101:48:17:C	0:54:162:0:C	0/1:51:48:15:Y	0/1:26:13:4:C
6705_GGCCGCGCCCCATGCCGCGAATCAGGTAGTTCTGT_NODE_2_length_232_cov_6.211207	13	.	A	C	22.5	PASS	NS=8:AN=1:DP=67	GT:DP:GQ:EC:SG	1:3:6:3:C	1:9:24:9:C	1:9:24:9:C	1:15:45:15:C	1:12:33:12:C	1:6:15:6:C	1:10:27:10:C	1:3:6:3:C
1263_GGCCGTGTACCTCTGTGCCAGTAGCTTAGCCACAG_NODE_2_length_296_cov_17.766891	166	.	T	C	48.62	PASS	NS=8:AN=1:DP=539	GT:DP:GQ:EC:SG	0/1:28:55:14:Y	0/1:68:53:46:Y	0/1:79:45:33:Y	0/1:85:36:31:Y	0/1:81:49:52:Y	0/1:43:57:21:Y	0/1:122:46:51:Y	0/1:33:48:13:Y
3132_GGCCGGCCGGTTTAAAGAGCTACTACAACAGGGGC_NODE_2_length_211_cov_13.284360	116	.	G	C	37.14	PASS	NS=7:AN=1:DP=30	GT:DP:GQ:EC:SG	0:6:45:0:G	0:2:36:0:G	0:2:33:0:G	0/1:5:20:4:S	0:4:39:0:G	0:3:36:0:G	0:8:51:0:G	.:0:0:0:.
8490_GGCCGCCCGGCCGCCCACCAACTAACACCACCAGC_NODE_2_length_263_cov_13.642586	212	.	A	G	25.5	PASS	NS=8:AN=1:DP=151	GT:DP:GQ:EC:SG	1:6:15:6:G	0/1:9:26:7:R	0/1:21:8:19:G	0/1:45:73:29:R	0/1:48:41:43:G	0/1:5:23:3:R	0/1:13:1:12:R	0/1:4:17:3:R
10196_GGCCGCCGACACGACCGCTCAGATCACCCAGCGCA_NODE_5_length_148_cov_13.804054	38	.	C	G	33.38	PASS	NS=8:AN=1:DP=94	GT:DP:GQ:EC:SG	0:1:30:0:C	0/1:25:6:5:S	0/1:15:65:8:S	0/1:16:42:6:S	0/1:15:3:3:C	0:8:51:0:C	0/1:12:37:5:S	0:2:33:0:C
9898_GGCCGTCTCCCAGGCTTCTGCAGATCCCAGCCGGA_NODE_2_length_269_cov_7.449814	78	.	C	T	25	PASS	NS=7:AN=1:DP=62:AS=AGGGTGGAGATGTGGGTGCCTGAACACATTCTTGAGTATGAGCTACGCCA[C/T]CTTCTTTAAAAGCCCCAGGGCCCGAACGCAGGAGAGAGCCATTCATCATA	GT:DP:GQ:EC:SG	1:5:15:5:T	1:23:78:23:T	1:21:66:21:T	0/1:8:9:7:Y	1:1:1:1:C	1:3:6:3:T	1:1:0:1:C	.:0:0:0:.
7394_GGCCGCTTTCCCTCTGTGGAGGGGCCGAGTAGGTG_NODE_2_length_282_cov_9.865249	34	.	A	C	37.62	PASS	NS=8:AN=1:DP=78	GT:DP:GQ:EC:SG	0:7:48:0:A	0:33:126:0:A	0/1:9:4:8:M	0/1:9:21:1:A	0/1:6:12:2:M	1:1:0:1:M	0/1:12:57:5:M	0:1:33:0:A
7300_GGCCGCGGCTCGAAGTCCCTGGGGGCTCTGCTGCT_NODE_2_length_225_cov_14.080000	27	.	T	C	19.14	PASS	NS=7:AN=1:DP=67	GT:DP:GQ:EC:SG	1:6:15:6:C	1:9:24:9:C	0/1:12:13:11:C	1:8:21:8:C	0/1:14:13:12:Y	1:8:21:8:C	1:10:27:10:C	.:0:0:0:.
2570_GGCCGCATCTTTCTCAGGGTAGCAGCTAGCGGGTG_NODE_2_length_224_cov_6.200893	142	.	G	C	66.25	PASS	NS=8:AN=1:DP=168:AS=GCTCACAAAGACGCAGTGTGTGCTGTGCTGACTCACGGTGGTTCTGGGCC[G/C]AGGCGAGTCGCTGACTCTGAGGGCCCAGAGGGGCCCCATCTGCTTGGCCA	GT:DP:GQ:EC:SG	1:15:42:15:C	1:2:3:2:C	0:13:66:0:G	0:66:207:0:G	1:25:72:25:C	0/1:8:2:3:S	0/1:27:75:15:S	0:12:63:0:G
11070_GGCCGCCACATCGCAGGAAGCAGACACGCGTGAAA_NODE_2_length_305_cov_7.390164	62	.	G	A	16.86	PASS	NS=7:AN=1:DP=47	GT:DP:GQ:EC:SG	1:1:3:1:G	1:13:36:13:A	1:17:54:17:A	0/1:6:1:5:R	1:6:15:6:A	1:3:6:3:A	1:1:3:1:A	.:0:0:0:.
4894_GGCCGGGGAGTTTGTGTCGCCTCTGTCGCTGCGGA_NODE_2_length_273_cov_10.227106	192	.	A	G	119.5	PASS	NS=8:AN=1:DP=417:AS=GCGAGGAGGAGTCAGAAGAGAAATGAGACTAGAAAGGATAGGTGACAGAA[A/G]AGCCAAAACTCTCAGAGAGCCCAGAGGGTTGCACGCAGGGTCTCCACTGA	GT:DP:GQ:EC:SG	0:24:99:0:A	0:44:159:0:A	0/1:48:49:38:R	0:106:236:0:A	0:83:221:0:A	0/1:35:40:11:R	0/1:59:71:29:R	0:18:81:0:A
2346_GGCCGCCGTCTCTCCGCACGCTGCCACGCGCAAGG_NODE_2_length_251_cov_5.250996	241	.	T	C	15.43	PASS	NS=7:AN=1:DP=21	GT:DP:GQ:EC:SG	1:3:6:3:C	.:0:30:0:T	0:3:36:0:T	0/1:5:1:2:Y	0/1:3:6:2:Y	0:3:36:0:T	0/1:2:8:1:T	0/1:2:15:1:T
3822_GGCCGCGTAGGTGGGCCGGACCTGTATCTCTCGTG_NODE_2_length_329_cov_25.978724	118	.	T	C	77.62	PASS	NS=8:AN=1:DP=207	GT:DP:GQ:EC:SG	0:16:75:0:T	0/1:33:44:11:Y	1:34:99:34:C	0:46:171:0:T	0/1:36:60:17:Y	0:12:63:0:T	1:21:60:21:C	0/1:9:49:6:Y
4191_GGCCGTTTTGAGCGGCTTGCTTTTTGTCCTGGTAG_NODE_2_length_168_cov_7.648809	10	.	G	T	32	PASS	NS=6:AN=1:DP=20	GT:DP:GQ:EC:SG	0:2:33:0:G	0:6:45:0:G	1:5:12:5:T	0:3:36:0:G	0:3:36:0:G	.:0:0:0:.	0:1:30:0:G	.:0:0:0:.
5042_GGCCGTTCCTTGGAAACCCTATGGGGTAGTTCTAC_NODE_2_length_281_cov_10.829182	218	.	C	G	72.88	PASS	NS=8:AN=1:DP=151:AS=TTTTCCATTTCCGGCTGGAGACAAGCTCTTCCTCCTCGATGTTCTTCTTG[C/G]GTTTAGTTTGTTGTTGTAGAAGTGCAGAGCATGTGTTCTGGGCTCAGAAT	GT:DP:GQ:EC:SG	0:9:54:0:C	0:11:60:0:C	0/1:15:36:6:S	0:46:165:0:C	0:27:108:0:C	0/1:8:24:1:C	0:16:46:0:C	0:19:90:0:C
4908_GGCCGCTCCAGGCCCGGGCCCCTGGCCGAGAGGGG_NODE_2_length_170_cov_8.841176	11	.	A	G	29.5	PASS	NS=6:AN=1:DP=25	GT:DP:GQ:EC:SG	0:2:33:0:A	1:2:3:2:G	0/1:9:53:6:R	0/1:4:10:1:A	.:0:0:0:.	.:0:0:0:.	0:7:48:0:A	0:1:30:0:A
178_GGCCGAGAAAGCCTTTCTCTGGTTGCTTTAGTAAC_NODE_2_length_258_cov_21.000000	232	.	C	A,T	61.5	PASS	NS=8:AN=2:DP=116	GT:DP:GQ:EC:SG	0:16:75:0:C	0/2:3:12:1:C	0:16:75:0:C	0/1:23:62:9:M	0:18:81:0:C	0:8:51:0:C	0/1:15:58:10:M	0:17:78:0:C
384_GGCCGGGAGCACAAACTGTTGTGGGCACCCTCTTT_NODE_2_length_301_cov_14.561461	103	.	G	A	86.75	PASS	NS=8:AN=1:DP=295	GT:DP:GQ:EC:SG	0/1:9:21:1:G	0:71:241:0:G	0:55:160:0:G	0:41:90:0:G	0/1:40:35:9:R	0/1:13:43:1:G	0/1:51:88:12:R	0/1:15:16:2:G
650_GGCCGCACCTTTCTCCCGTGGAAGCCGCTCGGCCC_NODE_2_length_329_cov_14.124620	191	.	G	A	33.25	PASS	NS=8:AN=1:DP=143:AS=CACAAATGCTCTACCGGCTTTTAAAGACAGCGGTAAAGAGCCCTGGTGGC[G/A]CAAGAGTTAAAGTGATCTGCTACTAATGGAAAGGTCAGCAGCTGAGCCCA	GT:DP:GQ:EC:SG	0/1:5:13:1:G	0/1:16:11:2:G	0/1:14:76:7:R	0/1:49:57:13:R	0/1:17:25:2:G	0/1:25:42:2:G	0/1:12:33:4:R	0/1:5:9:1:G
9076_GGCCGGACCTTCCTCCCGTGGAAGCTGCTCGGCCC_NODE_2_length_171_cov_9.625731	77	.	C	G	42.62	PASS	NS=8:AN=1:DP=249	GT:DP:GQ:EC:SG	0/1:21:17:18:S	0/1:31:53:14:S	0/1:33:57:16:S	0/1:56:24:46:S	0/1:46:65:28:S	0/1:16:47:8:S	0/1:41:66:24:S	1:5:12:5:G
1827_GGCCGCGTGCGTGGCGTTGGCAGTGAAGGGGTAGG_NODE_2_length_148_cov_9.817568	112	.	G	A	52.12	PASS	NS=8:AN=1:DP=76	GT:DP:GQ:EC:SG	1:4:9:4:A	0:12:63:0:G	0:22:93:0:G	0:8:54:0:G	0:12:63:0:G	0:2:33:0:G	0:15:72:0:G	0:1:30:0:G
5672_GGCCGTAAGCTTATGGTGACAGACAGGTTTGTTGT_NODE_2_length_208_cov_17.591347	121	.	A	C	67.5	PASS	NS=8:AN=1:DP=170:AS=GAATACATGTGTAATGAAAAGTAATTTTCATGTTGTAGTTAGAATCTAAC[A/C]ATTTTGTAATGCGTATAATTTTGCATAGAAATGAAACAATCTGTAATCAT	GT:DP:GQ:EC:SG	0/1:17:13:15:M	1:18:51:18:C	1:21:66:21:C	0:34:129:0:A	0:22:93:0:A	0:19:84:0:A	1:34:99:34:C	0/1:5:5:2:M
5149_GGCCGGCTGGCTGACATCAGCGCCTTAATGTTGTT_NODE_2_length_322_cov_28.562111	22	.	C	T	12	PASS	NS=6:AN=1:DP=30	GT:DP:GQ:EC:SG	.:0:0:0:.	1:2:3:2:T	1:8:21:8:T	1:2:3:2:T	1:3:6:3:T	1:6:15:6:T	1:9:24:9:T	.:0:0:0:.
4297_GGCCGCGGCGCCTCTCAAAGCCGAAAGCCAACCTA_NODE_2_length_246_cov_8.963414	198	.	A	G	77.25	PASS	NS=8:AN=1:DP=166	GT:DP:GQ:EC:SG	0:14:69:0:A	1:6:15:6:G	0/1:22:43:7:R	0:59:185:0:A	0:24:102:0:A	0:10:57:0:A	0:27:108:0:A	0:4:39:0:A
9197_GGCCGGATGTGGCTTCTTCCCGGGCTCCTTTCATT_NODE_2_length_158_cov_12.025316	106	.	A	G	69.75	PASS	NS=8:AN=1:DP=131:AS=TTAAATAAATAAGAATTCAAAGGCAATCTGCCCAAATTTGGTTTTTCAAC[A/G]ATTACTTGTGAAAATGAACATCCGATTCCGTTCGTGTTCCGTTTAAAGTA	GT:DP:GQ:EC:SG	0:11:60:0:A	0:4:39:0:A	0/1:18:72:9:R	0:36:138:0:A	1:11:33:11:G	0:6:45:0:A	0:33:126:0:A	0/1:12:45:9:R
9678_GGCCGAGAAGGTTCCGCGTGGGACTGTAGAGGGAC_NODE_2_length_207_cov_8.661836	66	.	C	G	56.75	PASS	NS=8:AN=1:DP=396	GT:DP:GQ:EC:SG	0/1:29:74:19:S	0/1:83:53:59:S	0/1:95:50:69:S	0/1:68:65:47:S	0/1:38:75:23:S	0/1:21:42:9:S	0/1:55:68:24:S	0/1:7:27:4:S
4325_GGCCGCAGCCTTGCAGGAATCTCTGGAAAATGCCG_NODE_2_length_367_cov_22.948229	52	.	A	T	26.5	PASS	NS=6:AN=1:DP=48:AS=AATAAAAAATATTTTTGAGTGAACGTGGTAAATTTCCTAATTAACTTCGT[A/T]TGCTCTTTCGTTCTACTCAAATATTAATACGAAGTATGAACAAGGATGGG	GT:DP:GQ:EC:SG	.:0:0:0:.	1:9:24:9:T	1:28:84:28:T	0:1:30:0:A	1:3:6:3:T	1:2:3:2:T	1:5:12:5:T	.:0:0:0:.
2831_GGCCGGGCTCGTCCAGCTCCTGGCGCTGCCACACC_NODE_2_length_301_cov_20.222591	66	.	A	G	25	PASS	NS=7:AN=1:DP=59:AS=AGGTGAACTCAATCTGCCTGCAACCTGATCTCCAGACTTTCTGGAGCCAA[A/G]GGGGCTGGATTAATCCTTGAAACTATTACCCTGAGATAATCTTTAAAACT	GT:DP:GQ:EC:SG	.:0:0:0:.	1:20:57:20:G	1:26:75:26:G	1:1:7:1:A	1:4:9:4:G	1:4:9:4:G	1:3:6:3:G	1:1:12:1:A
9502_GGCCGCGCGCTCGGCCCCATGGCCGGAGACAAGGC_NODE_2_length_242_cov_5.342975	31	.	A	G	16.71	PASS	NS=7:AN=1:DP=51	GT:DP:GQ:EC:SG	1:1:0:1:A	1:21:60:21:G	1:12:33:12:G	0/1:9:9:8:R	1:3:6:3:G	.:0:0:0:.	1:4:9:4:G	1:1:0:1:R
4147_GGCCGCAGCCTCTGCGGAGCTGCGCGGGAAGCGGC_NODE_2_length_313_cov_8.188498	57	.	G	A	8.86	q10	NS=7:AN=1:DP=23	GT:DP:GQ:EC:SG	.:0:0:0:.	1:1:6:1:G	1:2:3:2:A	1:3:6:3:A	1:9:24:9:A	1:2:3:2:A	1:5:15:5:A	1:1:5:1:G
9101_GGCCGGGAGAAATCTTAGGAGCTTTGACCTCGACT_NODE_2_length_331_cov_12.205438	273	.	G	C	97	PASS	NS=8:AN=1:DP=243:AS=TTCTAAAAGTCGGGGGTGGGAAATTTCACTCAGAAGGGCAGGGTGAGTGT[G/C]AGTCCTGCCCACAACTTCCGGCAAAAAGAGAGTCGGTTGCTCCGGTGGTC	GT:DP:GQ:EC:SG	0:18:81:0:G	0/1:7:13:6:S	1:41:123:41:C	0:66:212:0:G	0:33:126:0:G	1:21:60:21:C	1:50:125:49:C	0/1:7:36:4:S
341_GGCCGCGGGGGCTGGAATCGCCCCACCGTGGCTGG_NODE_2_length_243_cov_16.818930	13	.	A	T	10.33	PASS	NS=6:AN=1:DP=15	GT:DP:GQ:EC:SG	1:2:3:2:T	1:9:27:9:T	.:0:0:0:.	1:1:4:1:A	.:0:17:0:A	1:1:14:1:A	1:1:4:1:A	1:1:10:1:A
5128_GGCCGTTAGAGAAGGTCGGCAGTTCGGATCCACCT_NODE_2_length_156_cov_28.006411	133	.	G	A	67.5	PASS	NS=8:AN=1:DP=136	GT:DP:GQ:EC:SG	0:16:75:0:G	0:5:42:0:G	0/1:18:11:16:A	0:30:117:0:G	0:27:108:0:G	0:16:75:0:G	0:12:63:0:G	0/1:12:49:6:R
4377_GGCCGAACTCTTAACCATTATTAACCAGAGCTCCT_NODE_2_length_335_cov_20.695522	305	.	A	G	46.86	PASS	NS=7:AN=1:DP=82	GT:DP:GQ:EC:SG	0/1:11:55:8:R	.:0:0:0:.	0:9:54:0:A	0/1:13:20:4:R	0:18:81:0:A	1:2:3:2:G	0/1:11:34:1:A	0:18:81:0:A
5119_GGCCGTGTTGCCACTTACACAAGCCACTTACACAA_NODE_2_length_287_cov_19.452961	60	.	C	G	68	PASS	NS=8:AN=1:DP=175:AS=TGACAATTATGTTTCCCACACACAGAGACGTGTCTTTAGCAAGCGCAGTG[C/G]GGTACCGCACTATCATTCTTTGGGGTGCCTGAGCGGGGTATTGATCAAAA	GT:DP:GQ:EC:SG	0:8:51:0:C	0/1:27:58:12:S	0/1:52:58:20:S	0/1:24:68:17:S	0:19:87:0:C	0:5:42:0:C	0:39:150:0:C	0:1:30:0:C
3596_GGCCGTTAAGCACTGCGCGTGCGTAGTGAGCACCC_NODE_2_length_309_cov_16.870550	95	.	A	G	42	PASS	NS=8:AN=1:DP=105:AS=CCTTGTTTTTGCCTTGCTGCACTCACAATGACAAATTCCAAGTTTATTTC[A/G]TTTTACTTGGGTGTGGGAGATTAAAAAGGGATTAAAATCCTAAACTAGAA	GT:DP:GQ:EC:SG	0/1:8:31:3:R	0/1:19:61:7:R	1:10:27:10:G	0/1:27:76:20:R	0:18:84:0:A	1:2:3:2:G	1:14:39:14:G	0/1:7:15:1:A
161_GGCCGAAGGGGGTCCCACTTCCGACTCAGGTCGGC_NODE_2_length_221_cov_6.760181	114	.	G	C	71.88	PASS	NS=8:AN=1:DP=207:AS=AACTGAAAATTCAACAAACGATAACTTATTATCTACAAAGACTACTCAAA[G/C]AAGCATAAGACTGGCGGGGAAAATAGAAAGCAGGGGACCACTAACGCGGC	GT:DP:GQ:EC:SG	1:13:36:13:C	1:14:39:14:C	1:62:155:62:C	0:44:159:0:G	0/1:34:40:8:S	0/1:12:59:5:S	0/1:21:82:9:S	0/1:7:5:2:S
3672_GGCCGCTCAGCCCGGCTTCCCCACAGGTAGGCTGT_NODE_2_length_282_cov_7.652482	151	.	G	A	119.62	PASS	NS=8:AN=1:DP=292	GT:DP:GQ:EC:SG	0:26:108:0:G	0:15:72:0:G	0:48:154:0:G	0:78:215:0:G	0/1:39:70:15:R	0/1:18:79:10:R	0:55:193:0:G	0:13:66:0:G
7330_GGCCGTGCAGGCTCTCTGCACTCCCTCTGCGAGGC_NODE_2_length_166_cov_8.777108	21	.	G	C	16	PASS	NS=8:AN=1:DP=47	GT:DP:GQ:EC:SG	1:1:1:1:G	1:4:9:4:C	1:11:30:11:C	1:7:24:7:C	1:13:36:13:C	1:1:4:1:G	1:7:18:7:C	1:3:6:3:C
5020_GGCCGCGCTGCGTCCCCTCGCCTCATCGGGCCTCG_NODE_2_length_201_cov_12.059702	46	.	A	C	16	PASS	NS=6:AN=1:DP=38	GT:DP:GQ:EC:SG	1:5:12:5:C	1:14:39:14:C	1:5:12:5:C	1:11:30:11:C	1:1:0:1:A	.:0:0:0:.	1:2:3:2:C	.:0:0:0:.
3298_GGCCGGTGGGTTGAACCGCCAACCTTTTCGATTAG_NODE_2_length_170_cov_15.270588	154	.	T	C	34.5	PASS	NS=8:AN=1:DP=101	GT:DP:GQ:EC:SG	1:4:9:4:C	0/1:27:61:12:Y	0/1:25:71:12:Y	0/1:15:23:2:T	1:8:21:8:C	1:1:4:1:T	0:15:72:0:T	1:6:15:6:C
8074_GGCCGGAGGATTCGAACTACTGACTTTATGGTTAG_NODE_2_length_316_cov_6.193038	314	.	C	T	26.43	PASS	NS=7:AN=1:DP=31	GT:DP:GQ:EC:SG	1:4:9:4:T	.:0:0:0:.	1:8:21:8:T	0/1:8:35:1:C	0/1:5:21:1:C	0:1:30:0:C	0:1:30:0:C	0:4:39:0:C
5490_GGCCGCAAAGAGTGGGGTCTTCCTCCCGGAGTTGA_NODE_2_length_189_cov_6.333333	161	.	A	G	33	PASS	NS=8:AN=1:DP=95	GT:DP:GQ:EC:SG	1:12:33:12:G	1:3:6:3:G	1:39:114:39:G	1:19:54:19:G	1:7:18:7:G	1:2:3:2:G	1:9:27:9:G	1:4:9:4:G
4776_GGCCGTCTGGATCTCCCTGGACGTGATGGTCGAGC_NODE_1_length_203_cov_3.359606	161	.	G	A	72.12	PASS	NS=8:AN=1:DP=142	GT:DP:GQ:EC:SG	0:22:96:0:G	0:15:72:0:G	0:18:81:0:G	0:8:51:0:G	0/1:22:56:9:R	0:8:51:0:G	1:45:131:45:A	0:4:39:0:G
5918_GGCCGGGCCAGGTCTCTCTGCTTTAGGGAAAGAGC_NODE_2_length_287_cov_5.282230	124	.	C	T	44.75	PASS	NS=8:AN=1:DP=70	GT:DP:GQ:EC:SG	0:3:36:0:C	0/1:14:46:5:Y	0/1:9:6:2:C	0:9:54:0:C	0:13:66:0:C	0:4:39:0:C	0:13:69:0:C	0:5:42:0:C
4377_GGCCGAACTCTTAACCATTATTAACCAGAGCTCCT_NODE_2_length_335_cov_20.695522	118	.	A	G	58.75	PASS	NS=8:AN=1:DP=164:AS=GCTACCAGAGGATATCAGCTCCAGGTGTTTCTAAATATAAGAGCGGGTGT[A/G]GGGGGTGTCCCTCAATTTTATAAACACAGCAAGCAAGGTAAGGCTTCCTA	GT:DP:GQ:EC:SG	0/1:10:32:8:R	0:38:141:0:A	0/1:19:63:13:R	0/1:34:46:16:R	0:27:111:0:A	0/1:10:2:3:R	0/1:17:21:6:R	0:9:54:0:A
3231_GGCCGAGGCCTGGGTCTCGGGCAGCCACGCGCCCC_NODE_2_length_266_cov_5.721805	197	.	C	T	116.62	PASS	NS=8:AN=1:DP=286:AS=CGGGCGGAAGCATATGAAACCAGGTGCCTCCACGAGCTGCGCTCTCGCCC[C/T]CACCCCCAAGCCTGACACCAGACGCTGGACCCGCAAGGAGGGAATGCTTA	GT:DP:GQ:EC:SG	0:31:123:0:C	0/1:24:42:10:Y	1:31:90:31:T	0:73:209:0:C	0:55:196:0:C	0:13:66:0:C	0:47:144:0:C	0:12:63:0:C
8730_GGCCGCGAGAGCCAATCCGCTCGCACAGGAGGCCC_NODE_2_length_173_cov_8.502891	121	.	G	T	84.62	PASS	NS=8:AN=1:DP=678	GT:DP:GQ:EC:SG	0/1:198:177:25:G	0:10:57:0:G	0:19:84:0:G	0/1:67:44:19:K	0/1:63:44:18:K	0/1:28:20:4:G	0/1:42:12:8:K	0/1:251:239:19:G
8685_GGCCGGGTGGTGGCGGTGGGGATACCGAAGCGCTT_NODE_3_length_188_cov_3.632979	185	.	A	C	8.67	q10	NS=6:AN=1:DP=20	GT:DP:GQ:EC:SG	.:0:0:0:N	1:2:3:2:C	1:13:36:13:C	1:1:1:1:A	1:1:0:1:M	.:0:0:0:N	1:2:3:2:C	1:1:9:1:A
4558_GGCCGGACGTCAGTTCCGGGAGTGTAGACACCAAG_NODE_2_length_225_cov_10.120000	122	.	C	T	127.38	PASS	NS=8:AN=1:DP=426:AS=TCAGAACTCTTCAGACTGTAGCGCCTTTCAATGGTGGTGATGACACTGCT[C/T]AGGTACCCGGAGACCATTAAGGCCTGAATGAAGGTCAGGACGCACATGCA	GT:DP:GQ:EC:SG	0/1:15:52:6:Y	0:27:108:0:C	0/1:83:54:62:Y	0:91:220:0:C	0:70:208:0:C	0/1:35:77:21:Y	0:86:216:0:C	0:19:84:0:C
5382_GGCCGGATTCGTCCTCAGCCCCTCTGCTCTCGGGC_NODE_2_length_224_cov_4.750000	188	.	G	A	43.25	PASS	NS=8:AN=1:DP=107	GT:DP:GQ:EC:SG	1:4:9:4:A	1:1:4:1:G	0/1:28:92:14:R	0/1:28:22:5:R	1:11:30:11:A	0:5:45:0:G	0:23:96:0:G	0:7:48:0:G
10406_GGCCGCTGCTTCTGCCTCACTTGTCCTCCTCTCCC_NODE_2_length_304_cov_18.398026	201	.	A	G	84.62	PASS	NS=8:AN=1:DP=400:AS=CAGAATGCAATGTAAGGGATTTGCCTGGAATCTTCATTCTGTTAAAGGCT[A/G]AAGAAAATTAACTGCCCATAGTTAAACAGTGTGAACTTAGGGGGGAGACC	GT:DP:GQ:EC:SG	1:16:45:16:G	0/1:38:75:19:R	0/1:31:0:6:A	0:87:229:0:A	0/1:81:70:55:R	1:51:109:51:G	0/1:75:73:38:R	0/1:21:76:14:R
3485_GGCCGAGTGCCATGGGCAGAAAACATTGACACATA_NODE_6_length_160_cov_18.825001	138	.	C	T	41.25	PASS	NS=8:AN=1:DP=305	GT:DP:GQ:EC:SG	0/1:25:30:8:Y	0/1:63:44:20:Y	0/1:76:12:20:Y	0/1:33:67:18:Y	0/1:30:72:16:Y	0/1:16:40:6:Y	0/1:53:53:18:Y	0/1:9:12:3:Y
10163_GGCCGGTTGGTTCTTCCAATTCCATTGTCCAAGCC_NODE_2_length_314_cov_9.633758	42	.	A	T	26.14	PASS	NS=7:AN=1:DP=68	GT:DP:GQ:EC:SG	1:1:0:1:W	1:19:54:19:T	1:20:57:20:T	1:12:33:12:T	1:4:9:4:T	1:4:9:4:T	1:8:21:8:T	.:0:0:0:.
6830_GGCCGCCGCTTGCCGCCACAGGCCGGGGCCCCAGA_NODE_2_length_182_cov_6.252747	174	.	C	A	8	q10	NS=6:AN=1:DP=24	GT:DP:GQ:EC:SG	.:0:0:0:N	.:0:0:0:.	1:1:12:1:C	0/1:9:6:8:A	1:6:15:6:A	1:2:3:2:A	1:3:6:3:A	1:3:6:3:A
9470_GGCCGGTGAGAACGAGAGGAGCAGGGAGGGCAGCG_NODE_2_length_290_cov_14.889655	59	.	G	C	45.25	PASS	NS=8:AN=1:DP=117:AS=TGCTGCATCTGCAACCGCAGTTTCCCCACCTTCATCCCCACCCATCCTTC[G/C]ATACGCTCAGGCCAAAACACTTGACGCCGGTGTTTCTCTCACACACCACA	GT:DP:GQ:EC:SG	0:6:45:0:G	0/1:27:38:7:S	0:37:83:0:G	0/1:10:1:2:G	0:16:78:0:G	0/1:8:24:3:S	0:10:57:0:G	0:3:36:0:G
9859_GGCCGCTCTTTTTCCTGCAGTGTCAGCTAATTCAT_NODE_1_length_374_cov_54.858288	122	.	A	G	50.88	PASS	NS=8:AN=1:DP=256:AS=GAAGGAGTACCACACGACTACTTTGATTTGACAGATCACCTTCTGATCCC[A/G]AGAGGAGATATCCAAGAAACTCCTTTAGCTAACCTTTCTGCAGTTTAATT	GT:DP:GQ:EC:SG	0/1:6:45:4:R	0/1:65:89:34:R	0/1:37:44:10:R	0/1:47:79:19:R	0/1:34:51:10:R	0/1:15:16:13:R	0/1:39:78:16:R	0/1:13:5:3:R
3292_GGCCGAGATAAGCCAACAGCCTTGTCTCAGAAGTT_NODE_2_length_338_cov_26.553255	102	.	C	T	71.38	PASS	NS=8:AN=1:DP=160:AS=AAAATTCAATGATTCTGCTTTGTTTTATAAGGAAAATGTAAGGAGCAAGG[C/T]GGAGAAACCCCACTTGACGTTCTCTCTGTATAGCGACATCTGCTGGGCTG	GT:DP:GQ:EC:SG	0:2:33:0:C	0:36:135:0:C	0/1:38:59:14:Y	0/1:22:50:10:Y	0:19:84:0:C	0:8:51:0:C	0:28:111:0:C	0:7:48:0:C
8901_GGCCGTGTACCTCTGTGCCAGCAGCTTAGCCACAG_NODE_2_length_287_cov_14.278746	226	.	G	A	77.12	PASS	NS=8:AN=1:DP=213	GT:DP:GQ:EC:SG	0:8:51:0:G	0:9:54:0:G	0/1:38:22:10:R	0:61:207:0:G	0:27:108:0:G	0:29:114:0:G	0/1:26:15:24:A	0:15:46:0:G
8486_GGCCGAGGAGAACTGTGCCAGGGATTGAATCCCCC_NODE_2_length_189_cov_14.962963	25	.	C	G	8.29	q10	NS=7:AN=1:DP=21	GT:DP:GQ:EC:SG	.:0:0:0:.	1:3:9:3:G	1:5:12:5:G	1:1:0:1:C	1:7:18:7:G	1:1:12:1:C	1:3:6:3:G	1:1:1:1:C
557_GGCCGCCCTGGGCGCGCCAGCTTCGGACTGGCCGG_NODE_2_length_262_cov_5.400764	199	.	A	T	26.71	PASS	NS=7:AN=1:DP=99	GT:DP:GQ:EC:SG	.:0:0:0:N	1:1:11:1:A	1:1:3:1:A	0/1:34:61:21:W	0/1:23:17:7:W	0:6:45:0:A	0/1:25:26:8:W	1:9:24:9:T
10067_GGCCGAGGGGGAGGGAAGCCGCGGGTGTCCTCACG_NODE_2_length_263_cov_7.714829	240	.	C	A	26.17	PASS	NS=6:AN=1:DP=52	GT:DP:GQ:EC:SG	0/1:25:61:17:M	.:0:0:0:.	.:0:0:0:.	0/1:4:13:3:M	0/1:6:26:4:M	0/1:4:19:1:C	1:1:2:1:C	1:12:36:12:A
6303_GGCCGTCCCGGAGCCTGCGCGTCGGGTACCCTTCA_NODE_2_length_222_cov_5.166667	194	.	T	C	33.75	PASS	NS=8:AN=1:DP=76	GT:DP:GQ:EC:SG	1:11:30:11:C	1:10:27:10:C	1:13:36:13:C	0/1:17:42:7:Y	1:10:33:10:C	0:2:33:0:T	0/1:11:36:7:Y	0:2:33:0:T
1493_GGCCGACATCCCGGAGTAAGAGAAAAGCTCTGCCT_NODE_2_length_198_cov_18.873737	42	.	A	C	21.38	PASS	NS=8:AN=1:DP=61	GT:DP:GQ:EC:SG	1:2:3:2:C	1:13:36:13:C	1:25:72:25:C	1:6:18:6:C	1:1:6:1:A	1:5:12:5:C	1:7:18:7:C	1:2:6:2:C
1455_GGCCGTTTCGAATCCACCAGGCGCTCCTTGGAAAC_NODE_2_length_373_cov_19.305630	285	.	G	C	80.12	PASS	NS=8:AN=1:DP=238:AS=ATCGGGGTCTATTGGTACATAAGTGTAACAAACGCAGATTTTCAAAATTT[G/C]TATTTTTCCTACCAAAATTTCAGACACCTCATACAATAATACCCTGTAAA	GT:DP:GQ:EC:SG	0:33:126:0:G	0:3:36:0:G	0/1:24:95:16:S	0/1:55:90:21:S	0:43:156:0:G	0:16:75:0:G	0/1:45:58:13:S	0/1:19:5:3:S
10616_GGCCGGGCATCCAAGAATATTATAGTGTCCGTCTC_NODE_2_length_284_cov_23.739437	20	.	T	C	49.5	PASS	NS=6:AN=1:DP=52	GT:DP:GQ:EC:SG	.:0:0:0:.	0:20:87:0:T	0:14:69:0:T	0:9:54:0:T	0:2:33:0:T	.:0:0:0:.	0/1:5:21:4:Y	0:2:33:0:T
2620_GGCCGAGAGAAGTGCAGGGAATAAAAGAGTAAGAG_NODE_2_length_202_cov_9.128713	132	.	T	C	74.5	PASS	NS=8:AN=1:DP=150:AS=TGGCAGGCCTGGCTCTGTGACCTTGGCCATGTCACTTCACCTTGCTGAGC[T/C]TCATTTCCTGACCTGTAAAAGGAAGCTGAAAGGGCTTCTCTTCAGGTTAC	GT:DP:GQ:EC:SG	0:24:99:0:T	0:5:42:0:T	0:4:39:0:T	0/1:29:59:12:Y	0:24:99:0:T	0/1:19:69:11:Y	0:25:102:0:T	0:20:87:0:T
6644_GGCCGCCACCCTGGCTCCCACCCTCACACAGAGTG_NODE_2_length_291_cov_9.718213	209	.	A	G	91.38	PASS	NS=8:AN=1:DP=190	GT:DP:GQ:EC:SG	0/1:9:20:2:A	0:3:36:0:A	0:32:123:0:A	0:57:202:0:A	0/1:19:56:7:R	0:13:66:0:A	0:48:171:0:A	0:9:57:0:A
5059_GGCCGGTAACACTAACTACTGCAGGTTGAGCGCTT_NODE_2_length_269_cov_22.650558	167	.	A	G	130.38	PASS	NS=8:AN=1:DP=494:AS=AGGACTTTAACAGGCAGTGGGGATCTTGGTTCGATTTACTTTTAAAAAAT[A/G]TTACGTTCCCTCCAGCTGTGCGGAGAACGGCCTGAAGGGAAACAAAAGTC	GT:DP:GQ:EC:SG	0/1:24:102:13:R	0/1:56:98:23:R	0:67:218:0:A	0:114:253:0:A	0/1:77:5:14:R	1:27:81:27:G	1:90:172:90:G	1:39:114:39:G
10904_GGCCGGTGCAGGCTCCGCGTGCTGGGAGGGGGCGA_NODE_2_length_340_cov_7.914706	307	.	C	G	55.88	PASS	NS=8:AN=1:DP=93	GT:DP:GQ:EC:SG	0:12:63:0:C	0:4:39:0:C	0:4:39:0:C	0:28:111:0:C	0:10:60:0:C	0/1:3:12:1:C	0:10:57:0:C	1:22:66:22:G
3996_GGCCGAACATAGCTGGCCCTAGCTTCTCGAAGGTA_NODE_2_length_314_cov_21.812101	26	.	G	T	17.33	PASS	NS=6:AN=1:DP=39	GT:DP:GQ:EC:SG	.:0:0:0:.	1:9:24:9:T	1:9:24:9:T	1:10:27:10:T	1:4:9:4:T	.:0:0:0:.	1:6:15:6:T	1:1:5:1:G
2084_GGCCGGAAAAGCAGGCAGAGGCTGTTGGTAATCTG_NODE_2_length_253_cov_19.909090	97	.	C	T	84.25	PASS	NS=8:AN=1:DP=419:AS=AGGTGGATCCTAAACCTACCCACTTCTGAGTTACAAAAAGACCAGAATAA[C/T]CACAGAGGCACACACAGGGAGAAGACAGATGTCAGGCAAGGACTTGTCTA	GT:DP:GQ:EC:SG	1:15:42:15:T	0/1:59:94:29:Y	0/1:73:62:25:Y	0/1:75:90:36:Y	0/1:58:93:33:Y	1:26:81:26:T	1:91:146:91:T	1:22:66:22:T
3805_GGCCGAGGTCGGGACGGCCAGGTAGGTGGGATCGC_NODE_3_length_162_cov_4.141975	86	.	A	G	45.38	PASS	NS=8:AN=1:DP=136:AS=ACAATGTAACAAAAATCAAATCCTCTGCCATCAGTCAATCTCAACTAATA[A/G]AAAAAAAATAGCGACCGTATAATACAGGGTAGAGCTAGCTGCCCCATAAG	GT:DP:GQ:EC:SG	0:6:45:0:A	1:22:63:22:G	0/1:44:18:14:R	0:15:72:0:A	1:22:63:22:G	1:4:9:4:G	0:19:84:0:A	1:4:9:4:G
9993_GGCCGCCCCCGCACCCAGCAGGAGGAAAACAAAGC_NODE_2_length_248_cov_6.834677	11	.	C	T	25.43	PASS	NS=7:AN=1:DP=35	GT:DP:GQ:EC:SG	1:2:3:2:T	1:11:30:11:T	0:1:30:0:C	0:5:42:0:C	1:1:4:1:C	0:8:51:0:C	1:7:18:7:T	.:0:0:0:.
9408_GGCCGCTGAGGACTCTCTTTGTCCCCCGAGGCTGT_NODE_2_length_151_cov_22.337748	96	.	A	T	52.88	PASS	NS=8:AN=1:DP=291:AS=GATTCGGCTGCCCAGCTCTAGAGTCACCAAGAGTCCCTCCTTACCATTCT[A/T]CTCACGGGGACGGTCCTCCATGGCGCCACTCGCCTGAGAAACCAAGGGCC	GT:DP:GQ:EC:SG	0/1:19:30:5:W	0/1:9:18:3:W	0/1:72:88:37:W	0/1:120:30:37:W	0/1:20:55:9:W	0:6:45:0:A	0/1:21:82:12:W	0/1:24:75:11:W
1367_GGCCGGCTGGGGCCCTCGCAGGGTGGCTGGTTACA_NODE_2_length_212_cov_7.367925	36	.	T	G	35.25	PASS	NS=8:AN=1:DP=108	GT:DP:GQ:EC:SG	0:3:36:0:T	1:3:6:3:G	0/1:21:46:7:K	0/1:28:23:7:K	0/1:14:3:3:K	1:4:9:4:G	0:33:126:0:T	0:2:33:0:T
6415_GGCCGCTCCCACCCTGCACCCCACTGCCTTTAAAA_NODE_2_length_298_cov_11.691276	60	.	G	A	33.25	PASS	NS=8:AN=1:DP=81:AS=TCTTTCACTCCCGAGCCGCTAAGATGCGGTGTAAAGGCTCACGAACCCAG[G/A]ACTTCATGCGCAGCCTGCTTGTTTTCTCCCTGTCCAGAGTGAGAGAGGGG	GT:DP:GQ:EC:SG	0:1:30:0:G	0/1:30:70:17:R	0/1:24:74:16:R	0/1:8:19:3:R	0/1:5:29:3:R	1:1:3:1:G	0/1:10:33:5:R	0/1:2:8:1:G
1520_GGCCGAGGAGGGAACACTGGGTATCTTTTTAGGGG_NODE_2_length_297_cov_5.703704	235	.	T	C	80.38	PASS	NS=8:AN=1:DP=243:AS=ATGACAGGAGCTTCCTGCCCATGCCCCGAGCCACCAGGAGGGCCACCCCA[T/C]CCTGCAAGGTGAGGGTGGAGTGTGCCTGCCGTGTGTGAGGATGTCTGTCC	GT:DP:GQ:EC:SG	1:19:54:19:C	0/1:14:3:12:Y	1:45:107:45:C	0:69:204:0:T	1:33:96:33:C	0/1:27:77:17:Y	1:31:90:31:C	1:5:12:5:C
8224_GGCCGTGCGCCTGCTGCTGCCCGGGGAGCTGGCCA_NODE_2_length_171_cov_23.397661	126	.	A	G	71.12	PASS	NS=8:AN=1:DP=141:AS=TGAAAATACGAGTTTAATAAAGTTAAAACAGCTTTTTCGGAGGGAGCTAG[A/G]GCAGCAGAAAAAATTTGTCAGTTTAACTTGGTCTTTAAGTACCTCAGCTT	GT:DP:GQ:EC:SG	0:16:75:0:A	0:1:30:0:A	0:9:54:0:A	0:38:141:0:A	0/1:23:50:9:R	0:14:69:0:A	1:17:51:17:G	0:23:99:0:A
3839_GGCCGTGCCAGCTCATTGGCTGACGTGGGCGACGG_NODE_2_length_270_cov_7.233333	197	.	A	G	82.12	PASS	NS=8:AN=1:DP=279:AS=TAAGGACTGCGGAGAAGAAAGTGCCCTGTTTAAGGTCAACACTCCTCTAA[A/G]GGAGGTCTCAGGTGGGCGGAGGTTTGCACACCCTACAGCAGTAGGCAGCG	GT:DP:GQ:EC:SG	0/1:19:42:10:R	0/1:38:39:15:R	0:50:187:0:A	0:57:199:0:A	0/1:34:51:24:R	0/1:26:61:17:R	0/1:41:39:15:R	1:14:39:14:G
9198_GGCCGACATCCTTTCTTTCATCCACACAGCGGTCT_NODE_2_length_242_cov_6.239669	96	.	G	A	52.62	PASS	NS=8:AN=1:DP=185	GT:DP:GQ:EC:SG	0:14:69:0:G	0/1:52:60:7:G	0/1:28:56:8:R	0:38:82:0:G	0/1:16:17:3:G	0/1:14:14:2:G	0:7:48:0:G	0:16:75:0:G
9841_GGCCGCCCCTTGCCCTCCGCGGCTCCTCCTCCGCC_NODE_2_length_301_cov_11.877076	225	.	C	A	114	PASS	NS=8:AN=1:DP=274:AS=TACAGTTCAGTGGCTTTTAGTATATTCACAAGGTTGTGCAACCATGACCG[C/A]TATCTAATTCCAGAACATTTTTGTCACCCCTAAAAGGAACCTCCACCGAT	GT:DP:GQ:EC:SG	0:10:57:0:C	0:36:135:0:C	0:51:181:0:C	0/1:53:70:21:M	0:52:193:0:C	1:15:45:15:A	0:46:171:0:C	0:11:60:0:C
5822_GGCCGTGTTCAGCTCTATTCAACTCTTTTCTACTT_NODE_2_length_230_cov_13.886956	123	.	T	C	39	PASS	NS=8:AN=1:DP=233:AS=CTCAATAGAACAGCTTAGAGTAGTGTAGGTTAGGCTGGGATTCAATAGGG[T/C]AGGGCACAGAGGAATAGACTAGAGAAGCATAGAGTAGAAGAGAAGAGAAT	GT:DP:GQ:EC:SG	0/1:19:68:7:Y	0/1:37:31:4:T	0/1:25:36:3:T	0/1:35:29:4:T	0/1:23:5:4:T	0:20:87:0:T	0/1:65:10:12:Y	0/1:9:46:4:Y
9198_GGCCGACATCCTTTCTTTCATCCACACAGCGGTCT_NODE_2_length_242_cov_6.239669	78	.	G	T	57.38	PASS	NS=8:AN=1:DP=159	GT:DP:GQ:EC:SG	0/1:13:26:4:K	0:46:135:0:G	0/1:20:36:2:G	0:36:114:0:G	0/1:7:2:2:K	0/1:12:42:1:G	0:11:60:0:G	0:14:44:0:G
9514_GGCCGCAGGCAACAATTCAGGAAAGGTTTTCCCAT_NODE_2_length_272_cov_8.577206	193	.	A	G	93.88	PASS	NS=8:AN=1:DP=186:AS=AATGGCTTAAAACCTGGGCCTTAGTTATTCCTTGTCTATGAAGTGGGGAT[A/G]AATATTACCAACCTCAAGGCTTGGGCAGGCAAAATGAGACTACGGATGCG	GT:DP:GQ:EC:SG	0:7:48:0:A	0/1:16:67:9:R	0:32:123:0:A	0:38:141:0:A	0:38:141:0:A	0:12:63:0:A	0:32:126:0:A	0/1:11:42:5:R
6760_GGCCGCCTCCGCGGAGGGGCCCCAAGCGTCCCACA_NODE_2_length_243_cov_7.106996	88	.	G	C	65.5	PASS	NS=8:AN=1:DP=182:AS=ACGATATCCTCATTCGCATGCGCGACCCCCGGAACGTCACAGAGGCTCCA[G/C]TAGGTAATGGCTCTGGCCCCCGGGGAGCCGCAGGTCTGCTGCTGGGAGGC	GT:DP:GQ:EC:SG	1:19:54:19:C	1:38:114:38:C	1:46:131:46:C	1:33:99:33:C	1:22:63:22:C	1:3:6:3:C	1:15:42:15:C	1:6:15:6:C
4164_GGCCGAAACTCCCCGCTCAATACCTGGCGCGCTCC_NODE_2_length_285_cov_19.347368	36	.	C	T	49.86	PASS	NS=7:AN=1:DP=67	GT:DP:GQ:EC:SG	0:4:39:0:C	0:14:69:0:C	0/1:14:56:7:Y	0:15:72:0:C	0:10:57:0:C	0/1:2:5:1:Y	0:8:51:0:C	.:0:0:0:.
6145_GGCCGGCCTTGTTCTACCGTTTGGCCCTCCTGGAG_NODE_2_length_255_cov_24.129412	71	.	A	G	64.88	PASS	NS=8:AN=1:DP=180:AS=GGTGATGTCCCAGTACGTTAGTAACAGAAGGAGGTGGGGCCACGAGTCCA[A/G]CGCTGGCCTTGACTGAGTCTCCAAACTCAACGCTCACCCTCAGCGGAAAA	GT:DP:GQ:EC:SG	0/1:16:73:10:R	1:33:96:33:G	0/1:30:82:21:R	0/1:38:22:9:R	0:28:114:0:A	0/1:10:30:4:R	0:20:87:0:A	1:5:15:5:G
10259_GGCCGGTCCCACCACCGGCCCTTCGGAGGCAGCCT_NODE_2_length_140_cov_18.228571	22	.	C	T	42	PASS	NS=8:AN=1:DP=85	GT:DP:GQ:EC:SG	0/1:7:4:6:Y	0/1:4:19:3:Y	0:26:105:0:C	0:16:75:0:C	1:12:33:12:T	0:5:42:0:C	0/1:14:28:5:Y	0:1:30:0:C
1263_GGCCGTGTACCTCTGTGCCAGTAGCTTAGCCACAG_NODE_2_length_296_cov_17.766891	33	.	A	G	40.12	PASS	NS=8:AN=1:DP=105	GT:DP:GQ:EC:SG	0:2:33:0:A	0:41:63:0:A	0:29:53:0:A	0/1:14:38:4:R	0/1:7:17:1:A	0:2:33:0:A	0:9:54:0:A	0:1:30:0:A
785_GGCCGTGACGGACTCGTAGGCATCCTCGAAGTGTT_NODE_2_length_277_cov_10.530686	178	.	G	C	140.12	PASS	NS=8:AN=1:DP=367	GT:DP:GQ:EC:SG	0/1:26:24:9:S	0:39:144:0:G	0:52:184:0:G	0:79:226:0:G	0:71:215:0:G	0:25:105:0:G	0:50:181:0:G	0/1:25:42:3:G
6639_GGCCGTTTCCCCCGGAGAACTGCCTCGCGGTAGCC_NODE_2_length_144_cov_62.055557	61	.	T	C	35.75	PASS	NS=8:AN=1:DP=172:AS=CAAATGAGGAATTCGTTGCAGGAAAGAGGACGGAAAGAAAGTTTCTCTCC[T/C]TCTGCCTGCTTTGCTCAGAGGACTGGATGAAGTCAGGGAGTTCTCCCTTT	GT:DP:GQ:EC:SG	0/1:16:27:6:Y	0:2:33:0:T	0:2:33:0:T	0/1:65:61:9:T	0/1:41:37:17:Y	0/1:11:29:5:Y	0/1:10:32:1:T	0/1:25:34:3:T
7979_GGCCGCTCGGGCCGCGACAGTCGCGCCATCACCAC_NODE_2_length_276_cov_8.844203	171	.	A	C	102.38	PASS	NS=8:AN=1:DP=426:AS=GACCCGAAACACCTCCAACTTCACCCCCATCTTGCTTCTCCAGTCTCCAA[A/C]GCCCCTTCCGCCCAAAGCAGACCCTCCAGCAATACAGCAGCTCATTGGTG	GT:DP:GQ:EC:SG	0:39:117:0:A	0/1:58:79:36:M	0/1:67:57:26:M	0:92:219:0:A	0/1:54:33:15:M	0:21:90:0:A	0:70:204:0:A	0/1:25:20:6:M
5100_GGCCGACCATCAGCATGGAGCATATCAGTGCCTTC_NODE_2_length_325_cov_23.843077	21	.	C	G	5	q10	NS=7:AN=1:DP=15	GT:DP:GQ:EC:SG	1:1:4:1:C	1:3:6:3:G	1:3:6:3:G	0/1:2:6:1:C	1:2:3:2:G	1:3:6:3:G	1:1:4:1:C	.:0:0:0:.
4271_GGCCGAACCCTGGAGAGGAAGGAGCTATGCAGAGA_NODE_2_length_194_cov_3.958763	127	.	G	C	22.88	PASS	NS=8:AN=1:DP=25	GT:DP:GQ:EC:SG	0:3:36:0:G	1:3:6:3:C	0:2:33:0:G	0/1:8:4:2:S	0:3:36:0:G	0/1:2:2:1:G	0:3:36:0:G	0:1:30:0:G
3873_GGCCGCGCCGGAGCCTGGGGGCGGGGAGCGCGGGG_NODE_2_length_287_cov_10.222997	151	.	C	T	52.5	PASS	NS=8:AN=1:DP=162:AS=GAGAACAGACACCCCCTCCAAAGAATAAACTGTATCAGCAACATCATCAG[C/T]CGCATATGCCACGACTGTCCCTGACAGATCTAAATCGCAGACCACCAAAA	GT:DP:GQ:EC:SG	0/1:6:30:3:Y	0/1:4:3:2:Y	1:5:12:5:T	0:31:123:0:C	0/1:42:73:23:Y	1:15:42:15:T	0/1:44:65:18:Y	0:15:72:0:C
9731_GGCCGTCCGCGGTCTTGGGTCTCATTCCAGCCCCT_NODE_2_length_165_cov_13.666667	73	.	A	G	77	PASS	NS=8:AN=1:DP=197	GT:DP:GQ:EC:SG	0/1:13:1:3:R	1:4:12:4:G	0:43:127:0:A	0:29:114:0:A	0:33:106:0:A	0:14:39:0:A	0:52:163:0:A	0:9:54:0:A
7419_GGCCGGGTGTTTGCATAGAACGTTATCCGCTGAAT_NODE_2_length_176_cov_9.522727	23	.	T	C,G	65.25	PASS	NS=8:AN=2:DP=453	GT:DP:GQ:EC:SG	0/1/2:20:6:3,2:T	0/1:155:93:28:T	0:74:144:0:T	0/1:54:3:10:T	0:55:99:0:T	0:16:75:0:T	0/1:69:81:6:T	0/1:10:21:3:Y
9881_GGCCGCAGAGGGAACCACACAGCTGTGCCCTGCCT_NODE_2_length_292_cov_4.013699	248	.	T	C	48.12	PASS	NS=8:AN=1:DP=96:AS=GATGCCCAGGGTGCCGACCGGGAGCCCCTTCCCAGAATAATCAGCAGCCT[T/C]AGTAGACAAATCCCTGTGATGGCAGCAAGAGCAGCCCAGAGCCACATTCC	GT:DP:GQ:EC:SG	0/1:23:71:10:Y	0:3:36:0:T	1:13:36:13:C	0/1:16:38:6:Y	0:12:66:0:T	0:7:48:0:T	1:14:39:14:C	0:8:51:0:T
10521_GGCCGCCTGTACCTTGCGCCCGGTGACCTAGCTTT_NODE_2_length_225_cov_6.493333	106	.	G	T	39.75	PASS	NS=8:AN=1:DP=103:AS=AGGATAGCGTAGAACTGCTCCATAAAGTTTCCACGAAGCGGCTGGTGGAG[G/T]CAAACTGCCGGCCTCTGGTTAGCAGCCCAACGCTTACCACTGCGCCACCA	GT:DP:GQ:EC:SG	1:7:27:7:T	1:11:33:11:T	1:26:87:26:T	1:8:21:8:T	1:34:89:34:T	1:4:12:4:T	1:12:36:12:T	1:1:13:1:G
10185_GGCCGTCCAGCAGCAATCGCCTTCATGAACAAAGG_NODE_2_length_235_cov_10.765958	88	.	C	T	58.12	PASS	NS=8:AN=1:DP=92:AS=ACATTAGACAAATTAAATATTAAGGGCATTAATGACACGTTATTACCTTA[C/T]AGGATACCAGTATATGAAAAGATGAAAAGCATCAGGTTTGCTTCTTGTAA	GT:DP:GQ:EC:SG	0:2:33:0:C	0/1:16:78:11:Y	0:8:51:0:C	0:20:87:0:C	0:14:69:0:C	1:3:6:3:T	0:28:111:0:C	0:1:30:0:C
1090_GGCCGCCATCTGGGTGCCGGAGCTAGGGGGCGTGC_NODE_2_length_300_cov_8.790000	79	.	A	G	72	PASS	NS=8:AN=1:DP=136:AS=CCCAAAAGCCTCGAAGAAGTGGACTGAACAAGCCCTACACCCAAAGCTGG[A/G]GCGGGTAAGGAAGGAGAGTCATTCTTCCAGTACGGTGGCCGGAAGGTTCA	GT:DP:GQ:EC:SG	0:7:48:0:A	0:22:93:0:A	0:39:144:0:A	0:23:96:0:A	0:9:54:0:A	0:10:57:0:A	0/1:23:48:10:R	0:3:36:0:A
9227_GGCCGAGGCGCGGGGCCAGGGACCTAGGCCAGGGG_NODE_2_length_286_cov_16.741259	22	.	G	C	22.62	PASS	NS=8:AN=1:DP=68	GT:DP:GQ:EC:SG	1:2:3:2:C	1:29:84:29:C	1:16:45:16:C	1:7:18:7:C	1:5:12:5:C	1:2:3:2:C	1:6:15:6:C	1:1:1:1:G
10836_GGCCGGCTGCTAACAAAAAGGTTAGAAGTTCAAGT_NODE_2_length_295_cov_21.410170	34	.	A	C	14.57	PASS	NS=7:AN=1:DP=39	GT:DP:GQ:EC:SG	1:3:6:3:C	1:15:48:15:C	1:5:12:5:C	1:2:3:2:C	1:4:9:4:C	.:0:0:0:.	1:6:15:6:C	1:4:9:4:C
8409_GGCCGCCACCGCAGCAGCCGCCCCACCGCTCAACT_NODE_2_length_190_cov_10.289474	146	.	G	A	55.86	PASS	NS=7:AN=1:DP=124:AS=CTTGAACATGCCAACTGTACCCAGCCATTTCGCCAGTGTGGGGCACTAGG[G/A]TTATTTCCAAAGTCCACATATTGACCTGGTCATGAACCTCCTCAGAAGTA	GT:DP:GQ:EC:SG	0:9:54:0:G	0/1:16:65:10:R	0/1:19:24:7:R	0/1:28:38:9:R	1:18:51:18:A	0:8:54:0:G	0:26:105:0:G	.:0:0:0:N
1468_GGCCGGGCAGAGCTGCGTTCAGCTTCACAGCCAGG_NODE_3_length_240_cov_15.979167	234	.	C	T	25.57	PASS	NS=7:AN=1:DP=47	GT:DP:GQ:EC:SG	0/1:18:25:6:Y	.:0:0:0:.	0:1:30:0:C	0/1:2:17:1:C	0:1:30:0:C	0:2:33:0:C	0:1:30:0:C	0/1:22:14:4:C
5377_GGCCGGGCAACACTGCATGGGATTTCCTCTGCCAG_NODE_2_length_195_cov_9.220512	115	.	G	T	49	PASS	NS=8:AN=1:DP=64	GT:DP:GQ:EC:SG	0:11:60:0:G	0:3:36:0:G	0/1:12:47:5:K	0:8:51:0:G	0:19:84:0:G	0:3:36:0:G	0:1:30:0:G	0:7:48:0:G
7463_GGCCGTGGAGACTTCTGAAATTGAGTGCTACCATA_NODE_2_length_222_cov_6.783784	186	.	A	G	30.38	PASS	NS=8:AN=1:DP=48	GT:DP:GQ:EC:SG	0/1:3:8:2:R	0:2:33:0:A	0/1:4:20:3:R	0:9:54:0:A	0/1:13:55:8:R	0/1:7:22:1:A	0/1:8:43:5:R	0/1:2:8:1:A
631_GGCCGCTCACCGAAGGCTTAGAGGTTCAAATGCAC_NODE_2_length_267_cov_7.033708	145	.	G	C	29.5	PASS	NS=8:AN=1:DP=116	GT:DP:GQ:EC:SG	0/1:7:5:2:S	0:6:45:0:G	0/1:39:75:27:S	0/1:18:32:2:G	0/1:13:16:2:G	0/1:8:2:2:G	0:18:60:0:G	0/1:7:1:2:S
10427_GGCCGCTTTCCTCGTGGAAGGGACAGACTCTTCCC_NODE_2_length_317_cov_14.233438	248	.	T	C	126.25	PASS	NS=8:AN=1:DP=331:AS=CTGGGAGAATCTGTGACCAGTTACTGAGGGGAAAGGGAAGGATGAAAACA[T/C]ACACTTGATGACACAATAAACAAGACCCAAACCCGAGAGCACAGAGGCCG	GT:DP:GQ:EC:SG	0:32:123:0:T	0/1:17:61:9:Y	0/1:41:77:15:Y	0:76:214:0:T	0:78:217:0:T	0:39:147:0:T	0/1:36:103:20:Y	0/1:12:68:8:Y
8141_GGCCGAGCGATTAGGTCACTCTGCACAGCTGCAAA_NODE_2_length_307_cov_10.045603	46	.	A	G	23	PASS	NS=8:AN=1:DP=64	GT:DP:GQ:EC:SG	1:2:3:2:G	1:10:27:10:G	1:29:84:29:G	1:6:15:6:G	1:1:1:1:A	1:3:6:3:G	1:12:33:12:G	1:1:15:1:A
8538_GGCCGGGAAACAGGCTGAGAGAGGGAAAGGGGCCA_NODE_2_length_265_cov_12.041510	53	.	G	C	42.75	PASS	NS=8:AN=1:DP=59:AS=TAAACACTGATGTGAAGTGACTGGGCGGGGGTGGAGATCACAAGGTCACA[G/C]GAAGGAAGGCTTTATAAACTATAATAACAATAAATAATGACCATCAACTA	GT:DP:GQ:EC:SG	0:5:42:0:G	0:8:51:0:G	0:7:48:0:G	0:14:69:0:G	0:6:45:0:G	0/1:6:14:1:G	0/1:12:43:5:S	0:1:30:0:G
6474_GGCCGAGGCAACTCAAATCACAGTGGATCTGAAGA_NODE_2_length_273_cov_7.849817	181	.	C	T,G	28.5	PASS	NS=8:AN=2:DP=95	GT:DP:GQ:EC:SG	0/1/2:9:32:4,1:Y	0/2:9:21:1:C	0/1:4:8:2:Y	0/1/2:28:5:6,4:Y	0/2:15:72:6:S	0/2:5:9:1:C	0/2:14:55:5:S	0/2:11:26:4:S
8839_GGCCGAGACCACCGCAGCCAGACCTGGGCCTTGGC_NODE_2_length_316_cov_9.367088	38	.	A	G	12.43	PASS	NS=7:AN=1:DP=35	GT:DP:GQ:EC:SG	1:1:0:1:R	1:11:30:11:G	1:12:33:12:G	1:5:15:5:G	1:3:6:3:G	1:2:1:2:G	1:1:2:1:A	.:0:0:0:.
118_GGCCGTGGGGCGGGGTGGGGCCGGTCCCGGCTGTG_NODE_2_length_204_cov_6.960784	91	.	A	C	17.12	PASS	NS=8:AN=1:DP=57:AS=CCCTGAGTTGGCACCTCTTCTCAGCAGAGCAGGAACCACCGCACTCCCCC[A/C]CTATCCCCTTCTCAGACAAGCAAACTCAGGCCGCGGCACTGCCCCACCAG	GT:DP:GQ:EC:SG	0/1:6:20:4:M	0/1:5:19:3:M	0/1:12:14:6:M	0/1:7:25:4:M	0/1:12:0:10:M	0:1:20:0:A	0/1:12:36:8:M	1:2:3:2:C
10652_GGCCGGGATTCCTCCAGTCTCAGTCAGACCATTAA_NODE_4_length_167_cov_6.155689	43	.	G	T	63.38	PASS	NS=8:AN=1:DP=204	GT:DP:GQ:EC:SG	0/1:18:89:9:K	1:10:27:10:T	0/1:21:64:7:K	0/1:48:37:10:K	0/1:43:60:12:K	0/1:26:71:7:K	0/1:27:97:14:K	0/1:11:62:5:K
5843_GGCCGCTCTGTTGCACTGTGGAACTTGTTTCCTGT_NODE_2_length_266_cov_17.056391	36	.	C	T	66	PASS	NS=8:AN=1:DP=125	GT:DP:GQ:EC:SG	0/1:4:24:3:Y	0:41:150:0:C	0:27:108:0:C	0:18:81:0:C	0:5:42:0:C	0:10:57:0:C	0:19:66:0:C	1:1:0:1:Y
4608_GGCCGCCGACGTGTATGGAGGACTTATTGTGAATC_NODE_2_length_219_cov_5.611872	65	.	G	A	92.38	PASS	NS=8:AN=1:DP=198:AS=TCCAAAGCTTTAGGGAAGCAGGCTGCCACATCCTTCTGCTGCAGAGAGGA[G/A]CGGCTGGTGGGTTCGAACCTTCGGGTTGGCAGCCGAGCGTTTAACCGCTG	GT:DP:GQ:EC:SG	0:19:84:0:G	0:29:114:0:G	0:58:202:0:G	0:30:117:0:G	0:17:78:0:G	0:12:63:0:G	0/1:25:30:6:R	0:8:51:0:G
5457_GGCCGGGAGAGCTGGGCAGGGTCGGATTTCCAGTG_NODE_3_length_241_cov_14.510373	28	.	C	T	8	q10	NS=6:AN=1:DP=22	GT:DP:GQ:EC:SG	1:1:0:1:Y	1:2:3:2:T	1:5:12:5:T	1:4:9:4:T	1:2:3:2:T	.:0:0:0:N	1:8:21:8:T	.:0:0:0:.
11186_GGCCGCAGCTGCTTCCTGGAGGCCACGGAGGTGGA_NODE_2_length_334_cov_15.137725	168	.	C	T	95.12	PASS	NS=8:AN=1:DP=181:AS=AAGGAGCTCCTGGTGGATTAGAACTGCCGACATTTTGTTTAGCAGCCAAA[C/T]GCTTAACCCCTTCACCACCAGGATTTCCTTTCTCTAATTCACATTCTTGT	GT:DP:GQ:EC:SG	0:11:60:0:C	0:41:150:0:C	0:36:135:0:C	0:26:105:0:C	0:21:90:0:C	0:8:51:0:C	0:30:117:0:C	0/1:8:53:5:Y
7432_GGCCGGGGATACCAAGGTAACCACCCCTCCAGCGG_NODE_2_length_260_cov_9.838462	139	.	A	C	94.5	PASS	NS=8:AN=1:DP=245:AS=CTGTTTTCCCTCCCACCCCGGGGGGCGCCAAAGGCCTGCACCGGCCCCTG[A/C]GGGGGCCTGAAGTGTCGCCTACAGGGGAATCACGGGACACAAGGGCACCT	GT:DP:GQ:EC:SG	0:12:66:0:A	0/1:34:54:13:M	1:74:147:74:C	0:57:195:0:A	0:36:144:0:A	0/1:7:35:5:M	0:23:79:0:A	0:2:36:0:A
10595_GGCCGGGGCCCTGAGCCAGCCTGGCCGCCTGGGGC_NODE_2_length_228_cov_10.657895	119	.	C	T	54.5	PASS	NS=8:AN=1:DP=237:AS=GGTTACAATAGGGTATGGGTTTATTGCTGGAGATGGAAGACCAACAGTCT[C/T]AGAAAACAGCGAACTCTTGGGCACTGGCATTCGGGATGGGGGGGCGGATG	GT:DP:GQ:EC:SG	0:7:48:0:C	0/1:9:24:1:C	0:17:50:0:C	0/1:66:59:21:Y	0/1:60:85:30:Y	0/1:22:83:13:Y	0/1:54:84:24:Y	1:2:3:2:T
8962_GGCCGAGGCTGCAGCCCATGGGGGCTCCTTCGCCC_NODE_2_length_256_cov_9.796875	239	.	G	A	30.29	PASS	NS=7:AN=1:DP=58	GT:DP:GQ:EC:SG	0/1:3:18:2:R	.:0:0:0:.	0:3:36:0:G	0/1:23:14:5:R	0/1:12:42:8:R	0:3:36:0:G	1:5:12:5:A	0:9:54:0:G
1417_GGCCGCGGGCGGCAAGGAGGCGGGCCCGGATCCTG_NODE_2_length_223_cov_8.937220	170	.	C	G	127.75	PASS	NS=8:AN=1:DP=1196	GT:DP:GQ:EC:SG	0:126:159:0:C	0/1:49:36:13:S	0/1:158:38:39:C	0:276:225:0:C	0:188:169:0:C	0/1:126:125:17:C	0/1:192:74:46:C	0:81:196:0:C
2560_GGCCGGAAGACGGTGGGGCCGGCCACAGCGCGGGG_NODE_1_length_299_cov_65.020065	111	.	T	A	54.88	PASS	NS=8:AN=1:DP=3491	GT:DP:GQ:EC:SG	0/1:318:147:72:T	0/1:832:2:287:T	0/1:1036:73:433:W	0/1:589:42:207:W	0/1:278:12:100:W	0/1:133:53:50:W	0/1:277:90:133:W	0/1:28:20:7:W
6644_GGCCGCCACCCTGGCTCCCACCCTCACACAGAGTG_NODE_2_length_291_cov_9.718213	128	.	C	A	71.88	PASS	NS=8:AN=1:DP=130	GT:DP:GQ:EC:SG	1:1:3:1:A	0:35:135:0:C	0:37:141:0:C	0:18:84:0:C	0/1:12:50:8:M	0:7:48:0:C	0:17:78:0:C	0:3:36:0:C
10485_GGCCGCACCCCCAACCCCAGCGCGGGGGCCGGGCC_NODE_2_length_159_cov_9.465409	11	.	C	T	17.83	PASS	NS=6:AN=1:DP=9	GT:DP:GQ:EC:SG	0:1:30:0:C	0:2:33:0:C	1:3:6:3:T	0:1:30:0:C	.:0:0:0:.	.:0:0:0:.	1:1:4:1:C	1:1:4:1:C
3087_GGCCGCGAGAGCCGCTTGCACGTGAGTACGTGTGG_NODE_2_length_296_cov_10.962838	34	.	A	G	14.5	PASS	NS=6:AN=1:DP=35	GT:DP:GQ:EC:SG	1:1:0:1:R	1:10:27:10:G	1:6:15:6:G	1:12:33:12:G	1:3:6:3:G	.:0:0:0:.	1:3:6:3:G	.:0:0:0:.
7827_GGCCGGGAAGAGGCTGGTTAGCAGGCCACGGCCAG_NODE_2_length_190_cov_10.578947	24	.	T	C	11.33	PASS	NS=6:AN=1:DP=24	GT:DP:GQ:EC:SG	1:1:6:1:T	1:14:39:14:C	1:5:12:5:C	1:1:6:1:T	1:1:2:1:T	.:0:0:0:.	1:2:3:2:C	.:0:0:0:.
4196_GGCCGCGCTGTGGTCCCACTAGTCTTGGATGGAGC_NODE_2_length_269_cov_12.557621	68	.	C	T	50.38	PASS	NS=8:AN=1:DP=108	GT:DP:GQ:EC:SG	1:8:24:8:T	0/1:29:64:18:Y	1:22:63:22:T	0:24:99:0:C	0:6:45:0:C	0:4:39:0:C	1:10:27:10:T	0:5:42:0:C
10977_GGCCGGAGGGGGAGGGGAGTCTTGAAGGTAACAGC_NODE_2_length_332_cov_18.759037	109	.	A	G	97.88	PASS	NS=8:AN=1:DP=204:AS=CATGCCTGAAAGGACAAGACTATCAAACAATTTCTGTGAACATCTTATCT[A/G]CCTGTCACTTTTCCCAGACCTGAATTTGCATTACTTCATTTAATTCCCTC	GT:DP:GQ:EC:SG	0:16:75:0:A	0:43:156:0:A	0:43:156:0:A	0:25:102:0:A	0/1:26:72:9:R	0:12:63:0:A	0:32:123:0:A	0/1:7:36:3:R
5834_GGCCGTGCTTTATTCCCCTAGCCGTCCCCTAGGGA_NODE_2_length_216_cov_13.564815	103	.	G	A	81.38	PASS	NS=8:AN=1:DP=233	GT:DP:GQ:EC:SG	0/1:5:16:1:G	0/1:29:22:7:R	0/1:25:56:9:R	0:60:183:0:G	0:40:153:0:G	0/1:12:5:3:R	0:58:177:0:G	0:4:39:0:G
6809_GGCCGCTGTGGCGGGACCTTGGAGAAGCTGCTCAC_NODE_2_length_184_cov_17.320652	184	.	C	T	15	PASS	NS=7:AN=1:DP=36	GT:DP:GQ:EC:SG	1:6:15:6:T	1:1:12:1:C	1:8:21:8:T	1:10:30:10:T	1:5:12:5:T	1:3:9:3:T	1:3:6:3:T	.:0:0:0:N
8351_GGCCGAGAAGCCCTGGGGCCCCCAGGCCGAGACTA_NODE_2_length_302_cov_7.860927	234	.	C	A	68.62	PASS	NS=8:AN=1:DP=247	GT:DP:GQ:EC:SG	0/1:20:31:8:M	1:33:87:33:A	0/1:51:32:19:M	0:46:150:0:C	0/1:25:29:9:M	0/1:21:13:4:C	0:45:162:0:C	0:6:45:0:C
10652_GGCCGGGATTCCTCCAGTCTCAGTCAGACCATTAA_NODE_4_length_167_cov_6.155689	78	.	T	G	97.38	PASS	NS=8:AN=1:DP=245	GT:DP:GQ:EC:SG	0:36:135:0:T	0:15:72:0:T	0/1:23:26:6:K	0:48:175:0:T	0:45:165:0:T	0:25:102:0:T	0/1:24:18:3:T	0:29:86:0:T
6613_GGCCGGACGCCCCTGAGCTGCCTGACTTCTCAATG_NODE_2_length_299_cov_19.464884	95	.	G	A	113	PASS	NS=8:AN=1:DP=266:AS=AAATGACTGCTTATTCTGAACTCTTCAGGCATCCTGGCCATCACCCATTT[G/A]TCACATGACACCTGTGTGTGGTAATTTGTGTTTCATATGGTTCCTGCTGG	GT:DP:GQ:EC:SG	0:13:66:0:G	0:42:153:0:G	0:67:211:0:G	0:48:171:0:G	0/1:40:108:25:R	0/1:20:93:12:R	1:32:93:32:A	1:4:9:4:A
2319_GGCCGCTCTCGCCCTCATTGCCCCTCTCTGGGATC_NODE_2_length_268_cov_24.578358	243	.	T	G	68.62	PASS	NS=8:AN=1:DP=119	GT:DP:GQ:EC:SG	0:17:78:0:T	0/1:4:22:1:T	0:6:45:0:T	0:47:167:0:T	0:16:78:0:T	0:13:69:0:T	0:9:63:0:T	0/1:7:27:5:K
2628_GGCCGGGCGGGAGGAGTGAGCTGGCGGGCGGAACG_NODE_2_length_269_cov_20.052044	229	.	T	C	106.5	PASS	NS=8:AN=1:DP=210	GT:DP:GQ:EC:SG	0/1:21:92:14:Y	0:17:78:0:T	0:47:168:0:T	0:49:175:0:T	0:34:132:0:T	0:15:72:0:T	0:16:75:0:T	0:11:60:0:T
8812_GGCCGCAGTTTCCTCAGGGAGAAGCAGCCAGCCAC_NODE_2_length_161_cov_8.900621	110	.	A	G	32.25	PASS	NS=8:AN=1:DP=35	GT:DP:GQ:EC:SG	0:5:42:0:A	0:2:33:0:A	0:7:48:0:A	1:1:0:1:R	0:2:33:0:A	0:1:30:0:A	0/1:11:27:4:R	0:6:45:0:A
8470_GGCCGCAGGGGGAGGTGCACCGGAGAGAAAGGGCC_NODE_2_length_203_cov_5.852217	18	.	C	T	48.5	PASS	NS=8:AN=1:DP=69	GT:DP:GQ:EC:SG	0:3:36:0:C	0:13:66:0:C	0/1:10:22:3:Y	0:10:57:0:C	0:14:69:0:C	0:5:42:0:C	0:13:66:0:C	0:1:30:0:C
356_GGCCGGCCACTCCTTGCAGTCGTCGCTGTCGTTCT_NODE_2_length_319_cov_17.266459	87	.	A	T,G	84.88	PASS	NS=8:AN=2:DP=191:AS=CTAACACACTATTTTTTCCAAAACGTCTGATAAGAAAGAGAAGCAGAAAA[A/T,G]GTGATTTTAGGGAGAAACCGTTTTTAGGACTTCTCTGGTTGGAGGAAAGT	GT:DP:GQ:EC:SG	0/1:4:16:1:A	0:37:138:0:A	0:45:165:0:A	0:33:126:0:A	0:21:65:0:A	0:19:84:0:A	0/2:28:46:15:R	0:4:39:0:A
9944_GGCCGCCAAGAGGAGGCTCCTTAAGGAGCGGATCT_NODE_2_length_246_cov_7.756098	109	.	C	T	50.5	PASS	NS=8:AN=1:DP=426	GT:DP:GQ:EC:SG	0:19:84:0:C	0:74:173:0:C	0/1:93:24:26:Y	0/1:86:9:19:Y	0/1:58:49:7:C	0/1:15:10:4:Y	0/1:63:17:14:Y	0/1:18:38:5:Y
2761_GGCCGTTACGACTCCAGCTGCACTGTTACAACACC_NODE_2_length_175_cov_8.188571	146	.	T	C	29.86	PASS	NS=7:AN=1:DP=66	GT:DP:GQ:EC:SG	1:3:6:3:C	.:0:0:0:.	0:13:66:0:T	0/1:18:78:11:Y	1:1:0:1:C	0/1:14:9:12:Y	0/1:13:38:1:T	0/1:4:12:2:Y
585_GGCCGCGGCGCCCCAACCCATAAACCTGCCGGCGC_NODE_2_length_211_cov_6.772512	207	.	A	C	8	q10	NS=6:AN=1:DP=17	GT:DP:GQ:EC:SG	.:0:0:0:.	.:0:0:0:.	1:2:3:2:C	1:6:15:6:C	1:5:12:5:C	1:1:4:1:A	1:2:3:2:C	1:1:11:1:A
1553_GGCCGCCCTCTGCTCGCTCCTGGATGCTGATGCGA_NODE_2_length_234_cov_10.252137	74	.	A	G	71.75	PASS	NS=8:AN=1:DP=279	GT:DP:GQ:EC:SG	0/1:24:46:8:R	0:37:138:0:A	0/1:71:117:6:A	0/1:54:59:20:R	0/1:33:33:5:A	0/1:19:23:3:A	0:28:117:0:A	0/1:13:41:6:R
9587_GGCCGCGGGGATTGTGGGAAATGTAGTTTCCAGAC_NODE_2_length_307_cov_15.775245	36	.	T	A	18.86	PASS	NS=7:AN=1:DP=49	GT:DP:GQ:EC:SG	.:0:0:0:.	1:18:51:18:A	1:10:27:10:A	1:6:15:6:A	1:5:12:5:A	1:2:3:2:A	1:7:18:7:A	1:1:6:1:T
7394_GGCCGCTTTCCCTCTGTGGAGGGGCCGAGTAGGTG_NODE_2_length_282_cov_9.865249	24	.	A	G	31.12	PASS	NS=8:AN=1:DP=55	GT:DP:GQ:EC:SG	0:4:39:0:A	0:32:126:0:A	1:3:6:3:G	0/1:7:18:1:A	0/1:4:24:1:A	1:1:0:1:R	1:3:6:3:G	0:1:30:0:A
9261_GGCCGTGTACCTCTGTGCCAGCACCTTAGCCACAG_NODE_2_length_305_cov_17.413115	94	.	G	A	48.25	PASS	NS=8:AN=1:DP=104:AS=TCCCTTAAAACCATGTTCTGAAAGGGAGAGGGATAGACCTGGGGATAGAA[G/A]GAAATAATATCTAGTGTAAAATACAAGAAAAACCCAGCACTTGAGAGTAG	GT:DP:GQ:EC:SG	0:4:39:0:G	0:20:87:0:G	0/1:33:46:13:R	0:14:69:0:G	0:14:69:0:G	0:5:42:0:G	1:10:27:10:A	0/1:4:7:2:R
10842_GGCCGCAGAGTGAGGGCGACCCCTGCTGGCCGAGG_NODE_2_length_307_cov_16.501629	126	.	G	A	87.25	PASS	NS=8:AN=1:DP=158:AS=ATTGAAATATTTTATAGAGTCAGAAAATACAGAGCGTAGACCCACACCAT[G/A]TAATTATATATACTGCGACAGTATATAAAACTCCTTATCAAATCCAGATT	GT:DP:GQ:EC:SG	0:7:48:0:G	0:42:153:0:G	0:25:102:0:G	0:34:129:0:G	0/1:10:65:5:R	0:4:39:0:G	0:31:120:0:G	0:5:42:0:G
2178_GGCCGAGCTGGCCCCAGGCACTCACCGTAAATGGG_NODE_2_length_317_cov_9.949527	228	.	A	G	113.12	PASS	NS=8:AN=1:DP=279	GT:DP:GQ:EC:SG	0:20:87:0:A	0:26:105:0:A	0:81:209:0:A	0:58:202:0:A	0/1:26:23:8:R	0:20:90:0:A	0:42:159:0:A	0/1:6:30:4:R
5321_GGCCGCGCAGCCGCTAGAGCTGTTGTCGCCAGCGC_NODE_2_length_348_cov_10.620689	95	.	A	C	43.5	PASS	NS=8:AN=1:DP=123:AS=CCCTGTAAAGCAAAGCTTCCTGTGCTACGTACTCTGAGAGGAGCTTAGTC[A/C]CAGCAAAAGGAAGCGAAGGACGTGGAGAGGCAGGGAAGGAGTGAGGACCA	GT:DP:GQ:EC:SG	1:2:3:2:C	1:37:106:37:C	1:35:102:35:C	1:10:27:10:C	1:15:42:15:C	1:7:18:7:C	1:16:48:16:C	1:1:2:1:A
8182_GGCCGGGGCACTTTTTTACCAGCTTGGTCGTAGAC_NODE_2_length_283_cov_6.533569	179	.	G	T	21.12	PASS	NS=8:AN=1:DP=79:AS=ATAGGCATCCTTCCCTCCAACAAAGGCAGGGTGGTCACAAGAGCGGCAGG[G/T]CAGCAGTGCCCCATTCAGCCCCTCTCCATCCGCTTTGGCGCTGTACTGGA	GT:DP:GQ:EC:SG	1:8:36:8:T	1:3:6:3:T	0/1:13:12:10:K	1:17:57:17:T	1:19:37:18:T	0/1:7:1:6:T	1:11:19:11:T	1:1:1:1:G
7709_GGCCGGGTATTTGCATAGAACGTTATCTGCGGAAT_NODE_2_length_171_cov_6.614035	179	.	G	C	49.43	PASS	NS=7:AN=1:DP=75	GT:DP:GQ:EC:SG	0/1:10:24:4:S	.:0:0:0:N	0:14:69:0:G	0/1:9:31:1:G	0:13:66:0:G	0:9:54:0:G	0:12:63:0:G	0:8:39:0:G
2858_GGCCGACAAAGCGCGCCGCTGGGCCTGGGACAGTG_NODE_2_length_301_cov_6.611296	277	.	T	C	72.62	PASS	NS=8:AN=1:DP=418	GT:DP:GQ:EC:SG	0/1:40:76:4:T	0/1:12:14:3:Y	0/1:21:1:4:Y	0/1:150:110:18:T	0/1:66:91:7:T	0:44:133:0:T	0/1:58:48:19:Y	0:27:108:0:T
7287_GGCCGTGGGAGACAGGATGGGAAGGGAAATCAGCG_NODE_1_length_131_cov_56.541985	41	.	A	G	22.12	PASS	NS=8:AN=1:DP=444	GT:DP:GQ:EC:SG	0/1:56:0:10:A	0/1:10:29:1:A	0/1:18:16:4:R	0/1:69:10:15:R	0/1:86:8:19:R	0/1:50:56:15:R	0/1:70:32:18:R	0/1:85:26:22:R
10523_GGCCGCGTCAGACAGCAGCGTAAGATAGTGATCTC_NODE_2_length_285_cov_8.529824	271	.	T	C	18.14	PASS	NS=7:AN=1:DP=36	GT:DP:GQ:EC:SG	1:3:6:3:C	.:0:0:0:.	1:3:6:3:C	0/1:11:30:4:Y	0/1:5:15:4:Y	1:2:3:2:C	0/1:8:28:4:Y	0:4:39:0:T
4605_GGCCGCCAAGGGGCCTCCGCAGAGAGAGAACCAGT_NODE_2_length_341_cov_20.164223	290	.	A	T	65.12	PASS	NS=8:AN=1:DP=178:AS=TGCCTGGGTTCGAATCCTACTCTGCCACTTGCCAGTGGGGCAAGTTACAT[A/T]ACCTTCTTGTATAAAAGTTTCCTTTTTTTATAAAATGAGAATAATAAAAG	GT:DP:GQ:EC:SG	0:18:81:0:A	0:2:33:0:A	0:16:78:0:A	0/1:47:51:17:W	0/1:17:2:4:W	0:24:99:0:A	0:31:123:0:A	0/1:23:54:10:W
7440_GGCCGGCTGCTCCCAAGTCCCTGGGGGCTCAGCTG_NODE_2_length_316_cov_16.417721	104	.	C	T	65	PASS	NS=8:AN=1:DP=640	GT:DP:GQ:EC:SG	0/1:24:83:13:Y	0/1:183:44:129:Y	0/1:134:42:98:Y	0/1:82:89:38:Y	0/1:92:94:55:Y	0/1:28:59:22:Y	0/1:87:80:53:Y	0/1:10:29:5:Y
7689_GGCCGCCGGAGATCGCAGGGAACAGCCAGCTTCTG_NODE_4_length_155_cov_7.561290	17	.	C	T	41.17	PASS	NS=6:AN=1:DP=34	GT:DP:GQ:EC:SG	.:0:0:0:.	0:2:33:0:C	0:7:48:0:C	0/1:4:22:2:Y	0:3:36:0:C	0:5:42:0:C	0:13:66:0:C	.:0:0:0:.
3252_GGCCGCCGGCTCCTAAGTCCCTGGGGGCTCTGCTG_NODE_2_length_376_cov_13.074468	297	.	T	A	103.38	PASS	NS=8:AN=1:DP=714	GT:DP:GQ:EC:SG	0/1:131:14:99:W	1:28:81:28:A	1:73:130:71:A	1:113:147:109:A	1:115:155:113:A	0/1:51:75:47:A	1:90:140:88:A	0/1:113:85:73:W
1455_GGCCGTTTCGAATCCACCAGGCGCTCCTTGGAAAC_NODE_2_length_373_cov_19.305630	75	.	A	T	48.14	PASS	NS=7:AN=1:DP=155:AS=CTTTTAACCCTTTAGAGACCCATTTTTTTCTGCTTTGAATTTCTTGTTGA[A/T]ACCATGCTTTTTCATGAATGGAAGCATGCGGAATCATTAACTGTGTCGGG	GT:DP:GQ:EC:SG	1:8:21:8:T	0/1:50:77:25:W	0/1:40:65:16:W	0/1:18:38:6:W	1:17:48:17:T	1:7:18:7:T	0/1:15:70:9:W	.:0:0:0:.
8634_GGCCGGGGCTCTCAAAGGGGTAGCCTACACCGGGA_NODE_2_length_309_cov_16.320389	37	.	G	A	7.83	q10	NS=6:AN=1:DP=21	GT:DP:GQ:EC:SG	.:0:0:0:.	1:5:12:5:A	1:2:3:2:A	0/1:2:4:1:G	1:4:9:4:A	1:1:1:1:G	1:7:18:7:A	.:0:0:0:.
4187_GGCCGGCCTGGGGCCCTCGCCCGGCGTGCGCTGCC_NODE_2_length_341_cov_22.190617	88	.	A	C	47.57	PASS	NS=7:AN=1:DP=117:AS=ACTCTAAAATTTGTACTTCCTTCAGGATATCCTTCCCACGGTGTGAAGCA[A/C]ACACTAAACTTTCTCCCCTCCTACAGCACCTTATCCAGAATTTAAAAGCA	GT:DP:GQ:EC:SG	1:7:18:7:C	1:35:102:35:C	1:22:63:22:C	1:8:21:8:C	1:11:30:11:C	1:9:24:9:C	1:25:75:25:C	.:0:0:0:N
7638_GGCCGGGGCCCTACTTCCGTTCCCCCACCAGGCCC_NODE_2_length_324_cov_20.950617	42	.	A	G	17.43	PASS	NS=7:AN=1:DP=42	GT:DP:GQ:EC:SG	.:0:0:0:.	1:16:45:16:G	1:14:42:14:G	1:1:4:1:A	1:2:3:2:G	1:1:2:1:A	1:7:18:7:G	1:1:8:1:A
3522_GGCCGCTTTCCCAGGAGGTGTCTCCGCTTTTCTCC_NODE_2_length_292_cov_18.034246	237	.	T	C	94.25	PASS	NS=8:AN=1:DP=194:AS=GACTGCCCTGACAGGGAACACAACAGAGAACCCCTGAGGGAGGAGGAGAG[T/C]AGTGGGATGCAGACCCCAAATACTTGTAAAAAGACCAGACTTAATGGTCA	GT:DP:GQ:EC:SG	0:13:75:0:T	0:12:66:0:T	0:32:129:0:T	0:42:153:0:T	0:25:120:0:T	0:12:66:0:T	0:33:122:0:T	0/1:25:23:5:Y
9459_GGCCGAGTGGCGTGTGGAGCTGTGTTCAGCTTCCC_NODE_2_length_283_cov_19.268551	174	.	C	T	160.62	PASS	NS=8:AN=1:DP=430:AS=CGCGGCAATTTTTGCAGTTGACTGTTGCAATTCATATACAAGGCATCAGC[C/T]GCTAATCGCGAAGTAGGATACCAAAGTGCTGGTATGAACAGGCTCTCGTA	GT:DP:GQ:EC:SG	0:32:123:0:C	0:45:162:0:C	0:91:218:0:C	0:72:211:0:C	0:74:213:0:C	0/1:46:93:24:Y	0:57:199:0:C	0:13:66:0:C
3351_GGCCGGTACTCAGGAAATGTTTGGACAAGTGAACC_NODE_2_length_194_cov_7.463918	72	.	T	C	40.71	PASS	NS=7:AN=1:DP=52	GT:DP:GQ:EC:SG	.:0:0:0:.	0:6:45:0:T	0:1:30:0:T	0:12:63:0:T	0:12:63:0:T	0:1:30:0:T	0/1:19:24:7:Y	0:1:30:0:T
5377_GGCCGGGCAACACTGCATGGGATTTCCTCTGCCAG_NODE_2_length_195_cov_9.220512	141	.	C	T	40.62	PASS	NS=8:AN=1:DP=51	GT:DP:GQ:EC:SG	0:10:57:0:C	0:1:30:0:C	0/1:10:32:5:Y	0:8:51:0:C	0:14:69:0:C	0:2:33:0:C	0/1:3:17:1:C	0:3:36:0:C
7033_GGCCGGGGCGGAGGCAGAGGGCCCGGCTGTCCCGG_NODE_2_length_276_cov_13.340580	178	.	A	T	31.71	PASS	NS=7:AN=1:DP=80:AS=CAGTGACACTCCTCACGCCCCCATTACCTCTATCTGCAGTTCCCAAGACC[A/T]CTCATCACCTCTGCAGTGTATCCCCATGATGCCCCCGATTCTTTTCCTGG	GT:DP:GQ:EC:SG	1:3:6:3:T	1:15:42:15:T	1:10:27:10:T	1:6:18:6:T	1:13:36:13:T	1:12:33:12:T	1:21:60:21:T	.:0:0:0:N
6324_GGCCGCTCCGGAAGTGGCGCGGGGATTGTGGAAAG_NODE_2_length_169_cov_12.792899	109	.	A	G	40.12	PASS	NS=8:AN=1:DP=182	GT:DP:GQ:EC:SG	0/1:18:25:2:A	0/1:56:76:23:R	0/1:41:47:13:R	0/1:29:57:3:A	0:18:56:0:A	0/1:6:16:1:A	0/1:11:33:5:R	0/1:3:11:2:R
7402_GGCCGAGAAGATTCCAGGTAGGGCTGGGAGAGGCG_NODE_2_length_207_cov_5.734300	144	.	A	C,G	62.5	PASS	NS=8:AN=2:DP=155:AS=CGCAGATGCTGCTGCCGACAGATCTCAGGTCTCAGGAGCGAGAGACTAAC[A/C,G]TCCATAAAGTGCAAACTGCTGAATCTCGGGCTTACTCCAAGACAACTAAC	GT:DP:GQ:EC:SG	0/2:6:15:2:R	2:12:33:12:G	0/1/2:10:31:1,1:A	0:19:84:0:A	0:38:141:0:A	2:24:69:24:G	0/2:36:100:23:R	2:10:27:10:G
5073_GGCCGGGAGTGCGGGGACCACGCGGACCCGCGCGT_NODE_2_length_327_cov_11.532110	248	.	T	C	83.12	PASS	NS=8:AN=1:DP=340	GT:DP:GQ:EC:SG	0/1:20:85:10:Y	0/1:29:65:22:Y	0/1:47:92:27:Y	0/1:69:99:41:Y	0/1:51:69:17:Y	0/1:31:91:15:Y	0/1:66:81:30:Y	0/1:27:83:12:Y
1263_GGCCGTGTACCTCTGTGCCAGTAGCTTAGCCACAG_NODE_2_length_296_cov_17.766891	89	.	C	T	56	PASS	NS=8:AN=1:DP=212	GT:DP:GQ:EC:SG	0/1:6:44:4:Y	0/1:62:3:54:Y	0/1:35:50:10:Y	0/1:47:82:19:Y	0/1:24:92:14:Y	0/1:13:72:8:Y	0/1:22:90:15:Y	0/1:3:15:2:Y
10149_GGCCGCACCAAGCACCTTCTCCTGACGGCCTCGGT_NODE_5_length_177_cov_15.615819	142	.	G	A	46.88	PASS	NS=8:AN=1:DP=238	GT:DP:GQ:EC:SG	0/1:34:47:15:R	1:5:2:5:A	0/1:36:21:6:G	0/1:58:83:38:R	0/1:26:52:18:R	0/1:23:42:7:R	0/1:45:85:29:R	0/1:11:43:6:R
3376_GGCCGCGAGGAGGAGGGGGCATCCAGTGCATGACC_NODE_2_length_284_cov_16.285212	70	.	C	G	84.38	PASS	NS=8:AN=1:DP=202:AS=GCTTTTCAGAATTCAGAGAGAACAAAGCCTTTATGACAATGTTTTACTTT[C/G]CATCTTCTTTGCCAAAGGTGGGTCAGTGGAGGCTTTATACTTGAACGGTT	GT:DP:GQ:EC:SG	0:11:60:0:C	0/1:59:87:40:S	0:61:212:0:C	0:20:87:0:C	0:9:57:0:C	0:11:60:0:C	0/1:25:67:10:S	0:6:45:0:C
3008_GGCCGGCGCCCCTTCACCGCGCTCTGGCTTCTGGG_NODE_2_length_273_cov_16.205128	108	.	C	T	92.12	PASS	NS=8:AN=1:DP=278:AS=GCCGGGACCTAAGAGCTGACCTTTAGGTTAGCGGCCAAGAACTTTAACCA[C/T]TGGCACCAGGGCTCCTTTCCATAAAGGCCAGGGCCTTGAAAACCGTATAG	GT:DP:GQ:EC:SG	1:30:87:30:T	1:39:114:39:T	0/1:40:44:12:Y	0:52:187:0:C	0:35:132:0:C	0/1:27:89:16:Y	0/1:48:66:17:Y	1:7:18:7:T
9052_GGCCGTGCTTCTCAAAATTTATCATAGAAAAGAAC_NODE_2_length_336_cov_21.877975	301	.	G	C	46.57	PASS	NS=7:AN=1:DP=128	GT:DP:GQ:EC:SG	0/1:23:71:13:S	.:0:0:0:.	1:5:12:5:C	0/1:21:55:9:S	1:24:69:24:C	0/1:17:11:5:S	1:12:33:12:C	1:26:75:26:C
6474_GGCCGAGGCAACTCAAATCACAGTGGATCTGAAGA_NODE_2_length_273_cov_7.849817	166	.	C	T	26.75	PASS	NS=8:AN=1:DP=76	GT:DP:GQ:EC:SG	0/1:2:9:1:C	0:8:51:0:C	0/1:4:2:2:C	0/1:26:18:7:Y	0:9:54:0:C	0/1:5:18:1:C	0/1:15:33:6:Y	0/1:7:29:4:Y
4134_GGCCGTGTAAGACATAGCTATCAGTCTCTAATCAT_NODE_2_length_328_cov_11.045732	160	.	A	T	41.62	PASS	NS=8:AN=1:DP=85	GT:DP:GQ:EC:SG	0:5:42:0:A	1:7:18:7:T	1:21:60:21:T	0/1:14:21:7:W	0:11:60:0:A	0:10:57:0:A	0:14:69:0:A	1:3:6:3:T
1462_GGCCGCGCGGCTGCGGAGAGAGCGGGAGTGGGTGG_NODE_2_length_336_cov_11.702381	80	.	A	C	30.75	PASS	NS=8:AN=1:DP=85:AS=ATTTCCAATACCTAGAACTATAGGGTCGCTATGAGTCGGAATGGACTGGA[A/C]GGCAACGGGTTTGGTTTTGGTAGCACAGTGTATTGGGCGATAAGGCACGG	GT:DP:GQ:EC:SG	1:3:6:3:C	1:39:114:39:C	1:20:57:20:C	0/1:6:17:5:M	1:10:27:10:C	1:1:1:1:A	1:5:12:5:C	1:1:12:1:A
6535_GGCCGCCGGGAGGGAAATCGCGGCGGCCCATGCAG_NODE_2_length_265_cov_18.166039	126	.	C	T	132.12	PASS	NS=8:AN=1:DP=288:AS=TTAAAACCCTCTTCTCTGGCTCTCCTTGCCAGTGTATTAAAGCACTTGTC[C/T]GTGAGATTAGATGAGAAGCTTAGGGGGCAGTGAGTCTAAATCAATGGTGA	GT:DP:GQ:EC:SG	0:26:105:0:C	0:56:196:0:C	0:58:202:0:C	0:43:156:0:C	0:42:153:0:C	0/1:11:35:4:Y	0:37:138:0:C	0:15:72:0:C
2924_GGCCGGGCCAGGTGAGGGGTGTGGGCTGAGGAGTC_NODE_2_length_144_cov_4.305555	122	.	G	C	70.14	PASS	NS=7:AN=1:DP=119	GT:DP:GQ:EC:SG	0:7:48:0:G	0:42:153:0:G	0:34:129:0:G	0:19:84:0:G	0/1:2:8:1:G	0:6:45:0:G	1:9:24:9:C	.:0:0:0:.
11039_GGCCGCCTGAAACAAATAGGAGGCCTGTTGGAGAA_NODE_2_length_278_cov_13.989208	278	.	C	T	15.86	PASS	NS=7:AN=1:DP=44	GT:DP:GQ:EC:SG	1:3:6:3:T	.:0:0:0:N	1:10:27:10:T	1:4:9:4:T	1:10:27:10:T	1:6:15:6:T	1:8:21:8:T	1:3:6:3:T
1468_GGCCGGGCAGAGCTGCGTTCAGCTTCACAGCCAGG_NODE_2_length_189_cov_25.164021	70	.	T	G	25.62	PASS	NS=8:AN=1:DP=491	GT:DP:GQ:EC:SG	0/1:6:19:1:T	0/1:202:5:65:K	0/1:100:16:28:K	0/1:51:1:10:T	0/1:48:76:25:K	0/1:21:15:4:T	0/1:62:69:26:K	1:1:4:1:T
9198_GGCCGACATCCTTTCTTTCATCCACACAGCGGTCT_NODE_2_length_242_cov_6.239669	219	.	G	A	26	PASS	NS=8:AN=1:DP=40	GT:DP:GQ:EC:SG	0/1:5:0:2:R	0:1:30:0:G	0/1:10:17:4:R	0:9:54:0:G	1:3:6:3:A	0/1:6:29:1:G	0:4:39:0:G	0:2:33:0:G
2113_GGCCGGGTCGCGCTCCGCTGCTGACACATTTCCTG_NODE_2_length_212_cov_7.768868	160	.	T	C,G	24.12	PASS	NS=8:AN=2:DP=94:AS=CTCCATCTAACTCAGCAGGGGGAAGTCCGTGAATTGTCATTTTTATGGGG[T/C,G]GGGGGCCAGAATCTGGAGTTAAAGCCTCAAAGACTGCGGGAAAGAGAGGC	GT:DP:GQ:EC:SG	2:4:12:4:G	0/1/2:4:23:1,1:T	0/2:14:35:2:T	0/2:40:6:10:K	2:10:27:10:G	2:2:3:2:G	0:15:75:0:T	2:5:12:5:G
11031_GGCCGGGTGGCCAGCCTGGGTAACGAAGAGGTCAC_NODE_2_length_269_cov_10.483272	51	.	T	G	14.25	PASS	NS=8:AN=1:DP=44:AS=AAGGGGAAAAAAGTGCCGCGGCCAGGGGACTCACTGGCATATTCCTTCTG[T/G]AATGTGAATCGCAGCAACCAAGTGCTCCGAAGCACAGCAGACTCAGAACT	GT:DP:GQ:EC:SG	1:2:3:2:G	1:11:30:11:G	1:16:45:16:G	0/1:4:9:3:K	1:3:6:3:G	1:2:3:2:G	1:5:12:5:G	1:1:6:1:T
3584_GGCCGAGATGAAACACATTGCCTGCTTTGTTGCCG_NODE_2_length_299_cov_8.983277	47	.	C	A	10.38	PASS	NS=8:AN=1:DP=39	GT:DP:GQ:EC:SG	1:1:0:1:A	1:8:21:8:A	1:16:48:16:A	0/1:7:3:6:A	1:1:1:1:C	1:4:9:4:A	1:1:1:1:C	1:1:0:1:A
7061_GGCCGTTATGTTAAGTGGAGTCCTTTCCTCTGGTG_NODE_2_length_319_cov_12.056426	290	.	G	A	57.71	PASS	NS=7:AN=1:DP=114	GT:DP:GQ:EC:SG	0:5:42:0:G	.:0:0:0:.	1:7:18:7:A	0:28:111:0:G	0:34:129:0:G	0/1:13:31:5:R	1:16:45:16:A	0/1:11:28:4:R
4191_GGCCGTTTTGAGCGGCTTGCTTTTTGTCCTGGTAG_NODE_2_length_168_cov_7.648809	56	.	T	C	48.62	PASS	NS=8:AN=1:DP=94	GT:DP:GQ:EC:SG	0:9:54:0:T	0:19:84:0:T	0:21:90:0:T	0/1:19:5:3:T	0:7:48:0:T	1:2:3:2:C	0:16:75:0:T	0:1:30:0:T
4962_GGCCGAGTGCCATGGGCAGAAACATTGACACATAC_NODE_3_length_173_cov_4.890173	138	.	C	T	33.38	PASS	NS=8:AN=1:DP=95	GT:DP:GQ:EC:SG	0:1:30:0:C	0/1:28:9:6:Y	0:14:69:0:C	0/1:25:48:2:C	0:6:45:0:C	0/1:13:25:4:Y	0:4:39:0:C	0/1:4:2:2:Y
602_GGCCGGGGGGTGACAGACTTGTTCCTGCTGGGCTC_NODE_2_length_179_cov_6.737430	151	.	C	T	50	PASS	NS=7:AN=1:DP=71	GT:DP:GQ:EC:SG	0:1:30:0:C	1:7:18:7:T	0:12:66:0:C	0:16:75:0:C	0/1:3:8:2:Y	0:12:63:0:C	0:20:90:0:C	.:0:0:0:.
4966_GGCCGGGCGGGGCGTGCCGGATGGGACGTCCCCCT_NODE_2_length_320_cov_20.712500	267	.	A	C	24.75	PASS	NS=8:AN=1:DP=113:AS=CTTTCAGCAAGCAGGGTACTGTCATTTGTGATAACGGTCCTCAAAGCATA[A/C]CGCTAGGCCTCCTCTGCACACTCCTGTTTCTCATTTTAAGAGCCAGGCGC	GT:DP:GQ:EC:SG	0/1:16:18:6:M	0:2:39:0:A	0/1:9:4:4:M	0/1:21:34:3:A	0/1:25:14:22:C	0/1:13:24:12:C	0/1:15:23:10:M	1:12:42:12:C
2138_GGCCGGGAAGGGAGAGGCGGACAGGCAAACGATAA_NODE_2_length_248_cov_10.330646	118	.	C	T	90.12	PASS	NS=8:AN=1:DP=278:AS=CATTTCTGGCCCTGAATAATGTGTGGCCCTCATAAGTCACTGGAGGGCGC[C/T]CTCCGTCGTCAGTCCAGTCCATCTGTCAACTATACAGTCATTTTTTCAGC	GT:DP:GQ:EC:SG	1:10:27:10:T	1:22:66:22:T	1:58:115:58:T	0:46:165:0:C	1:42:109:42:T	1:36:105:36:T	1:56:113:56:T	1:8:21:8:T
8440_GGCCGCCGTGCGCCCCTGAAGCCACGAGGGGGCGA_NODE_2_length_267_cov_8.187266	138	.	C	A	66	PASS	NS=8:AN=1:DP=207:AS=GTAAGACCCTCAACGAGGTGGGTTGACACAGTGGCTGCAACAATGAGCTC[C/A]AACATAACAACGACTGTGAGGACGGCGCAGGACCGGGCAGGGTTTTGTTC	GT:DP:GQ:EC:SG	1:18:51:18:A	1:22:66:22:A	1:42:84:41:A	1:20:57:20:A	1:30:87:30:A	1:20:57:20:A	1:44:93:44:A	1:11:33:11:A
3485_GGCCGAGTGCCATGGGCAGAAAACATTGACACATA_NODE_6_length_160_cov_18.825001	102	.	A	G	89.88	PASS	NS=8:AN=1:DP=500	GT:DP:GQ:EC:SG	0/1:33:50:3:A	0/1:114:111:14:A	0/1:127:150:13:A	0/1:48:51:5:A	0/1:52:39:12:R	0:27:80:0:A	0:87:175:0:A	0:12:63:0:A
721_GGCCGTCTAAGATGCATCAGTTGGTCTCAACCCAC_NODE_2_length_165_cov_4.987879	160	.	C	T	26.71	PASS	NS=7:AN=1:DP=21	GT:DP:GQ:EC:SG	0:2:22:0:C	0:1:30:0:C	0:3:36:0:C	0/1:6:21:3:Y	0/1:3:6:1:C	0:2:33:0:C	0:4:39:0:C	.:0:0:0:N
2000_GGCCGTGTATTACTGTGCGAAAGACACAGTGAGGG_NODE_5_length_210_cov_20.195238	30	.	G	A	66.88	PASS	NS=8:AN=1:DP=109	GT:DP:GQ:EC:SG	0/1:3:25:2:R	0:3:36:0:G	0:10:57:0:G	0:25:102:0:G	0:22:96:0:G	0:3:36:0:G	0:36:135:0:G	0:7:48:0:G
4166_GGCCGCTCCTTGGCAACCAGATGAGGCAGTTCCAC_NODE_2_length_325_cov_8.913846	118	.	G	A	39.25	PASS	NS=8:AN=1:DP=130:AS=GCTTTTAGATAAACTGGCAGCAATGCCTTCCTGCCTTGGCAAAACATAAG[G/A]TAGTTGTTCTCCTTGCTGAGGAAGAAAACGGGCTTCGGCATCAGACAGAG	GT:DP:GQ:EC:SG	1:3:6:3:A	0/1:29:27:7:R	0:42:123:0:G	0/1:9:1:2:G	0/1:19:13:3:G	0:4:39:0:G	0:23:105:0:G	1:1:0:1:A
7892_GGCCGTGGCCCAAGTCCTTTACTGTCCATTGGGGA_NODE_2_length_214_cov_13.271028	72	.	C	T	41.25	PASS	NS=8:AN=1:DP=200	GT:DP:GQ:EC:SG	0/1:9:29:1:C	0/1:35:98:15:Y	0/1:24:39:2:C	0/1:41:16:5:C	0/1:16:51:6:Y	0/1:10:49:4:Y	0/1:55:4:9:C	0/1:10:44:4:Y
9640_GGCCGCGGTGGCGAGCACTACAGCGGCGATTCCGA_NODE_2_length_203_cov_9.492611	75	.	G	T	101.62	PASS	NS=8:AN=1:DP=207:AS=ACTGGAAATCTGCAGCATGCCGGGCCAAACTGAGGGCGAACGGCCACCTA[G/T]GGGCACAAATCCACTATCTGAAGGTAGAGATAAGTGGAGAAAAAGCGTAT	GT:DP:GQ:EC:SG	0:8:51:0:G	0:25:105:0:G	0:54:190:0:G	0:30:123:0:G	0:44:159:0:G	0/1:11:23:4:K	0:31:123:0:G	0:4:39:0:G
3783_GGCCGGGGGTGGCCTAGAGGTCTGTCCCAGCGCAC_NODE_2_length_308_cov_7.327922	124	.	A	C	65.38	PASS	NS=8:AN=1:DP=191:AS=TTCTTCATACTAGTAGTAGACCAAGCACTACTGTGACCAGTGACTTTGTC[A/C]CAACTCTTCCCGACGCTGCTCCCTGGGGGGGCTCAGCTGGGGATCCTTGC	GT:DP:GQ:EC:SG	0:11:60:0:A	0/1:47:59:18:M	1:39:111:39:C	0:41:150:0:A	1:19:54:19:C	0/1:13:23:4:M	1:18:54:18:C	0/1:3:12:2:M
7467_GGCCGTCTGGATCTCCCTGGATGTGATGGTGGAGC_NODE_2_length_208_cov_5.649038	185	.	A	G	16.5	PASS	NS=8:AN=1:DP=52	GT:DP:GQ:EC:SG	1:6:15:6:G	1:3:6:3:G	1:3:6:3:G	1:16:45:16:G	1:12:33:12:G	1:3:6:3:G	1:4:9:4:G	1:5:12:5:G
10012_GGCCGGAAGCGTTTCCTCCAGGAGGGAGCGCGGCG_NODE_2_length_285_cov_11.964912	285	.	C	A	8	q10	NS=7:AN=1:DP=20	GT:DP:GQ:EC:SG	1:4:9:4:A	.:0:0:0:.	1:1:14:1:C	1:3:6:3:A	1:4:12:4:A	1:2:3:2:A	1:3:6:3:A	1:3:6:3:A
7048_GGCCGCGACCCCGCGAGGGTCCTCCGTTCCCAAAC_NODE_2_length_299_cov_10.876254	224	.	T	A	79.88	PASS	NS=8:AN=1:DP=217:AS=TAGGGTTTCCAAGGAGCGGCTGGTGGATTCCAACTGCCGACCTTTTGGTT[T/A]GCAGCTGAGCTCTTAACCACTGCGCCACCAGGGCTCCAAGTATGTGATTG	GT:DP:GQ:EC:SG	0:21:90:0:T	0/1:3:8:1:T	0:25:76:0:T	0:58:202:0:T	0/1:25:42:9:W	0:23:96:0:T	0/1:48:67:19:W	0/1:14:58:10:W
7186_GGCCGAGTGCCCGGCGACACCGACCGGGGCCAGGA_NODE_2_length_166_cov_7.614458	30	.	G	A	48.62	PASS	NS=8:AN=1:DP=111	GT:DP:GQ:EC:SG	0:4:39:0:G	0/1:6:13:5:R	0/1:35:64:22:R	0:27:108:0:G	1:15:42:15:A	1:6:15:6:A	0:17:78:0:G	0:1:30:0:G
6189_GGCCGAGTCCCCTGGCTCCACAGGCTGGATCTTCA_NODE_2_length_149_cov_20.154362	76	.	T	A	57.88	PASS	NS=8:AN=1:DP=409	GT:DP:GQ:EC:SG	0/1:41:104:20:W	0/1:12:49:5:W	0/1:35:102:22:W	0/1:126:30:36:W	0/1:112:1:26:T	0/1:43:64:13:W	1:20:24:19:A	0/1:20:89:12:W
8244_GGCCGGCTCGGCCTGCTCTCGTTCTTTAGGTTGGG_NODE_2_length_295_cov_7.362712	52	.	A	G	17.29	PASS	NS=7:AN=1:DP=44:AS=GGCCTACGGTGGGGGAAACTGACTGGCAGAGTTCATAAGAGGCAAGACCA[A/G]GACAAAATTTCAATCCCTAGAGTCTCGAATCGGCACTAGTTCAACTCCTC	GT:DP:GQ:EC:SG	1:2:3:2:G	1:16:45:16:G	1:12:33:12:G	0/1:4:16:3:R	1:5:12:5:G	1:4:9:4:G	1:1:3:1:A	.:0:0:0:.
1618_GGCCGGGCTGCAGCCGCAGGATGTGGACCTTCCTT_NODE_2_length_309_cov_10.436893	142	.	A	C	78.62	PASS	NS=8:AN=1:DP=238:AS=GACAAGAAGAGTGAGGAGGTCACAGGACCCCTAGAGGTCTTTTTATGTGG[A/C]CTCGGATCCAGCCCACGGAGCCGAAAGCCCACTCTGGGGTGGGTGTCTTT	GT:DP:GQ:EC:SG	1:11:30:11:C	1:52:124:52:C	1:37:108:37:C	1:34:99:34:C	1:30:87:30:C	1:12:36:12:C	1:54:124:54:C	1:8:21:8:C
10364_GGCCGGCTCGTTTATTTATGGTGCTCCATCAGGGG_NODE_2_length_216_cov_11.050926	209	.	G	A	33.25	PASS	NS=8:AN=1:DP=52	GT:DP:GQ:EC:SG	1:3:6:3:A	0:6:51:0:G	0/1:18:57:10:R	0:14:69:0:G	0/1:4:12:2:R	0:2:33:0:G	0/1:4:8:2:G	0:1:30:0:G
2581_GGCCGGCTCGGTCGTAGGCGTGCGTCCCCCGAGCC_NODE_2_length_195_cov_10.974359	169	.	C	A	6.5	q10	NS=6:AN=1:DP=13	GT:DP:GQ:EC:SG	1:2:3:2:A	1:1:7:1:C	1:4:9:4:A	1:4:9:4:A	1:1:6:1:C	1:1:5:1:C	.:0:0:0:N	.:0:0:0:.
1583_GGCCGTTTCATTATTGCATTTGTTATTAGGCAATT_NODE_2_length_217_cov_6.940092	11	.	C	A	5.33	q10	NS=6:AN=1:DP=15	GT:DP:GQ:EC:SG	.:0:16:0:C	1:2:3:2:A	1:7:18:7:A	.:0:0:0:.	1:1:2:1:C	1:1:0:1:A	1:3:9:3:A	1:1:0:1:A
7334_GGCCGGCAGAAAGAATAGAAGAGGGGTATACTATG_NODE_2_length_306_cov_10.382353	121	.	G	A	47.5	PASS	NS=8:AN=1:DP=130:AS=CCCCTTTTCCCAATGACCCCATCCCCGCGTCCCCCAAGCCTGCCCCTGAA[G/A]ACCCCAGAGTTACAGGATAGGCTGTAAGGAGTAGAGGACTTGGGATGCAG	GT:DP:GQ:EC:SG	0/1:9:30:1:G	0/1:24:53:2:G	0/1:33:45:4:G	0:21:67:0:G	0/1:20:46:2:G	0/1:7:37:5:R	0:13:66:0:G	0:3:36:0:G
6320_GGCCGTTTGTAGAATGTAACATGTCTGTTACACGG_NODE_2_length_248_cov_13.673388	115	.	C	T	65.88	PASS	NS=8:AN=1:DP=177:AS=TGGTGTAGCAGGAACAAGATGGCCGTCAAGCCAAAAGACTAGGCTTAAAA[C/T]TCCAGCTCTGCCACTAAACGTGACCTTGGACAAGCTCCTTAACCTCTCAG	GT:DP:GQ:EC:SG	0:2:33:0:C	0:14:69:0:C	0/1:26:77:19:Y	0:31:123:0:C	0/1:26:94:18:Y	0/1:10:60:6:Y	0/1:64:62:50:Y	1:4:9:4:T
2788_GGCCGGAGGCTCTAAGGGACCCAGGAGGAAGGACC_NODE_2_length_307_cov_25.967426	288	.	T	C	56.14	PASS	NS=7:AN=1:DP=73	GT:DP:GQ:EC:SG	0:10:57:0:T	.:0:0:0:.	0:1:30:0:T	0:21:90:0:T	0:21:90:0:T	0:2:33:0:T	0:9:54:0:T	0/1:9:39:5:Y
4033_GGCCGGTACACCTTGGAGGTGGGAGGTGGCCATTA_NODE_2_length_306_cov_11.745098	48	.	A	C	17.86	PASS	NS=7:AN=1:DP=48	GT:DP:GQ:EC:SG	.:0:0:0:.	1:11:30:11:C	1:9:24:9:C	1:10:27:10:C	1:7:18:7:C	1:1:1:1:A	1:9:24:9:C	1:1:1:1:A
4818_GGCCGGCGCTCCCGGAGCTGGGGCCCCGAAGCTGG_NODE_2_length_280_cov_15.082143	106	.	T	C	40.5	PASS	NS=8:AN=1:DP=186:AS=GTGATCTTACTCCCTTTGATATGAAGGCATAAAGCTCCCCCTTCAACTTT[T/C]CCCGTTTTGATCTTCTAAACCATACTGCCTCAGCCAGCACTCTGAAACGG	GT:DP:GQ:EC:SG	0/1:20:33:11:Y	0/1:53:42:27:Y	0/1:40:0:10:Y	0:24:79:0:T	0/1:19:36:9:Y	0/1:7:11:2:T	0:19:84:0:T	0:4:39:0:T
5172_GGCCGCAGTCTGCACCGCACTCAGTTTGCTCAGTT_NODE_2_length_304_cov_22.361841	276	.	G	C	60	PASS	NS=8:AN=1:DP=121	GT:DP:GQ:EC:SG	0:27:108:0:G	0:1:30:0:G	0:7:48:0:G	0:34:129:0:G	0/1:9:29:7:S	0/1:16:1:4:G	0:12:63:0:G	0:15:72:0:G
10346_GGCCGCTAGAGGAGAGAAGCGAGGAATTGGAAAGA_NODE_2_length_338_cov_14.177515	48	.	C	A	15	PASS	NS=6:AN=1:DP=28	GT:DP:GQ:EC:SG	.:0:0:0:.	1:9:27:9:A	1:11:33:11:A	1:4:9:4:A	1:1:3:1:A	1:2:3:2:A	1:1:15:1:C	.:0:0:0:.
7046_GGCCGCGGGCGCACCCGCAGCTCTCGCGACACCTC_NODE_2_length_242_cov_18.760330	45	.	G	C	59	PASS	NS=8:AN=1:DP=195	GT:DP:GQ:EC:SG	0/1:12:44:6:S	0/1:46:78:25:S	0/1:46:73:24:S	0/1:28:84:18:S	0/1:19:65:13:S	0/1:10:34:4:S	0/1:30:84:18:S	0/1:4:10:2:S
423_GGCCGAGAGGCTAGAACTGGAGAGAAGAGCCACCA_NODE_2_length_286_cov_17.566433	144	.	A	G	86.62	PASS	NS=8:AN=1:DP=292	GT:DP:GQ:EC:SG	0:15:72:0:A	0/1:25:26:9:R	0:75:223:0:A	0:48:171:0:A	0/1:36:52:16:R	0:15:72:0:A	0/1:59:48:37:R	0/1:19:29:8:R
4540_GGCCGAGGAGAAACTCGCGGGCCGGGCCGGCTGCC_NODE_2_length_302_cov_13.864239	81	.	A	C	39.14	PASS	NS=7:AN=1:DP=96:AS=ATGTAGGGTGTTGGCCACCTGTTCTTCCACCACCGTCTCTATCTCCACCT[A/C]CTCCTTTGTGGCCACAGCAATGTCACAGCCCATACATGGGGGAGGGGAGC	GT:DP:GQ:EC:SG	1:4:9:4:C	1:44:124:44:C	1:23:75:23:C	1:4:9:4:C	.:0:5:0:A	1:9:24:9:C	1:11:33:11:C	1:1:0:1:A
8423_GGCCGCAGCGCCCCGGGTGCCCCATCGACCTCCCG_NODE_2_length_214_cov_12.985981	32	.	A	C	10.43	PASS	NS=7:AN=1:DP=27	GT:DP:GQ:EC:SG	1:2:3:2:C	1:14:34:14:C	1:2:6:2:C	1:2:6:2:A	1:3:9:3:C	1:3:6:3:C	1:1:9:1:A	.:0:0:0:.
4172_GGCCGAGGGGAGGCCGCTTCGCCCGGGTCAAGGCT_NODE_2_length_323_cov_23.074303	313	.	A	G	49	PASS	NS=7:AN=1:DP=81	GT:DP:GQ:EC:SG	0/1:15:80:9:R	.:0:0:0:.	0:8:51:0:A	0/1:29:80:13:R	0/1:9:21:4:R	0:6:45:0:A	1:5:12:5:G	0:9:54:0:A
2192_GGCCGAGCCCAGCTTTCGGGCCTGGGTGCATGTCT_NODE_1_length_320_cov_36.315624	10	.	T	C	24	PASS	NS=6:AN=1:DP=23	GT:DP:GQ:EC:SG	.:0:0:0:.	0/1:13:57:7:Y	0:1:30:0:T	0/1:5:19:1:T	.:0:0:0:.	1:1:3:1:T	0/1:2:5:1:T	0:1:30:0:T
346_GGCCGGTCCTATGAAATACTTTGCTGTTGTAACAG_NODE_2_length_279_cov_7.272401	155	.	G	A	53.75	PASS	NS=8:AN=1:DP=105:AS=AGACATTGCAAAATATTTAAATAAGATAGGAAAGTAAGCTAGGGCTAAAA[G/A]AACTATTTACCCTTTTCCTGCCCAGTCGTGCAGTTTTTTTAAAGCACCAA	GT:DP:GQ:EC:SG	0:7:48:0:G	0:9:54:0:G	0/1:32:54:18:R	0:21:90:0:G	0:13:66:0:G	0/1:6:13:3:R	0:13:66:0:G	0:4:39:0:G
8312_GGCCGTGGGAACTCTGTGCTTTAGCCTCTTTACCT_NODE_2_length_195_cov_14.271795	167	.	C	T	62.75	PASS	NS=8:AN=1:DP=153	GT:DP:GQ:EC:SG	0/1:9:9:3:Y	0/1:19:55:13:Y	0/1:21:65:13:Y	0:51:181:0:C	1:18:57:18:T	1:11:36:11:T	0:17:81:0:C	1:7:18:7:T
6680_GGCCGAGAACTAGCTGTACCGCTTGACGTGATTTA_NODE_2_length_320_cov_13.818750	284	.	G	A	36.5	PASS	NS=8:AN=1:DP=78	GT:DP:GQ:EC:SG	0:5:42:0:G	0:2:33:0:G	1:15:11:14:A	0:20:87:0:G	1:1:6:1:G	0/1:10:23:5:R	0/1:11:51:7:R	1:14:39:14:A
8812_GGCCGCAGTTTCCTCAGGGAGAAGCAGCCAGCCAC_NODE_2_length_161_cov_8.900621	81	.	C	T	29.88	PASS	NS=8:AN=1:DP=34	GT:DP:GQ:EC:SG	1:2:3:2:T	0:2:33:0:C	0:11:60:0:C	0:6:45:0:C	1:2:3:2:T	0:1:30:0:C	0:5:42:0:C	0/1:5:23:1:C
834_GGCCGCAGGGAAGTGCGAGTGCTCCTCGGGCTTCA_NODE_2_length_168_cov_8.119047	129	.	T	C	45.88	PASS	NS=8:AN=1:DP=100	GT:DP:GQ:EC:SG	0/1:10:26:5:Y	0:6:45:0:T	0:14:69:0:T	0:20:87:0:T	0/1:21:38:8:Y	0/1:7:8:3:Y	0/1:17:52:9:Y	0:5:42:0:T
36_GGCCGCAGCTTCCCCCAAGACAGCGCCGCCTGCTG_NODE_2_length_304_cov_15.677631	19	.	C	A	14.67	PASS	NS=6:AN=1:DP=36	GT:DP:GQ:EC:SG	.:0:0:0:.	1:3:6:3:A	1:15:42:15:A	0/1:5:4:4:M	1:4:9:4:A	1:1:6:1:C	1:8:21:8:A	.:0:0:0:.
5241_GGCCGTGAGCAGTGAGAATCTGTACCTTCATTGTC_NODE_2_length_220_cov_11.954545	96	.	T	C	31.12	PASS	NS=8:AN=1:DP=79:AS=ATTGCCTGGAAAATGGTGTGGATTCTGTTGAAAACATGGATAAACAAACA[T/C]GCTCAGGACTCCCGTGCCCCTCTACCGTGAAGGTGGTGTAGATTTAATAC	GT:DP:GQ:EC:SG	1:2:3:2:C	0/1:11:34:4:Y	0/1:11:71:7:Y	0/1:32:75:11:Y	1:5:12:5:C	1:8:21:8:C	1:9:24:9:C	1:1:9:1:T
6651_GGCCGCTCGATGCATAACTGGGCAGGCGCAAAACT_NODE_2_length_223_cov_13.484305	26	.	A	C	29.62	PASS	NS=8:AN=1:DP=87	GT:DP:GQ:EC:SG	1:3:6:3:C	1:13:36:13:C	1:19:54:19:C	1:21:60:21:C	1:11:30:11:C	1:6:15:6:C	1:7:18:7:C	1:7:18:7:C
7850_GGCCGCCCACCAACTAACACCACCAGCACCACCGC_NODE_1_length_214_cov_20.411215	104	.	C	T	74	PASS	NS=7:AN=1:DP=137	GT:DP:GQ:EC:SG	.:0:0:0:.	0:39:144:0:C	0:43:99:0:C	0/1:13:41:4:Y	0:21:90:0:C	0:9:54:0:C	0:10:57:0:C	0:2:33:0:C
5692_GGCCGACTGAACGGCGAGCCCGTGGGCAGGCGACA_NODE_2_length_324_cov_11.885802	213	.	T	C	71.88	PASS	NS=8:AN=1:DP=230	GT:DP:GQ:EC:SG	1:25:72:25:C	1:16:45:16:C	1:30:87:30:C	0:49:156:0:T	0/1:48:86:21:Y	0/1:19:38:6:Y	0/1:39:78:15:Y	0/1:4:13:1:T
8498_GGCCGGCACGAGCCAACTGAAGCTGTGGTTCCTCA_NODE_2_length_274_cov_5.000000	163	.	C	T	68	PASS	NS=8:AN=1:DP=200:AS=CCTCGGGTTAGTCTCCAAAGAAAGCCGGCTTGAGTCAGCTGGCAGGAGAG[C/T]GAGGCCAGCGCGGTGGCGGTTATGGCCGAGATGGCCCCAGTTCAACACTT	GT:DP:GQ:EC:SG	0/1:11:31:4:Y	1:32:96:32:T	0/1:39:57:19:Y	0/1:44:57:22:Y	1:29:87:29:T	0:9:54:0:C	0:30:117:0:C	0:6:45:0:C
4970_GGCCGTGGGCGGCCAGGGAGGGTCACCTTCAACCA_NODE_4_length_146_cov_19.034246	39	.	A	T	8.67	q10	NS=6:AN=1:DP=9	GT:DP:GQ:EC:SG	1:2:3:2:T	.:0:0:0:N	1:1:6:1:T	1:1:12:1:A	1:1:15:1:A	.:0:0:0:N	1:3:6:3:T	1:1:10:1:A
10031_GGCCGTGTACCTCTGTGCCAGCAGCTTAGACACAG_NODE_1_length_159_cov_21.735849	165	.	A	C,G	25.88	PASS	NS=8:AN=2:DP=47	GT:DP:GQ:EC:SG	2:1:5:1:A	0/2:17:55:9:R	0:5:42:0:A	2:9:24:9:G	0/1/2:7:0:1,5:R	0:4:39:0:A	0:3:36:0:A	2:1:6:1:A
9248_GGCCGATAAGCCCGCAACCAGCCGGGAGGCTCCGG_NODE_2_length_161_cov_21.329193	11	.	C	G	21.86	PASS	NS=7:AN=1:DP=49	GT:DP:GQ:EC:SG	1:1:15:1:C	1:1:0:1:S	1:21:60:21:G	1:10:27:10:G	1:13:39:13:G	1:1:9:1:C	1:2:3:2:G	.:0:0:0:.
864_GGCCGGTCCTCCCCCGGAGACTCCCGCGGAGCTCC_NODE_2_length_214_cov_5.060748	11	.	A	C	2.88	q10	NS=8:AN=1:DP=15	GT:DP:GQ:EC:SG	1:1:0:1:A	1:1:1:1:A	1:5:12:5:C	1:1:0:1:A	1:2:3:2:C	1:2:3:2:C	1:2:3:2:C	1:1:1:1:A
8338_GGCCGTCATGGTCCCGAAACCTTCTGTTGGTCCAG_NODE_2_length_239_cov_7.054393	49	.	G	T	31.43	PASS	NS=7:AN=1:DP=32	GT:DP:GQ:EC:SG	.:0:0:0:.	0:4:39:0:G	0:5:42:0:G	0/1:13:28:5:K	0:3:36:0:G	0:1:30:0:G	0:3:36:0:G	0/1:3:9:1:G
4196_GGCCGCGCTGTGGTCCCACTAGTCTTGGATGGAGC_NODE_2_length_269_cov_12.557621	109	.	T	G	69.5	PASS	NS=8:AN=1:DP=157	GT:DP:GQ:EC:SG	1:14:39:14:G	0/1:32:82:14:K	1:15:42:15:G	0:33:126:0:T	0:25:102:0:T	0:9:54:0:T	1:20:57:20:G	0:9:54:0:T
2346_GGCCGCCGTCTCTCCGCACGCTGCCACGCGCAAGG_NODE_2_length_251_cov_5.250996	229	.	G	C	26	PASS	NS=8:AN=1:DP=51	GT:DP:GQ:EC:SG	0/1:4:19:3:S	0:1:30:0:G	0:10:57:0:G	0/1:11:11:2:G	0/1:10:35:5:S	0/1:5:22:1:G	0/1:7:22:1:G	0/1:3:12:1:G
10187_GGCCGCGGCCAGCGCACCCGACCTTAGTGCCGCTC_NODE_2_length_160_cov_12.312500	147	.	C	G	7.71	q10	NS=7:AN=1:DP=23	GT:DP:GQ:EC:SG	1:7:18:7:G	1:1:10:1:C	1:4:9:4:G	0/1:4:4:3:S	1:3:6:3:G	.:0:0:0:N	1:3:6:3:G	1:1:1:1:C
4493_GGCCGCGGGGACCATTGACAGCGCGAGGCTGACTA_NODE_5_length_200_cov_6.515000	61	.	C	T	20.83	PASS	NS=6:AN=1:DP=47:AS=CTTTCCAAGCCAACTGCTAGGCAGTCTGATCAAATGAGTACTTTTACATG[C/T]GCTTTCTGGAGACAGCATCTTGAAAGTAGTGAGCCTGTAGGTGGAAATTA	GT:DP:GQ:EC:SG	.:0:0:0:.	1:12:33:12:T	1:18:51:18:T	0/1:6:17:5:Y	1:7:18:7:T	1:2:3:2:T	1:2:3:2:T	.:0:0:0:.
11133_GGCCGCCTCCCGTCGCCGACCACAAAGACCAAATG_NODE_2_length_214_cov_12.518692	101	.	G	A	101.5	PASS	NS=8:AN=1:DP=238:AS=CTGAGCAAAGATCTAGAAACATGCAGCTTCCTAAAGAGCGACGCGGAGGA[G/A]AGTTTGGTTCCGGAACAGAACTCCAAGGCTCAAGTTCCCCAACCCGGGCA	GT:DP:GQ:EC:SG	0:11:60:0:G	0:46:165:0:G	0:46:165:0:G	0:48:175:0:G	0/1:37:52:13:R	0:18:81:0:G	0:28:111:0:G	0/1:4:3:1:G
6897_GGCCGTCCCTAATCTCCAAACTTTCCCCTTCAACT_NODE_2_length_304_cov_7.000000	135	.	C	T	90.5	PASS	NS=8:AN=1:DP=174:AS=ACACAGAAAAAAGGAGTCTCCTTAGTAGAGTTGAAATGATGAAGTGTCTC[C/T]CTTCCCACGTCTCCGCAGTGAAACCCATCTGTACACTGCCTAGTTGGAAC	GT:DP:GQ:EC:SG	0/1:10:43:5:Y	0:48:171:0:C	0:31:120:0:C	0:29:114:0:C	0:20:87:0:C	0:1:30:0:C	0:34:129:0:C	0:1:30:0:C
9399_GGCCGGGGGTGGAAGTCTCCCTGGGGCCAGCAGTG_NODE_2_length_152_cov_7.368421	20	.	G	A	37.57	PASS	NS=7:AN=1:DP=39	GT:DP:GQ:EC:SG	1:4:12:4:A	0/1:9:38:4:R	0:4:39:0:G	0:15:72:0:G	.:0:0:0:.	0:1:30:0:G	0:3:36:0:G	0:3:36:0:G
5172_GGCCGCAGTCTGCACCGCACTCAGTTTGCTCAGTT_NODE_2_length_304_cov_22.361841	234	.	C	A	130	PASS	NS=8:AN=1:DP=365	GT:DP:GQ:EC:SG	0:52:187:0:C	0:2:33:0:C	0:59:182:0:C	0:71:210:0:C	0/1:30:58:19:M	0/1:57:56:26:M	0:63:194:0:C	0:31:120:0:C
2788_GGCCGGAGGCTCTAAGGGACCCAGGAGGAAGGACC_NODE_2_length_307_cov_25.967426	138	.	C	T	122.38	PASS	NS=8:AN=1:DP=253:AS=CAAGGACTTAGGGGTAACCATATAGTTTTGGGGAATGGTCAGAGGACTTA[C/T]CTGTAAGCTGAGGTTTCATAGCAAGCACACTAATTTTACTTAAAATGTTT	GT:DP:GQ:EC:SG	0:25:105:0:C	0:34:129:0:C	0:33:132:0:C	0:60:205:0:C	0:28:111:0:C	0:15:72:0:C	0:41:153:0:C	0/1:17:72:9:Y
1533_GGCCGCGTCCCTCCCAGCGCGCAGTTTCCGTATTT_NODE_2_length_270_cov_18.211111	139	.	A	C	107.25	PASS	NS=8:AN=1:DP=219:AS=CCACACAACTGCGATGGGAGAGAGAATACGAGACCCTTCCCCAGCAGCGG[A/C]GGCCCGGAATAACCCCCGTCAGCAATGGAAGGGAAAAAACAGAAACTTAC	GT:DP:GQ:EC:SG	0/1:19:56:7:M	0:28:111:0:A	0:48:175:0:A	0:31:120:0:A	0:28:117:0:A	0:16:75:0:A	0:42:156:0:A	0:7:48:0:A
2226_GGCCGGCCGCCTGTTTATATTAGCGCGGTGTAAAA_NODE_2_length_274_cov_13.302919	33	.	T	C	37	PASS	NS=7:AN=1:DP=61	GT:DP:GQ:EC:SG	0/1:2:2:1:T	0/1:19:71:9:Y	0/1:11:18:3:Y	0:13:66:0:T	0/1:5:15:2:Y	.:0:0:0:.	0:9:54:0:T	0:2:33:0:T
1139_GGCCGACAAGCACTTCCTGTAGCGACATCTCCAAT_NODE_2_length_271_cov_7.726937	32	.	G	A	34	PASS	NS=6:AN=1:DP=24	GT:DP:GQ:EC:SG	.:0:0:0:.	0:10:57:0:G	0:5:42:0:G	0:3:36:0:G	0:2:33:0:G	0:2:33:0:G	1:2:3:2:A	.:0:0:0:.
9678_GGCCGAGAAGGTTCCGCGTGGGACTGTAGAGGGAC_NODE_2_length_207_cov_8.661836	104	.	T	C	35.25	PASS	NS=8:AN=1:DP=431	GT:DP:GQ:EC:SG	0/1:18:18:2:T	0/1:61:55:21:Y	0/1:73:53:24:Y	0/1:74:38:20:Y	0/1:56:5:9:T	0/1:23:62:9:Y	0/1:107:36:34:Y	0/1:19:15:5:Y
10031_GGCCGTGTACCTCTGTGCCAGCAGCTTAGACACAG_NODE_1_length_159_cov_21.735849	159	.	A	G	27.12	PASS	NS=8:AN=1:DP=62	GT:DP:GQ:EC:SG	1:1:0:1:R	0/1:22:95:12:R	0:5:45:0:A	1:13:36:13:G	0/1:12:3:11:G	0/1:5:2:1:A	0:3:36:0:A	1:1:0:1:R
7979_GGCCGCTCGGGCCGCGACAGTCGCGCCATCACCAC_NODE_2_length_276_cov_8.844203	260	.	T	G	46.12	PASS	NS=8:AN=1:DP=80	GT:DP:GQ:EC:SG	0:9:54:0:T	0:1:30:0:T	0/1:11:32:8:K	0:17:81:0:T	0/1:12:51:7:K	0:5:42:0:T	0:15:75:0:T	0/1:10:4:3:K
2756_GGCCGGAGGCTAATGAAACTTGTACTTATTTGAAT_NODE_2_length_346_cov_17.777456	289	.	T	C	104.12	PASS	NS=8:AN=1:DP=274:AS=GTGCCTTCTCCCTGTGAATGGTGAAGTTGGGATCTCCCATACCCTCCCAT[T/C]CATCTTGGAAAGGAGCCTCCACCCTCCACTCATTTCTAGCCATCTGTTTC	GT:DP:GQ:EC:SG	0:17:81:0:T	0:7:48:0:T	0:18:81:0:T	0:62:210:0:T	0:48:171:0:T	0:29:117:0:T	0/1:74:68:45:Y	1:19:57:19:C
9686_GGCCGGCCCATCGCAGTCGGAGGCCTCCTCACCTG_NODE_2_length_266_cov_18.800753	126	.	G	A	124.75	PASS	NS=8:AN=1:DP=287	GT:DP:GQ:EC:SG	0:10:57:0:G	0:27:108:0:G	0:90:232:0:G	0:47:171:0:G	0:34:129:0:G	0:20:87:0:G	0:41:150:0:G	0/1:18:64:10:R
7553_GGCCGCGCGAAGGGCCGGGAAGGCGAGGTTTCCGG_NODE_2_length_307_cov_13.039088	98	.	C	A	53.88	PASS	NS=8:AN=1:DP=141:AS=TTCAGTTAGCAGCCTCTACTTACCCAAAAAATAATAACAACAAAAAAAAA[C/A]CGTTGCCTTCGAGTGGATTCCAACTCACAGCGACCTTACAGGACAAAGTG	GT:DP:GQ:EC:SG	0/1:8:9:5:M	1:30:52:30:A	0:32:123:0:C	0/1:22:21:5:C	0:14:69:0:C	0:5:45:0:C	0:23:96:0:C	0/1:7:16:2:C
10950_GGCCGTTTTGAGCGGCTTGCTTTTTCTCCTGGTAG_NODE_4_length_170_cov_8.323529	95	.	A	G	36.33	PASS	NS=6:AN=1:DP=37	GT:DP:GQ:EC:SG	0:4:39:0:A	0/1:9:27:1:A	0/1:8:39:5:R	0:14:69:0:A	.:0:0:0:.	0:1:30:0:A	1:1:14:1:A	.:0:0:0:.
1423_GGCCGTCCGGATCGACCAGGAGATTAACAAGATCC_NODE_2_length_149_cov_6.946309	130	.	A	T	13.12	PASS	NS=8:AN=1:DP=34	GT:DP:GQ:EC:SG	1:10:30:10:T	1:1:12:1:A	1:2:3:2:T	1:3:9:3:T	1:3:9:3:T	1:4:9:4:T	1:6:18:6:T	1:5:15:5:T
1468_GGCCGGGCAGAGCTGCGTTCAGCTTCACAGCCAGG_NODE_3_length_240_cov_15.979167	140	.	A	G	40.88	PASS	NS=8:AN=1:DP=330	GT:DP:GQ:EC:SG	0/1:144:109:72:R	0/1:4:13:1:A	0/1:14:8:4:A	0/1:40:30:13:R	0/1:12:23:4:R	0/1:19:7:4:A	0/1:11:35:1:A	0/1:86:102:46:R
459_GGCCGGCCCGGGGTCTGTCCTCCCCGGTGCTCCTT_NODE_2_length_227_cov_6.220264	202	.	G	A	48.12	PASS	NS=8:AN=1:DP=82	GT:DP:GQ:EC:SG	0/1:8:14:4:R	0:2:33:0:G	0:19:87:0:G	0:17:81:0:G	0/1:11:40:7:R	0/1:4:7:2:R	0:19:90:0:G	0:2:33:0:G
721_GGCCGTCTAAGATGCATCAGTTGGTCTCAACCCAC_NODE_2_length_165_cov_4.987879	71	.	C	T	20.67	PASS	NS=6:AN=1:DP=26	GT:DP:GQ:EC:SG	.:0:0:0:.	0/1:4:4:2:Y	0/1:3:10:1:C	0/1:10:34:4:Y	1:2:3:2:T	.:0:0:0:.	0/1:6:43:4:Y	0:1:30:0:C
9315_GGCCGTTAATGACGTCTAAGCGCAGCGCCGAGCTC_NODE_2_length_293_cov_12.259386	81	.	C	G	70.25	PASS	NS=8:AN=1:DP=119	GT:DP:GQ:EC:SG	0:11:60:0:C	0:31:120:0:C	0:26:108:0:C	0:21:90:0:C	0:8:54:0:C	0/1:10:40:4:S	0:9:54:0:C	0:3:36:0:C
7457_GGCCGCCAACCGCTGCCCTTCCGTGCGCTCCGGAC_NODE_2_length_312_cov_6.939103	149	.	C	G	61	PASS	NS=8:AN=1:DP=205:AS=AAAAGGAATCACTGCTTTAATTTTAAAGTTTTGCTGGGACCAAGAAAAGG[C/G]CTGATTCCAGATATTTCTGGGTTTCCGGGGGGTAGGACGAAAGCCTCTTC	GT:DP:GQ:EC:SG	0/1:23:62:13:S	0:35:132:0:C	0/1:40:45:15:S	0/1:33:39:11:S	1:24:69:24:G	0/1:13:58:9:S	0/1:34:47:14:S	0:3:36:0:C
3671_GGCCGGCGGCAGCCGCTGCTTGGTGGAGGCCGCGG_NODE_2_length_200_cov_7.645000	67	.	G	A	36	PASS	NS=6:AN=1:DP=55	GT:DP:GQ:EC:SG	0:12:63:0:G	0/1:11:1:10:R	0/1:2:7:1:G	.:0:0:0:.	0:4:39:0:G	.:0:0:0:.	0:3:36:0:G	0:23:70:0:G
2912_GGCCGACAAAGTGCGCCGCCGGGCCTGGGACGGTG_NODE_2_length_268_cov_5.059701	209	.	A	T	72.38	PASS	NS=8:AN=1:DP=193	GT:DP:GQ:EC:SG	0/1:8:31:1:A	0/1:31:16:5:A	0:31:120:0:A	0/1:26:67:12:W	0:28:84:0:A	0/1:8:33:1:A	0:55:183:0:A	0:6:45:0:A
837_GGCCGACGCGATGGTGTGGGCTCTTCTCGTTCACG_NODE_2_length_181_cov_12.640884	106	.	C	G	116.62	PASS	NS=8:AN=1:DP=274:AS=GCAGTTCAAATGCGCCAGGCGCTTCTTGGAATCTGTGGGACAGTTCTACT[C/G]TGTCCTATAGGGTCGCTATCGACTCGACGGCAGTGGGTTTGGGTTTTTTT	GT:DP:GQ:EC:SG	0:12:63:0:C	0:23:96:0:C	0:73:214:0:C	0:60:206:0:C	0/1:23:20:5:S	0:25:102:0:C	0:52:187:0:C	0:6:45:0:C
9477_GGCCGAGCAACTGGCACCCGACAAAGCCAATCAGA_NODE_2_length_280_cov_13.096429	138	.	G	T	95	PASS	NS=8:AN=1:DP=349	GT:DP:GQ:EC:SG	0:30:117:0:G	0/1:76:54:56:K	1:51:111:51:T	0:59:201:0:G	0/1:54:57:24:K	0:25:102:0:G	1:45:102:45:T	0/1:9:16:3:K
3008_GGCCGGCGCCCCTTCACCGCGCTCTGGCTTCTGGG_NODE_2_length_273_cov_16.205128	204	.	T	C	75.25	PASS	NS=8:AN=1:DP=242:AS=TATAGAGCGCAGTTCTACCCTGCGCACATGGGGGCGCAGTTGGAATTGAC[T/C]GAAGGGCAATTGGCTTGGTTTAGTTTTGGTTCCCTTATTTATCCCACAAG	GT:DP:GQ:EC:SG	1:10:27:10:C	1:5:15:5:C	0/1:11:39:1:T	0:90:222:0:T	0:45:162:0:T	0/1:24:82:14:Y	0/1:54:46:17:Y	1:3:9:3:C
7440_GGCCGGCTGCTCCCAAGTCCCTGGGGGCTCAGCTG_NODE_2_length_316_cov_16.417721	70	.	A	C	36.38	PASS	NS=8:AN=1:DP=775	GT:DP:GQ:EC:SG	0/1:19:28:2:A	0/1:261:138:52:A	0/1:175:54:38:A	0/1:92:21:22:M	0/1:104:13:21:A	0/1:25:22:5:M	0/1:93:2:19:A	0/1:6:13:2:M
1131_GGCCGACAGTCGCGTTGGACCCTCGAGGGTCTCGA_NODE_2_length_293_cov_15.686007	68	.	A	C	29.14	PASS	NS=7:AN=1:DP=75	GT:DP:GQ:EC:SG	1:10:27:10:C	1:18:51:18:C	1:19:54:19:C	1:10:27:10:C	1:4:9:4:C	1:4:9:4:C	1:10:27:10:C	.:0:0:0:.
10296_GGCCGCAGCCCTGCTGGTGCCCGCGGGGTGAGCCT_NODE_2_length_277_cov_10.212996	248	.	A	G	48.12	PASS	NS=8:AN=1:DP=110	GT:DP:GQ:EC:SG	0:7:48:0:A	1:12:33:12:G	1:14:42:14:G	0/1:27:58:13:R	0:26:114:0:A	0:4:42:0:A	0/1:13:44:9:R	0/1:7:4:2:A
3558_GGCCGGGCAACGGCGGAGTAGCCGCCCACCTGTCT_NODE_2_length_179_cov_6.765363	119	.	C	A	20.75	PASS	NS=8:AN=1:DP=59	GT:DP:GQ:EC:SG	1:5:1:5:A	1:8:24:8:A	1:6:18:6:A	1:21:69:21:A	1:6:21:6:A	1:4:9:4:A	1:7:21:7:A	1:2:3:2:A
9413_GGCCGCGGGGCGGTTAGAGCACAGGCTTTGGAGTC_NODE_2_length_217_cov_35.714287	30	.	T	C	34.12	PASS	NS=8:AN=1:DP=164	GT:DP:GQ:EC:SG	0/1:17:54:10:Y	0/1:44:37:16:Y	0/1:35:25:11:Y	0/1:27:21:8:Y	0/1:16:44:8:Y	0/1:7:24:4:Y	0/1:13:52:7:Y	0/1:5:16:3:Y
8055_GGCCGGGCAAGTGTCTGTGCGCGAGGAAGAGGGAA_NODE_2_length_270_cov_12.307407	23	.	C	T,G	17.43	PASS	NS=7:AN=2:DP=48	GT:DP:GQ:EC:SG	2:2:3:2:G	2:20:60:20:G	2:9:24:9:G	2:4:9:4:G	2:1:6:1:C	2:6:15:6:G	1/2:6:5:1,5:K	.:0:0:0:.
8977_GGCCGAGAAGGTCCCGCGTGGGACTGTAGAGGGAC_NODE_1_length_227_cov_23.440529	70	.	C	T	38.12	PASS	NS=8:AN=1:DP=637	GT:DP:GQ:EC:SG	0/1:40:45:5:C	0/1:160:26:57:Y	0/1:133:87:25:C	0/1:93:35:32:Y	0/1:74:52:12:C	0/1:48:15:11:Y	0/1:78:21:16:C	0/1:11:24:4:Y
7503_GGCCGCCCGGAGCACGAGTCGAGCGCGTCAGTCGT_NODE_2_length_308_cov_7.185065	222	.	G	A	51.38	PASS	NS=8:AN=1:DP=267:AS=GGAGTGGAGGGTTGTGGGAGGAACTCCCAACAGCTCAGATAAAACCCAGG[G/A]AAACGCCGGTAAACTCCCCTGGCAACATTCCAGGACCTAAGAGCTCTTTG	GT:DP:GQ:EC:SG	1:16:45:16:A	0:27:111:0:G	0/1:41:28:15:R	0/1:78:41:32:R	0/1:38:28:14:R	1:13:42:13:A	1:45:84:45:A	0/1:9:32:1:G
2425_GGCCGCTGTGCAGACACGTGGGAATGAAGCCCCCT_NODE_2_length_232_cov_5.025862	124	.	A	G	45.86	PASS	NS=7:AN=1:DP=91:AS=GACTAGGTGGGCGTGGGGGGGGGTTCCCAGAAAAGGGAAACTCTACATTC[A/G]TATGTTGATGGGGCGGTGTATGTGGTGATTTGTGGAGCCACTGACAGTCC	GT:DP:GQ:EC:SG	0/1:4:12:1:A	0/1:14:83:8:R	0/1:36:107:16:R	0/1:19:77:8:R	0/1:5:9:1:A	1:9:24:9:G	1:4:9:4:G	.:0:0:0:.
9731_GGCCGTCCGCGGTCTTGGGTCTCATTCCAGCCCCT_NODE_2_length_165_cov_13.666667	148	.	C	T	28	PASS	NS=7:AN=1:DP=44	GT:DP:GQ:EC:SG	0/1:2:7:1:C	1:5:12:5:T	0/1:20:40:8:Y	0:2:33:0:C	0:7:48:0:C	0:2:36:0:C	0/1:6:20:3:Y	.:0:0:0:.
1246_GGCCGCGGGCGGCAAGGAGGCGGGCCCGGANCCTG_NODE_2_length_244_cov_5.950819	132	.	G	T	188	PASS	NS=8:AN=1:DP=2813	GT:DP:GQ:EC:SG	1:274:207:274:T	1:355:209:355:T	1:458:211:456:T	1:574:209:574:T	1:512:198:511:T	1:173:153:170:T	1:363:198:363:T	1:104:119:104:T
6701_GGCCGTGTTCAGCTGTATTCAATTCTTTTCTACTC_NODE_1_length_204_cov_52.245098	50	.	A	C	17.14	PASS	NS=7:AN=1:DP=43	GT:DP:GQ:EC:SG	.:0:0:0:N	1:20:57:20:C	1:9:24:9:C	1:3:6:3:C	1:7:18:7:C	1:1:5:1:A	1:2:3:2:C	1:1:7:1:A
5361_GGCCGTTCTGCCTTGCTGAGTCATGGGCTGAGATA_NODE_2_length_338_cov_7.671597	38	.	A	G	48.5	PASS	NS=8:AN=1:DP=76	GT:DP:GQ:EC:SG	0:2:33:0:A	0:11:60:0:A	0:7:48:0:A	0:17:78:0:A	0/1:21:35:2:A	0:2:33:0:A	0/1:9:53:5:R	0:7:48:0:A
7850_GGCCGCCCACCAACTAACACCACCAGCACCACCGC_NODE_5_length_196_cov_15.479591	115	.	C	G	32.14	PASS	NS=7:AN=1:DP=113	GT:DP:GQ:EC:SG	0:24:99:0:C	.:0:0:0:.	0:3:36:0:C	0/1:6:12:1:C	0/1:10:11:2:C	0/1:8:42:4:S	0/1:7:24:1:C	0/1:55:1:9:S
6275_GGCCGGAAAACAGCAGAACAAGCTGTTTGCTTCTC_NODE_2_length_350_cov_8.782857	46	.	G	T	11.83	PASS	NS=6:AN=1:DP=28	GT:DP:GQ:EC:SG	.:0:0:0:.	1:12:33:12:T	1:9:24:9:T	1:3:6:3:T	1:2:3:2:T	1:1:2:1:G	1:1:3:1:G	.:0:0:0:.
7824_GGCCGTCAGCTAGTCCAGGTTCCTCATTTGCAGAT_NODE_2_length_299_cov_9.183947	172	.	A	G	112.38	PASS	NS=8:AN=1:DP=359:AS=TGGCAGAATGGGAACTAGAGCCCAGGTCTCCAGCCTCTTCATGACACCAG[A/G]CTGTCCTCAGCAACAGAGCCCCCAGGCTCTGCTTCATGGGATCACAGGTC	GT:DP:GQ:EC:SG	1:26:78:26:G	0/1:35:67:14:R	0:85:218:0:A	0:74:201:0:A	1:38:111:38:G	0/1:32:73:17:R	0/1:57:88:32:R	0:12:63:0:A
10847_GGCCGCAAAGACCCAGCCCCTTCGGCGTTGCTATG_NODE_2_length_224_cov_10.964286	108	.	G	A	101.88	PASS	NS=8:AN=1:DP=317	GT:DP:GQ:EC:SG	0:25:105:0:G	0/1:57:106:34:R	0/1:51:14:6:G	0:62:214:0:G	1:40:117:40:A	0/1:23:55:8:R	0:43:159:0:G	1:16:45:16:A
5402_GGCCGTTGCTGGGACGCATCTGTTGCTAAGAAAAA_NODE_2_length_272_cov_18.551470	11	.	C	G	28.86	PASS	NS=7:AN=1:DP=28	GT:DP:GQ:EC:SG	.:0:0:0:.	1:2:3:2:G	0:8:51:0:C	1:4:9:4:G	0:1:30:0:C	1:2:3:2:G	0/1:10:76:6:S	0:1:30:0:C
9554_GGCCGCCCTCTTTCCTATCGCCACCAAATGGGCGG_NODE_2_length_280_cov_5.600000	128	.	T	C	42.25	PASS	NS=8:AN=1:DP=119	GT:DP:GQ:EC:SG	1:1:9:1:T	1:35:105:35:C	1:17:54:17:C	1:24:56:23:C	1:18:51:18:C	1:4:9:4:C	1:17:48:17:C	1:3:6:3:C
4732_GGCCGCACCTTCCTCCCGTGGAAGCTGCTCGGCCC_NODE_3_length_177_cov_27.508474	62	.	A	T,G	48.25	PASS	NS=8:AN=2:DP=364	GT:DP:GQ:EC:SG	0/2:28:33:3:A	0/2:22:15:5:R	0/2:32:66:11:R	0/2:97:38:17:A	0:64:120:0:A	0:47:89:0:A	0/1/2:57:6:7,10:R	0/2:17:19:2:A
1104_GGCCGTTCACGAAGGGCAGATATGCCGAGCTCATT_NODE_2_length_223_cov_6.896861	172	.	T	G	65.5	PASS	NS=8:AN=1:DP=993	GT:DP:GQ:EC:SG	0/1:62:46:26:K	0/1:75:117:34:K	0/1:149:131:77:K	0/1:284:19:94:T	0/1:210:56:59:T	0/1:33:48:20:K	0/1:126:52:62:K	0/1:54:55:25:K
9342_GGCCGCTAGGGGCTGCTGCCCCGCTGCTCTGCGGC_NODE_2_length_303_cov_7.848185	261	.	T	A	45.12	PASS	NS=8:AN=1:DP=115:AS=CCCTTCTCACACCTTTCTCCCAAGCCCTAGGCTGTTTCCTCCTTGGCACC[T/A]CCAACCTCCCGACGGCTTTTTACTGCTTATCCCAACGTCCCTTTCGGCAT	GT:DP:GQ:EC:SG	1:4:9:4:A	0/1:3:12:1:T	0/1:10:25:1:T	0:23:96:0:T	1:24:72:24:A	1:14:39:14:A	1:31:93:31:A	1:6:15:6:A
7419_GGCCGGGTGTTTGCATAGAACGTTATCCGCTGAAT_NODE_2_length_176_cov_9.522727	92	.	A	C,G	29	PASS	NS=8:AN=2:DP=330	GT:DP:GQ:EC:SG	0/1/2:8:22:1,1:A	0/2:58:31:20:R	0/2:79:14:21:R	0/2:51:50:7:A	0/2:53:5:11:A	0:15:50:0:A	0/2:54:51:22:R	0/2:12:9:3:A
4612_GGCCGCAGTTTCCTCAGGAAGAAGCAGCCAGGCGC_NODE_2_length_310_cov_4.264516	154	.	T	C	42.38	PASS	NS=8:AN=1:DP=67	GT:DP:GQ:EC:SG	0:7:48:0:T	0:6:45:0:T	0:9:54:0:T	0:19:84:0:T	0:8:51:0:T	1:3:6:3:C	0/1:13:18:2:T	0:2:33:0:T
10540_GGCCGAAGTCAGGCGCGCCCCGCCGGGCTGCTGCT_NODE_2_length_307_cov_5.241042	198	.	C	T	60.57	PASS	NS=7:AN=1:DP=166:AS=GTCGCTCTGCGGTCTTGTACACAAAGGGTGAGAGAGAGGCGTGGGGAGGC[C/T]GGAAGGCGTCTCTGCACCGCTGGGCGAGGCGAAGGCCGCCCAAGTATCCT	GT:DP:GQ:EC:SG	1:18:51:18:T	1:24:69:24:T	1:22:35:21:T	1:45:104:44:T	1:15:42:15:T	1:14:42:14:T	1:28:81:28:T	.:0:0:0:N
423_GGCCGAGAGGCTAGAACTGGAGAGAAGAGCCACCA_NODE_2_length_286_cov_17.566433	116	.	C	T	69.62	PASS	NS=8:AN=1:DP=194	GT:DP:GQ:EC:SG	0:15:72:0:C	0/1:31:55:12:Y	0:51:181:0:C	0:28:111:0:C	0/1:27:65:13:Y	0:9:54:0:C	0/1:27:18:7:Y	0/1:6:1:2:C
3287_GGCCGCCGCTGCTTCGTGGAGGCCGCGGAGGTGGG_NODE_2_length_218_cov_7.513762	24	.	T	G	42.88	PASS	NS=8:AN=1:DP=171	GT:DP:GQ:EC:SG	0/1:14:11:2:T	0:30:87:0:T	0:32:123:0:T	0/1:26:44:7:K	0/1:29:54:9:K	0/1:4:7:1:T	0/1:29:2:5:T	0/1:7:15:1:T
9076_GGCCGGACCTTCCTCCCGTGGAAGCTGCTCGGCCC_NODE_2_length_171_cov_9.625731	150	.	C	A,G	16.25	PASS	NS=8:AN=2:DP=61	GT:DP:GQ:EC:SG	0/1/2:7:10:1,3:S	1:3:6:3:A	1:1:3:1:C	0/1/2:22:40:2,9:S	0/1:4:22:3:M	0/1/2:4:12:1,2:R	0/2:19:35:8:S	1:1:2:1:C
9678_GGCCGAGAAGGTTCCGCGTGGGACTGTAGAGGGAC_NODE_2_length_207_cov_8.661836	186	.	G	T	29	PASS	NS=6:AN=1:DP=39	GT:DP:GQ:EC:SG	0:2:33:0:G	.:0:0:0:.	0/1:2:4:1:G	0/1:11:29:4:K	0:12:63:0:G	.:0:0:0:.	0/1:11:15:4:K	0:1:30:0:G
465_GGCCGCGGGGGCGCTTGGTGCCTCAGGAAAGGGGC_NODE_2_length_314_cov_15.837580	269	.	G	A	65.62	PASS	NS=8:AN=1:DP=136:AS=GATGAGGAAGTATTTATGAGAAGCAAAGAAAGTATTCCTCTAAAGAACGT[G/A]GTACATTTTTTTTTCAAATGGCCAAATATGTAAATACCAACTTTCTCTGC	GT:DP:GQ:EC:SG	0/1:10:54:5:R	0:6:45:0:G	0:24:99:0:G	0:30:117:0:G	1:16:15:15:A	0/1:16:35:5:R	0:23:96:0:G	0/1:11:64:6:R
9179_GGCCGGGTGCCCACCGACCCGAGGCCTGGCCTTTC_NODE_2_length_303_cov_6.759076	42	.	T	G	19	PASS	NS=6:AN=1:DP=44	GT:DP:GQ:EC:SG	.:0:0:0:.	1:9:24:9:G	1:22:63:22:G	1:2:3:2:G	1:5:12:5:G	1:2:3:2:G	1:4:9:4:G	.:0:0:0:.
10450_GGCCGCGAGGCCGAGCTGTGCCCCCCTTCGTTTTC_NODE_2_length_282_cov_4.659575	51	.	T	A	17	PASS	NS=6:AN=1:DP=40:AS=CTACCCAGGTAAGGGTCTTTCTTCACCCAGGCCCACCCCTGCTTTCCCGG[T/A]TACTACCCTCAAAAGTCCAGCCCTATCACTGTGGGAAAAGGGAGGAGCCA	GT:DP:GQ:EC:SG	1:4:9:4:A	1:18:51:18:A	1:5:12:5:A	1:2:3:2:A	1:4:9:4:A	.:0:0:0:.	1:7:18:7:A	.:0:0:0:.
5295_GGCCGCCTCCACTTGCAGAGACTCTGAATGAAATC_NODE_2_length_237_cov_13.755274	114	.	A	G	19.43	PASS	NS=7:AN=1:DP=40:AS=ACTCAGAGCGACCCTATGGGACAGTACAACTGCCCTATAGAGTTTCCGAG[A/G]AGCTTCTGGCGGACTAGGGGTGGATATAGATTGTGTTAGAAGATGGTAAG	GT:DP:GQ:EC:SG	1:2:3:2:G	0:6:45:0:A	0/1:9:35:1:A	0/1:5:5:1:A	0/1:8:9:7:R	0/1:6:20:1:A	0/1:4:19:1:A	.:0:0:0:.
3085_GGCCGGGTAGGTAAGAAGGGAAAGAAGGCGGTGAT_NODE_2_length_349_cov_17.759312	118	.	A	G	81.38	PASS	NS=8:AN=1:DP=157:AS=AATTATCCCATTTTACAAAATAAGAAACTGAGCTTAGAAAAGTTAAATCA[A/G]TTACCCAGCGACGCACAATTAGTGCAGAGAATTCTAACAGTAAACTCTGA	GT:DP:GQ:EC:SG	0:16:75:0:A	0/1:31:84:14:R	0:40:147:0:A	0:26:105:0:A	0:20:87:0:A	0:7:48:0:A	0:11:60:0:A	0:6:45:0:A
8611_GGCCGTCTGTCAAAGTTGCTAGGCAACCTGAGCGC_NODE_2_length_308_cov_10.022727	76	.	A	G	31.5	PASS	NS=8:AN=1:DP=88:AS=GGCAGGGCTTTGGTGGTGGGGAAGTTGTGGGGGTCTCCCACTCTCCCAGT[A/G]CTGCCCTTTAGGACATGGCCCAGACCCCAAGGAGCTCCGAAGCCCCTCCC	GT:DP:GQ:EC:SG	1:4:9:4:G	1:24:72:24:G	1:28:84:28:G	1:9:24:9:G	1:7:24:7:G	1:2:3:2:G	1:12:33:12:G	1:2:3:2:G
145_GGCCGCGCCCCAGGCCACTTGGCTGTGTCCGGTGT_NODE_1_length_290_cov_15.462069	146	.	G	A	124.75	PASS	NS=8:AN=1:DP=335:AS=GGGAGACTTTCTCGCGGTATCGTCTCACCACCCTTTACATACTCAACCGC[G/A]TCAACCACCAAGAAGTACGCAAAGAAAACACTATTGAAGAATGAGTTTTC	GT:DP:GQ:EC:SG	0/1:36:101:18:R	0/1:88:80:33:R	0:44:162:0:G	0:44:165:0:G	0:41:159:0:G	0:26:105:0:G	0:49:178:0:G	0:7:48:0:G
10667_GGCCGTGGCGTGAGTGCTGGAGTCTCCTCCCTGAG_NODE_2_length_257_cov_11.470818	149	.	C	T	93.75	PASS	NS=8:AN=1:DP=200:AS=TCTGTAACATGGGGTAGCTATGAGTCAGAATCCACTCAACAGCAGTGGGT[C/T]TGGTTTCGTGTTGAAATAAACCTGTTGAGAGCCTCCCTTCCTAGCAGGGC	GT:DP:GQ:EC:SG	0/1:10:45:6:Y	0:52:184:0:C	0:24:99:0:C	0:47:168:0:C	0:25:102:0:C	0:5:42:0:C	0/1:32:83:19:Y	0/1:5:27:3:Y
8241_GGCCGCGGGCACGGGCCGTTCTTTTCCAACGAGTT_NODE_2_length_266_cov_7.616541	240	.	G	C	63.38	PASS	NS=8:AN=1:DP=108	GT:DP:GQ:EC:SG	0:14:69:0:G	0/1:5:25:3:S	0/1:6:26:1:G	0:24:99:0:G	0:28:111:0:G	0:2:33:0:G	0:12:66:0:G	0:17:78:0:G
10791_GGCCGAGTGCAGGGCGGATTGGCTGCGTTAAGAAG_NODE_2_length_275_cov_18.712727	132	.	G	C	134.12	PASS	NS=8:AN=1:DP=380	GT:DP:GQ:EC:SG	0:25:102:0:G	0:79:219:0:G	0:40:147:0:G	0/1:54:49:19:S	0:75:214:0:G	0/1:30:59:14:S	0:60:205:0:G	0:17:78:0:G
5599_GGCCGCCGCCTTTGGGGCAGAGACCCACTTATGGG_NODE_2_length_218_cov_9.798165	116	.	A	C	40.25	PASS	NS=8:AN=1:DP=119:AS=AAACCCTATAGGGTTAGTATGAGTTGACAGCAACTTTTTTTTTGTGGCTA[A/C]ACTTGTGTATTTTCTATTGTTTCATCTCCTCCTTGACGTGCACTTATTGT	GT:DP:GQ:EC:SG	1:8:21:8:C	1:9:30:9:C	1:26:62:25:C	1:23:69:23:C	1:18:54:18:C	1:10:33:10:C	1:18:35:17:C	1:7:18:7:C
6569_GGCCGCCATGCGTCTGCGCCGGACTTTCCACGCTC_NODE_2_length_262_cov_9.274809	138	.	C	T	83.38	PASS	NS=8:AN=1:DP=250	GT:DP:GQ:EC:SG	0/1:27:22:6:Y	0:35:132:0:C	0/1:26:61:2:C	0:37:87:0:C	0:41:96:0:C	0/1:24:34:7:Y	0:50:178:0:C	0:10:57:0:C
1859_GGCCGCTACGCTCGGCGGCGTCGGGGGGCGGGGCT_NODE_2_length_196_cov_11.193877	149	.	C	G	50.38	PASS	NS=8:AN=1:DP=85	GT:DP:GQ:EC:SG	0/1:14:80:8:S	0:6:48:0:C	0:15:72:0:C	0:25:102:0:C	0:10:57:0:C	0/1:8:29:1:C	1:5:12:5:G	1:2:3:2:G
3142_GGCCGGTTTAAAGAGCTACTACAACAGGCGCTCTA_NODE_2_length_242_cov_7.652893	34	.	T	C	17.5	PASS	NS=8:AN=1:DP=61	GT:DP:GQ:EC:SG	0:2:33:0:T	0/1:24:1:4:T	0/1:10:17:3:Y	0/1:7:19:1:T	0/1:10:22:3:Y	1:1:2:1:T	0/1:6:16:1:T	0:1:30:0:T
2265_GGCCGGGCTTAGCGGTTCTCGCCTGCAATACTCAC_NODE_2_length_235_cov_10.676596	108	.	G	C	158	PASS	NS=8:AN=1:DP=438:AS=GGCTTGAGGTACCTGCAGGCGTCACCAACAGAGCAGGGATCCTCGGTTCC[G/C]TGTTTGCCTTTCCAACGTGCAAGGACGATTCTCTTTCTCCTACCCACACC	GT:DP:GQ:EC:SG	0:25:105:0:G	0:73:205:0:G	0:80:215:0:G	0:89:227:0:G	0:42:156:0:G	0/1:33:73:15:S	0:83:217:0:G	0:13:66:0:G
5593_GGCCGGGAGAGCGGGGGACAGAGCAGCCTCGGAGG_NODE_2_length_250_cov_18.208000	204	.	A	G	79.62	PASS	NS=8:AN=1:DP=257:AS=AATTCAGTAAAAGAATTCAATTAAAAAATTCACAACTCTTAAAAAACTGC[A/G]ACTCGACAAAAATGTGGAAGCTCCTACGAATACTGTTCCTACCTTTAAAA	GT:DP:GQ:EC:SG	1:20:57:20:G	0/1:35:75:14:R	1:44:125:44:G	0:40:147:0:A	0/1:37:61:12:R	1:22:63:22:G	0/1:53:94:29:R	1:6:15:6:G
8071_GGCCGACTCCAGCTGTTCCGGATGCGGGGCGGGGG_NODE_2_length_155_cov_10.090322	95	.	C	T	78.5	PASS	NS=8:AN=1:DP=189:AS=AGTGCTTCAGGGAAATGAAAGACACAGGTAGGGATTCAAACAACCCTAAA[C/T]ACTCATAGGCTCACATACGTTTACACAAAGATACACATGGAGAACGACAC	GT:DP:GQ:EC:SG	1:26:75:26:T	0/1:23:63:16:Y	0:23:96:0:C	0:41:153:0:C	1:24:69:24:T	0/1:7:39:4:Y	0/1:37:82:16:Y	0:8:51:0:C
1333_GGCCGCGTCTGCTTCCCAGGCGTGGGGACCCACCG_NODE_2_length_187_cov_7.887701	171	.	C	T	39	PASS	NS=8:AN=1:DP=41	GT:DP:GQ:EC:SG	0:4:39:0:C	1:3:6:3:T	0:3:36:0:C	0:15:75:0:C	0:1:30:0:C	0:2:33:0:C	0:12:63:0:C	0:1:30:0:C
3142_GGCCGGTTTAAAGAGCTACTACAACAGGCGCTCTA_NODE_2_length_242_cov_7.652893	73	.	A	G	73	PASS	NS=8:AN=1:DP=223	GT:DP:GQ:EC:SG	0:10:57:0:A	0/1:62:64:19:R	0:39:144:0:A	0:40:111:0:A	0:26:76:0:A	0/1:11:24:3:R	0/1:31:103:16:R	0/1:4:5:1:A
7481_GGCCGCAGGGCTCAGATGTGTGCGTCTCGGCGGCG_NODE_2_length_287_cov_16.397213	82	.	A	T	39.38	PASS	NS=8:AN=1:DP=122:AS=AAATTCATAGTTTGAAATTCTGATCCTTAACAGCAATGGTATGTTAACAA[A/T]ACGGGGTCTTTGTAGCCAGGCTGGCTTATGTCCTAATAGTCGAGTTAACG	GT:DP:GQ:EC:SG	1:3:9:3:T	1:33:96:33:T	1:19:54:19:T	1:14:6:13:T	1:20:60:20:T	1:7:18:7:T	1:21:60:21:T	1:5:12:5:T
329_GGCCGGTTTAAAGAGCTACTACAACAGGGGCTCTA_NODE_11_length_141_cov_4.758865	77	.	C	T	23.5	PASS	NS=6:AN=1:DP=81	GT:DP:GQ:EC:SG	.:0:0:0:.	0/1:46:60:37:Y	1:18:33:17:T	0/1:7:27:3:Y	1:3:6:3:T	1:3:6:3:T	1:4:9:4:T	.:0:0:0:.
782_GGCCGAGTGGAACCAGTGAACAAATGCCCAAGGGT_NODE_2_length_273_cov_18.252747	139	.	T	C,G	118.25	PASS	NS=8:AN=2:DP=270:AS=ACACCTGTCCCTGCTTATGGTCATCTCCACCTTCGCGGAGGTCTGAAAGG[T/C,G]CATTCAGCCGAAACTAGCTTTTCCACCTTCCCCTTTCTTTAACGTGGTAT	GT:DP:GQ:EC:SG	0:25:102:0:T	0:27:120:0:T	0:57:191:0:T	0:45:171:0:T	0/1:37:74:22:Y	0:22:96:0:T	0:48:153:0:T	0/2:9:39:1:T
4511_GGCCGGGTATTTGCATAGAACGTTATCCGCGGAAT_NODE_6_length_134_cov_4.917911	56	.	A	T,C,G	35.25	PASS	NS=8:AN=3:DP=364:AS=GAGCCAATGGCAGAGATCCGGCCCGCCAGGCAGATGACACAGGGCCCTCC[A/T,C,G]TTGTGACCTATGACGCCTAGTGGCCACAGGATTTGAGCACACCCTGGGAA	GT:DP:GQ:EC:SG	0:2:33:0:A	0/2:168:65:69:M	0/2:126:39:43:M	0/2:30:40:3:A	0/2/3:7:13:1,1:A	0/2:10:29:1:A	0/1/2:20:33:3,6:M	0:1:30:0:A
9430_GGCCGGGTTGTGGTTAAGGGTTTTTCTTTGAAGAA_NODE_2_length_319_cov_18.100313	169	.	G	C	150.25	PASS	NS=8:AN=1:DP=363:AS=AGACCACGAAGAAGGAAGGCTCAAATCCATCATATTCGGGGTGGGTAAAT[G/C]CAAGTCATTTCGCTATAAAGTGGAGAAAATAATCCCTCTCTTGGCTCAAC	GT:DP:GQ:EC:SG	0/1:31:70:11:S	0:39:144:0:G	0:64:211:0:G	0:57:199:0:G	0:63:210:0:G	0/1:33:85:15:S	0:55:193:0:G	0:21:90:0:G
3908_GGCCGGAGCGTTGGACTTTCCCAGTCGGCTCGACC_NODE_2_length_253_cov_6.865613	32	.	T	C	67.86	PASS	NS=7:AN=1:DP=113	GT:DP:GQ:EC:SG	0:7:48:0:T	0/1:31:93:18:Y	0:11:60:0:T	0:18:81:0:T	0/1:18:85:12:Y	0/1:8:19:3:Y	0/1:20:89:11:Y	.:0:0:0:N
8793_GGCCGCTTCGCGGTGCAGCGGCTTCACCTGGAGCG_NODE_2_length_302_cov_21.705297	232	.	C	G	111.38	PASS	NS=8:AN=1:DP=596:AS=TTACATGGTTATAAGCCACAAAACAGGCTTGGACCGACTGGTCAACTGCT[C/G]GAGACAAGCTTCTCTTTTTCCTCCTTTTCTCCCCTCATATCCTGCCAGGC	GT:DP:GQ:EC:SG	0/1:99:58:36:S	0:30:117:0:C	0/1:61:22:15:S	0:96:218:0:C	0/1:87:57:31:S	0:62:202:0:C	0/1:123:73:51:S	0:38:144:0:C
9399_GGCCGGGGGTGGAAGTCTCCCTGGGGCCAGCAGTG_NODE_2_length_152_cov_7.368421	149	.	A	G	7.29	q10	NS=7:AN=1:DP=14	GT:DP:GQ:EC:SG	1:1:1:1:A	1:1:12:1:A	.:0:0:0:.	0/1:4:16:3:R	1:4:9:4:G	1:1:2:1:A	1:2:3:2:G	1:1:8:1:A
4732_GGCCGCACCTTCCTCCCGTGGAAGCTGCTCGGCCC_NODE_3_length_177_cov_27.508474	172	.	C	G	30.75	PASS	NS=8:AN=1:DP=47	GT:DP:GQ:EC:SG	0/1:12:27:5:S	0:1:30:0:C	1:2:3:2:G	0/1:12:44:1:C	0:3:36:0:C	0:3:36:0:C	0:6:45:0:C	0/1:8:25:1:C
6324_GGCCGCTCCGGAAGTGGCGCGGGGATTGTGGAAAG_NODE_2_length_169_cov_12.792899	52	.	C	T	26.71	PASS	NS=7:AN=1:DP=126:AS=TGTGACCGAATTAACGTACTAACTTAAGTTGAATGTGAAGTCCACCCTTT[C/T]CTTTCAAAAGCCCTGGGGGAGTCTTAACTTGCTTGTGGGTTTGACAGTGA	GT:DP:GQ:EC:SG	.:0:0:0:.	0/1:55:24:19:Y	0/1:26:22:9:Y	0/1:23:39:3:C	0:9:54:0:C	0/1:3:9:1:C	0/1:9:31:5:Y	1:1:8:1:C
2286_GGCCGGCTAAGCTGCACGACACGGCAGAGAAGGCT_NODE_2_length_252_cov_14.757936	59	.	C	T	26.29	PASS	NS=7:AN=1:DP=78:AS=ACATAGGGTCGCCATGAGTAGGCATGACAGACTTGGCAACTGGTTTGTTG[C/T]TGCTGTTTTAATTACAGAAAAAAACACACTAACAAGAAATAACTTTAGTG	GT:DP:GQ:EC:SG	.:0:0:0:.	0/1:17:7:3:C	1:22:66:22:T	0/1:13:44:5:Y	1:8:21:8:T	1:3:6:3:T	1:12:33:12:T	0/1:3:7:2:Y
6857_GGCCGCCGGGTTTCCCCCCGGGGCGGGCCGCCGGC_NODE_2_length_315_cov_8.780952	110	.	T	C	43	PASS	NS=8:AN=1:DP=124:AS=CAGTGACCCTTCAACCAGCTCCTGTGCCCCTCTGCCTTTGCATCTCGCCT[T/C]CAGACAGAAGCTGCCCACGTAGTCTCATGCGTCTACTTGAGCTAAGAAGC	GT:DP:GQ:EC:SG	0:6:45:0:T	0/1:33:52:12:Y	1:29:84:29:C	0/1:24:68:13:Y	1:13:39:13:C	0/1:3:11:2:Y	1:13:36:13:C	0/1:3:9:1:T
4134_GGCCGTGTAAGACATAGCTATCAGTCTCTAATCAT_NODE_2_length_328_cov_11.045732	128	.	A	G	38.29	PASS	NS=7:AN=1:DP=63	GT:DP:GQ:EC:SG	0:7:48:0:A	1:16:19:15:G	1:17:51:17:G	0/1:4:12:1:A	0:3:36:0:A	0:6:45:0:A	0:10:57:0:A	.:0:0:0:N
10950_GGCCGTTTTGAGCGGCTTGCTTTTTCTCCTGGTAG_NODE_4_length_170_cov_8.323529	90	.	C	A	42.29	PASS	NS=7:AN=1:DP=51	GT:DP:GQ:EC:SG	0:4:39:0:C	0/1:12:36:1:C	0/1:10:60:5:M	0:20:87:0:C	.:0:0:0:.	0:3:36:0:C	1:1:8:1:C	0:1:30:0:C
6129_GGCCGGCGGCCACAGAGTGGCTGAGGCGCCGATTC_NODE_2_length_200_cov_8.005000	123	.	C	T	60.88	PASS	NS=8:AN=1:DP=170	GT:DP:GQ:EC:SG	0/1:11:3:3:Y	0/1:11:3:9:Y	0/1:22:54:11:Y	0:47:148:0:C	0:21:66:0:C	0:18:57:0:C	0:29:96:0:C	0:11:60:0:C
1574_GGCCGTGGTGACGCTCCCAACGATGACGTTAAGGC_NODE_2_length_319_cov_13.445141	90	.	A	G	55.75	PASS	NS=8:AN=1:DP=103	GT:DP:GQ:EC:SG	0:12:63:0:A	0/1:31:84:11:R	0/1:25:96:12:R	0/1:12:53:5:R	0/1:5:38:3:R	0:2:33:0:A	0:12:63:0:A	0/1:4:16:1:A
10791_GGCCGAGTGCAGGGCGGATTGGCTGCGTTAAGAAG_NODE_2_length_275_cov_18.712727	248	.	G	A	39.5	PASS	NS=8:AN=1:DP=125	GT:DP:GQ:EC:SG	1:17:48:17:A	1:1:1:1:G	1:13:39:13:A	0/1:40:81:20:R	1:18:51:18:A	0/1:7:15:3:R	1:8:21:8:A	1:21:60:21:A
4962_GGCCGAGTGCCATGGGCAGAAACATTGACACATAC_NODE_3_length_173_cov_4.890173	47	.	G	C	70.83	PASS	NS=6:AN=1:DP=218	GT:DP:GQ:EC:SG	.:0:0:0:.	0/1:93:111:47:S	0/1:64:103:40:S	0/1:14:32:4:S	0/1:16:25:4:S	0/1:12:60:5:S	0/1:19:94:12:S	.:0:0:0:.
4877_GGCCGTATCCTCCCCCGGCAGACAGCCCACCCCGG_NODE_2_length_245_cov_10.322449	139	.	G	A	74.38	PASS	NS=8:AN=1:DP=222	GT:DP:GQ:EC:SG	0/1:11:35:5:R	1:21:63:21:A	1:58:115:58:A	0:35:135:0:G	1:43:110:43:A	1:7:18:7:A	1:43:110:43:A	1:4:9:4:A
4799_GGCCGAGCCTCAGTGGGAGGAAGCACTGTGTTCTG_NODE_2_length_345_cov_11.962318	58	.	A	C	24.29	PASS	NS=7:AN=1:DP=55	GT:DP:GQ:EC:SG	.:0:0:0:N	1:8:21:8:C	0/1:19:76:9:M	0/1:5:12:1:A	1:11:30:11:C	1:5:12:5:C	1:6:18:6:C	1:1:1:1:A
3001_GGCCGTCTTTGCTCTTTAACACTTAAAGAGGTCTT_NODE_2_length_289_cov_16.740484	221	.	T	C	102.62	PASS	NS=8:AN=1:DP=217	GT:DP:GQ:EC:SG	0:18:81:0:T	0/1:30:123:11:Y	0:19:84:0:T	0:50:144:0:T	0:30:117:0:T	0:22:93:0:T	0:36:135:0:T	0/1:12:44:5:Y
54_GGCCGCAGGTGCGCTCAGAGCAGGCGGTGCTGATT_NODE_2_length_233_cov_4.467811	112	.	G	T	26	PASS	NS=8:AN=1:DP=65:AS=GGTCTCTTTGAAGCCCTCGGGCTCCCGGATTAGAGTTAGATTTCACTCAG[G/T]ACAGTGTAAATTCAAGTTAGGAGCCGATGATCTGAGTTAGGGTCAGGGTC	GT:DP:GQ:EC:SG	1:4:9:4:T	1:13:36:13:T	1:10:27:10:T	0:15:72:0:G	1:7:18:7:T	1:5:15:5:T	1:10:30:10:T	1:1:1:1:G
2949_GGCCGTGCCCAAGGTCTGTTTGGCACACAGCTTAC_NODE_2_length_328_cov_8.862804	81	.	C	T	13.83	PASS	NS=6:AN=1:DP=36:AS=ATATGTAGCTAATGGCTAACATATTAGACATTTCAGATACAGACAGATAC[C/T]AGATTGGGTGAAAATTCAAAAAACTTAAACTTTTTTGAAAAGATTCACTC	GT:DP:GQ:EC:SG	.:0:0:0:N	0/1:9:1:2:Y	0/1:16:57:7:Y	0/1:5:13:1:C	0/1:3:6:1:C	1:1:3:1:C	1:2:3:2:T	.:0:0:0:.
7150_GGCCGGGCTGGTCCAGGAAGTCCCTCCGACCACCG_NODE_2_length_318_cov_5.424528	208	.	A	G	66.75	PASS	NS=8:AN=1:DP=337	GT:DP:GQ:EC:SG	0/1:29:0:5:A	0:37:93:0:A	0/1:47:30:11:R	0:68:175:0:A	0/1:60:132:5:A	0/1:29:34:4:A	0/1:56:10:12:R	0:11:60:0:A
9963_GGCCGTTTTGAATTGGACAATCATATAGTCCACTA_NODE_2_length_146_cov_6.513699	89	.	G	A	33	PASS	NS=7:AN=1:DP=40	GT:DP:GQ:EC:SG	0:3:36:0:G	0:8:51:0:G	0:3:36:0:G	0/1:11:40:1:G	.:0:0:0:.	1:1:4:1:G	0/1:11:28:4:R	0:3:36:0:G
437_GGCCGTTCGCTTCCACGCGGCTGGAGGCTGCCCCC_NODE_2_length_223_cov_10.681614	67	.	G	T	75.12	PASS	NS=8:AN=1:DP=196:AS=GTTAAGAAGAGCTTTTGGGGTGGATATTGGTAGCCCTTGCTGCCGTCTAG[G/T]GAGGGAAACAGCAATGAAAGTAGAGAAGCTTGCCTTTCTGCGGTTTCCCT	GT:DP:GQ:EC:SG	0:19:84:0:G	0/1:32:81:17:K	1:54:111:54:T	0:33:129:0:G	0:22:93:0:G	1:13:36:13:T	1:22:63:22:T	1:1:4:1:G
8683_GGCCGGTACTCAGGAAATGTTTGGAGAAGTGAATC_NODE_3_length_168_cov_9.952381	128	.	C	T	41.88	PASS	NS=8:AN=1:DP=131	GT:DP:GQ:EC:SG	0/1:13:56:7:Y	0/1:37:36:11:Y	0:18:81:0:C	0/1:12:40:1:C	0/1:13:41:1:C	0/1:12:20:4:Y	0/1:24:28:7:Y	0:2:33:0:C
3972_GGCCGGGTTGGAAGTTATCAGAGGTGTCTGTTTCA_NODE_2_length_198_cov_14.696970	87	.	A	G	137.75	PASS	NS=8:AN=1:DP=381	GT:DP:GQ:EC:SG	0:29:114:0:A	0:58:202:0:A	0/1:69:87:31:R	0:64:216:0:A	0:78:219:0:A	0:13:69:0:A	1:52:127:52:G	0/1:18:68:9:R
2256_GGCCGGCCATCGTGTTTATTCCAAAGCCTCTGAAC_NODE_2_length_310_cov_7.909678	90	.	A	G	21.86	PASS	NS=7:AN=1:DP=58:AS=GGGGTGCAGAAGGTTAAGTGCTCAGTTCCTAGCTGAAAGGTTGACCATTC[A/G]AACCCACCTGGAGGCGCCTCAGAAGAAGGGCCTGGTGGTCTGCTTCCGAA	GT:DP:GQ:EC:SG	.:0:0:0:.	1:16:45:16:G	1:7:18:7:G	1:14:39:14:G	1:6:15:6:G	1:2:3:2:G	1:11:30:11:G	1:2:3:2:G
6324_GGCCGCTCCGGAAGTGGCGCGGGGATTGTGGAAAG_NODE_2_length_169_cov_12.792899	130	.	T	C	34.75	PASS	NS=8:AN=1:DP=129	GT:DP:GQ:EC:SG	0/1:18:8:16:Y	0/1:38:105:23:Y	0/1:29:76:21:Y	0/1:15:13:12:Y	0/1:13:7:12:C	0/1:3:9:2:Y	0/1:11:58:7:Y	0/1:2:2:1:T
9977_GGCCGCTGGGGTGCGCTGGGAGGCGAGGCGGCTCC_NODE_2_length_188_cov_8.670213	149	.	T	C	48	PASS	NS=8:AN=1:DP=277	GT:DP:GQ:EC:SG	0/1:27:55:10:Y	0/1:29:15:7:Y	0/1:61:33:18:Y	0/1:56:76:30:Y	0/1:31:33:9:Y	0/1:14:63:9:Y	0/1:56:73:26:Y	0:3:36:0:T
80_GGCCGGGCAGCTGGGCTCTAAATCCAGACCTCGCC_NODE_2_length_218_cov_5.275229	46	.	T	G	55.43	PASS	NS=7:AN=1:DP=142	GT:DP:GQ:EC:SG	1:16:45:16:G	1:19:54:19:G	1:34:102:34:G	1:19:31:18:G	1:22:66:22:G	1:10:27:10:G	1:22:63:22:G	.:0:0:0:.
9831_GGCCGGAACGCAGAGGGGCGCGGCTGGATCGGCTT_NODE_2_length_209_cov_11.267942	11	.	T	A	33.43	PASS	NS=7:AN=1:DP=25	GT:DP:GQ:EC:SG	0:1:30:0:T	1:3:6:3:A	0:1:30:0:T	0:10:57:0:T	.:0:0:0:.	0:1:30:0:T	0:8:51:0:T	0:1:30:0:T
8977_GGCCGAGAAGGTCCCGCGTGGGACTGTAGAGGGAC_NODE_1_length_227_cov_23.440529	154	.	C	G	42.5	PASS	NS=8:AN=1:DP=138	GT:DP:GQ:EC:SG	0/1:2:4:1:C	0/1:11:34:4:S	0/1:27:64:16:S	0/1:31:85:18:S	0/1:22:71:14:S	0/1:10:28:7:S	0/1:31:45:22:S	1:4:9:4:G
1264_GGCCGCCGGATCAGACCAGCAGCTACTCACGCTGG_NODE_2_length_299_cov_10.795986	60	.	A	G	38.29	PASS	NS=7:AN=1:DP=50	GT:DP:GQ:EC:SG	0/1:2:8:1:A	0:7:48:0:A	0:11:60:0:A	0:10:57:0:A	0/1:7:27:4:R	0/1:5:17:4:R	0:8:51:0:A	.:0:0:0:.
9944_GGCCGCCAAGAGGAGGCTCCTTAAGGAGCGGATCT_NODE_2_length_246_cov_7.756098	101	.	C	T	86	PASS	NS=8:AN=1:DP=379	GT:DP:GQ:EC:SG	0:16:75:0:C	0:78:194:0:C	0/1:80:87:9:C	0/1:76:75:9:C	0:45:140:0:C	0/1:11:39:1:C	0/1:55:47:7:C	0/1:18:31:5:Y
6981_GGCCGCTATGTCAATCCATCTCCTTTGAAGGTCTT_NODE_1_length_314_cov_33.000000	115	.	C	T	78.25	PASS	NS=8:AN=1:DP=261:AS=TCCACAATCAACACCCAAGGAAGCAGCAGTCAAGAAATCAAATGATGTAT[C/T]GCATCGGGCAAATCTGCTGCAAAAGACCTCTTTAAAGTGTTAAAAAAGCA	GT:DP:GQ:EC:SG	0/1:9:22:3:Y	1:54:126:53:T	1:49:122:49:T	0/1:52:89:24:Y	0/1:32:81:14:Y	1:22:63:22:T	1:34:99:34:T	1:9:24:9:T
974_GGCCGGGACTACCGCGGAGCGACGGCAAGGAACCT_NODE_2_length_248_cov_9.596774	81	.	A	C	37.29	PASS	NS=7:AN=1:DP=92:AS=GGTACAATCCTGGAGGGACATAATGAGGCAACCGTGGTGCTCACTCAGCA[A/C]CGAGTCTGTGCCATGCCTGTGCCAGTTTTGCACGCTGATCTCATTTACTC	GT:DP:GQ:EC:SG	1:3:6:3:C	1:30:87:30:C	1:30:90:30:C	1:7:18:7:C	1:6:15:6:C	1:6:15:6:C	1:10:30:10:C	.:0:16:0:A
581_GGCCGGAAGCAAGGGACAGCTGTGCAAATGGCTCA_NODE_2_length_331_cov_8.462235	241	.	C	A	111.88	PASS	NS=8:AN=1:DP=256:AS=ATCTCGGAAATTGGAACCATGTTCCCATCTTGTGAGAAGTAGCCGAGCGC[C/A]TGGCCCCTAGCTAGGTAGGGAATCTCGAATAGTTACACTGACCCACACAG	GT:DP:GQ:EC:SG	1:14:39:14:A	0:24:99:0:C	0:48:171:0:C	0:46:165:0:C	0:39:144:0:C	0:19:84:0:C	1:52:124:52:A	0:14:69:0:C
7069_GGCCGCAGGGCGGATGGGAGGACTTCGATCCTGCC_NODE_2_length_202_cov_5.425743	118	.	C	T	71.12	PASS	NS=8:AN=1:DP=169:AS=TTACAAGGTGCGAACAGACTTTATGGGGGAGGCGACAGACTTGCCAGCTC[C/T]AGGGCCCGGGCGTCTGGAAGACGGCGCAGTAGGAATCCTAGGCTCAGGAC	GT:DP:GQ:EC:SG	0/1:13:71:8:Y	1:25:72:25:T	1:23:69:23:T	0:39:147:0:C	0/1:28:73:13:Y	0/1:14:55:7:Y	1:26:75:26:T	1:1:7:1:C
3287_GGCCGCCGCTGCTTCGTGGAGGCCGCGGAGGTGGG_NODE_2_length_218_cov_7.513762	174	.	G	T	65.38	PASS	NS=8:AN=1:DP=229	GT:DP:GQ:EC:SG	0/1:22:26:5:K	0/1:15:74:10:K	0/1:27:97:13:K	0/1:44:107:23:K	0/1:38:79:14:K	0/1:22:37:7:K	0/1:49:43:13:K	0/1:12:60:6:K
7855_GGCCGGTTTCAGGGCTGGTTCGGATTTGGGAAGGA_NODE_2_length_200_cov_11.985000	11	.	C	T	7.5	q10	NS=8:AN=1:DP=17	GT:DP:GQ:EC:SG	1:1:11:1:C	1:3:6:3:T	1:4:9:4:T	1:2:3:2:T	1:1:10:1:C	1:1:11:1:C	1:4:9:4:T	1:1:1:1:C
6721_GGCCGAGGTCGGTATCGCAGCCTTAGCGGAGCAGG_NODE_2_length_157_cov_7.388535	14	.	G	A	24.43	PASS	NS=7:AN=1:DP=62	GT:DP:GQ:EC:SG	0/1:4:23:3:R	0/1:5:17:1:G	0:5:42:0:G	0/1:20:18:5:R	0/1:17:33:2:G	0:2:33:0:G	0/1:9:5:2:G	.:0:0:0:.
10530_GGCCGGGAGTAGCTCAGAGAAGCAGCCCGTTCCCT_NODE_2_length_180_cov_7.338889	38	.	A	G	54	PASS	NS=8:AN=1:DP=91	GT:DP:GQ:EC:SG	0:4:42:0:A	0:6:48:0:A	0:35:132:0:A	0:15:72:0:A	0:7:48:0:A	1:8:21:8:G	0/1:13:33:1:A	0:3:36:0:A
11102_GGCCGAGGGGCTCGCAGCCTCGGCTTTTGCGTGCG_NODE_2_length_243_cov_26.094650	39	.	C	T	68.62	PASS	NS=8:AN=1:DP=108	GT:DP:GQ:EC:SG	0:6:45:0:C	0:34:129:0:C	0:17:78:0:C	0:16:75:0:C	0/1:14:78:8:Y	0:4:39:0:C	0:13:66:0:C	0:4:39:0:C
9602_GGCCGCACATTTCCCGTGACGCGCCGTTATGTCAC_NODE_2_length_229_cov_5.371179	34	.	T	G	38.62	PASS	NS=8:AN=1:DP=92	GT:DP:GQ:EC:SG	0/1:11:22:3:K	0/1:31:67:11:K	0:27:108:0:T	0:4:39:0:T	0/1:6:9:2:K	0:6:45:0:T	1:6:18:6:G	1:1:1:1:T
9408_GGCCGCTGAGGACTCTCTTTGTCCCCCGAGGCTGT_NODE_2_length_151_cov_22.337748	147	.	A	C	6	q10	NS=6:AN=1:DP=12	GT:DP:GQ:EC:SG	1:1:3:1:A	.:0:0:0:N	1:4:9:4:C	1:3:6:3:C	.:0:0:0:.	1:1:3:1:A	1:1:12:1:A	1:2:3:2:C
4997_GGCCGCGCCGCCGCGCCCCCAAGTCGGGTGCACTC_NODE_2_length_271_cov_7.789668	254	.	A	G	37.25	PASS	NS=8:AN=1:DP=53	GT:DP:GQ:EC:SG	0:14:69:0:A	0/1:3:10:1:A	0:4:39:0:A	0:17:78:0:A	0/1:9:32:6:R	0:1:30:0:A	0/1:3:7:2:R	0:2:33:0:A
494_GGCCGTCATCTGGTCTTGCCAGGCGAAGCAGAGGA_NODE_2_length_325_cov_13.326154	90	.	C	T	70.12	PASS	NS=8:AN=1:DP=238:AS=TAGATCTTAAACACTGTGCCACCAGGGTTTCCTAGTGACTGATAGACAGC[C/T]TAAAGTGTTAACTTGTCCCAGGGAAAATGGCATTTGTAGGATTAAGAGAC	GT:DP:GQ:EC:SG	0:5:42:0:C	0/1:79:62:38:Y	0/1:52:68:30:Y	0:30:117:0:C	0/1:17:64:12:Y	0:14:69:0:C	1:37:100:37:T	0:4:39:0:C
8935_GGCCGCGCGGCTCGTCGCCTTGACGACAGAGACAA_NODE_2_length_191_cov_8.068063	12	.	C	T	24.83	PASS	NS=6:AN=1:DP=44	GT:DP:GQ:EC:SG	0/1:2:7:1:C	0:11:60:0:C	0/1:17:37:7:Y	0/1:7:22:1:C	0/1:4:15:3:Y	.:0:0:0:N	0/1:3:8:2:Y	.:0:0:0:.
2424_GGCCGTGTAGATTAGGGGACCTTTGCAGGTGGGGG_NODE_2_length_282_cov_15.581560	34	.	A	T	33.5	PASS	NS=8:AN=1:DP=96	GT:DP:GQ:EC:SG	1:1:4:1:A	1:34:99:34:T	1:22:63:22:T	1:8:21:8:T	1:9:24:9:T	1:7:18:7:T	1:13:36:13:T	1:2:3:2:T
7799_GGCCGAGAGAAAGGACAGACCACCTTCCAGGAACC_NODE_5_length_195_cov_6.753846	100	.	C	G	34.38	PASS	NS=8:AN=1:DP=51:AS=TAACATGGCATAGCTGTTAGATATCCACATGGAGATGTCAGGTAATAATA[C/G]TAACAGCTAACACTTACTGAGTACATGCACTGGTGCCAGGATTCTTGTAA	GT:DP:GQ:EC:SG	0:2:33:0:C	0/1:16:12:3:S	0:6:48:0:C	0:11:60:0:C	0/1:6:16:2:S	0:1:30:0:C	0/1:8:46:4:S	0:1:30:0:C
3351_GGCCGGTACTCAGGAAATGTTTGGACAAGTGAACC_NODE_2_length_194_cov_7.463918	108	.	C	T	27.25	PASS	NS=8:AN=1:DP=138	GT:DP:GQ:EC:SG	0/1:3:17:1:C	0/1:11:33:7:Y	0/1:6:7:5:Y	0/1:32:44:17:Y	0/1:41:49:24:Y	0/1:7:13:6:Y	0/1:31:44:23:Y	0/1:7:11:6:Y
3634_GGCCGCCCTCTCGTGGCCAGTGGGGAGGAGCGCAA_NODE_2_length_280_cov_12.817857	138	.	G	A	66.25	PASS	NS=8:AN=1:DP=152	GT:DP:GQ:EC:SG	0/1:7:15:1:G	0/1:6:16:5:R	0:23:66:0:G	0:66:207:0:G	0:26:73:0:G	0:6:45:0:G	0:16:75:0:G	0:2:33:0:G
6862_GGCCGCACGCTCTGCTCCTGCAGCCCCTTGGACTG_NODE_2_length_306_cov_4.869281	202	.	C	T	72.75	PASS	NS=8:AN=1:DP=216:AS=CTTGCGCTGAGCGCCTAGAAGCACACGTGGGACTGGAAGGCGCTGCAACT[C/T]CACGGAGGTTGGGCTTGCATGAGAAAAGGTCCTGCAGAGAAGCTCCGGTC	GT:DP:GQ:EC:SG	0/1:14:52:7:Y	0/1:26:57:19:Y	0/1:37:5:9:Y	0:64:203:0:C	0/1:28:78:19:Y	0/1:17:40:7:Y	0:26:108:0:C	0:4:39:0:C
10652_GGCCGGGATTCCTCCAGTCTCAGTCAGACCATTAA_NODE_4_length_167_cov_6.155689	98	.	C	G	56.88	PASS	NS=8:AN=1:DP=170	GT:DP:GQ:EC:SG	0:34:80:0:C	0:9:54:0:C	0:16:75:0:C	0/1:25:50:2:C	0:27:62:0:C	0:14:69:0:C	0/1:12:27:4:S	0/1:33:38:3:C
7085_GGCCGAGAGCCCCCACGCCCTTTTCAGGAGCCTCG_NODE_2_length_388_cov_8.185567	191	.	T	A	48.75	PASS	NS=8:AN=1:DP=136:AS=CTGTGCTGGATGACGAGGGCGGCGGAGGGAGAGCAGGGACCCAGCGATGC[T/A]CCGCAGAAGCAGACACTTGACGACAAACTCTCTCTTCAGCCCCGGGTCCT	GT:DP:GQ:EC:SG	1:6:18:6:A	1:24:69:24:A	1:8:21:8:A	1:19:54:19:A	1:37:111:37:A	1:7:18:7:A	1:31:90:31:A	1:4:9:4:A
3252_GGCCGCCGGCTCCTAAGTCCCTGGGGGCTCTGCTG_NODE_2_length_376_cov_13.074468	344	.	G	C	84.88	PASS	NS=8:AN=1:DP=662	GT:DP:GQ:EC:SG	0/1:135:86:61:S	0/1:10:13:3:S	0:62:151:0:G	0/1:131:118:19:G	0/1:71:81:8:G	0/1:33:64:3:G	0/1:98:89:13:G	0/1:122:77:51:S
465_GGCCGCGGGGGCGCTTGGTGCCTCAGGAAAGGGGC_NODE_2_length_314_cov_15.837580	140	.	T	C	79.88	PASS	NS=8:AN=1:DP=194:AS=CCTCAGCACTTGGAGAGGTCAGGCTGGGTTAGCGCACTCTGCATCCCGCT[T/C]CTAGGGAAAGAGACGTGATATGCAAGAGACGACAAACCATGAAACAGAAG	GT:DP:GQ:EC:SG	0/1:12:19:4:Y	0:37:138:0:T	0:43:156:0:T	0:32:123:0:T	0/1:27:74:15:Y	0/1:15:30:6:Y	0:22:96:0:T	0/1:6:3:2:Y
523_GGCCGCCAAAATCGGTCAAACACGCCAGCACAGCC_NODE_2_length_238_cov_14.340336	179	.	T	C	84.38	PASS	NS=8:AN=1:DP=205:AS=AGACCCGCTCAGGGTAAAAAGTCCCTTAAAATGTGTACCGTCTGGACTAT[T/C]CCTGGCTGCTGGCTGACTCGGTGTGGCACTGGGGTTGGGACAAGCAGCGT	GT:DP:GQ:EC:SG	0:30:93:0:T	0:8:51:0:T	0:16:75:0:T	0:42:153:0:T	0/1:38:57:18:Y	0:16:75:0:T	0:41:150:0:T	0/1:14:21:5:Y
9744_GGCCGGGTGGTGATGACGGGCATCACGAAAGGCTG_NODE_2_length_280_cov_12.342857	129	.	T	A	37.38	PASS	NS=8:AN=1:DP=140:AS=ACCGTGACTTCTATTTCCTGTTATGTTTCTGTTACTATTATCATTGTTAT[T/A]ACTACATGTGGCAGCATGGTCAGACTGCCCACCCCTGCTTCTTCTCTGTG	GT:DP:GQ:EC:SG	1:2:3:2:A	0/1:29:71:17:W	1:24:69:24:A	0/1:31:51:12:W	1:12:33:12:A	1:7:18:7:A	0/1:31:45:11:W	1:4:9:4:A
2702_GGCCGACCCTTTGGTTAGCAGCTGTCGCACTTAAC_NODE_2_length_176_cov_8.130682	46	.	A	G	12.43	PASS	NS=7:AN=1:DP=36	GT:DP:GQ:EC:SG	.:0:0:0:.	1:3:6:3:G	1:4:9:4:G	1:2:3:2:G	1:4:9:4:G	1:2:3:2:G	1:18:51:18:G	1:3:6:3:G
5768_GGCCGACTGCAGCATGGATAAGCCCGCCGGCACCT_NODE_2_length_343_cov_10.192420	107	.	C	G	40.38	PASS	NS=8:AN=1:DP=119:AS=ATGGAAAGTCTCCCAGCTGCTCTTTGTTGGGCTGGGGAGGAGGGACACAG[C/G]CTGAGTAAGCCTCCTCATCCCCCACCCGCATAGAATCACCCAACAACCCC	GT:DP:GQ:EC:SG	1:12:33:12:G	1:30:87:30:G	1:28:87:28:G	0/1:13:20:12:G	1:22:63:22:G	1:4:9:4:G	1:7:18:7:G	1:3:6:3:G
2513_GGCCGCCGCCTCTCCGCACCCTGCCGCGCACAAAG_NODE_2_length_243_cov_7.991769	208	.	T	C	46.5	PASS	NS=8:AN=1:DP=154	GT:DP:GQ:EC:SG	0/1:11:47:8:Y	1:1:10:1:T	0:18:54:0:T	0/1:54:71:24:Y	0/1:35:73:21:Y	0/1:13:45:8:Y	0/1:3:10:1:T	0/1:19:62:11:Y
1520_GGCCGAGGAGGGAACACTGGGTATCTTTTTAGGGG_NODE_2_length_297_cov_5.703704	107	.	T	C	57.12	PASS	NS=8:AN=1:DP=191:AS=GGTAAGGGGGCTAACTCTCCCCCCCTGTTTTTACCCATTCCAGCAGAAGA[T/C]CCCCAGGTCTGCTGCAAAAGGAACCTCACTTTGGCGCGTGGACAGAGCTC	GT:DP:GQ:EC:SG	1:9:27:9:C	0/1:46:60:33:Y	1:47:98:47:C	0:38:144:0:T	1:23:69:23:C	0/1:11:11:2:T	1:15:45:15:C	1:2:3:2:C
7358_GGCCGGGGGTCCCGGGTGAGGTGGTGTGAGGGGAT_NODE_2_length_279_cov_8.075269	68	.	G	A	85.75	PASS	NS=8:AN=1:DP=180:AS=AGGGACCCCAAGATCCCTCCAAAGATCTCCAGCAATGAACACAAGTCCCC[G/A]CCACTCCCAGGCTGCCCCAGCTCTGCTCCTGGTGGATCGGGGGAGGGGAC	GT:DP:GQ:EC:SG	0/1:15:75:7:R	0:44:162:0:G	0:43:156:0:G	0:28:111:0:G	0/1:12:65:6:R	0:11:60:0:G	0/1:23:18:3:G	0:4:39:0:G
933_GGCCGGGGAGTGACAGGGCAGGGCCACAACCCACG_NODE_2_length_314_cov_5.528662	234	.	A	G	32.38	PASS	NS=8:AN=1:DP=94:AS=GCCTACAGGACAGAGTAGAACTGCCCCAGAAGGTTTCCAAGGAGCGGCTC[A/G]TGGATTTCAACTACCAACGTTTTGGTTAGTAGCTGAGCCCTTAACCGCTG	GT:DP:GQ:EC:SG	1:11:30:11:G	1:1:12:1:A	1:8:21:8:G	1:43:100:42:G	1:11:33:11:G	1:5:15:5:G	1:6:21:6:G	1:9:27:9:G
650_GGCCGCACCTTTCTCCCGTGGAAGCCGCTCGGCCC_NODE_2_length_329_cov_14.124620	34	.	T	C	41.83	PASS	NS=6:AN=1:DP=147	GT:DP:GQ:EC:SG	.:0:0:0:.	0/1:77:103:39:Y	0/1:34:64:25:Y	0/1:10:16:3:Y	0/1:4:0:1:Y	0/1:5:6:2:Y	0/1:17:62:12:Y	.:0:0:0:.
7903_GGCCGAGCCCGCTCAGAGAGCCGCTTCCGCCCGTC_NODE_2_length_278_cov_5.723022	46	.	A	T	14.62	PASS	NS=8:AN=1:DP=44	GT:DP:GQ:EC:SG	1:3:6:3:T	1:5:12:5:T	1:12:36:12:T	1:7:18:7:T	1:4:9:4:T	1:3:6:3:T	1:9:24:9:T	1:1:6:1:A
10151_GGCCGCCCACTGCGTAGAGGAGCCCGTTGAACACG_NODE_2_length_280_cov_18.378571	169	.	G	A	164.88	PASS	NS=8:AN=1:DP=447:AS=TGGGCTCTTCTCCAAGTAGCTTAATAAAGGAAGTGGTCTTATGGAGAGTG[G/A]GATGAGGGATGGGGGGACATCACCAAGTGCCTGCTTTGCCTTTACAAGTG	GT:DP:GQ:EC:SG	0/1:23:69:11:R	0:33:126:0:G	0:61:209:0:G	0:102:235:0:G	0:63:207:0:G	0:42:153:0:G	0:100:224:0:G	0:23:96:0:G
11170_GGCCGTTGGAGCTGGCCAATGGGCGCCGGGGGCAG_NODE_2_length_341_cov_24.791788	298	.	A	C	72.12	PASS	NS=8:AN=1:DP=350:AS=ATAATAGATATTATCTTGGTTTGGAGGGAGCTTCCACCTCTGCACTGTTT[A/C]GTATTAGTCAGACTTCTGTAGTTAAGGATGGCGGAAAGTTAACTTAATTA	GT:DP:GQ:EC:SG	0/1:70:96:34:M	0/1:12:42:6:M	0/1:44:89:20:M	0/1:63:80:26:M	0/1:65:84:33:M	0/1:26:55:9:M	0/1:45:62:19:M	0/1:25:69:11:M
6152_GGCCGAGTGTCACATCCAGGCACTCTGCAGCATGC_NODE_2_length_307_cov_17.960913	74	.	G	A	48.25	PASS	NS=8:AN=1:DP=77:AS=CCATGACAGTTGATGAGCTGTCAGGGATGCCTTGGCAGGAAATTCCTAGA[G/A]TAAATGGGGGCTGATCGGGATGATTTTACAGTTTCTTCCAACTGAAGTGT	GT:DP:GQ:EC:SG	0:6:45:0:G	0/1:23:81:11:R	1:17:48:17:A	0:6:45:0:G	0/1:5:23:1:G	0:3:36:0:G	0:11:60:0:G	0:6:48:0:G
10990_GGCCGCCCGCTACCAGCAGCTAGACGCTGCACGCC_NODE_2_length_228_cov_5.035088	211	.	A	G	24.14	PASS	NS=7:AN=1:DP=21	GT:DP:GQ:EC:SG	0:2:33:0:A	.:0:0:0:N	0:4:39:0:A	0:5:45:0:A	1:1:4:1:A	1:3:6:3:G	0:1:30:0:A	1:5:12:5:G
5834_GGCCGTGCTTTATTCCCCTAGCCGTCCCCTAGGGA_NODE_2_length_216_cov_13.564815	184	.	G	A	95.75	PASS	NS=8:AN=1:DP=189	GT:DP:GQ:EC:SG	0:21:93:0:G	1:3:6:3:A	0:19:84:0:G	0:56:202:0:G	0:43:159:0:G	0:15:72:0:G	0:23:96:0:G	0:9:54:0:G
9767_GGCCGAATATTTGGCACAAAGCATCAACTTCTAAA_NODE_2_length_308_cov_13.444805	212	.	G	A	143.25	PASS	NS=8:AN=1:DP=427:AS=AGCCAGGCAGGGTGCTTGTCGCCCGCGGTTGCAATCTGTGCGCACTTGCT[G/A]TTACTTTTGTATCCAGTTCCCCTTGGCTCGGTATTAAGCTTTATTCACTG	GT:DP:GQ:EC:SG	0/1:27:97:15:R	0:52:184:0:G	0:70:210:0:G	0:93:229:0:G	0:48:171:0:G	0:38:141:0:G	0/1:83:99:49:R	0/1:16:15:4:R
6473_GGCCGGGACAAGTGTCCCGGGAGCACCAAGATGCA_NODE_2_length_282_cov_9.762411	256	.	C	T	30.12	PASS	NS=8:AN=1:DP=73	GT:DP:GQ:EC:SG	1:9:24:9:T	1:2:3:2:T	1:10:27:10:T	0/1:18:39:6:Y	0/1:21:79:11:Y	0:8:51:0:C	1:4:9:4:T	1:1:9:1:C
10950_GGCCGTTTTGAGCGGCTTGCTTTTTCTCCTGGTAG_NODE_4_length_170_cov_8.323529	25	.	G	C	54.33	PASS	NS=6:AN=1:DP=53	GT:DP:GQ:EC:SG	0:2:33:0:G	0:15:72:0:G	0/1:8:56:5:S	0:20:87:0:G	.:0:0:0:.	0:6:45:0:G	.:0:0:0:.	0:2:33:0:G
8010_GGCCGTGGGCGGGCGAGCGAAGGACGAGCCTCTGC_NODE_2_length_303_cov_12.475247	235	.	G	A	139.25	PASS	NS=8:AN=1:DP=341	GT:DP:GQ:EC:SG	0:17:78:0:G	0/1:20:58:7:R	0:65:211:0:G	0:79:216:0:G	0:59:205:0:G	0:17:78:0:G	0:64:208:0:G	0/1:20:60:9:R
1637_GGCCGCTCCTCGGCCCCTAACCGGGGCAGGGGCGC_NODE_2_length_274_cov_13.372263	22	.	C	T	19.5	PASS	NS=6:AN=1:DP=36	GT:DP:GQ:EC:SG	.:0:0:0:.	1:12:33:12:T	1:14:42:14:T	0/1:4:20:3:Y	1:2:3:2:T	1:1:13:1:C	1:3:6:3:T	.:0:0:0:.
9149_GGCCGCTAACCAAAAGGTTGGCAGTTGGAATCCAC_NODE_2_length_211_cov_10.270143	74	.	T	A	42	PASS	NS=8:AN=1:DP=125	GT:DP:GQ:EC:SG	0/1:13:14:2:T	0:41:101:0:T	0:18:81:0:T	0/1:10:31:1:T	0/1:11:31:4:W	0:1:30:0:T	0/1:26:6:4:T	0:5:42:0:T
9076_GGCCGGACCTTCCTCCCGTGGAAGCTGCTCGGCCC_NODE_2_length_171_cov_9.625731	140	.	T	C	24.62	PASS	NS=8:AN=1:DP=98	GT:DP:GQ:EC:SG	0/1:13:16:5:Y	0/1:10:6:9:C	0/1:4:11:1:T	0/1:27:0:6:Y	0/1:8:44:5:Y	0/1:9:33:4:Y	0:25:84:0:T	1:2:3:2:C
6320_GGCCGTTTGTAGAATGTAACATGTCTGTTACACGG_NODE_2_length_248_cov_13.673388	165	.	G	A	73.38	PASS	NS=8:AN=1:DP=186	GT:DP:GQ:EC:SG	0:6:45:0:G	0:6:45:0:G	0/1:29:89:19:R	0:33:126:0:G	0/1:46:93:26:R	0/1:17:81:11:R	0/1:42:90:27:R	1:7:18:7:A
8689_GGCCGCTGCTCGAGAGCCGGAGACATTGGCCCAAG_NODE_2_length_278_cov_10.787769	67	.	T	C	44.38	PASS	NS=8:AN=1:DP=110:AS=ACCTTTTGGTTAGCAGCTGTAGCTCTTAACCACTGCGCCACCAGGGTTTC[T/C]GCTCTCCTCTGGGGTCCTGTAAATCTCTCGTAAAACACCACAAATTTAGA	GT:DP:GQ:EC:SG	0:1:30:0:T	0/1:42:91:27:Y	0/1:25:36:7:Y	0:18:81:0:T	0/1:7:43:4:Y	1:1:0:1:C	0:14:41:0:T	0:2:33:0:T
1082_GGCCGAATAGTGGGATCGCCGCTTTCGCGCCGCGC_NODE_2_length_213_cov_5.183099	27	.	G	A	67	PASS	NS=8:AN=1:DP=112	GT:DP:GQ:EC:SG	0:5:42:0:G	0/1:12:71:6:R	1:39:120:39:A	0:12:63:0:G	0:10:57:0:G	0:6:45:0:G	0:25:102:0:G	0:3:36:0:G
4610_GGCCGTTCTGAAAGGACTAAGGGGACACAGTATAG_NODE_2_length_329_cov_8.747721	300	.	G	A	25.71	PASS	NS=7:AN=1:DP=78	GT:DP:GQ:EC:SG	0:4:39:0:G	.:0:0:0:.	0/1:26:3:5:R	0/1:21:57:8:R	0/1:10:34:1:G	0/1:3:6:1:G	0/1:5:15:3:R	0/1:9:26:3:R
7150_GGCCGGGCTGGTCCAGGAAGTCCCTCCGACCACCG_NODE_2_length_318_cov_5.424528	215	.	C	G	53.62	PASS	NS=8:AN=1:DP=366	GT:DP:GQ:EC:SG	0/1:33:17:5:C	0/1:37:48:4:C	0/1:47:21:11:S	0:72:129:0:C	0/1:67:100:6:C	0/1:35:41:4:C	0/1:62:7:12:C	0:13:66:0:C
268_GGCCGGGGAGAAAAGGCCTCTTGCTATACTCTTTT_NODE_2_length_323_cov_12.445821	152	.	C	T	104.88	PASS	NS=8:AN=1:DP=443	GT:DP:GQ:EC:SG	0/1:44:23:10:Y	0:144:255:0:C	0/1:38:60:3:C	0:65:109:0:C	0:54:166:0:C	0:24:99:0:C	0/1:22:35:2:C	0/1:52:92:28:Y
3355_GGCCGGCTCGGGGCGCAAGGCCTTCTCCAAGCCAG_NODE_2_length_229_cov_11.323144	70	.	G	A	49.25	PASS	NS=8:AN=1:DP=128	GT:DP:GQ:EC:SG	0:8:51:0:G	0/1:31:8:5:R	0:33:109:0:G	0:17:78:0:G	0:19:84:0:G	1:1:0:1:A	0/1:16:58:6:R	1:3:6:3:A
5172_GGCCGCAGTCTGCACCGCACTCAGTTTGCTCAGTT_NODE_2_length_304_cov_22.361841	290	.	A	C	46	PASS	NS=7:AN=1:DP=60	GT:DP:GQ:EC:SG	0:19:84:0:A	.:0:0:0:.	0:3:36:0:A	0:16:75:0:A	1:4:12:4:C	0/1:6:22:1:A	0:3:36:0:A	0:9:57:0:A
9926_GGCCGTGATCTGGTCAACGTGGCCAAGAAGCGAAC_NODE_2_length_171_cov_3.198830	41	.	T	C	6.83	q10	NS=6:AN=1:DP=17	GT:DP:GQ:EC:SG	.:0:0:0:.	1:7:18:7:C	1:2:9:2:C	0/1:2:3:1:T	1:4:9:4:C	.:0:0:0:.	1:1:1:1:T	1:1:1:1:T
4591_GGCCGCTGGGTTCCTACACTCAAAATTGAAGTTCA_NODE_2_length_234_cov_8.025641	112	.	A	G	19.43	PASS	NS=7:AN=1:DP=40	GT:DP:GQ:EC:SG	1:2:3:2:G	.:0:0:0:.	1:4:9:4:G	0:14:44:0:A	1:7:18:7:G	1:6:15:6:G	0/1:6:43:4:R	1:1:4:1:A
5037_GGCCGGAAGCTCGAGGGCATGGATGGGCCCCAACC_NODE_2_length_232_cov_6.435345	68	.	T	A	21.88	PASS	NS=8:AN=1:DP=61:AS=GATGTCCAATCAGATTACAGACACAAGTGTTTAAAAACGGTTTATTATGC[T/A]AAATGTTAACTTTTATAAAAAGTTTAATATACATTGCATGGTTACAGAAA	GT:DP:GQ:EC:SG	1:6:15:6:A	1:21:60:21:A	1:10:27:10:A	0/1:5:21:4:W	1:11:30:11:A	1:2:3:2:A	1:5:12:5:A	1:1:7:1:T
785_GGCCGTGACGGACTCGTAGGCATCCTCGAAGTGTT_NODE_2_length_277_cov_10.530686	180	.	A	T	142.38	PASS	NS=8:AN=1:DP=373	GT:DP:GQ:EC:SG	0/1:24:25:8:W	0:43:156:0:A	0:51:181:0:A	0:85:217:0:A	0:67:209:0:A	0:27:108:0:A	0:49:175:0:A	0:27:68:0:A
4799_GGCCGAGCCTCAGTGGGAGGAAGCACTGTGTTCTG_NODE_2_length_345_cov_11.962318	137	.	C	A	58.62	PASS	NS=8:AN=1:DP=211	GT:DP:GQ:EC:SG	0/1:16:62:9:M	1:16:45:16:A	0/1:54:85:32:M	0/1:38:63:15:M	1:18:51:18:A	1:14:39:14:A	1:47:119:47:A	0/1:8:5:2:M
9724_GGCCGGGGCAGGTGAGATGCAGCGTGGCGGGGAGC_NODE_2_length_333_cov_14.936937	29	.	A	G	15.14	PASS	NS=7:AN=1:DP=42	GT:DP:GQ:EC:SG	1:1:3:1:A	1:19:54:19:G	1:3:6:3:G	0/1:6:10:5:R	1:10:27:10:G	1:1:3:1:A	1:2:3:2:G	.:0:0:0:N
1263_GGCCGTGTACCTCTGTGCCAGTAGCTTAGCCACAG_NODE_2_length_296_cov_17.766891	96	.	C	G	49.38	PASS	NS=8:AN=1:DP=213	GT:DP:GQ:EC:SG	0/1:5:20:3:S	0/1:59:6:51:S	0/1:36:48:10:S	0/1:46:81:19:S	0/1:23:88:13:S	0/1:19:64:8:S	0/1:23:85:12:S	0/1:2:3:1:C
9678_GGCCGAGAAGGTTCCGCGTGGGACTGTAGAGGGAC_NODE_2_length_207_cov_8.661836	34	.	C	A	34.25	PASS	NS=8:AN=1:DP=326	GT:DP:GQ:EC:SG	0/1:22:69:10:M	0/1:68:55:25:M	0/1:78:15:20:M	0/1:50:0:10:M	0/1:32:42:9:M	0/1:25:19:6:M	0/1:46:71:4:C	0/1:5:3:2:C
8408_GGCCGCAGCATCAGGGGAAAGGTGAGAAGAGAAAG_NODE_2_length_252_cov_14.111111	37	.	C	T	38.5	PASS	NS=8:AN=1:DP=88	GT:DP:GQ:EC:SG	0:7:48:0:C	0/1:29:63:14:Y	1:29:84:29:T	0:10:57:0:C	0:3:36:0:C	0/1:3:5:2:Y	1:5:12:5:T	1:2:3:2:T
2926_GGCCGCGAGGGGGCAGCAGACGCCGGCAGCGGCGG_NODE_2_length_295_cov_7.728814	119	.	C	T	51.43	PASS	NS=7:AN=1:DP=67:AS=AGTGTGATTCCAAACCTTTTCCCTAAACCAGGTTACGACCCTCATGTTTT[C/T]ACTCATTATTTTTGCACTTAAGTGGCTTCGACAAAGCCATCTTTAGAACG	GT:DP:GQ:EC:SG	0:11:60:0:C	0:1:30:0:C	.:0:0:0:.	0:25:102:0:C	0:4:39:0:C	0:6:45:0:C	0:17:78:0:C	1:3:6:3:T
4120_GGCCGCATTAAGTCATCCCCCCTCCCGGGCCGGAT_NODE_2_length_220_cov_15.268182	212	.	G	A	22.33	PASS	NS=6:AN=1:DP=18	GT:DP:GQ:EC:SG	.:0:6:0:G	.:0:0:0:N	0:2:33:0:G	0:5:42:0:G	0/1:3:0:2:R	0:1:30:0:G	1:4:9:4:A	0/1:3:20:1:G
9149_GGCCGCTAACCAAAAGGTTGGCAGTTGGAATCCAC_NODE_2_length_211_cov_10.270143	149	.	C	T	45.88	PASS	NS=8:AN=1:DP=186	GT:DP:GQ:EC:SG	0/1:18:24:6:Y	0:34:102:0:C	0:31:120:0:C	0/1:18:16:3:C	0/1:28:12:5:C	0/1:13:20:2:C	0/1:36:19:6:C	0:8:54:0:C
3430_GGCCGCCCCGAGCGGGAGGTGACAGGGGCCAGACT_NODE_2_length_192_cov_15.484375	37	.	G	T	19.62	PASS	NS=8:AN=1:DP=82	GT:DP:GQ:EC:SG	0/1:10:5:3:G	0/1:19:28:3:G	0/1:15:35:11:K	0/1:16:5:5:K	1:11:30:11:T	0:4:39:0:G	1:4:9:4:T	1:3:6:3:T
7073_GGCCGCGGACTTCCGCAGTCCTGTCTGGCCCCCAG_NODE_2_length_310_cov_15.290322	198	.	C	T	104.75	PASS	NS=8:AN=1:DP=245:AS=GTTGTAACACAATAAATGGCACGGTGAGAGAAGGAGTCAATTTTTTCACA[C/T]AGACCAAAAAAAGAAAAAAGCTCCTGCGAGAAGCAACTTCAGCCATCTTT	GT:DP:GQ:EC:SG	0/1:16:78:10:Y	1:40:123:40:T	1:40:126:40:T	0:42:159:0:C	1:37:111:37:T	0/1:26:92:13:Y	1:34:102:34:T	0/1:10:47:5:Y
4776_GGCCGTCTGGATCTCCCTGGACGTGATGGTCGAGC_NODE_1_length_203_cov_3.359606	155	.	A	C	78	PASS	NS=8:AN=1:DP=156	GT:DP:GQ:EC:SG	0:27:111:0:A	0:16:75:0:A	0:24:102:0:A	0:10:57:0:A	0/1:23:60:11:M	0:8:51:0:A	1:45:132:45:C	0:3:36:0:A
4843_GGCCGTCACCCTGTGGAGACGTGCCCATGAGCTCC_NODE_2_length_323_cov_20.170279	114	.	T	C	121.14	PASS	NS=7:AN=1:DP=233	GT:DP:GQ:EC:SG	0/1:3:9:1:T	0:40:147:0:T	0:60:208:0:T	0:17:78:0:T	0:51:181:0:T	0/1:10:41:5:Y	0:52:184:0:T	.:0:0:0:.
6273_GGCCGGCCTGGCCCCAGCCCGCGTCCTCAGGGGAC_NODE_2_length_224_cov_4.982143	68	.	T	C	59.5	PASS	NS=8:AN=1:DP=131:AS=TTTCTCCTCCAACTCCCTGAACCTCAGTGGGCTGGACTATGAAATGGGCA[T/C]AGCAGAACACAGGTGACAGGGATGCTTACGGTGGAAAGACTAGTGCGAGT	GT:DP:GQ:EC:SG	0/1:13:46:5:Y	0/1:30:78:12:Y	0/1:37:79:16:Y	0:17:81:0:T	0:11:60:0:T	1:4:9:4:C	0/1:15:84:9:Y	0:4:39:0:T
72_GGCCGCGCACTCTCGCCCTGGGGCGCAAGAACGCC_NODE_2_length_247_cov_23.356276	188	.	T	C	104.88	PASS	NS=8:AN=1:DP=245:AS=GTTGTTTATTCAGGAAACTTTTTTGATATTGGTTTAGTCCAGTTGTGCTG[T/C]GTGTCAGCATTTTAAGGAACTATCTAAAAGTTAAGAAATGTGAAAGGAAA	GT:DP:GQ:EC:SG	0:27:108:0:T	0:5:42:0:T	0:42:153:0:T	0:72:207:0:T	0:22:93:0:T	1:7:18:7:C	0/1:34:83:12:Y	0:36:135:0:T
3634_GGCCGCCCTCTCGTGGCCAGTGGGGAGGAGCGCAA_NODE_2_length_280_cov_12.817857	133	.	G	A	52.62	PASS	NS=8:AN=1:DP=132	GT:DP:GQ:EC:SG	1:7:18:7:A	1:4:9:4:A	1:17:48:17:A	0:66:208:0:G	0:17:81:0:G	1:5:12:5:A	1:14:42:14:A	1:2:3:2:A
8490_GGCCGCCCGGCCGCCCACCAACTAACACCACCAGC_NODE_2_length_263_cov_13.642586	168	.	T	C	48.25	PASS	NS=8:AN=1:DP=451	GT:DP:GQ:EC:SG	0:14:69:0:T	0/1:41:44:10:Y	0/1:68:53:8:T	0/1:125:13:32:Y	0/1:79:23:13:T	0/1:48:96:30:Y	0/1:63:49:7:T	0/1:13:39:1:T
7558_GGCCGGCACTTTCTCCCGGTTTGCAGGGCCGCAGG_NODE_2_length_257_cov_21.342413	236	.	G	C	18.86	PASS	NS=7:AN=1:DP=48	GT:DP:GQ:EC:SG	1:7:18:7:C	.:0:0:0:.	1:13:36:13:C	1:3:9:3:C	1:6:15:6:C	1:5:12:5:C	1:2:6:2:C	1:12:36:12:C
7419_GGCCGGGTGTTTGCATAGAACGTTATCCGCTGAAT_NODE_2_length_176_cov_9.522727	17	.	G	A	30.38	PASS	NS=8:AN=1:DP=298	GT:DP:GQ:EC:SG	1:17:48:17:A	0/1:116:23:105:A	0/1:47:2:40:A	0/1:30:19:26:R	0/1:27:54:21:R	1:10:27:10:A	1:45:58:42:A	0/1:6:12:5:R
3261_GGCCGGTGGGCGCATAGAGGGCTGAGAGCTCCTTC_NODE_2_length_235_cov_8.195745	23	.	T	G	10.71	PASS	NS=7:AN=1:DP=25	GT:DP:GQ:EC:SG	1:1:6:1:T	1:13:36:13:G	1:3:6:3:G	0/1:3:11:2:K	1:3:6:3:G	1:1:2:1:T	1:1:8:1:T	.:0:0:0:.
3905_GGCCGCTCCTATAAGAGGCAAGCAGCGCGGCCCGC_NODE_2_length_350_cov_18.731428	310	.	C	G	59.5	PASS	NS=8:AN=1:DP=173	GT:DP:GQ:EC:SG	0/1:28:88:13:S	0/1:3:19:1:C	0/1:13:40:5:S	0/1:52:62:16:S	0/1:32:90:16:S	0/1:11:52:7:S	0/1:24:80:14:S	0/1:10:45:6:S
2254_GGCCGGGTTGCCCGCCTAGGAGCCGATGAGTCTGA_NODE_2_length_317_cov_23.293375	37	.	A	T	16.5	PASS	NS=6:AN=1:DP=35	GT:DP:GQ:EC:SG	.:0:0:0:.	1:12:33:12:T	1:10:27:10:T	1:4:15:4:T	1:4:12:4:T	1:3:6:3:T	1:2:6:2:T	.:0:0:0:.
9654_GGCCGCGCGTGTTAAACAGGACGCCTGGGAGGGAG_NODE_2_length_276_cov_10.952899	78	.	A	G	51.62	PASS	NS=8:AN=1:DP=119	GT:DP:GQ:EC:SG	1:5:12:5:G	0:32:123:0:A	0/1:15:18:4:R	0/1:14:74:9:R	1:11:30:11:G	1:8:21:8:G	0:28:117:0:A	0/1:6:18:3:R
9678_GGCCGAGAAGGTTCCGCGTGGGACTGTAGAGGGAC_NODE_2_length_207_cov_8.661836	115	.	G	C	46.75	PASS	NS=8:AN=1:DP=465	GT:DP:GQ:EC:SG	0/1:19:52:7:S	0/1:43:10:7:G	0/1:65:51:21:S	0/1:91:56:32:S	0/1:77:28:13:G	0/1:29:65:10:S	0/1:122:54:43:S	0/1:19:58:7:S
7709_GGCCGGGTATTTGCATAGAACGTTATCTGCGGAAT_NODE_2_length_171_cov_6.614035	97	.	C	G	32.5	PASS	NS=8:AN=1:DP=577	GT:DP:GQ:EC:SG	0:25:62:0:C	0/1:11:4:2:S	0/1:84:30:14:C	0/1:160:80:72:S	0/1:62:22:13:S	0/1:60:29:16:S	0/1:86:27:17:C	0/1:89:6:20:S
1283_GGCCGGACTGCGGCGGCAGCAGGTTGGACGCAGAG_NODE_2_length_262_cov_22.824427	53	.	A	G	45	PASS	NS=8:AN=1:DP=166:AS=CATAGCGACCTTACAGGACAGAGTAGAACTGCCCCTAGCGTTGCCAAGGA[A/G]AGGCTGATGGATTCAAGCTGCTGACCTTTTGGTTAGTAGCCGAGCCCATA	GT:DP:GQ:EC:SG	1:11:30:11:G	0/1:46:74:20:R	0/1:46:66:19:R	0:26:105:0:A	1:5:15:5:G	0/1:10:10:2:A	1:18:51:18:G	1:4:9:4:G
976_GGCCGAAGCAGAAGGCAAATGTGAAGGCAGCAGCT_NODE_2_length_312_cov_4.391026	161	.	G	T	28.62	PASS	NS=8:AN=1:DP=83:AS=GGCCAGGGTGAGTCTTTTACTGTCCTGTAAAACGGGTTGCATCTAGTCAT[G/T]CTGGCTCATAACCCCGTAGGGTTTCCAAGACTGTAATCCTTATGGAAGCA	GT:DP:GQ:EC:SG	1:1:1:1:G	1:4:9:4:T	1:34:99:34:T	1:7:18:7:T	1:4:9:4:T	1:12:33:12:T	1:19:54:19:T	1:2:6:2:T
6819_GGCCGCGACTGATGGCGGGGCGGGGTGGCAGACGT_NODE_2_length_266_cov_6.620301	47	.	A	T	21.43	PASS	NS=7:AN=1:DP=57	GT:DP:GQ:EC:SG	1:9:24:9:T	1:13:36:13:T	1:9:24:9:T	1:14:39:14:T	1:5:12:5:T	1:3:6:3:T	1:4:9:4:T	.:0:0:0:.
4082_GGCCGTCCCATTCCTAGAAAGTATATTTTCTCTCC_NODE_4_length_169_cov_13.627219	154	.	T	C	25.38	PASS	NS=8:AN=1:DP=89	GT:DP:GQ:EC:SG	0/1:11:7:3:Y	1:9:24:9:C	0/1:11:13:3:Y	0/1:14:40:6:Y	1:4:12:4:C	0/1:16:41:6:Y	1:19:54:19:C	1:5:12:5:C
6796_GGCCGCCTTCCCGGAAGGTTCCTGGGGAGAGGGGG_NODE_2_length_299_cov_11.204014	284	.	A	C	30.43	PASS	NS=7:AN=1:DP=76	GT:DP:GQ:EC:SG	1:10:27:10:C	.:0:0:0:.	1:10:27:10:C	1:7:18:7:C	1:22:66:22:C	1:8:21:8:C	1:16:45:16:C	1:3:9:3:C
1417_GGCCGCGGGCGGCAAGGAGGCGGGCCCGGATCCTG_NODE_2_length_223_cov_8.937220	127	.	A	G	109.38	PASS	NS=8:AN=1:DP=2183	GT:DP:GQ:EC:SG	0/1:166:113:78:R	0/1:229:113:49:A	0/1:449:83:116:A	0/1:607:114:126:A	0/1:226:138:118:R	0/1:170:104:74:R	0/1:270:111:161:R	0/1:66:99:28:R
3132_GGCCGGCCGGTTTAAAGAGCTACTACAACAGGGGC_NODE_2_length_211_cov_13.284360	122	.	A	G	18.29	PASS	NS=7:AN=1:DP=26	GT:DP:GQ:EC:SG	1:5:12:5:G	1:2:6:2:G	0:2:33:0:A	0:5:42:0:A	0/1:3:8:2:R	1:3:6:3:G	1:6:21:6:G	.:0:0:0:.
3854_GGCCGGAAAAGCGCTGCAAAAACGCAAGGGGTTGT_NODE_2_length_323_cov_9.089784	172	.	G	A	130.5	PASS	NS=8:AN=1:DP=325:AS=ATCTCCCCCACTCCCAGCGCCCTGTTCTTCTCGGGGCCATTGCATAGTGT[G/A]GCCGAACCCAGCCTCCTTGGGTACTCGGGCTGAGGGGAGGAAGGCTTTGG	GT:DP:GQ:EC:SG	0:27:111:0:G	0/1:51:90:29:R	0:47:145:0:G	0:51:181:0:G	0:45:165:0:G	0:23:99:0:G	0:76:211:0:G	0:5:42:0:G
1754_GGCCGCTACCGCGCGCTAACTTGAAACGGCAGGCT_NODE_2_length_322_cov_11.701863	245	.	G	A	140.12	PASS	NS=8:AN=1:DP=352:AS=GTACCCATGCAGCAGGTCCGCGGACCGTACTTTGAGTAGCAAAGTCATCG[G/A]AGCAATGATTCTCGCCCTTAAAGGTGTATTTAGAATAATCTGGGAGCTAT	GT:DP:GQ:EC:SG	0:41:150:0:G	0:20:87:0:G	0:46:165:0:G	0:56:196:0:G	0:59:202:0:G	0/1:41:71:20:R	0:66:207:0:G	0/1:23:43:8:R
10006_GGCCGGAGCGCGCAATTGGGGCGCCCCTCCCTCCG_NODE_2_length_217_cov_15.101382	168	.	T	C	41	PASS	NS=8:AN=1:DP=167:AS=GTCAGAGCTGCGAAACAAAGCATACCCTGGCGGGAGGAGGCAGGTAGCGA[T/C]AGAGTCTTTTGAATGGAGTGGATTTTACGCGCTCTCTTTTCCATCTTTAT	GT:DP:GQ:EC:SG	1:15:42:15:C	1:14:45:14:C	1:17:51:17:C	0/1:53:92:27:Y	0/1:14:11:5:Y	1:11:30:11:C	0/1:33:30:25:Y	1:10:27:10:C
6129_GGCCGGCGGCCACAGAGTGGCTGAGGCGCCGATTC_NODE_2_length_200_cov_8.005000	142	.	T	C	35.38	PASS	NS=8:AN=1:DP=89	GT:DP:GQ:EC:SG	0/1:10:43:5:Y	0:20:87:0:T	0:16:75:0:T	0/1:16:4:5:Y	0/1:11:30:4:Y	0/1:7:8:2:T	0/1:5:26:1:T	0/1:4:10:3:Y
3709_GGCCGCGCTGGGCCTGAAGCCCCTATAGGAACGGA_NODE_2_length_266_cov_10.443609	266	.	A	C	7.57	q10	NS=7:AN=1:DP=12	GT:DP:GQ:EC:SG	1:2:3:2:C	.:0:0:0:.	1:1:2:1:A	1:1:4:1:A	1:5:12:5:C	1:1:15:1:A	1:1:15:1:A	1:1:2:1:A
10448_GGCCGCCGGCGGCCTAGCGCCTCTAGGGACCAGTG_NODE_2_length_354_cov_11.062147	79	.	A	C	35.17	PASS	NS=6:AN=1:DP=88:AS=AATATACTGATATTTGCTAGACCACTTGGGGTTTTAAAATGTTAACGCAC[A/C]TATAGGAGAAGCGCCCTCGGGGATAATTGTAGAGGGTATGCATGTGTCCA	GT:DP:GQ:EC:SG	.:0:0:0:.	1:53:121:53:C	1:23:66:23:C	1:2:3:2:C	1:2:3:2:C	1:4:9:4:C	1:4:9:4:C	.:0:0:0:.
3004_GGCCGCGGCTTCTACTCCTTCAGACTAAACCACGG_NODE_2_length_296_cov_14.871622	61	.	A	G	35.33	PASS	NS=6:AN=1:DP=44:AS=GATGGGGATGGGAAGACCGCAATTCAATTGCTGAAGTTGCTAAGGAAAAG[A/G]GAGACTGCTTGGAGGCCCTTAGGTGACAGAGATATGAAATAAAGCAAGTC	GT:DP:GQ:EC:SG	.:0:0:0:.	0:23:72:0:A	0/1:11:54:6:R	0:6:45:0:A	1:1:4:1:A	0:2:33:0:A	1:1:4:1:A	.:0:0:0:.
3142_GGCCGGTTTAAAGAGCTACTACAACAGGCGCTCTA_NODE_2_length_242_cov_7.652893	105	.	C	T	42.12	PASS	NS=8:AN=1:DP=283	GT:DP:GQ:EC:SG	0/1:10:27:1:C	0/1:54:23:12:Y	0/1:48:70:4:C	0/1:51:86:22:Y	0/1:38:4:6:C	0/1:13:36:1:C	0/1:64:83:6:C	0/1:5:8:2:Y
5553_GGCCGCCAGGTTAGTCGTCAGAGCGCAGACCCCGC_NODE_1_length_346_cov_31.421965	194	.	G	A	70.12	PASS	NS=8:AN=1:DP=404	GT:DP:GQ:EC:SG	0/1:18:26:2:G	0/1:33:47:9:R	0:76:157:0:G	0:82:184:0:G	0/1:57:7:11:R	0/1:41:65:14:R	0/1:83:36:23:R	0/1:14:39:5:R
1754_GGCCGCTACCGCGCGCTAACTTGAAACGGCAGGCT_NODE_2_length_322_cov_11.701863	23	.	C	T	9.29	q10	NS=7:AN=1:DP=25	GT:DP:GQ:EC:SG	1:1:9:1:C	1:5:12:5:T	1:5:12:5:T	1:1:2:1:C	1:4:9:4:T	1:5:12:5:T	0/1:4:9:3:Y	.:0:0:0:.
5936_GGCCGGGGGGAGGGGGCAAGGGGTGCGCTCCGGTT_NODE_2_length_284_cov_8.073944	83	.	C	G	19.25	PASS	NS=8:AN=1:DP=54:AS=GTTCGGGTGATTGCATGTGTCTCCCCCCTGAGTCCCGCGCGCGCACCGGA[C/G]TTGCACGCTGTTTGCAAACATAGGAACATTCTGTGCACGACTGCAGAGAA	GT:DP:GQ:EC:SG	1:1:3:1:C	1:10:27:10:G	1:22:66:22:G	1:6:18:6:G	1:4:9:4:G	1:2:3:2:G	1:8:21:8:G	1:1:7:1:C
8212_GGCCGAGGGCTGCTTGGGCCTGGAGCAGCTCACAC_NODE_2_length_236_cov_5.080509	38	.	C	A	13.86	PASS	NS=7:AN=1:DP=42	GT:DP:GQ:EC:SG	1:3:6:3:A	1:11:30:11:A	1:9:27:9:A	0/1:7:4:6:M	1:2:6:2:A	1:6:15:6:A	1:4:9:4:A	.:0:0:0:.
4974_GGCCGGGTCAGCCAGCCCTGCTCTGTGCCCTGCAG_NODE_2_length_227_cov_8.916300	58	.	A	T	16.29	PASS	NS=7:AN=1:DP=45:AS=GAAGAAATTCTCTCCTGCCCTGCCCACTCTCTGTGCTCTTCAGCTGTCCC[A/T]CTCTCCTCTGGCCTTTGGGACAAGTCTTCTGTGGCTGTTCCCTCTACCTC	GT:DP:GQ:EC:SG	1:1:0:1:W	1:17:48:17:T	1:10:27:10:T	1:3:6:3:T	1:5:12:5:T	1:3:6:3:T	1:6:15:6:T	.:0:0:0:.
4843_GGCCGTCACCCTGTGGAGACGTGCCCATGAGCTCC_NODE_2_length_323_cov_20.170279	125	.	T	C	114.38	PASS	NS=8:AN=1:DP=254	GT:DP:GQ:EC:SG	0/1:4:9:1:T	0:39:144:0:T	0:57:199:0:T	0:30:117:0:T	0:56:196:0:T	0/1:11:50:5:Y	0:56:199:0:T	1:1:1:1:T
5918_GGCCGGGCCAGGTCTCTCTGCTTTAGGGAAAGAGC_NODE_2_length_287_cov_5.282230	175	.	C	T	44.5	PASS	NS=8:AN=1:DP=58	GT:DP:GQ:EC:SG	0:3:36:0:C	0/1:16:75:6:Y	0/1:18:44:5:Y	0:2:33:0:C	0:4:39:0:C	0:1:30:0:C	0:10:60:0:C	0:4:39:0:C
11070_GGCCGCCACATCGCAGGAAGCAGACACGCGTGAAA_NODE_2_length_305_cov_7.390164	72	.	G	A	36.29	PASS	NS=7:AN=1:DP=59	GT:DP:GQ:EC:SG	0/1:2:5:1:G	1:16:45:16:A	0:25:105:0:G	0:7:48:0:G	0:5:45:0:G	1:1:4:1:G	0/1:3:2:1:R	.:0:0:0:.
3287_GGCCGCCGCTGCTTCGTGGAGGCCGCGGAGGTGGG_NODE_2_length_218_cov_7.513762	35	.	A	C	28.12	PASS	NS=8:AN=1:DP=316	GT:DP:GQ:EC:SG	0/1:26:21:6:M	0/1:61:4:12:M	0/1:65:25:10:A	0/1:41:40:10:M	0/1:57:81:25:M	0/1:13:12:2:A	0/1:39:2:6:M	0:14:40:0:A
2063_GGCCGTTTGGGTGCAACCCCCCCCCTGAATTTTCC_NODE_2_length_325_cov_18.692308	299	.	T	C	69.88	PASS	NS=8:AN=1:DP=141	GT:DP:GQ:EC:SG	0:14:69:0:T	0/1:7:35:5:Y	1:3:6:3:C	0:44:119:0:T	0:21:90:0:T	0:19:84:0:T	0:15:75:0:T	0:18:81:0:T
6129_GGCCGGCGGCCACAGAGTGGCTGAGGCGCCGATTC_NODE_2_length_200_cov_8.005000	126	.	G	A	40	PASS	NS=8:AN=1:DP=178	GT:DP:GQ:EC:SG	0/1:11:0:3:R	1:11:30:11:A	0/1:26:63:16:R	0/1:50:32:8:G	0/1:26:21:8:R	0/1:15:36:2:G	0:29:93:0:G	0:10:45:0:G
11204_GGCCGGACGCGCGAGGGAGCCTGGCCCTGGCGGAG_NODE_2_length_312_cov_13.618589	85	.	A	C	49.5	PASS	NS=8:AN=1:DP=127:AS=GTAGTAATAGAAAGATCACTTGTACTTAGATAAGAAATCTGCTCTTGTAT[A/C]TTCCATAAATAGTAGCAGGCGATGTGAATAGTTTTATAGTGTCGAAGTTG	GT:DP:GQ:EC:SG	1:9:24:9:C	1:21:66:21:C	1:37:111:37:C	1:10:39:10:C	1:27:87:27:C	1:7:18:7:C	1:11:33:11:C	1:5:18:5:C
5553_GGCCGCCAGGTTAGTCGTCAGAGCGCAGACCCCGC_NODE_1_length_346_cov_31.421965	233	.	T	C	78.75	PASS	NS=8:AN=1:DP=506	GT:DP:GQ:EC:SG	0/1:22:74:16:Y	0/1:25:58:9:Y	0/1:62:30:51:Y	0/1:93:90:62:Y	0/1:99:104:50:Y	0/1:56:93:28:Y	0/1:124:104:77:Y	0/1:25:77:11:Y
1468_GGCCGGGCAGAGCTGCGTTCAGCTTCACAGCCAGG_NODE_2_length_189_cov_25.164021	82	.	A	C	41.88	PASS	NS=8:AN=1:DP=714	GT:DP:GQ:EC:SG	0/1:10:33:1:A	0/1:251:32:94:M	0/1:171:19:58:M	0/1:83:49:32:M	0/1:72:37:23:M	0/1:32:60:13:M	0/1:90:63:40:M	0:5:42:0:A
6644_GGCCGCCACCCTGGCTCCCACCCTCACACAGAGTG_NODE_2_length_291_cov_9.718213	213	.	T	C	88.88	PASS	NS=8:AN=1:DP=197	GT:DP:GQ:EC:SG	0/1:10:6:3:Y	0:3:36:0:T	0:32:123:0:T	0:60:208:0:T	0/1:20:41:6:Y	0:13:66:0:T	0:48:171:0:T	0:11:60:0:T
9642_GGCCGACTGTGCAGTCGCTATGGTGACAGAAGAAG_NODE_2_length_339_cov_24.412979	282	.	A	T	90.75	PASS	NS=8:AN=1:DP=277:AS=TGTAATCAAGGTCCCAAAACAGGTTCAGGCAATAATGCTTCCCAGGTAAC[A/T]GGGCTGTATCCTTGTTTGTAAATAAGAAATACTTCATTTTCCAAAGTTTA	GT:DP:GQ:EC:SG	0:46:165:0:A	0/1:10:23:3:W	0/1:20:59:15:W	0/1:63:103:33:W	0/1:52:82:32:W	0:20:87:0:A	0/1:31:75:15:W	0:35:132:0:A
7665_GGCCGTGGCCCCGGGCGTCACGGGCCTGCGGAACC_NODE_2_length_222_cov_6.202703	8	.	C	G	10.86	PASS	NS=7:AN=1:DP=34	GT:DP:GQ:EC:SG	1:4:9:4:G	1:4:9:4:G	1:7:18:7:G	1:10:18:10:G	1:5:12:5:G	1:1:4:1:C	1:3:6:3:G	.:0:0:0:.
8977_GGCCGAGAAGGTCCCGCGTGGGACTGTAGAGGGAC_NODE_1_length_227_cov_23.440529	18	.	G	A	31.12	PASS	NS=8:AN=1:DP=94	GT:DP:GQ:EC:SG	0/1:12:30:2:G	0/1:24:60:2:G	0/1:21:3:6:R	0/1:8:19:2:G	0/1:9:21:2:G	0:7:48:0:G	0/1:12:38:6:R	0:1:30:0:G
5172_GGCCGCAGTCTGCACCGCACTCAGTTTGCTCAGTT_NODE_2_length_304_cov_22.361841	204	.	C	G	162.5	PASS	NS=8:AN=1:DP=505	GT:DP:GQ:EC:SG	0:48:171:0:C	0:35:132:0:C	0:90:223:0:C	0:87:224:0:C	0/1:56:104:35:S	0/1:54:111:28:S	0:109:230:0:C	0:26:105:0:C
385_GGCCGCGCACGCGCACTTCCGCTTCCTGCGCTGAG_NODE_5_length_218_cov_10.325688	235	.	A	C	6.86	q10	NS=7:AN=1:DP=14	GT:DP:GQ:EC:SG	1:1:3:1:C	.:0:0:0:.	1:1:6:1:C	1:4:12:4:C	1:3:6:3:C	1:1:12:1:A	1:2:6:2:C	1:2:3:2:C
758_GGCCGGTAAGTGATGCCTCGAGTACTCCTTCTTGT_NODE_2_length_296_cov_14.763514	75	.	A	C	74.88	PASS	NS=8:AN=1:DP=179:AS=CAAGACTCCCCTATTGGTTCCCTGGGAACCCTGGGTAGGTGGTGGACTCT[A/C]CTACCCCAAGAAAGAGACCTGCAACCCTTGCACCTCTTTGTCCTTCAGCC	GT:DP:GQ:EC:SG	0:8:51:0:A	0:29:114:0:A	0/1:54:75:20:M	0:21:90:0:A	0:23:96:0:A	0/1:13:20:4:M	0:24:102:0:A	0:7:51:0:A
4531_GGCCGCCACAATCAGGGCCAGCACAGGGAGGCTCA_NODE_2_length_174_cov_8.068966	120	.	G	A	95.62	PASS	NS=8:AN=1:DP=211:AS=GGGCACGGGTCTGTCAGTGAGGACGGGGTGTCTGCCTGCTCAGTGAGTCT[G/A]GTCTTGGCCGACGGCTGGCATGGAGCAGGCGTTCAGCGTTTGCTGAATAA	GT:DP:GQ:EC:SG	0/1:15:33:5:R	0:14:69:0:G	0/1:26:80:15:R	0:56:196:0:G	0:36:138:0:G	0/1:19:60:10:R	0:33:126:0:G	0:12:63:0:G
268_GGCCGGGGAGAAAAGGCCTCTTGCTATACTCTTTT_NODE_2_length_323_cov_12.445821	267	.	C	T	42	PASS	NS=7:AN=1:DP=280	GT:DP:GQ:EC:SG	0/1:84:47:59:Y	1:16:45:16:T	.:0:0:0:.	0:18:81:0:C	0/1:5:18:3:Y	0:7:51:0:C	0/1:8:6:2:C	0/1:142:46:102:Y
5175_GGCCGCGGGACGCTTGGTGCCTCAGGGAAGGGTTT_NODE_2_length_254_cov_19.889763	180	.	A	C	73.75	PASS	NS=8:AN=1:DP=197	GT:DP:GQ:EC:SG	0/1:40:44:9:M	0:2:33:0:A	0:13:66:0:A	0:41:153:0:A	0/1:34:104:19:M	0/1:18:64:7:M	0:28:111:0:A	0/1:21:15:4:M
2858_GGCCGACAAAGCGCGCCGCTGGGCCTGGGACAGTG_NODE_2_length_301_cov_6.611296	267	.	G	A	36.38	PASS	NS=8:AN=1:DP=600	GT:DP:GQ:EC:SG	0/1:55:51:19:R	0/1:24:40:8:R	0/1:29:11:5:G	0/1:200:24:57:G	0/1:97:13:25:R	0/1:68:75:34:R	0/1:91:3:22:G	0/1:36:74:17:R
1374_GGCCGTTCGCGAAGGGCAGATATGCCGAGCTCATT_NODE_13_length_164_cov_22.750000	43	.	G	A	40.62	PASS	NS=8:AN=1:DP=171	GT:DP:GQ:EC:SG	0/1:12:24:2:G	0/1:48:15:14:R	0:38:126:0:G	0/1:16:18:5:R	0/1:26:40:12:R	0/1:6:25:1:G	0/1:22:41:3:G	0:3:36:0:G
6644_GGCCGCCACCCTGGCTCCCACCCTCACACAGAGTG_NODE_2_length_291_cov_9.718213	131	.	T	C	72.5	PASS	NS=8:AN=1:DP=133	GT:DP:GQ:EC:SG	1:2:3:2:C	0:34:129:0:T	0:38:144:0:T	0:20:87:0:T	0/1:10:49:7:Y	0:5:42:0:T	0:21:90:0:T	0:3:36:0:T
6199_GGCCGCTGTGCGTGCCCTCACTTGCTCCTCCAAGA_NODE_2_length_296_cov_8.462838	76	.	C	T	34	PASS	NS=8:AN=1:DP=89:AS=CCAGCCACCCCAAACAAACATATAATCCAGCTGAAAACACGTACTTGCTG[C/T]GCAAATGGGACTCCCAGACAAATCCCCAAACCCCCCAAGCCTCTCACACA	GT:DP:GQ:EC:SG	1:2:3:2:T	0/1:22:88:14:Y	1:32:93:32:T	0/1:4:3:2:Y	1:10:27:10:T	0/1:4:15:1:C	1:14:39:14:T	1:1:4:1:C
480_GGCCGTTTTCCCCTTGCGCTTTTGGGAATTCGTCC_NODE_2_length_211_cov_9.691943	186	.	A	G	45.38	PASS	NS=8:AN=1:DP=141	GT:DP:GQ:EC:SG	0:12:63:0:A	0/1:17:9:4:R	1:28:81:28:G	0/1:33:30:10:R	0/1:20:64:13:R	0/1:6:17:1:A	1:20:57:20:G	0:5:42:0:A
268_GGCCGGGGAGAAAAGGCCTCTTGCTATACTCTTTT_NODE_2_length_323_cov_12.445821	197	.	A	C	78.25	PASS	NS=8:AN=1:DP=458	GT:DP:GQ:EC:SG	0/1:74:92:35:M	0/1:88:109:32:M	0/1:23:50:2:A	0/1:79:91:9:A	0/1:47:51:5:A	0:32:72:0:A	0/1:21:42:2:A	0/1:94:119:55:M
10030_GGCCGCTAGACCCCTCTAGCCAGCTCCAAAGTGGC_NODE_2_length_285_cov_19.154387	29	.	C	T	15	PASS	NS=7:AN=1:DP=41	GT:DP:GQ:EC:SG	.:0:0:0:.	1:10:27:10:T	1:16:45:16:T	1:3:6:3:T	1:3:6:3:T	1:5:12:5:T	1:3:6:3:T	1:1:3:1:C
9864_GGCCGCCGACGCCAGGTGGGACCGCTGTAAAGCTT_NODE_2_length_161_cov_13.490684	42	.	A	T	19.75	PASS	NS=8:AN=1:DP=56	GT:DP:GQ:EC:SG	1:1:1:1:A	1:13:45:13:T	1:10:30:10:T	0/1:6:13:5:W	1:6:15:6:T	1:6:18:6:T	1:7:18:7:T	1:7:18:7:T
6618_GGCCGAAGAAGCAAAATCGGAACAGACCCTAATTT_NODE_2_length_316_cov_7.202532	200	.	A	G	71	PASS	NS=8:AN=1:DP=190:AS=CATCCCATAAACGCTCTGTGGAGTGGAACGGGACGGCAACTAGAATGGGA[A/G]AAATTAAAAGTTGTAGCCCTGCTACAAACCTAATACCCGTGTTAGAAAAC	GT:DP:GQ:EC:SG	0:10:57:0:A	0/1:25:9:6:R	0:39:147:0:A	0/1:32:10:7:R	1:29:84:29:G	0:4:39:0:A	0:38:153:0:A	0:13:69:0:A
721_GGCCGTCTAAGATGCATCAGTTGGTCTCAACCCAC_NODE_2_length_165_cov_4.987879	66	.	C	T	12.17	PASS	NS=6:AN=1:DP=24	GT:DP:GQ:EC:SG	.:0:0:0:.	1:3:6:3:T	1:2:3:2:T	0/1:10:45:5:Y	1:2:3:2:T	.:0:0:0:.	1:6:15:6:T	1:1:1:1:C
7658_GGCCGGTCAGGGCCCAGATAAAACAGAGGCGAGAG_NODE_2_length_217_cov_6.470046	152	.	G	C	35.14	PASS	NS=7:AN=1:DP=41:AS=CTCTTCCCGGAACACGTGCGCTTTCTGGCGCCCGGAAGTGCGTCATCAGA[G/C]AACGCCAGCTGCCGCACGCTGCGGGGCCGTACCGTGGAGGCTCTGCGGTT	GT:DP:GQ:EC:SG	0/1:5:39:3:S	.:0:0:0:.	0:4:39:0:G	0/1:7:17:1:G	0:5:42:0:G	0/1:8:19:1:G	0:10:57:0:G	0:2:33:0:G
7614_GGCCGCAGCGTCTCCTTGAATTTCCTTTTGGCCAC_NODE_2_length_265_cov_11.230188	56	.	G	T	34.5	PASS	NS=6:AN=1:DP=74	GT:DP:GQ:EC:SG	.:0:0:0:.	1:19:54:19:T	1:26:78:26:T	1:4:9:4:T	1:6:15:6:T	1:6:15:6:T	1:13:36:13:T	.:0:0:0:.
7440_GGCCGGCTGCTCCCAAGTCCCTGGGGGCTCAGCTG_NODE_2_length_316_cov_16.417721	213	.	G	A,C	23.88	PASS	NS=8:AN=2:DP=78	GT:DP:GQ:EC:SG	0/1/2:7:16:1,1:G	0:1:30:0:G	0/1:12:19:3:R	0/1:19:77:8:R	0/1:18:9:2:G	0/2:3:10:1:G	0/1:14:24:4:R	0/1:4:6:1:G
602_GGCCGGGGGGTGACAGACTTGTTCCTGCTGGGCTC_NODE_2_length_179_cov_6.737430	55	.	T	C	39.75	PASS	NS=8:AN=1:DP=96	GT:DP:GQ:EC:SG	0:11:60:0:T	0:24:66:0:T	0:19:84:0:T	0/1:13:15:3:Y	0/1:6:34:3:Y	0:8:51:0:T	0/1:13:5:2:T	0/1:2:3:1:T
845_GGCCGTTCGCCTCGGCGTCCCCCACCCGGATTCGA_NODE_2_length_233_cov_24.858370	30	.	T	C	38	PASS	NS=7:AN=1:DP=66	GT:DP:GQ:EC:SG	0:3:36:0:T	1:9:24:9:C	0/1:25:62:18:Y	0:9:54:0:T	0:11:60:0:T	0/1:3:4:2:Y	0/1:6:26:4:Y	.:0:0:0:N
6655_GGCCGGCTCGTCCCTTTGCCCTGCGGGGTCAAGAG_NODE_2_length_295_cov_6.261017	44	.	C	G	23.14	PASS	NS=7:AN=1:DP=60	GT:DP:GQ:EC:SG	1:2:3:2:G	1:15:42:15:G	1:23:66:23:G	1:5:12:5:G	1:3:6:3:G	1:3:9:3:G	1:9:24:9:G	.:0:0:0:.
10956_GGCCGAAAGAAGGAAGAAAACAGCACCCAATCGGC_NODE_2_length_289_cov_14.134948	52	.	C	A	49.33	PASS	NS=6:AN=1:DP=51:AS=AAAAAAAGGACTGAAGACTTAACGGCTTAGTTGCAAATCGATATACTCAC[C/A]CAAGAGCAACCATGGCTTAATAACGCCAACTTGCAGGTCCAAGCTAAGGT	GT:DP:GQ:EC:SG	.:0:0:0:.	0:14:69:0:C	0/1:8:32:4:M	0:8:51:0:C	0:9:54:0:C	0:1:30:0:C	0:11:60:0:C	.:0:0:0:.
9678_GGCCGAGAAGGTTCCGCGTGGGACTGTAGAGGGAC_NODE_2_length_207_cov_8.661836	20	.	A	G	46.75	PASS	NS=8:AN=1:DP=197	GT:DP:GQ:EC:SG	0/1:17:10:3:R	0:41:88:0:A	0:42:93:0:A	0:32:60:0:A	0:16:42:0:A	0/1:20:24:4:R	0/1:28:27:3:A	0:1:30:0:A
4891_GGCCGCAGTTCCCTCAGGGAGGAGCAGCAGCCACA_NODE_2_length_274_cov_6.514598	109	.	C	A,T	37	PASS	NS=8:AN=2:DP=89:AS=TTAATAGGCAAAGCAATGTCAAACGTCAAACAGCCACCTCTCCACCACAC[C/A,T]GCTGAAATGGTTGGAGTTTGCCAACAAGGGCCTATTCTCCCAAAATAGGC	GT:DP:GQ:EC:SG	0:4:39:0:C	0/1:23:40:2:C	0/2:7:23:3:Y	0:23:96:0:C	0/1:8:22:1:C	0:2:33:0:C	0/2:18:4:3:C	0:4:39:0:C
4460_GGCCGTTGGAACCCACCAGCTGCTCTGCAGGAGAA_NODE_2_length_302_cov_5.731788	88	.	T	A	19.12	PASS	NS=8:AN=1:DP=59:AS=TAGAACTGCTAGCCTAGCTGATTTAATCCAAGGGAGGCAGCTTTTGTAAA[T/A]GCAGAGTGCCCTGAGGGAGATACAGGGCGGATCACTGAGGTAGGGCTATA	GT:DP:GQ:EC:SG	1:2:3:2:A	1:16:45:16:A	1:3:6:3:A	1:13:36:13:A	1:7:18:7:A	1:5:12:5:A	1:11:30:11:A	1:2:3:2:A
8812_GGCCGCAGTTTCCTCAGGGAGAAGCAGCCAGCCAC_NODE_2_length_161_cov_8.900621	149	.	A	C,G	24.5	PASS	NS=6:AN=2:DP=16	GT:DP:GQ:EC:SG	1:2:3:2:C	.:0:0:0:.	0:3:36:0:A	0:1:30:0:A	0:2:33:0:A	.:0:0:0:.	0/2:5:9:2:R	0:3:36:0:A
5033_GGCCGTTTATTTCCAGAAAAAAAAAAAAAAAAAAA_NODE_2_length_273_cov_8.157509	71	.	C	T	63.5	PASS	NS=8:AN=1:DP=113:AS=AATGAGAGCAACATTTCTTCCACCCAAGAAAAATACACCTAGGCACCTTA[C/T]GAACAGCATCAAAGCACTGCCCTTATTACGAAATGCAGTTATCATTTTAT	GT:DP:GQ:EC:SG	0:8:51:0:C	0:30:117:0:C	0:15:72:0:C	0:16:75:0:C	0:17:78:0:C	0:7:48:0:C	0/1:19:37:5:Y	0:1:30:0:C
1014_GGCCGAGTACAGATTCCGGACGCGGAACGGGCAAT_NODE_2_length_293_cov_19.136518	175	.	A	T	70.38	PASS	NS=8:AN=1:DP=385:AS=TTCTTGTATCGACCCATTACTCAGATGCTTGTTGCGGAAGACGGCTCTTT[A/T]TTTCCGTACGATGGGCTGAGGCAAGTCTTTTATACGATCTTGAGTCTTTT	GT:DP:GQ:EC:SG	1:29:78:29:T	0/1:28:44:12:W	1:49:86:49:T	0/1:77:30:31:W	0:83:215:0:A	0/1:25:42:11:W	0/1:81:43:36:W	0/1:13:25:5:W
972_GGCCGCCGTAAGCGGACTCTGGCCGAAGAGTGAAA_NODE_2_length_184_cov_17.565218	22	.	C	T	21.57	PASS	NS=7:AN=1:DP=67	GT:DP:GQ:EC:SG	1:4:9:4:T	1:9:24:9:T	1:8:21:8:T	0/1:11:1:10:Y	1:14:39:14:T	1:7:18:7:T	1:14:39:14:T	.:0:0:0:.
4271_GGCCGAACCCTGGAGAGGAAGGAGCTATGCAGAGA_NODE_2_length_194_cov_3.958763	97	.	C	G	15.25	PASS	NS=8:AN=1:DP=18	GT:DP:GQ:EC:SG	0:2:33:0:C	0/1:5:15:2:S	1:2:3:2:G	0:2:33:0:C	1:2:3:2:G	0:1:30:0:C	1:2:3:2:G	0/1:2:2:1:C
3252_GGCCGCCGGCTCCTAAGTCCCTGGGGGCTCTGCTG_NODE_2_length_376_cov_13.074468	78	.	C	T	42.12	PASS	NS=8:AN=1:DP=235	GT:DP:GQ:EC:SG	0/1:4:22:1:C	0/1:84:90:39:Y	0/1:74:81:33:Y	0:18:59:0:C	0/1:16:13:4:Y	0/1:11:7:2:C	0/1:27:35:8:Y	0:1:30:0:C
10343_GGCCGCTCGCCCTCCGCCCAGGGGTGTGAGCCGCG_NODE_2_length_249_cov_6.538153	148	.	C	A	42	PASS	NS=8:AN=1:DP=117:AS=AAGGAAGCAGACTGCCACATTTTTCTCTCACGGAGCCGCTGGTGGGTTCG[C/A]ACCACCGCTCTTTCGATTAGCAGCCCAGCGCTTAACCATTGCGCCACCAG	GT:DP:GQ:EC:SG	1:4:12:4:A	1:15:42:15:A	1:25:72:25:A	1:32:93:32:A	1:10:30:10:A	1:11:30:11:A	1:17:51:17:A	1:3:6:3:A
9181_GGCCGCTGGGTTAGAACTGCTGACCTTTAACCAAG_NODE_2_length_298_cov_4.328859	109	.	G	A	10	PASS	NS=6:AN=1:DP=26:AS=TGGATACAGAAGTCAAAGGGAAGGCTCTTTGGGCAGACTCCCATAGGCCT[G/A]CTTCTCTAAATTAGCTTTAGATTTAGAAAGGAAAATTCTCCTTCTTTCTC	GT:DP:GQ:EC:SG	1:4:9:4:A	1:5:12:5:A	1:5:12:5:A	1:6:15:6:A	.:0:0:0:.	1:1:0:1:A	1:5:12:5:A	.:0:0:0:.
2632_GGCCGTAGCATGTTCGCTGATGACGGTTCTACGTT_NODE_2_length_281_cov_20.508896	270	.	T	C	37.17	PASS	NS=6:AN=1:DP=57	GT:DP:GQ:EC:SG	1:11:30:11:C	.:0:0:0:.	.:0:0:0:.	0/1:12:42:5:Y	1:10:27:10:C	0/1:7:19:1:T	0:4:39:0:T	0:13:66:0:T
1716_GGCCGTCGAGTTAATTACGACTTCTAGCAATGCTA_NODE_2_length_244_cov_12.229508	178	.	A	C	40.38	PASS	NS=8:AN=1:DP=104:AS=GAGGAAGGCCAGAGAGAGGGTTATTCATGGGGTATTTTCCCCAGGATATT[A/C]CTAAGGCAGAAACTCAACCTGCTCTTCAGTCTTCCACCGAAGAGCTCTCA	GT:DP:GQ:EC:SG	0:1:30:0:A	0/1:7:46:4:M	1:8:21:8:C	0/1:26:81:12:M	0/1:22:19:5:M	1:8:21:8:C	0/1:26:90:14:M	1:6:15:6:C
10913_GGCCGGTATGGTGTGGCAGCTCTGAAAGAGGAGGA_NODE_2_length_325_cov_18.329231	239	.	C	T	141	PASS	NS=8:AN=1:DP=445:AS=CATCTTTGGAATCTCTGGGCAAGTGGGAGTCACCACATCCTCCTCTAACT[C/T]CACTGTGCTCTAGCCACTTCAACACTCAGCAGAATTCCTTGCTCCCTGTT	GT:DP:GQ:EC:SG	0:22:93:0:C	0:10:57:0:C	0:68:212:0:C	0:103:233:0:C	0:90:231:0:C	0:38:141:0:C	0/1:83:41:29:Y	0:31:120:0:C
6857_GGCCGCCGGGTTTCCCCCCGGGGCGGGCCGCCGGC_NODE_2_length_315_cov_8.780952	299	.	C	T	33.43	PASS	NS=7:AN=1:DP=47	GT:DP:GQ:EC:SG	1:8:21:8:T	.:0:0:0:.	0:7:48:0:C	0/1:13:26:4:Y	0:3:36:0:C	0/1:7:22:1:C	0:6:45:0:C	0:3:36:0:C
3707_GGCCGGGCTTGCGGCCCCGCCGCTCGCCGCCCTAG_NODE_2_length_315_cov_12.076191	58	.	G	A	26	PASS	NS=6:AN=1:DP=49	GT:DP:GQ:EC:SG	1:1:8:1:G	0/1:17:39:6:R	1:14:39:14:A	0/1:7:2:2:G	0:5:42:0:G	.:0:0:0:.	0/1:5:26:1:G	.:0:0:0:.
[truncated: 271 more rows]
