# Supplementary material for: Two Different High Throughput Sequencing Approaches Identify Thousands of De Novo Genomic Markers for the Genetically Depleted Bornean Elephant
Source: PLoS One. 2012 Nov 21;7(11):e49533. doi: 10.1371/journal.pone.0049533 (PMC3504023; doi:10.1371/journal.pone.0049533)
Supplement: Table S2 — Summary of SSRs (simple sequence repeats) identified in the Bornean elephant sequence dataset. The number of SSRs or microsatellite loci identified in E. m. borneensis (n = 2) using the 454 shotgun sequencing approach, and the subset of these that are potentially amplifiable (containing suitable PCR priming sites) and validated. The di- and tri-nucleotide microsatellite repeat classes (≥3) were more abundant than the tetra-nucleotides. (XLSX) [file pone.0049533.s002.xlsx]

## Sheet: Table S2
	SSR	Repeat class	Total number of identified loci	Number of potentially amplifiable loci	Primers tested (only for ≥ 4 repeats)	Successful validation
	Mono-nucleotides	≥ 20	1	-	-	-
		≥ 10	-	-	-	-
		≥ 8	2047	-	-	-
		≥ 6	6898	-	-	-
		≥ 4	17520	-	-	-
		≥ 3	18188	-	-	-
		All	44654	-	-	-
	Di-nucleotides	≥ 20	2	0	-	-
		≥ 10	7	2	-	-
		≥ 8	57	19	-	-
		≥ 6	147	52	-	-
		≥ 4	1386	209	12	4
		≥ 3	7241	608	-	-
		All	8840	890	12	4
	Tri-nucleotides	≥ 20	0	0	-	-
		≥ 10	1	0	-	-
		≥ 8	2	2	-	-
		≥ 6	18	10	-	-
		≥ 4	264	139	10	6
		≥ 3	1471	474	-	-
		All	1756	625	10	6
	Tetra-nucleotides	≥ 20	2	0	-	-
		≥ 10	3	2	-	-
		≥ 8	9	4	-	-
		≥ 6	14	6	-	-
		≥ 4	75	26	33	15
		≥ 3	326	153	-	-
		All	429	191	33	15
	Total	-	27226	1706	55	25
