# Supplementary material for: Two Different High Throughput Sequencing Approaches Identify Thousands of De Novo Genomic Markers for the Genetically Depleted Bornean Elephant
Source: PLoS One. 2012 Nov 21;7(11):e49533. doi: 10.1371/journal.pone.0049533 (PMC3504023; doi:10.1371/journal.pone.0049533)
Supplement: Table S5 — Gene Ontology (GO) term representation of RAD-seq contigs. The GO terms were obtained for RAD-contigs containing SNPs using Ensembl gene annotation of L. africana. In these RAD-seq contigs, 35 unique GO terms were represented. (XLSX) [file pone.0049533.s005.xlsx]

## Sheet: Table S5
	Subject Seq-id (ID of the database hit)	Location in scaffold (start of alignment)	Location in scaffold (end of alignment)	Ensembl Gene ID	GO Term Accession	GO Term Name
	scaffold_140	640512	796628	ENSLAFG00000026369	GO:0005488	binding
	scaffold_118	794383	837518	ENSLAFG00000009351	GO:0006816	calcium ion transport
	scaffold_110	2084563	2088800	ENSLAFG00000018209	GO:0008284	positive regulation of cell proliferation
	scaffold_18	1720583	1841079	ENSLAFG00000013706	GO:0007165	signal transduction
	scaffold_172	261820	276160	ENSLAFG00000005023	GO:0006508	proteolysis
	scaffold_103	3836125	4021019	ENSLAFG00000014718	GO:0006468	protein phosphorylation
	scaffold_153	729627	733793	ENSLAFG00000032694	GO:0031032	actomyosin structure organization
	scaffold_35	11905935	12057583	ENSLAFG00000015085	GO:0006811	ion transport
	scaffold_41	8558902	8560266	ENSLAFG00000022576	GO:0007186	G-protein coupled receptor protein signaling pathway
	scaffold_79	2507276	2560154	ENSLAFG00000005994	GO:0007186	G-protein coupled receptor protein signaling pathway
	scaffold_83	4611960	4732534	ENSLAFG00000008469	GO:0006355	regulation of transcription, DNA-dependent
	scaffold_122	2181074	2210107	ENSLAFG00000017450	GO:0007186	G-protein coupled receptor protein signaling pathway
	scaffold_29	17892698	17964864	ENSLAFG00000000935	GO:0016021	integral to membrane
	scaffold_8	16462770	16561993	ENSLAFG00000015419	GO:0006810	transport
	scaffold_33	3766419	3768508	ENSLAFG00000000225	GO:0042946	glucoside transport
	scaffold_5	30514227	30672082	ENSLAFG00000006942	GO:0000122	negative regulation of transcription from RNA polymerase II promoter
	scaffold_72	5251401	5302000	ENSLAFG00000008470	GO:0006470	protein dephosphorylation
	scaffold_7	24367012	24728159	ENSLAFG00000017027	GO:0007156	homophilic cell adhesion
	scaffold_13	10605699	10635120	ENSLAFG00000021679
	scaffold_58	4911541	5313708	ENSLAFG00000021385	GO:0006468	protein phosphorylation
	scaffold_54	11600683	11634606	ENSLAFG00000023138	GO:0016192	vesicle-mediated transport
	scaffold_28	9671598	9687674	ENSLAFG00000003426	GO:0055114	oxidation-reduction process
	scaffold_21	29529000	29983329	ENSLAFG00000007364	GO:0007264	small GTPase mediated signal transduction
	scaffold_9	36321539	36554972	ENSLAFG00000003614	GO:0007049	cell cycle
	scaffold_1	37872980	37983633	ENSLAFG00000015124	GO:0005622	intracellular
	scaffold_2	15896031	15934928	ENSLAFG00000005676	GO:0030133	transport vesicle
	scaffold_55	889412	1085563	ENSLAFG00000003375	GO:0005515	protein binding
	scaffold_47	4691333	4712750	ENSLAFG00000030443	GO:0006810	transport
	scaffold_34	14194733	14202707	ENSLAFG00000015951	GO:0007186	G-protein coupled receptor protein signaling pathway
	scaffold_25	25527163	25557502	ENSLAFG00000017337	GO:0015031	protein transport
	scaffold_27	20619161	20880697	ENSLAFG00000021821	GO:0007155	cell adhesion
	scaffold_12	18729501	18766536	ENSLAFG00000009559	GO:0005604	basement membrane
	scaffold_73	895103	933304	ENSLAFG00000001762	GO:0045040	protein import into mitochondrial outer membrane
	scaffold_114	1498172	1673420	ENSLAFG00000026499	GO:0016192	vesicle-mediated transport
	scaffold_26	23245279	23525165	ENSLAFG00000008358
	scaffold_31	19166418	19176076	ENSLAFG00000001493	GO:0030334	regulation of cell migration
	scaffold_60	7158690	7256104	ENSLAFG00000003729	GO:0006810	transport
	scaffold_46	7107598	7129842	ENSLAFG00000030188	GO:0005925	focal adhesion
	scaffold_0	109942600	109946303	ENSLAFG00000003844	GO:0005515	protein binding
	scaffold_3	31364833	31393874	ENSLAFG00000011949	GO:0030001	metal ion transport
	scaffold_53	13427683	13498348	ENSLAFG00000002041	GO:0006468	protein phosphorylation
	scaffold_43	1440018	1462757	ENSLAFG00000017309	GO:0055114	oxidation-reduction process
	scaffold_48	12524905	12703399	ENSLAFG00000017476	GO:0006355	regulation of transcription, DNA-dependent
	scaffold_71	3257021	3429910	ENSLAFG00000022616	GO:0000042	protein targeting to Golgi
	scaffold_159	232458	495655	ENSLAFG00000016107	GO:0034220	ion transmembrane transport
	scaffold_6	24850187	25025387	ENSLAFG00000003263	GO:0055114	oxidation-reduction process
	scaffold_11	13807312	14337652	ENSLAFG00000001353	GO:0016020	membrane
	scaffold_22	24495950	24668520	ENSLAFG00000002084	GO:0008284	positive regulation of cell proliferation
	scaffold_10	60123874	60305148	ENSLAFG00000004091	GO:0005913	cell-cell adherens junction
