# Supplementary material for: Two Different High Throughput Sequencing Approaches Identify Thousands of De Novo Genomic Markers for the Genetically Depleted Bornean Elephant
Source: PLoS One. 2012 Nov 21;7(11):e49533. doi: 10.1371/journal.pone.0049533 (PMC3504023; doi:10.1371/journal.pone.0049533)
Supplement: Table S6 — Recent SNP discovery efforts in non-model species. A literature review of recent SNP discovery efforts in non-model species using high throughput sequencing platforms. (XLSX) [file pone.0049533.s006.xlsx]

## Sheet: Table S6
	Species	Study type	NGS platform used to identify SNPs	Number of potential SNPs	Number of validated SNPs	Percentage validation	Methods used to validate SNPs	References
	Coral (Acroporamillepora)	Population Genetics	NGS-454	33433	14 / 20	0.7	Resequencing	Meyer et al. (2009)
	Giant Panda (Ailuropoda melanoleura)	Population Genteics	NGS-Illumina	2700000	0	0	N/A	Li et al. (2010)
	Turkey (Meleagris gallopavo)	undefined	NGS (RRL)-Illumina	7952	340 / 384	0.885	Illumina Golden Gate	Kerstens et al.(2009)
	Mallard Duck (Anas platyrhynchos)	Develop genomic resources	NGS (RRL)-Illumina	150000	364 / 384	0.947	Illumina Golden Gate	Kraus et al.(2011)
	Great Tit (Parus major)	QTL mapping study	NGS (RRL)-Illumina	20000	55 / 66	0.84	Sanger sequencing	Van Bers et al.(2010)
	European hake (Merluccius merluccius)	develop SNPs linked to functional loci	454-Illumina	454 (4,034), GAII (8,606)	409 / 944, 296 / 684	~ 43%	Illumina Golden Gate	Milano et al.(2011)
	Eggplant (Solanum melongena L.)	Mapping	NGS (RAD)-Illumina	10089	343 / 384	0.893	Illumina Golden Gate	Barchi et al.(2011)
	Artichoke (Cynara cardunculus L. var. scolymus)	Mapping	NGS (RAD)-Illumina	34000	19 / 24	0.79	Cleaved Amplified Polymorphic Sequence (CAPS) assay	Scaligone et al.(2012)
	Lake whitefish (Coregonus spp.)	Classification	NGS-454	6042	25 / 31	0.806	Sequenom MassARRAY	Renaut et al.(2010)
	Rainbow trout (Oncorhynchus mykiss)	Mapping/Classification	NGS-454	13,140-24 ,627	183 / 384	0.476	Golden Gate Assay	Sanchez et al. (2009)
	Rose Gum (Euclayptus grandis)	Classification	NGS-454	30108	279 /337	0.827	Resequencing	Novaes et al.(2008)
	Aphid (Aphis glycines)	Develop genomic resources	NGS-454, NGS (RRL)-Illumina	635	11 /11	1	Allele Specific Primer Extension (ASPE) assay	Bai et al.(2010)
	Ascomycete(Ophiognomonia clavigignenti-juglandacearum)	Develop genomic resources	NGS-454	298	12 /32	0.375	Sanger sequencing	Broders et al.(2011)
	Teleost (Fundulus heteroclitus)	Population Genetics	NGS-454	261	65 /81	0.8	Sequenom MassARRAY	Williams et al.(2010)
	Sockeye salmon (Oncorhynchus nerka)	Population Genomics	NGS-Solid	1,928-5,657	51 /96	0.53	PCR, HRMA, Sanger sequencing, Taqman	Everett et al. (2011)
	Threespine stickleback (Gasterosteus aculeatus)	Develop genomic resources	NGS (RAD)-Illumina	40441	13 /13	1	Sanger sequencing	Etter et al. (2011)
	SNP:Single nucleotide polymorphism
	RRL: Reduced representation library
	NGS: Next generation sequencing
	HRMA: High-resolution melt analysis
	References
	1. Meyer E, Aglyamova GV, Wang S, Buchanan-Carter J, Abrego D, et al. (2009) Sequencing and de novo analysis of a coral larval transcriptome using 454 GSFlx BMC Genomics 10.
	2. Li R, Fan W, Tian G, Zhu H, He L, et al. (2012) The sequence and de novo assembly of the giant panda genome. Nature 463: 311-317.
	3. Kerstens HH, Crooijmans RP, Veenendaal A, Dibbits BW, FC T, et al. (2009) Large scale single nucleotide polymorphism discovery in unsequenced genomes using second generation high throughput sequencing technology: applied to turkey. BMC Genomics 10: 479–489.
	4. Kraus RH, Kerstens HH, Hooft PV, Crooijmans RP, Poel JJVD, et al. (2011) Genome wide SNP discovery, analysis and evaluation in mallard (Anas platyrhynchos). BMC Genomics 12: 150.
	5. Van Bers NE, Oers Kv, Kerstens HH, Dibbits BW, Crooijmans RP, et al. (2010) Genome-wide SNP detection in the great tit Parus major using high throughput sequencing. Molecular Ecology 19: 89-99.
	6. Milano I, Babbucci M, Panitz F, Ogden R, Nielsen RO, et al. (2011) Novel tools for conservation genomics: comparing two high-throughput approaches for SNP discovery in the transcriptome of the European Hake. PLoS One 6.
	7. Barchi L, Lanteri S, Portis E, Acquadro A, Valè G, et al. (2011) Identification of SNP and SSR markers in eggplant using RAD tag sequencing. BMC Genomics 12: 304.
	8. Scaglione D, Acquadro A, Portis E, Tirone M, Knapp SJ, et al. (2012) RAD tag sequencing as a source of SNP markers in Cynara cardunculus L. BMC Genomics 13: 3.
	9. Renaut S, Nolte AW, Bernatchez L (2010) Mining transcriptome sequences towards identifying adaptive single nucleotide polymorphisms in lake whiteﬁsh species pairs (Coregonus spp. Salmonidae). Molecular Ecology 19 (Suppl. 1) 115–131.
	10. Sánchez CC, Smith TP, Ralph T Wiedmann, Vallejo RL, Salem M, et al. (2009) Single nucleotide polymorphism discovery in rainbow trout by deep sequencing of a reduced representation library. BMC Genomics 10.
	11. Novaes E, Drost DR, Farmerie WG, Jr GJP, Grattapaglia D, et al. (2008) High-throughput gene and SNP discovery in Eucalyptus grandis, an uncharacterized genome. BMC Genomics 9
	12. Bai X, Zhang W, Orantes L, Jun T-H, Mittapalli O, et al. (2010) Combining Next-Generation Sequencing Strategies for Rapid Molecular Resource Development from an Invasive Aphid Species, Aphis glycines. PLoS One 5.
	13. Broders KD, Woeste KE, Sanmiguel PJ, Westerman RP, Boland GJ (2011 ) Discovery of single-nucleotide polymorphisms (SNPs) in the uncharacterized genome of the ascomycete Ophiognomonia clavigignenti-juglandacearum from 454 sequence data. Molecular Ecology Resources 11: 693–702.
	14. Williams LM, Ma X, Boyko AR, Bustamante CD, Oleksiak MF (2010) SNP identification, verification, and utility for population genetics in a non-model genus. BMC Genetics 11.
	15. Everett MV, Grau ED, Seeb JE (2011) Short reads and nonmodel species: exploring the complexities of next-generation sequence assembly and SNP discovery in the absence of a reference genome. Molecular Ecology Resources 11: 93-108
	16. Etter PD, Preston JL, Bassham S, Cresko WA, Johnson EA (2011) Local De Novo Assembly of RAD Paired-End Contigs Using Short Sequencing Reads. PLoS One 6.
